# Supplementary material for: Essential Oils of Aromatic Plant Species from the Atlantic Rainforest Exhibit Extensive Chemical Diversity and Antimicrobial Activity
Source: MDPI journal article supplement (doi:10.3390/antibiotics11121844), 2022-12-19
Supplement: s1 [file s1]

**Table S6.** Botanical classification, biome of occurrence, aroma description, antimicrobial action, and reported EO toxicity of the plants sampled in Atlantic Rainforest locations. Antimicrobial action and non-target toxicity information were retrieved from database and search engine queries from 2010 to 2022. Investigated databases were Agris (<http://agris.fao.org>), AGRICOLA (<https://agricola.nal.usda.gov>), Scopus (<https://www.scopus.com>), PubMed (<http://pubmed.ncbi.nlm.nih.gov>), and the core collection of Web of Science (<https://apps.webofknowledge.com>), and search engines were Google Scholar (<https://scholar.google.no/>) and JSTOR ([jstor.org](http://www.jstor.org)). No report retrieved is shown as information not available (na).

| Botanical Family | Genera                                                  | Biome/Aroma descriptor                                     | Antimicrobial action                                                                     | Toxicity (non-target)                                                                                                                                                                                                                               | References   |
|------------------|---------------------------------------------------------|------------------------------------------------------------|------------------------------------------------------------------------------------------|-----------------------------------------------------------------------------------------------------------------------------------------------------------------------------------------------------------------------------------------------------|--------------|
| Anacardiaceae    | <i>Schinus</i>                                          | Cerrado, Atlantic rainforest/<br>waxy, herbal, woody green | antibacterial, antifungal,<br>insecticidal, antiparasitic,<br>disinfectant, oral hygiene | sesquiterpenes, <i>in vitro</i> [1]; $\alpha$ -<br>phellandrene, <i>in vitro</i> [2]                                                                                                                                                                | [3, 4, 5, 6] |
| Annonaceae       | <i>Annona</i> ,<br><i>Guatteria</i> ,<br><i>Xylopia</i> | Cerrado/ sweet, pungent,<br>bitter, oily                   | antibacterial, antifungal,<br>antiparasitic                                              | spathulenol, caryophyllene oxide,<br>$\alpha$ -pinene and bicyclogermacrene<br>[7]; germacrene D,<br>bicyclogermacrene, (E)-<br>caryophyllene and germacrene B<br>[8]; $\alpha$ -pinene, limonene, <i>in vivo</i> ,<br>no genotoxicity detected [9] | [7, 8, 10]   |
| Araceae          | <i>Monstera</i>                                         | Atlantic and Amazon<br>ainforest/ fruity, sweet,           | antibacterial, antifungal,<br>insecticidal, antiparasitic,                               | na                                                                                                                                                                                                                                                  | [11, 12]     |

|               |                                                                                               | alcoholic, spicy                                                                        | disinfectant                                                                   |                                                                                                                                            |                  |
|---------------|-----------------------------------------------------------------------------------------------|-----------------------------------------------------------------------------------------|--------------------------------------------------------------------------------|--------------------------------------------------------------------------------------------------------------------------------------------|------------------|
| Araliaceae    | <i>Dendropanax</i>                                                                            | Cerrado, Atlantic rainforest/<br>herbal, alcoholic, woody green                         | antibacterial, antifungal,<br>insecticidal, antiparasitic,<br>antiviral (Asia) | na                                                                                                                                         | [13, 14]         |
| Asteraceae    | <i>Baccharis</i> ,<br><i>Cyrtocymura</i>                                                      | Cerrado/ sweet, resinous,<br>woody                                                      | antibacterial, antifungal,<br>antiviral, skin hygiene                          | carquejyl acetate, <i>in vivo</i> study,<br>no toxicity detected [15]                                                                      | [16, 17, 18]     |
| Euphorbiaceae | <i>Croton</i>                                                                                 | Cerrado, Atlantic rainforest/<br>pine needle-like, herbal, oily,<br>woody green         | antibacterial, antifungal,<br>insecticidal, antiparasitic                      | eugenol, methyl-eugenol, no<br>toxicity detected [19]; anethole<br>and estragole, <i>in vivo</i> study,<br>tubule-interstitial injury [20] | [21, 22]         |
| Lauraceae     | <i>Aiouea</i> , <i>Aniba</i> ,<br><i>Endlicheria</i> ,<br><i>Nectandra</i> ,<br><i>Ocotea</i> | Cerrado, Atlantic and Amazon<br>rainforest/ cinnamon-like,<br>woody, sweet, oily, fruit | antibacterial, antifungal,<br>antiviral, skin and oral<br>hygiene              | 1-nitro-2-phenylethane,<br>methyleugenol, eugenol, safrol, <i>in vivo</i> , no toxicity detected [23]                                      | [24, 25, 26, 27] |
| Meliaceae     | <i>Trichilia</i>                                                                              | Cerrado, Atlantic and Amazon<br>rainforest/ sweet, fruity, oily,<br>citrus-like         | antibacterial, antifungal,<br>insecticidal, antiparasitic                      | na                                                                                                                                         | [28, 29]         |
| Myristicaceae | <i>Virola</i>                                                                                 | Atlantic and Amazon<br>rainforest/ flowery, sweet,                                      | antibacterial, antifungal,<br>antiparasitic                                    | na                                                                                                                                         | [30, 31, 32]     |

|             |                                                                                                             |                                                                                 |                                                                                                      |                                                                                                                                                                                                                                                                                    |                         |
|-------------|-------------------------------------------------------------------------------------------------------------|---------------------------------------------------------------------------------|------------------------------------------------------------------------------------------------------|------------------------------------------------------------------------------------------------------------------------------------------------------------------------------------------------------------------------------------------------------------------------------------|-------------------------|
| citrus-like |                                                                                                             |                                                                                 |                                                                                                      |                                                                                                                                                                                                                                                                                    |                         |
| Myrtaceae   | <i>Calypttranthes</i> ,<br><i>Campomanesi</i><br><i>a, Eugenia</i> ,<br><i>Marlierea</i> ,<br><i>Myrcia</i> | Cerrado, Atlantic rainforest/<br>fruity, sweet                                  | antibacterial,<br>antifungal, antiparasitic                                                          | (Z)- $\alpha$ -trans-bergamotene, $\alpha$ -<br>sinensal, (Z)- $\alpha$ -bisabolene, <i>in</i><br><i>vitro</i> , high toxicity<br>[33]; $\beta$ -caryophyllene, $\delta$ -cadinene,<br>$\alpha$ -pinene, $\beta$ -pinene, moderate<br>toxicity, eliminated in<br>nanoemulsion [34] | [35, 36, 37, 38]        |
| Piperaceae  | <i>Piper</i>                                                                                                | Cerrado, Atlantic and Amazon<br>rainforest/ pepper-like, herbal,<br>green       | antibacterial, antifungal,<br>insecticidal, antiparasitic                                            | $\beta$ -caryophyllene, $\alpha$ -humulene, and<br>germacrene D, no toxicity<br>detected [39]; <i>in vivo</i> , no toxicity<br>detected [40]                                                                                                                                       | [41, 42, 43, 44]        |
| Rutaceae    | <i>Esenbeckia</i> ,<br><i>Helietta</i> ,<br><i>Metrodorea</i> ,<br><i>Zanthoxylum</i>                       | Cerrado, Atlantic rainforest/<br>pine needle-like, citrus-like,<br>spicy, woody | antibacterial, antifungal,<br>insecticidal, antiparasitic,<br>disinfectant, skin and oral<br>hygiene | linalyl acetate, limonene, and $\alpha$ -<br>terpineol, no detected toxicity as<br>nanoemulsion [45]; limonene, $\beta$ -<br>pinene, <i>in vivo</i> , no toxicity<br>detected [46]                                                                                                 | [47, 48, 49, 50,<br>51] |
| Salicaceae  | <i>Casearia</i>                                                                                             | Cerrado, Atlantic and Amazon                                                    | antibacterial, antifungal,                                                                           | $\beta$ -caryophyllene, $\beta$ -humulene,                                                                                                                                                                                                                                         | [53, 54]                |

|             |                |                                                                                                 |                                             |                                                                                                                                                                                                                                             |              |
|-------------|----------------|-------------------------------------------------------------------------------------------------|---------------------------------------------|---------------------------------------------------------------------------------------------------------------------------------------------------------------------------------------------------------------------------------------------|--------------|
|             |                | rainforest/ pine needle-like,<br>spicy, herbal, woody green                                     | antiparasitic                               | selective cytotoxicity to tumoral<br>cells [52]                                                                                                                                                                                             |              |
| Sapindaceae | <i>Cupania</i> | Atlantic and Amazon<br>rainforest/ nut-like, woody,<br>oily, spicy                              | antibacterial, antifungal                   | na                                                                                                                                                                                                                                          | [11, 55, 56] |
| Verbenaceae | <i>Aloysia</i> | Atlantic and Amazon<br>rainforest/ citrus-like, fruity,<br>flower, herbal, pine needle-<br>like | antibacterial, antifungal,<br>antiparasitic | (E)-caryophyllene,<br>bicyclogermacrene, germacrene<br>D, terpinolene, and sabinene, <i>in</i><br><i>vitro</i> , toxicity to fibroblasts<br>[57]; linalool, geraniol, neral, and<br>limonene, <i>in vivo</i> , no toxicity<br>detected [58] | [59, 60, 61] |

## References

1. Mattar, V.T.; Borioni, J.L.; Hollmann, A.; Rodriguez, S.A. Insecticidal activity of the essential oil of *Schinus areira* against *Rhipibruchus picturatus* (F.) (Coleoptera: Bruchinae), and its inhibitory effects on acetylcholinesterase. *Pestic Biochem Physiol.* **2022**, *185*, 105134. doi: 10.1016/j.pestbp.2022.105134.
2. de Groot, A.C.; Schmidt, E. Tea tree oil: contact allergy and chemical composition. *Contact Dermatitis* **2016**, *75*:129-143. doi: 10.1111/cod.12591.

3. Moura-Costa, G.F.; Nocchi, S.R.; Ceole, L.F.; de Mello, J.C.P.; Nakamura, C.V.; Dias Filho, P.B.; Temponi, L.G.; Ueda-Nakamura, T. Antimicrobial activity of plants used as medicinals on an indigenous reserve in Rio das Cobras, Paraná, Brazil. *J. Ethnopharmacol.* **2012**, *143*, 631-638. doi: <https://doi.org/10.1016/j.jep.2012.07.016>.
4. Gehrke, I. T.; Neto, A. T.; Pedroso, M.; Mostardeiro, C. P.; da Cruz, I. B.; Silva, U. F.; Ilha, V.; Dalcol, I. I.; Morel, A. F. Antimicrobial activity of *Schinus lentiscifolius* (Anacardiaceae). *J. Ethnopharmacol.* **2013**, *148*, 486–491. <https://doi.org/10.1016/j.jep.2013.04.043>.
5. Uliana, M.P.; Fronza, M.; da Silva, A.G.; Vargas, T.S.; de Andrade, T.U.; Scherer, R. Composition and biological activity of Brazilian rose pepper (*Schinus terebinthifolius* Raddi) leaves. *Ind. Crops Prod.* **2016**, *83*, 235-240. doi: <https://doi.org/10.1016/j.indcrop.2015.11.077>.
6. de Souza Feitosa Lima, I.M.; Zagmignan, A.; Santos, D.M.; Maia, H.S.; dos Santos Silva, L.; da Silva Cutrim, B.; Vieira, S.L.; Bezerra Filho, C.M.; de Sousa, E.M.; Napoleão, T.H.; Krogfelt, K.A.; Løbner-Olesen, A.; Paiva, P.M.G.; Nascimento da Silva, L.C. *Schinus terebinthifolia* leaf lectin (SteLL) has anti-infective action and modulates the response of *Staphylococcus aureus*-infected macrophages. *Sci Rep.* **2019**, *9*, 18159. doi: 10.1038/s41598-019-54616-x.
7. Cascaes, M.M.; De Moraes, Â.A.B.; Cruz, J.N.; Franco, C.J.P.E.; Silva, R.C.; Nascimento, L.D.D.; Ferreira, O.O.; Anjos, T.O.D.; de Oliveira, M.S.; Guilhon, G.M.S.P.; Andrade, E.H.A. Phytochemical profile, antioxidant potential and toxicity evaluation of the essential oils from *Duguetia* and *Xylopia* species (Annonaceae) from the Brazilian Amazon. *Antioxidants* (Basel). **2022**, *11*, 1709. doi: 10.3390/antiox11091709.
8. Pereira, T.S., Machado Esquissato, G.N., Costa, E.V., Nogueira, P.C.L., Castro-Prado, M.A.A. Mutagenic and cytostatic activities of the *Xylopia laevigata* essential oil in human lymphocytes. *Nat Prod Res.* **2021**, *35*, 1682-1685. doi: 10.1080/14786419.2019.1624956.
9. Moura, A.P.; Beltrão, D.M.; Pita, J.C.; Xavier, A.L.; Brito, M.T.; Sousa, T.K.; Batista, L.M.; Carvalho, J.E.; Ruiz, A.L.; Della Torre, A.; Duarte, M.C.; Tavares, J.F.; da Silva, M.S.; Sobral, M.V. Essential oil from fruit of *Xylopia langsdorffiana*: antitumour activity and toxicity. *Pharm Biol.* **2016**, *54*, 3093-3102. doi:10.1080/13880209.2016.1211154.

10. Nascimento, M.N.G.; Junqueira, J.G.M.; Terezan, A.P.; Severino, R.P.; Silva, T.S.; Martins, C.H.G.; Severino, V.G.P. Chemical composition and antimicrobial activity of essential oils from *Xylopia aromatica* (Annonaceae) flowers and leaves. *Rev. Virtual Quim.* **2018**, *10*, 1578-1590. doi: 10.21577/1984-6835.20180107
11. Ricardo, L.M., de Paula-Souza, J., Andrade, A., Brandão, M.G.L. Plants from the Brazilian traditional medicine: species from the books of the Polish physician Piotr Czerniewicz (Pedro Luiz Napoleão Chernoviz, 1812–1881). *Rev. Bras. Farmacog.* **2017**, *27*, 388-400. doi: <https://doi.org/10.1016/j.bjp.2017.01.002>.
12. Meneguelli, A.Z.; Camargo, E.E.S.; Buccini, D.F.; Roriz, B.C.; Cerqueira, G.R.; Moreno, S.E. Ethnopharmacological and botanical evaluation of medicinal plants used by Brazilian Amazon Indian community. *Interações (Campo Grande)* **2020**, *21*, 3. doi: <https://doi.org/10.20435/inter.v21i3.2926>
13. Cruz-Galvez, A.M.; Gómez-Aldapa, C.A.; Villagómez-Ibarra, J.R.; Chavarría-Hernández, N.; Rodríguez-Baños, J.; Rangel-Vargas, E.; Castro-Rosas, J. Antibacterial effect against foodborne bacteria of plants used in traditional medicine in central Mexico: studies in vitro and in raw beef. *Food Control* **2013**, *32*, 289-295. doi: <https://doi.org/10.1016/j.foodcont.2012.12.018>.
14. Balakrishnan, R.; Cho, D.-Y.; Su-Kim, I.; Choi, D.-K. *Dendropanax moribiferus* and other species from the genus *Dendropanax*: therapeutic potential of its traditional uses, phytochemistry, and pharmacology. *Antioxidants* **2020**, *9*, 962. doi: <https://doi.org/10.3390/antiox9100962>
15. Bueno, G.; Chavez Rico, S.L.; Périco, L.L.; Ohara, R.; Rodrigues, V.P.; Emílio-Silva, M.T.; Assunção, R.; Machado da Rocha, L.R.; Nunes, D.S.; Besten, M.A.; Heiden, G.; Lima Camargo, A.C.; Justulin, L.A.; Hiruma-Lima, C.A. The essential oil from *Baccharis trimera* (Less.) DC improves gastric ulcer healing in rats through modulation of VEGF and MMP-2 activity. *J Ethnopharmacol.* **2021**, *271*:113832. doi: 10.1016/j.jep.2021.113832.
16. Cazella, L.N.; Glamoclija, J.; Soković, M.; Gonçalves, J.E.; Linde, G.A.; Colauto, N.B.; Gazim, Z.C. Antimicrobial activity of essential oil of *Baccharis dracunculifolia* DC (Asteraceae) aerial parts at flowering period. *Front. Plant Sci.* **2019**, *10*, 27. doi: 10.3389/fpls.2019.00027

17. Zuccolotto, T.; Bressan, J.; Lourenço, A.V.F.; Bruginski, E.; Veiga, A.; Marinho, J.V.N.; Raeski, P.A.; Heiden, G.; Salvador, M.J.; Murakami, F.S.; Budel, J.M.; Campos, F.R. Chemical, antioxidant, and antimicrobial evaluation of essential oils and an anatomical study of the aerial parts from *Baccharis* species (Asteraceae). *Chem. Biodiv.* **2019**, 16, e1800547. doi: <https://doi.org/10.1002/cbdv.201800547>
18. Camargo, J.G.S.D. Desrepliação dos extratos de *Cyrtocymurascorpioides* (Asteraceae) contra *Candida* spp. e *Trichomonas vaginalis*. **2020**. MSc. dissertation, Instituto de Biociências, Letras e Ciências Exatas (IBILCE), UNESP, São José do Rio Preto, SP, Brazil. available at: <http://hdl.handle.net/11449/194314>
19. Santos, N.C.; Silva, J.E.D.; Santos, A.C.C.; Dantas, J.O.; Tavares, S.R.S.A.; Andrade, V.S.; Oliveira, S.D.D.S.; Blank, A.F.; Araújo, A.P.A.; Bacci, L. Bioactivity of essential oils from *Croton grewioides* and its major compounds: toxicity to soybean looper *Chrysodeixis includens* and selectivity to the predatory stink bug *Podisus nigrispinus*. *Environ Sci Pollut Res Int.* **2022**. doi: 10.1007/s11356-022-23414-w.
20. Silva, K.F.; Peruchetti, D.B.; Sirtoli, G.M.; Takiya, C.M.; Pinheiro, A.A.S.; Leal-Cardoso, J.H.; Caruso-Neves, C. High doses of essential oil of *Croton zehntneri* induces renal tubular damage. *Plants (Basel)* **2021**, 10, 1400. doi: 10.3390/plants10071400.
21. Almeida-Pereira, C.S.; Nogueira, P.C.L.; Barbosa, A.A.T.; Nizio, D.A.C.; Arrigoni-Blank, M.F.; Sampaio, T.S.; Alves, R.P.; de Araujo-Couto, H.G.S.; Feitosa-Alcantara, R.B.; de Melo, J.O.; Blank, A.F. Chemical composition and antimicrobial activity of essential oils of a *Croton tetradenius* Baill. germplasm. *J. Essent. Oil Res.* **2019**, 31, 379-389. doi: 10.1080/10412905.2019.1607785
22. Rocha, A.R.F.S.; Sousa, H.G.; do Vale Júnior, E.P.; de Lima, F.L.; Costa, A.S.G.; de Araújo, A.R.; Leite, J.R.S.A.; Martins, F.A.; Oliveira, M.B.P.P.; Plácido, A.; Filho, F.S.S.; Lago, E.C. Extracts and fractions of *Croton* L. (Euphorbiaceae) species with antimicrobial activity and antioxidant potential. *LWT* **2021**, 139, 110521. doi: <https://doi.org/10.1016/j.lwt.2020.110521>.
23. Silva, N.N.; Silva, J.R.; Alves, C.N.; Andrade, E.H.; da Silva, J.K.; Maia, J.G. Acetylcholinesterase inhibitory activity and molecular docking study of 1-nitro-2-phenylethane, the main constituent of *Anibacanelilla* essential oil. *Chem Biol Drug Des.* **2014**, 84, 192-8. doi: 10.1111/cbdd.12304.

24. da Silva, J.K.R.; da Trindade, R.C.S.; Maia, J.G.S.; Setzer, W.N. Chemical composition, antioxidant, and antimicrobial activities of essential oils of *Endlicheriaaarenosa* (Lauraceae) from the Amazon. *Nat. Prod. Commun.* **2016**, *11*, 695–698. doi: 10.1177/1934578X1601100537
25. de Moura, V.M.; Guimarães, N.C.; Batista, L.T.; Freitas-de-Sousa, L.A.; Martins, J.S.; de Souza, M.C.S.; de Almeida, P.D.O; Monteiro, W.M.; de Oliveira, R.B.; dos-Santos, M.C.; Mourão, R.H.V. Assessment of the anti-snakebite properties of extracts of *Anibafragrans*Ducke (Lauraceae) used in folk medicine as complementary treatment in cases of envenomation by *Bothropsatrox*, *J. Ethnopharmacol.* **2018**, *213*, 350-358. doi: <https://doi.org/10.1016/j.jep.2017.11.027>.
26. da Silva, Y.C.; Silva, E.M.S.; Fernandes, N.S.; Lopes, N.L.;Orlandi, P.P.; Nakamura, C.V.; Costa, E.V.; da VeigaJúnior, V.F. Antimicrobial substances from Amazonian *Aniba* (Lauraceae) species. *Nat. Prod. Res.* **2021**, *35*, 849-852. doi: 10.1080/14786419.2019.1603225
27. Xavier, J.K.A.M.; Alves, N.S.F.; Setzer, W.N.; da Silva, J.K.R. Chemical diversity and biological activities of essential oils from *Licaria*, *Nectrandra* and *Ocotea* species (Lauraceae) with occurrence in Brazilian biomes. *Biomolecules***2020**, *10*, 869. doi: <https://doi.org/10.3390/biom10060869>
28. Longhini, R.; Lonni, A.A.; Sereia, A.L.; Krzyzaniak, L.M.; Lopes, G.C.; Mello, J.C.P.D. *Trichiliacatigua*: therapeutic and cosmetic values. *Rev. Bras. Farmacog.* **2017**, *27*, 254-271. doi: <https://doi.org/10.1016/j.bjp.2016.10.005>
29. da Silva, L.L.; de Almeida R.; Silva, F.T.E.; Verícimo, M.A. Review on the therapeutic activities of the genus *Trichilia*. *Res. Soc. Dev.* **2021**, *10*, e29610514916. doi: 10.33448/rsd-v10i5.14916.
30. Cordeiro, R.M.; de S. e Silva, A.P.; Pinto, R.H.; da Costa, W.A.; da Silva, S.H.; de Souza Pinheiro, W.B.; Arruda, M.S.P.; Carvalho Junior, R.N. Supercritical CO<sub>2</sub> extraction of ucuúba (*Virolasurinamensis*) seed oil: global yield, kinetic data, fatty acid profile, and antimicrobial activities. *Chem. Eng. Commun.* **2019**, *206*, 86-97. doi: <https://doi.org/10.1080/00986445.2018.1474741>



31. González-Rodríguez, M.; Ruiz-Fernández, C.; Francisco, V.; AitEldjoudi, D.; FarragAbd-El-Hafez, Y.R.; Cordero-Barreal, A.; Pino, J.; Lago, F.; Campos-Toimil, M.; Rocha Carvalho, G.; Melo Costa Pereira, T.; Gualillo, O. Pharmacological extracts and molecules from *Viola* species: Traditional uses, phytochemistry, and biological activity. *Molecules* **2021**, *26*, 792. doi: <https://doi.org/10.3390/molecules26040792>
32. Ribeiro, C.L.; Silva, R.M.; Fernandes, R.D.M.N.; Araújo, M.R.; Soares, I.M.; da Silva, J.F.M.; do Nascimento, G.N.L.; Pimenta, R.S.; Scapin, E. Chemical assessment, antioxidant and antimicrobial of leaf extracts of *Virola sebifera*, an Amazonian medicinal plant. *Res. Soc. Dev.* **2021**, *10*, e578101523068-e578101523068. doi: <http://dx.doi.org/10.33448/rsd-v10i15.23068>
33. de Moraes, Â.A.B.; Ferreira, O.O.; da Costa, L.S.; Almeida, L.Q.; Varela, E.L.P.; Cascaes, M.M.; de Jesus Pereira Franco, C.; Percário, S.; Nascimento, L.D.D.; de Oliveira, M.S.; Andrade, E.H.A. Phytochemical profile, preliminary toxicity, and antioxidant capacity of the essential oils of *Myrciaria floribunda* (H. West ex Willd.) O. Berg. and *Myrcia sylvatica* (G. Mey) DC. (Myrtaceae). *Antioxidants* (Basel). **2022**, *11*, 2076. doi: [10.3390/antiox11102076](https://doi.org/10.3390/antiox11102076).
34. Magalhães, B.Q.; Machado, F.P.; Sanches, P.S.; Lima, B.; Falcão, D.Q.; von Ranke, N.; Bello, M.L.; Rodrigues, C.R.; Santos, M.G.; Rocha, L.; Faria, R.X. *Eugenia sulcata* (Myrtaceae) nanoemulsion enhances the inhibitory activity of the essential oil on P2X7R and inflammatory response *in vivo*. *Pharmaceutics* **2022**, *14*, 911. doi: [10.3390/pharmaceutics14050911](https://doi.org/10.3390/pharmaceutics14050911).
35. de Araújo, F.F.; Neri-Numa, I.A.; Farias, D.P.; Castro da Cunha, G.R.M.; Pastore, G.M. Wild Brazilian species of *Eugenia* genera (Myrtaceae) as an innovation hotspot for food and pharmacological purposes. *Food Res. Intl.* **2019**, *121*, 57-72. doi: <https://doi.org/10.1016/j.foodres.2019.03.018>.
36. Macedo, J.G.F.; Rangel, J.M.L.; de Oliveira Santos, M.; Camilo, C.J.; da Costa, J.G.M.; de Almeida Souza, M.M. Therapeutic indications, chemical composition and biological activity of native Brazilian species from *Psidium* genus (Myrtaceae): A review. *J. Ethnopharmacol.* **2021**, *278*, 114248. doi: <https://doi.org/10.1016/j.jep.2021.114248>

37. Vechi, G.; Tenfen, A.; Capusiri, E.S.; Gimenez, A.; Cechinel-Filho, V. Antiparasitic activity of two Brazilian plants: *Eugenia mattosii* and *Marlierea eugeniopsoides*. *Nat. Prod. Res.* **2021**, 35, 4876-4880. doi: <https://doi.org/10.1080/14786419.2020.1739676>
38. Maiolini, T.C.S.; Rosa, Miranda, D.W.O.; Costa-Silva, T.A.; Tempone, A.G.; Pires Bueno, P.C.; Ferreira Dias, D.; de Paula, D.A.C.; Sartorelli, P.; Lago, J.H.G.; Gomes Soares, M. Essential oils from different Myrtaceae species from Brazilian Atlantic Forest Biome – chemical dereplication and evaluation of antitrypanosomal activity. *Chem. Biodiv.* **2022**, 19, e202200198. doi: <https://doi.org/10.1002/cbdv.202200198>
39. de Oliveira, A.C.; Simões, R.C.; Lima, C.A.P.; da Silva, F.M.A.; Nunomura, S.M.; Roque, R.A.; Tadei, W.P.; Nunomura, R.C.S. Essential oil of *Piper purusanum* C.DC (Piperaceae) and its main sesquiterpenes: biodefensives against malaria and dengue vectors, without lethal effect on non-target aquatic fauna. *Environ Sci Pollut Res Int.* **2022**, 29, 47242-47253. doi: 10.1007/s11356-022-19196-w.
40. Zhang, C.; Zhao, J.; Famous, E.; Pan, S.; Peng, X.; Tian, J. Antioxidant, hepatoprotective and antifungal activities of black pepper (*Piper nigrum* L.) essential oil. *Food Chem.* **2021**, 346, 128845. doi: 10.1016/j.foodchem.2020.128845.
41. da Silva, J.K.; da Trindade, R.; Alves, N.S.; Figueiredo, P.L.; Maia, J.G.S.; Setzer, W.N. Essential oils from neotropical *Piper* species and their biological activities. *Intl. J. Mol. Sci.* **2017**, 18, 2571. doi: <https://doi.org/10.3390/ijms18122571>
42. de Pascoli, I.C.; dos Anjos, M.M.; da Silva, A.A.; Lorenzetti, F.B.; Cortez, D.A.G.; Mikcha, J.M.G.; Nakamura, T.U.; Nakamura, C.V.; de Abreu Filho, B.A. Piperaceae extracts for controlling *Alicyclobacillus acidoterrestris* growth in commercial orange juice. *Ind. Crops Prod.* **2018**, 116, 224-230. doi: <https://doi.org/10.1016/j.indcrop.2018.02.073>
43. Majolo, C.; Monteiro, P.C.; Nascimento, A.V.P.D.; Chaves, F.C.M.; Gama, P.E.; Bizzo, H.R.; Chagas, E.C. Essential oils from five Brazilian *Piper* species as antimicrobials against strains of *Aeromonashydrophila*. *J. Essent. Oil-Bear. Plants* **2019**, 22, 746-761. doi: <https://doi.org/10.1080/0972060X.2019.1645047>

44. dos Santos, A.L.M.; Araújo, F.A.M.; da Silva Matisui, É.; da Costa, L.A.M.A.; Macedo, A.J.; de Lucena, J.M.V.M. Antimicrobial and antibiofilm properties of essential oils from *Piper marginatum* Jacq.. *Res. Soc. Dev.* **2021**, 10, e514101119967-e514101119967. doi: 10.33448/rsd-v10i11.19967.
45. NavaeiShoorvarzi, S.; Shahraki, F.; Shafaei, N.; Karimi, E.; Oskoueian, E. *Citrus aurantium* L. bloom essential oil nanoemulsion: Synthesis, characterization, cytotoxicity, and its potential health impacts on mice. *J Food Biochem.* **2020**, 44, e13181. doi: 10.1111/jfbc.13181.
46. Volpato, G.T.; Francia-Farje, L.A.; Damasceno, D.C.; Oliveira, R.V.; Hiruma-Lima, C.A.; Kempinas, W.G. Effect of essential oil from *Citrus aurantium* in maternal reproductive outcome and fetal anomaly frequency in rats. *An Acad Bras Cienc.* **2015**, 87, 407-15. doi: 10.1590/0001-3765201520140354.
47. Orlanda, J.F.; Nascimento, A.R. Chemical composition and antibacterial activity of *Ruta graveolens* L. (Rutaceae) volatile oils, from São Luís, Maranhão, Brazil. *South African J. Bot.* **2015**, 99, 103-106. doi: <https://doi.org/10.1016/j.sajb.2015.03.198>
48. Fernandes, T.S.; Copetti, D.; Do Carmo, G.; Neto, A.T.; Pedroso, M.; Silva, U.F.; Mostardeiro, M.A.; Burrow, R.E.; Dalcol, I.I.; Morel, A.F. Phytochemical analysis of bark from *Helietta apiculata* Benth and antimicrobial activities. *Phytochemistry* **2017**, 141, 131-139. doi: <https://doi.org/10.1016/j.phytochem.2017.05.017>
49. Silva, F.B.D.; Santos, N.O.D.; Pascon, R.C.; Vallim, M.A.; Figueiredo, C.R.; Martins, R.C.C.; Sartorelli, P. Chemical composition and *in vitro* cytotoxic and antimicrobial activities of the essential oil from leaves of *Zanthoxylum monogynum* St. Hill (Rutaceae). *Medicines* **2017**, 4, 31. doi: <https://doi.org/10.3390/medicines4020031>
50. de Paula, R.C.; da Silva, S.M.; Faria, K.F.; Frézard, F.; de Souza Moreira, C.P.; Foubert, K.; Lopes, J.C.D.; Campana, P.R.V.; Rocha, M.P.; Silva, A.F.; Silva, C.G. In vitro antileishmanial activity of leaf and stem extracts of seven Brazilian plant species. *J. Ethnopharmacol.* **2019**, 232, 155-164. doi: <https://doi.org/10.1016/j.jep.2018.12.026>
51. Saraiva Filho, D.E.; Sousa, J.B.D.; Santos, H.S.D.; Fontenelle, R.O.D.S. Chemical compounds isolated from extracts and essential oils of the genus *Zanthoxylum* Linnaeus (Rutaceae) and its antimicrobial potential. *Hoehnea* **2020**, 47, e882019. doi: <https://doi.org/10.1590/2236-8906-88/2019>.

52. Silva, S.L.D., Chaar, J.D.S., Figueiredo, P.D.M.S. and Yano, T., 2008. Cytotoxic evaluation of essential oil from *Casearia sylvestris* Sw on human cancer cells and erythrocytes. *Acta Amazonica*, 38, pp.107-112.
53. Pereira, F.G.; Marquete, R.; Cruz, L.O.; Caldeira-de-Arujo, A.; Mansur, E.; de Lima Moreira, D. DNA damages promoted by the essential oil from leaves of *Casearia sylvestris* Sw. (Salicaceae). *J. Med. Plant Res.* **2016**, 10, 818-822. doi: <https://doi.org/10.5897/JMPR2016.6235>
54. Ribeiro, S.M.; Fratucelli, É.; Bueno, P.C.; de Castro, M.K.V.; Francisco, A.A.; Cavaleiro, A.J.; Klein, M.I. Antimicrobial and antibiofilm activities of *Casearia sylvestris* extracts from distinct Brazilian biomes against *Streptococcus mutans* and *Candida albicans*. *BMC Complement. Alt. Med.* **2019**, 19, 1-16. doi: <https://doi.org/10.1186/s12906-019-2717-z>.
55. de O. Ribeiro, I.C.; Mariano, E.G.A.; Careli, R.T.; Morais-Costa, F.; de Sant'Anna, F.M.; Pinto, M.S.; de Souza, M.R.; Duarte, E.R. Plants of the Cerrado with antimicrobial effects against *Staphylococcus* spp. and *Escherichia coli* from cattle. *BMC Vet. Res.* **2018**, 14, 1-10. doi: <https://doi.org/10.1186/s12917-018-1351-1>
56. da Cruz, J.E.R.; Saldanha, H.C.; Freitas, G.R.O.; Morais, E.R. A review of medicinal plants used in the Brazilian Cerrado for the treatment of fungal and bacterial infections. *J. Herb. Med.* **2022**, 31, p.100523. doi: <https://doi.org/10.1016/j.hermed.2021.100523>.
57. Barros, L.M.; Duarte, A.E.; Morais-Braga, M.F.; Waczuk, E.P.; Vega, C.; Leite, N.F.; de Menezes, I.R.; Coutinho, H.D.; Rocha, J.B.; Kamdem, J.P. Chemical Characterization and trypanocidal, leishmanicidal and cytotoxicity potential of *Lantana camara* L. (Verbenaceae) essential oil. *Molecules.* **2016**, 21(2):209. doi: [10.3390/molecules21020209](https://doi.org/10.3390/molecules21020209).
58. Postay, L.F.; Cabral, D.S.; Heringer, O.A.; Vieira, L.V.; de Moraes, L.R.; Freitas, G.; Gomes, L.C. The effectiveness of surfactants applied with essential oil of *Lippia alba* in the anesthesia of Nile tilapia (*Oreochromis niloticus*) and their toxicity assessment for fish and mammals. *Environ Sci Pollut Res Int.* **2021**, 28, 10224-10233. doi: [10.1007/s11356-020-11483-8](https://doi.org/10.1007/s11356-020-11483-8).

59. de Souza, R.C.; Da Costa, M.M.; Baldisserotto, B.; Heinzmann, B.M.; Schmidt, D.; Caron, B.O.; Copatti, C.E. Antimicrobial and synergistic activity of essential oils of *Aloysiatriphylla* and *Lippia alba* against *Aeromonas* spp.. *Microb. Pathog.* **2017**, 113, 29-33.  
<https://doi.org/10.1016/j.micpath.2017.10.013>.
60. Pérez Zamora, C.M.; Torres, C.A.; Nuñez, M.B. Antimicrobial activity and chemical composition of essential oils from Verbenaceae species growing in South America. *Molecules* **2018**, 23, 544. doi: <https://doi.org/10.3390/molecules23030544>
61. Nader, T.T.; Leonel, A.H.; Henrique, C.Y.; Contini, S.H.T.; Crevelin, E.J.; de Castro França, S.; Berton, B.W.; Pereira, A.M.S. Dynamized *Aloysiapolystachya* (Griseb.) essential oil: a promising antimicrobial product. *Homeopath.* **2022**. doi: 10.1055/s-0042-1748320
