# Supplementary material for: Essential Oils of Aromatic Plant Species from the Atlantic Rainforest Exhibit Extensive Chemical Diversity and Antimicrobial Activity
Source: Antibiotics (Basel). 2022 Dec 19;11(12):1844. doi: 10.3390/antibiotics11121844 (PMC9774909; doi:10.3390/antibiotics11121844)
Supplement: Supplementary file 1 [file antibiotics-11-01844-s001.zip]

Archive with 20 entries (20 files):
- FigureS1.jpg
- FigureS2.jpg
- FigureS3.jpg
- FigureS4.jpg
- FigureS5.jpg
- FigureS6a.jpg
- FigureS6b.jpg
- FigureS6c.jpg
- FigureS6d.jpg
- FigureS6e.jpg
- FigureS6f.jpg
- FigureS6g.jpg
- FigureS7.jpg
- Supplementary Material.pdf
- Table S6.pdf
- TableS1.xlsx
- TableS2.xlsx
- TableS3.xlsx
- TableS4.xlsx
- TableS5.xlsx
