# Supplementary material for: Essential Oils of Aromatic Plant Species from the Atlantic Rainforest Exhibit Extensive Chemical Diversity and Antimicrobial Activity
Source: Antibiotics (Basel). 2022 Dec 19;11(12):1844. doi: 10.3390/antibiotics11121844 (PMC9774909; doi:10.3390/antibiotics11121844)
Supplement: Supplementary file 1 [file antibiotics-11-01844-s001.zip › TableS1.xlsx]

## Sheet: completeTable
			Schinus terebinthifolius	Annona dioica	Guatteria australis	Xylopia aromatica	Xylopia brasiliensis	Monstera cf. adansonii	Dendropanax cuneatus			Baccharis dracunculifolia		Cyrtocymura scorpioides	Croton celtidifolius	Croton floribundus	Croton urucurana	Croton warmingii	Aiouea sp	Aniba viridis		Endlicheria paniculata	Nectandra megapotamica				Ocotea odorifera	Trichilia elegans	Virola bicuhyba	Calyptranthes lanceolata	Calyptranthes lucida	Campomanesia guavirota	Eugenia moraviana	Eugenia neoverrucosa	Eugenia prasina	Eugenia pyriformis	Eugenia myrcianthes	Marlierea exocoriata	Myrcia spectabilis	Myrcia splendens	Myrcia tomentosa	P. aduncum			P. amalago				P. amplum
			R1772	Lp06101603	R1598	Lp6101712	R1739	L52008	C010	Lp6101818	R1770	R1755	R1773	C005	Lp52912	R4167	R1768	R4165	R1736	R1746	Lp51907	R1622	Lp6101820	R1761	R1774	Lp052902	R1747	Lp6101709	Lp52003	R1745	Lp52009	Lp6101822	Lp06101816	R1626	Lp51905	C009	Lp6101714	Lp52006	Lp051901	C007	Lp06101817	Lp52911	Lp6101606	Lp6101608	Lp06091202	Lp06091206	R1763	Lp6101821	R1740
RIL	RIC	Compound	R1772/IAC 47521	Lp06101603/ IAC 47955	R1598/ IAC 46831	Lp6101712/ IAC 47969	R1739/ IAC 47266	L52008/ IAC 47079	C010/ IAC 47099	Lp6101818/ IAC 47975	R1770/ IAC 47519	R1755/ IAC 47282	R1773/ IAC 47522	C005/ IAC 47097	Lp52912/IAC 29030	R4167/ IAC 46976	R1768/ IAC 47517	R4165/ IAC 46974	R1736/ IAC 47263	R1746/ IAC 47273	Lp51907/ IAC 47071	R1622/ IAC 46801	Lp6101820/ IAC 47986	R1761/ IAC 47510	R1774/ IAC 47523	Lp052902/IAC 47084	R1747/ IAC 47274	Lp6101709/IAC 47961	Lp52003/ IAC 49465	R1745/IAC 47272	Lp52009/ IAC 47080	Lp6101822/ IAC 47988	Lp06101816/ IAC 47973	R1626/ IAC 46825	Lp51905/ IAC 47069	C009/ IAC 34660	Lp6101714/ IAC 47971	Lp52006/IAC 47077	Lp051901/IAC 47045	C007/ IAC 37365	Lp06101817/IAC 47974	Lp52911/IAC 47090	Lp6101606/IAC 47958	Lp6101608/IAC 47960	Lp06091202/IAC 32056	Lp06091206/IAC 46823	R1763/IAC 47512	Lp6101821/IAC 47987	R1740/IAC 7267
800	801	n-octane	−	−	−	−	−	−	−	−	−	−	−	−	−	0.41	−	−	−	−	−	−	−	−	−	−	−	−	−	−	−	−	−	−	−	−	−	−	−	−	−	-	-	-	-	-	-	-	-
926	925	tricyclene	−	−	−	−	−	−	−	−	−	−	−	−	−	−	0.27	0.18	−	−	−	−	−	−	−	−	−	−	−	−	−	−	−	−	−	−	−	−	−	−	−	-	-	-	-	-	-	-	-
930	925	α-thujene	−	−	−	−	−	−	0.82	tr	tr	−	−	−	−	−	−	−	−	−	−	−	−	−	−	−	−	−	−	−	−	−	−	−	−	−	−	3.32	−	−	−	-	-	-	-	0.21	-	-	tr
939	931	α-pinene	18.16	4.72	1.47	8.43	3.34	17.22	8.47	0.78	0.73	3.11	6.12	2.31	1.17	3.14	0.42	−	3.49	9.84	2.63	−	2.64	27.11	18.74	21.2	1.88	−	6.78	0.18	7.17	12.3	3.94	94.46	12.59	31.54	−	37.65	−	28.1	−	6.42	tr	0.08	14.75	6.67	11.67	4.83	18.09
952	942	α-fenchene	−	−	−	−	−	−	−	−	−	−	−	−	−	0.57	−	−	−	−	−	−	−	−	−	−	−	−	−	−	−	0.32	−	−	−	−	−	−	−	−	−	-	-	-	-	-	-	-	-
954	951	camphene	−	−	0.22	−	0.81	−	−	−	−	−	−	−	−	0.15	−	−	−	1.53	0.09	−	0.92	1.98	0.61	1.52	6.21	−	−	−	−	−	−	−	−	−	−	−	−	−	−	0.28	-	-	tr	tr	tr	tr	0.52
967	967	verbenene	−	−	−	−	−	−	−	−	−	−	−	−	5.46	−	−	−	−	−	−	−	−	1.37	0.7	0.71	−	−	−	−	−	−	−	−	−	−	−	−	−	−	−	-	-	-	-	-	-	-	-
975	968	sabinene	−	−	−	0.25	−	1.1	2.19	tr	tr	0.22	0.18	0.49	−	2.98	−	−	−	−	0.34	−	−	−	−	−	−	−	0.31	−	−	−	0.96	−	−	−	−	11.21	−	−	−	-	-	-	0.37	6.34	0.3	8.21	-
979	971	β-pinene	0.3	−	0.56	7.69	1.19	4.9	10.9	0.65	0.58	6.68	9.86	26.57	2.65	0.68	0.78	−	3.37	6.51	1.53	−	2.01	28.24	17.35	18.53	1.26	−	3.39	−	6.78	2.24	14.23	0.7	−	39.72	−	18.23	−	6.43	−	4.49	0.22	0.3	1.67	1.08	0.99	0.87	0.94
985	982	6-methyl-5-hepten-2-one	−	−	−	−	−	−	−	−	−	−	−	−	−	−	−	−	−	−	−	−	−	−	1.04	−	−	−	−	−	−	−	−	−	−	−	−	−	−	−	−	-	-	-	-	-	-	-	-
990	990	myrcene	3.01	−	−	0.94	−	2.16	tr	0.72	tr	1.81	3.14	1.02	6.25	−	0.71	−	1.99	0.42	0.29	−	−	1.07	1.21	1.11	1.68	−	−	−	−	2.14	−	−	0.43	1.26	−	3.81	−	−	−	tr	-	-	3.17	4.29	2.83	6.85	0.18
1002	1001	α-phellandrene	23.19	−	−	−	−	2.87	−	−	−	−	−	−	−	−	−	−	24.53	−	−	−	−	−	−	−	0.61	−	−	−	−	−	−	−	−	−	−	0.1	−	−	−	-	-	-	1.93	0.91	1.9	0.97	-
1004	1001	para-mentha-1 (7), 8-diene	−	−	−	−	−	−	−	−	−	−	−	−	−	−	−	−	−	−	−	−	−	−	−	−	−	−	−	−	−	−	−	−	1.22	−	−	−	−	−	−	-	-	-	-	-	-	-	-
1011	1008	δ-3-carene	−	−	−	−	−	−	tr	12.52	6.66	−	−	−	−	−	−	−	−	−	−	−	−	−	−	−	−	−	−	−	−	−	−	−	−	−	−	−	−	−	−	-	-	-	-	-	-	-	-
1017	1013	α-terpinene	−	−	−	−	−	−	−	−	−	−	−	−	−	−	−	−	−	−	−	−	−	−	−	−	−	−	−	−	−	−	−	−	−	−	−	0.78	−	−	−	-	-	-	-	tr	0.2	-	-
1024	1020	p-cymene	4.21	−	−	−	0.64	2.56	−	−	−	−	−	−	−	−	−	−	−	−	−	−	−	−	−	−	1.22	−	−	−	−	0.48	−	−	−	−	−	−	−	−	−	-	-	-	-	-	-	-	-
1026	1021	o-cymene	−	−	−	−	−	−	tr	0.27	1.74	−	−	−	8.31	−	−	−	7.71	−	0.16	−	−	−	−	−	−	−	−	−	−	-	−	−	0.53	−	−	0.42	−	−	−	-	-	-	1.04	0.48	0.85	tr	-
1029	1025	limonene	−	−	−	71.65	−	−	0.29	tr	1.5	11.58	17.38	2.63	−	−	0.12	−	−	−	0.73	−	1.71	4.26	5.48	3.42	8.12	−	1.65	−	0.22	5.07	−	1.24	61.42	2.85	−	5.49	−	−	−	1.27	-	-	-	-	-	-	8.62
1029	1025	β-phellandrene	16.85	−	−	−	−	36.62	−	−	−	−	−	−	−	−	−	−	1.83	−	−	−	−	−	−	−	−	−	−	−	−	−	−	−	−	−	−	−	−	−	−	-	-	-	39.29	15.92	33.13	12.29	-
1031	1027	1,8-cineole	-	−	−	−	11.11	−	−	−	−	−	−	−	−	1.9	−	−	−	−	−	−	−	−	−	−	−	−	−	−	−	−	−	−	−	−	−	−	−	−	−	-	-	-	-	-	-	-	-
1037	1037	cis-β-ocimene	−	−	−	−	−	−	−	−	−	−	−	−	−	−	−	−	0.54	−	−	−	1.42	−	−	−	−	−	−	−	−	−	−	−	−	−	−	−	−	−	−	1.03	0.68	1.87	0.84	1.36	1.89	1.57	10.46
1050	1049	trans-β-ocimene	−	6.02	−	−	−	−	−	−	−	0.26	0.19	1.02	−	−	−	−	0.49	−	−	−	9.15	−	−	−	−	−	−	−	−	−	−	−	−	0.91	0.11	6.45	−	−	−	2.73	1.92	4.95	Tr	0.48	0.47	0.37	1.52
1059	1055	γ-terpinene	−	−	−	−	−	−	−	−	−	−	−	−	−	−	−	−	−	−	0.37	−	−	−	−	−	−	−	−	−	−	0.24	−	−	−	−	−	1.54	−	−	−	tr	-	-	-	-	-	-	-
1088	1084	terpinolene	0.42	−	−	−	−	−	−	−	−	−	−	−	−	−	−	−	−	−	0.12	−	−	−	−	−	0.26	−	−	−	−	-	−	−	−	−	−	0.31	−	−	−	tr	-	-	-	-	-	-	-
1096	1096	linalool	−	−	−	−	−	−	−	−	−	0.4	0.85	−	−	−	−	8.11	−	3.93	11.09	−	−	−	−	−	0.86	−	−	−	−	11.8	−	−	−	−	0.89	−	−	−	−	2.22	-	-	0.7	1.32	0.78	1.86	-
1100	1101	n-nonanal	−	−	−	−	−	−	−	−	−	−	−	−	−	2.48	−	−	−	−	−	−	−	−	−	−	−	−	−	−	−	−	−	−	−	−	−	−	−	−	−	-	-	-	-	-	-	-	-
1126	1120	α-campholenal	−	−	−	−	1.4	−	−	−	−	−	−	−	−	−	−	−	−	−	−	−	−	−	−	−	−	−	−	−	−	−	−	−	−	−	−	−	−	−	−	-	-	-	-	-	-	-	-
1136	1131	cis-limonene oxide	−	−	−	−	−	−	tr	0.9	1.47	−	−	−	−	−	−	−	−	−	−	−	−	−	−	−	−	−	−	−	−	−	−	−	−	−	−	−	−	−	−	-	-	-	-	-	-	-	-
1140	1131	nopinone	−	−	−	−	2.11	−	−	−	−	−	−	−	−	−	−	−	−	−	−	−	−	−	−	−	−	−	−	−	−	−	−	−	−	−	−	−	−	−	−	-	-	-	-	-	-	-	-
1142	1133	trans-sabinol	−	−	−	−	5.97	−	−	−	−	−	−	−	−	−	−	−	−	−	−	−	−	−	−	−	−	−	−	−	−	−	−	−	−	−	−	−	−	−	−	-	-	-	-	-	-	-	-
1146	1139	camphor	−	−	−	−	−	−	−	−	−	−	−	−	−	−	−	−	−	−	−	−	−	−	−	−	50.54	−	−	−	−	−	−	−	−	−	−	−	−	−	−	-	-	-	-	-	-	-	-
1160	1161	isoborneol	−	−	−	−	−	−	−	−	−	−	−	−	−	−	−	−	−	−	−	−	−	−	−	−	−	−	−	−	−	1.16	−	−	−	−	−	−	−	−	−	-	-	-	-	-	-	-	-
1162	1154	trans-pinocamphone	−	−	−	−	0.44	−	−	−	−	−	−	−	−	−	−	−	−	−	−	−	−	−	−	−	−	−	−	−	−	−	−	−	−	−	−	−	−	−	−	-	-	-	-	-	-	-	-
1164	1155	pinocarvone	−	−	−	−	4.1	−	−	−	−	−	−	−	−	−	−	−	−	−	−	−	−	−	−	−	−	−	−	−	−	−	−	−	−	−	−	−	−	−	−	-	-	-	-	-	-	-	-
1169	1163	borneol	0.12	−	−	−	−	−	−	−	−	−	−	−	−	−	−	−	−	−	1.52	−	−	−	−	−	−	−	−	−	−	−	−	−	−	−	−	−	−	−	−	-	-	-	-	-	-	-	-
1177	1174	terpinen-4-ol	−	−	−	−	−	−	−	−	−	−	−	−	−	−	−	−	−	−	-	−	−	−	−	−	−	−	−	−	−	−	0.32	−	−	−	−	3.17	−	−	−	-	-	-	-	-	-	-	-
1188	1186	α-terpineol	−	−	−	−	−	−	−	−	−	−	−	−	−	−	−	−	−	−	0.33	−	−	−	0.41	−	0.82	−	−	−	−	4.46	−	−	−	0.58	-	0.19	−	−	−	-	-	-	-	-	-	-	-
1195	1189	myrtenal	−	−	−	−	3.78	−	−	−	−	−	−	−	−	−	−	−	−	−	−	−	−	−	−	−	−	−	−	−	−	−	−	−	−	−	−	−	−	−	−	-	-	-	-	-	-	-	-
1205	1201	verbenone	−	−	−	−	8.07	−	−	−	−	−	−	−	−	−	−	−	−	−	−	−	−	−	−	−	−	−	−	−	−	−	−	−	−	−	−	−	−	−	−	-	-	-	-	-	-	-	-
1243	1237	carvone	−	−	−	0.6	−	−	−	−	−	−	−	−	−	−	−	−	−	−	−	−	−	−	−	−	−	−	−	−	−	−	−	−	−	−	−	−	−	−	−	-	-	-	-	-	-	-	-
1252	1253	geraniol	−	−	−	0.39	−	−	−	−	−	−	−	−	−	−	−	−	−	−	−	−	−	−	−	−	−	−	−	−	−	−	−	−	−	−	−	−	−	−	−	-	-	-	-	-	-	-	-
1287	1281	safrole	−	−	−	−	−	−	−	−	−	−	−	−	−	−	−	−	−	−	−	−	−	−	−	−	1.02	−	−	−	−	−	−	−	−	−	−	−	−	−	−	13.28	10.83	10.51	-	-	-	-	-
1294	1289	2-undecanone	−	−	−	−	−	9.16	−	−	−	−	−	−	−	−	−	−	−	−	−	−	−	−	−	−	−	−	−	−	−	−	−	−	−	−	−	−	−	−	−	-	-	-	-	-	-	-	-
1324	1321	methyl geranate	−	−	−	−	−	−	−	−	−	−	−	−	−	−	−	−	−	−	−	−	−	−	−	−	−	−	−	−	−	−	−	−	−	−	−	−	−	−	−	-	-	-	-	-	-	-	-
1338	1338	δ-elemene	−	−	−	−	−	−	−	−	−	−	−	−	−	−	−	−	−	−	−	−	−	−	−	−	−	−	0.22	−	−	−	−	−	−	−	−	−	−	−	0.8	-	-	-	0.6	tr	1.73	1.54	-
1348	1350	α-cubebene	0.51	−	−	−	−	−	−	−	−	−	−	−	−	−	−	−	−	−	−	−	−	−	−	−	−	−	−	−	−	−	−	−	−	−	−	−	−	−	−	tr	-	-	-	-	-	-	-
1371	1366	cyclosativene	−	−	−	−	−	−	−	−	−	−	−	−	−	2.29	−	−	−	−	−	−	−	−	−	−	−	−	−	−	−	−	−	−	−	−	−	−	−	−	−	-	-	-	-	-	-	-	-
1376	1376	α-copaene	2.05	0.35	0.28	−	−	−	tr	tr	0.72	−	−	0.99	1.71	2.11	0.52	0.17	−	−	−	−	1.08	0.73	0.97	0.94	−	3.07	1.34	−	3.24	1.12	5.87	−	1.22	−	0.5	−	−	1.69	2.14	0.81	-	-	1.43	tr	tr	1.1	1.74
1388	1384	β-bourbonene	−	−	−	−	−	−	−	−	−	−	−	0.28	−	1.47	0.35	1.75	−	−	−	−	−	0.32	−	0.33	−	−	3.73	−	−	−	−	−	−	−	−	−	−	0.37	−	-	-	-	2.59	tr	tr	tr	tr
1388	1390	β-cubebene	2.56	0.22	−	−	−	−	−	−	−	−	−	−	−	−	−	−	−	−	−	−	−	−	−	−	−	−	−	−	−	−	−	−	−	−	−	−	−	−	−	-	-	-	-	-	-	tr	-
1390	1393	β-elemene	−	−	0.23	−	0.95	−	−	−	−	−	−	0.73	−	−	−	8.13	1.4	−	−	−	−	−	−	−	−	1.86	4.43	−	0.25	−	11.02	−	−	1.69	0.19	0.19	−	7.56	0.63	-	-	-	tr	0.25	0.24	1.21	tr
1403	1404	methyl eugenol	−	−	−	−	−	−	−	−	−	−	−	−	−	−	−	−	−	−	−	−	−	−	−	−	19.89	−	−	80.4	−	−	−	−	−	−	−	−	−	−	−	-	-	-	-	-	-	-	-
1409	1414	α-gurjunene	−	−	0.39	−	−	−	−	−	−	−	−	−	−	0.29	−	−	−	−	−	−	−	−	−	−	−	−	−	−	0.43	−	−	−	−	−	−	−	−	−	−	-	-	-	-	-	-	-	-
1412	1416	α-cis-bergamotene	−	−	−	−	−	−	−	−	−	−	−	−	−	2.04	−	−	−	−	−	−	−	−	−	−	−	−	−	−	−	−	−	−	−	−	−	−	−	−	−	-	-	-	-	-	-	-	-
1419	1417	trans-caryophyllene	0.61	12.2	5.52	−	−	1.52	13.24	18.38	5.65	2.12	1.03	7.16	9.1	21.97	5.23	16.8	5.48	1.33	−	8.24	5.67	3.11	0.49	1.93	−	0.37	18.11	0.61	16.88	6.49	16.19	0.72	5.18	2.01	4.71	1.05	−	5.12	20.41	3.64	0.36	0.54	2.76	2.36	2.08	3.62	8.82
1433	1429	β-gurjunene	−	−	−	−	−	−	−	−	−	−	−	0.8	−	5.2	−	0.21	−	−	−	−	−	−	−	−	−	−	0.41	−	0.17	−	−	−	−	−	−	−	−	−	−	tr	-	-	-	-	-	-	-
1436	1433	γ-elemene	−	−	−	−	−	−	−	−	−	−	−	−	−	−	−	−	−	−	−	−	−	−	−	−	−	1.22	−	−	−	−	−	−	−	−	−	−	−	−	−	-	-	-	tr	tr	tr	tr	-
1434	1440	α-trans-bergamotene	−	-	0.46	−	−	−	−	−	−	−	−	−	−	−	−	−	−	−	−	−	−	−	−	−	−	−	−	−	−	−	−	−	−	−	−	−	−	−	−	-	-	-	-	-	-	-	-
1439	1440	α-guaiene	−	−	−	−	−	−	−	−	−	−	−	−	−	−	−	−	−	−	−	−	−	−	−	−	−	−	−	−	−	−	1.14	−	−	−	−	−	−	−	−	-	-	-	-	-	-	-	-
1441	1440	aromadendrene	−	−	−	−	−	−	0.41	0.75	5.55	0.34	0.53	−	−	−	−	−	−	1.17	−	−	−	−	−	0.27	−	0.89	0.41	−	0.97	0.45	−	−	−	−	−	−	−	−	−	-	-	-	-	-	-	-	0.37
1454	1451	α-humulene	0.61	1.53	0.39	−	−	−	5.07	6.07	1.73	0.69	0.38	−	0.22	2.36	0.84	2.91	0.39	−	−	0.94	−	0.18	0.14	0.61	−	0.91	1.8	0.29	2.45	1.16	3.25	0.4	3.68	0.2	1.77	−	−	3.03	1.98	6.35	tr	0.09	tr	tr	tr	0.8	0.96
1456	1457	trans-β-farnesene	−	−	−	−	−	−	−	−	−	−	−	−	−	−	−	−	−	−	−	−	−	−	−	−	−	−	−	−	−	−	−	−	0.67	−	−	−	−	−	−	-	-	-	-	-	-	-	-
1460	1461	allo-aromadendrene	0.39	−	3.96	−	−	−	tr	0.72	1.51	−	−	−	−	0.61	1.08	−	0.58	0.97	−	−	1.3	0.72	−	1.23	−	−	−	−	0.86	−	0.68	−	−	−	0.22	−	−	−	−	-	-	-	-	-	-	-	-
1462	1462	dehydro-aromadendrene	−	−	−	−	−	−	tr	1.06	tr	−	−	1.18	−	−	−	−	−	−	−	−	−	−	−	−	−	−	0.68	−	−	−	−	−	−	−	−	−	−	−	−	0.31	-	-	tr	tr	tr	tr	tr
1477	1473	γ-gurjunene	−	−	−	−	−	−	0.54	tr	tr	−	−	−	−	−	−	0.3	−	−	−	−	−	−	−	−	−	−	−	−	−	2.05	−	−	−	−	−	−	−	−	−	0.39	-	-	tr	tr	tr	tr	tr
1479	1478	γ-muurolene	0.45	−	−	−	−	−	0.48	tr	1.68	−	−	0.66	−	0.54	−	6.69	−	−	−	11.8	0.14	0.17	−	0.3	−	−	0.74	−	0.27	−	2.1	−	−	3.35	−	−	−	−	0.6	-	-	-	tr	tr	tr	5.93	tr
1480	1481	ar-curcumene	-	−	7.7	−	−	−	−	−	−	−	−	−	−	−	−	−	−	−	−	−	−	−	−	−	−	−	−	−	−	−	−	−	0.24	−	−	−	−	−	−	-	-	-	-	-	-	-	-
1485	1481	germacrene D	8.36	21.04	−	−	−	−	tr	tr	9.21	3.17	1.57	36.14	11.7	9.02	23.96	−	0.65	−	−	−	8.07	4.43	−	9.76	−	2.61	8.18	−	0.91	3.88	7.25	−	−	−	4.16	0.59	−	20.92	33.09	0.77	0.92	0.55	11.72	tr	0.47	1.77	5.55
1490	1487	β-selinene	-	−	−	−	−	−	−	−	−	−	−	−	−	−	−	−	6.36	−	−	−	1.77	−	−	1.21	−	0.29	1.67	−	−	2.38	1.01	−	1.47	−	−	−	−	0.76	−	-	-	-	-	-	-	-	-
1492	1493	trans-methyl isoeugenol	-	−	−	−	−	−	−	−	−	−	−	−	−	−	−	−	−	−	−	−	−	−	−	-	−	−	−	4.14	−	−	−	−	−	−	−	−	−	−	−	-	-	-	-	-	-	-	-
1493	1493	cis-β-guaiene	−	−	3.71	−	−	−	−	−	−	−	−	8.02	−	0.7	−	−	3.05	−	−	−	−	−	−	−	−	−	21.42	−	−	−	−	−	−	−	−	−	−	−	−	tr	-	-	tr	tr	tr	tr	0.24
1495	1495	asaricin	−	−	−	−	−	−	−	−	−	−	−	−	−	−	−	−	−	−	−	−	−	−	−	−	−	−	−	−	−	−	−	−	−	−	−	−	−	−	−	14.86	80.08	73.36	-	-	-	-	-
1496	1492	2-tridecanone	-	−	−	−	−	17.04	−	−	−	−	−	−	−	−	−	−	−	−	−	−	−	−	−	−	−	−	−	−	−	−	−	−	−	−	−	−	−	−	−	-	-	-	-	-	-	-	-
1496	1495	valencene	−	−	−	−	−	−	4.98	tr	0.23	−	−	−	15.79	−	−	−	−	−	−	−	−	−	−	−	−	0.58	−	−	−	−	−	−	−	2.95	−	−	−	−	−	9.74	0.66	3.11	-	-	-	-	-
1498	1495	α-selinene	−	−	−	−	−	−	−	−	−	−	−	−	−	−	2.6	0.88	−	−	−	34.51	−	−	−	−	−	−	−	−	−	−	−	−	−	−	−	−	−	−	−	tr	-	-	tr	tr	tr	tr	tr
1499	1496	4-epi-cis-dihydroagarofuran	−	−	−	−	−	−	−	−	−	−	−	−	−	−	−	−	−	−	−	−	−	−	−	−	−	−	−	−	−	−	−	−	−	−	−	−	−	−	−	-	-	-	-	-	-	-	-
1500	1497	bicyclogermacrene	0.58	30.07	−	2.83	-	−	tr	15.74	32.84	4.33	2.7	−	−	3.94	43.42	17.42	6.15	−	−	−	23.43	16.43	6.4	22.71	−	−	−	1.43	12.43	−	9.09	−	−	−	8.51	−	−	−	10.4	tr	tr	tr	1.02	20.81	15.03	19.39	2.64
1500	1498	α-muurolene	0.41	−	0.83	−	−	−	0.24	tr	tr	0.41	0.49	−	−	1.44	−	−	−	−	−	−	−	−	−	−	−	−	0.86	−	0.24	0.78	1.08	−	−	−	0.36	−	−	−	1.53	0.62	tr	0.68	0.33	0.89	0.35	1.24	tr
1502	1498	trans-β-guaiene	0.17	−	−	−	−	−	−	−	−	−	−	−	0.23	−	−	−	−	8.14	0.35	−	−	−	−	−	−	−	−	−	−	−	−	−	−	−	−	2.31	−	0.77	−	-	-	-	-	-	-	-	-
1503	1500	β-dihydro agarofuran	−	−	−	−	−	−	−	−	−	−	−	−	−	−	−	−	−	−	−	−	−	−	−	−	−	−	−	−	−	−	−	−	−	−	−	−	−	−	−	-	-	-	-	-	-	-	-
1505	1505	(E,E)-α-farnesene	−	−	0.44	−	−	−	−	−	−	−	−	−	−	−	−	−	−	−	−	−	−	−	−	−	−	−	−	−	−	−	−	−	−	−	−	−	−	−	−	-	-	-	-	-	-	-	-
1505	1506	β-bisabolene	-	-	1.97	−	−	0.73	−	−	−	−	−	−	−	−	−	−	−	−	−	−	−	−	−	−	−	−	−	-	0.24	0.66	−	−	0.37	-	−	−	−	−	−	-	-	-	-	-	-	-	-
1507	1506	cis-α-bisabolene	−	−	−	−	−	−	−	−	−	−	−	−	−	−	−	−	−	−	−	−	−	−	−	−	−	−	−	−	−	−	−	−	−	−	−	−	−	−	−	-	-	-	-	-	-	-	-
1509	1507	germacrene A	−	0.58	-	−	−	−	−	−	−	−	−	−	−	0.3	−	7.35	1.1	−	−	−	−	−	−	−	−	1.01	3.18	−	−	−	5.31	−	−	0.71	−	−	−	5.82	−	-	tr	tr	tr	tr	tr	tr	1.15
1513	1515	γ-cadinene	0.23	0.58	0.31	−	−	−	0.96	tr	1.17	0.61	0.58	0.69	7.44	1.94	1.45	1.17	−	−	−	1.49	0.96	0.85	−	0.97	−	4.75	1.5	−	−	1.14	−	−	−	0.69	−	−	−	4.8	−	3.91	1.16	1.02	tr	1.03	1.08	1.26	tr
1522	1518	7-epi-α-selinene	−	−	−	−	−	−	−	−	−	−	−	−	−	−	0.55	−	−	−	−	−	−	−	−	−	−	−	−	−	−	−	−	−	−	−	−	−	−	−	−	-	-	-	-	-	-	-	-
1522	1523	E-calamenene	−	−	−	−	−	−	−	−	−	−	−	−	−	−	−	−	−	−	−	−	−	−	−	−	−	−	−	−	−	1.32	−	−	−	−	−	−	−	−	−	-	-	-	-	-	-	-	-
1523	1523	δ-cadinene	3.18	0.99	−	−	−	−	1.35	tr	2.26	2.32	2.9	1.58	1.52	0.94	2.29	0.98	−	−	0.52	1.1	2.03	0.43	−	2.1	−	2.25	2.66	−	4.24	5.51	1.62	−	1.68	−	1.41	0.44	−	1.78	7.02	2.62	0.22	0.31	0.72	4.6	1.9	3.6	0.87
1529	1523	cis-calamenene	−	−	−	−	−	−	tr	tr	0.41	−	−	−	−	−	−	−	−	−	−	−	−	−	−	−	−	−	−	−	−	−	−	−	−	−	−	−	−	−	−	-	-	-	-	-	-	-	-
1538	1537	α-cadinene	−	−	−	−	−	−	−	−	−	−	−	−	−	−	−	−	−	−	−	−	−	−	−	−	−	−	−	−	−	3.36	−	−	−	−	−	−	−	−	−	-	-	-	-	-	-	-	-
1545	1542	α-calacorene	−	−	−	−	−	−	−	−	−	−	−	−	−	−	−	−	−	−	−	−	−	−	−	−	−	1.65	−	−	0.3	−	−	−	0.45	−	−	−	−	−	−	-	-	-	-	-	-	-	-
1546	1543	selina-3,7 (11)-diene	−	−	−	−	−	−	−	−	−	−	−	−	−	−	−	−	−	−	−	−	−	−	−	−	−	−	−	−	−	4.2	−	−	−	−	−	−	−	−	−	-	-	-	-	-	-	-	-
1550	1543	α-agarofuran	−	−	−	−	−	−	−	−	−	−	−	−	−	−	−	−	−	−	−	−	−	−	−	−	−	−	−	−	−	−	−	−	−	−	−	−	−	−	−	-	-	-	-	-	-	-	-
1557	1554	elemicin	−	−	−	−	−	−	−	−	−	−	−	−	−	−	−	−	−	−	−	−	6.74	−	−	−	−	−	−	4.61	−	−	−	−	−	−	−	−	−	−	−	-	-	-	-	-	-	-	-
1561	1554	germacrene B	6.33	−	−	−	−	−	9.98	tr	tr	−	−	−	−	−	−	0.47	−	−	−	2.62	−	−	−	−	−	44.29	−	−	−	0.23	−	−	−	−	−	−	−	−	0.47	0.25	0.89	0.47	-	-	-	-	-
	1555	oxygenated sesquiterpene	−	−	−	−	−	−	−	−	−	−	−	−	−	−	−	−	−	−	−	−	−	−	28.09	−	−	−	−	−	−	−	−	−	−	−	−	−	−	−	−	-	-	-	-	-	-	-	-
1563	1568	trans-nerolidol	−	1.14	0.7	−	−	−	−	−	−	30.51	27.27	−	11.09	−	−	9.9	19.43	4.37	73.12	−	−	0.44	0.79	−	−	1.17	0.64	−	2.27	−	−	−	−	−	−	−	−	−	−	-	-	-	4.65	2.47	1.48	2.06	-
1578	1574	spathulenol	−	5.05	27.4	3.61	28.3	−	3.94	22.8	9.47	−	−	0.95	−	5.93	6.34	5.89	1.4	7.78	3.09	15.33	15.65	3.61	9.19	4.68	0.75	2.57	2.87	0.38	5.71	1.51	1.98	−	−	1.96	−	0.49	−	2.77	1.67	10.58	1.05	0.99	tr	9.07	9.77	5.58	-
1583	1579	caryophyllene oxide	−	−	18.77	−	3.47	−	15.6	9.07	5.56	−	−	−	−	13.74	−	2.65	0.81	2.67	-	8.58	7.37	1.49	−	−	−	−	−	−	17.27	3.65	3.76	−	−	2.57	−	-	−	−	1.07	3.63	-	-	tr	3	0.54	0.86	-
1590	1583	globulol	−	−	−	−	−	−	−	−	−	−	−	−	−	−	−	−	−	−	−	−	−	−	−	−	−	−	−	−	−	−	−	−	−	−	−	0.43	−	−	−	-	-	-	-	-	-	-	-
1590	1583	β-copaen-4-α-ol	−	−	−	−	−	−	−	−	−	12.03	6.2	−	−	−	−	−	−	−	0.63	−	−	−	−	−	−	0.67	−	−	−	−	−	−	−	−	31.72	−	−	−	−	-	-	-	-	-	-	-	-
1600	1596	guaiol	−	1.67	−	−	−	−	−	−	−	−	−	−	−	−	−	−	−	−	−	−	−	−	−	−	−	−	−	−	−	−	−	−	−	−	1.26	−	−	−	−	-	-	-	-	-	-	-	-
1604	1596	khusimone	−	−	−	−	−	−	−	−	−	−	−	−	−	−	0.6	−	−	−	−	−	−	−	−	−	−	−	−	−	−	−	−	−	−	−	−	−	−	−	−	-	-	-	-	-	-	-	-
1619	1617	1,10-di-epi-cubenol	−	−	−	−	−	−	−	−	−	−	−	−	−	−	−	−	−	−	−	−	−	−	−	−	−	5.17	−	−	−	−	−	−	−	−	−	−	−	−	−	-	-	-	-	-	-	-	-
1620	1617	dillapiole	−	−	−	−	−	−	−	−	−	−	−	−	−	−	−	−	−	−	−	−	−	−	−	−	−	−	−	−	−	−	−	−	−	−	−	−	−	−	−	-	-	-	-	-	-	-	-
1628	1629	1-epi-cubenol	−	−	−	−	−	−	−	−	−	0.44	0.6	−	−	−	−	−	−	−	−	−	−	−	−	−	−	−	−	−	−	−	−	−	0.51	−	−	0.17	−	−	1	-	-	-	1.63	0.45	2.6	0.78	-
1640	1637	epi-α-cadinol	1.13	−	−	−	−	−	−	−	−	1.92	2.73	−	1.92	−	3.15	−	−	−	0.37	−	−	−	−	−	−	−	−	−	−	−	0.68	−	−	1.09	−	−	−	−	4.35	1.75	-	-	0.21	4.15	1.19	1.73	tr
1658	1655	7-epi-a-eudesmol	−	−	−	−	−	−	−	−	−	−	−	−	−	−	−	−	−	−	−	−	−	−	−	−	−	−	−	−	−	1.19	−	−	−	−	−	−	−	−	−	-	-	-	-	-	-	-	-
1700	1697	eudesmol-7(11)-en-4-ol	−	−	−	−	−	−	−	−	−	−	−	−	−	−	1.75	−	−	−	−	−	−	−	−	−	−	−	−	−	−	−	−	−	−	−	−	−	−	−	−	-	-	-	-	-	-	-	-
1715	1711	cis-cis-farnesol	−	−	−	−	−	−	−	−	−	−	−	−	−	−	−	−	−	−	−	−	−	−	−	−	−	−	−	−	−	−	−	−	−	−	−	−	41.11	−	−	-	-	-	-	-	-	-	-
1742	1738	trans-cis-farnesol	−	−	−	−	−	−	−	−	−	−	−	−	−	−	−	−	−	−	−	−	−	−	−	−	−	−	−	−	−	−	−	−	−	−	−	−	52.1	−	−	-	-	-	-	-	-	-	-
1762	1760	benzyl benzoate	−	−	−	−	−	−	−	−	−	−	−	−	−	−	−	−	−	14.16	−	−	−	−	−	−	−	−	−	−	−	−	−	−	−	−	−	−	−	−	−	-	-	-	-	-	-	-	-
1865	1868	benzyl salicylate	−	−	−	−	−	−	−	−	−	−	−	−	−	−	−	−	−	23.42	−	−	−	−	−	−	−	−	−	−	−	−	−	−	−	−	−	−	−	−	−	-	-	-	-	-	-	-	-
		tr = trace metabolite (tr ≤ 0,05)
[truncated: 16 more columns]
