# Supplementary material for: Essential Oils of Aromatic Plant Species from the Atlantic Rainforest Exhibit Extensive Chemical Diversity and Antimicrobial Activity
Source: Antibiotics (Basel). 2022 Dec 19;11(12):1844. doi: 10.3390/antibiotics11121844 (PMC9774909; doi:10.3390/antibiotics11121844)
Supplement: Supplementary file 1 [file antibiotics-11-01844-s001.zip › TableS2.xlsx]

## Sheet: E coli
		Pearson´s r	p-value
Ecoli	linalool	0.135989	0.304427
Ecoli	camphene	-0.15759	0.233245
linalool	camphene	-0.0532704	0.688635
Ecoli	camphor	-0.089704	0.499262
linalool	camphor	-0.0303227	0.81966
camphene	camphor	0.529481	1.61799e-05
Ecoli	alpha_phellandrene	0.142996	0.279949
linalool	alpha_phellandrene	-0.0432556	0.744957
camphene	alpha_phellandrene	-0.043208	0.745228
camphor	alpha_phellandrene	-0.024595	0.853305
Ecoli	beta_phellandrene	0.0617375	0.642281
linalool	beta_phellandrene	-0.0837226	0.528411
camphene	beta_phellandrene	-0.0836304	0.528866
camphor	beta_phellandrene	-0.0476043	0.720317
alpha_phellandrene	beta_phellandrene	0.18018	0.172071
Ecoli	ortho_cymene	-0.127947	0.33418
linalool	ortho_cymene	-0.04325	0.744989
camphene	ortho_cymene	-0.0432025	0.74526
camphor	ortho_cymene	-0.0245918	0.853323
alpha_phellandrene	ortho_cymene	0.477534	0.000131044
beta_phellandrene	ortho_cymene	-0.0678993	0.609368
Ecoli	alpha_pinene	0.0438106	0.741798
linalool	alpha_pinene	-0.0581618	0.661705
camphene	alpha_pinene	0.0722277	0.586695
camphor	alpha_pinene	-0.114217	0.389035
alpha_phellandrene	alpha_pinene	0.0270335	0.838945
beta_phellandrene	alpha_pinene	0.162032	0.220168
ortho_cymene	alpha_pinene	-0.16291	0.217643
Ecoli	beta_pinene	-0.024106	0.85619
linalool	beta_pinene	-0.124224	0.34855
camphene	beta_pinene	-0.124087	0.349085
camphor	beta_pinene	-0.0706334	0.595002
alpha_phellandrene	beta_pinene	-0.100759	0.447661
beta_phellandrene	beta_pinene	-0.195023	0.13882
ortho_cymene	beta_pinene	-0.100746	0.447719
alpha_pinene	beta_pinene	0.355972	0.00565683
Ecoli	sabinene	0.0539562	0.684835
linalool	sabinene	-0.0431619	0.745491
camphene	sabinene	-0.0431144	0.745762
camphor	sabinene	-0.0245417	0.853619
alpha_phellandrene	sabinene	-0.0350089	0.792369
beta_phellandrene	sabinene	0.39734	0.00183259
ortho_cymene	sabinene	-0.0350044	0.792395
alpha_pinene	sabinene	-0.0455884	0.731706
beta_pinene	sabinene	-0.100541	0.44865
Ecoli	gamma_cadinene	-0.0651656	0.62388
linalool	gamma_cadinene	-0.0432477	0.745002
camphene	gamma_cadinene	-0.0432001	0.745273
camphor	gamma_cadinene	-0.0245905	0.853331
alpha_phellandrene	gamma_cadinene	-0.0350785	0.791965
beta_phellandrene	gamma_cadinene	-0.0678956	0.609388
ortho_cymene	gamma_cadinene	0.480667	0.000116596
alpha_pinene	gamma_cadinene	-0.162901	0.217668
beta_pinene	gamma_cadinene	-0.100741	0.447744
sabinene	gamma_cadinene	-0.0350025	0.792406
Ecoli	myrcene	0.0130304	0.921971
linalool	myrcene	-0.0601736	0.650748
camphene	myrcene	-0.0601074	0.651107
camphor	myrcene	-0.0342145	0.796979
alpha_phellandrene	myrcene	-0.0488072	0.71355
beta_phellandrene	myrcene	0.243042	0.0636228
ortho_cymene	myrcene	0.248243	0.0579883
alpha_pinene	myrcene	-0.0194997	0.883456
beta_pinene	myrcene	-0.140168	0.289668
sabinene	myrcene	0.277053	0.0336424
gamma_cadinene	myrcene	0.236923	0.0708056
Ecoli	delta_3_carene	0.0394316	0.766837
linalool	delta_3_carene	-0.0504914	0.704112
camphene	delta_3_carene	-0.0504358	0.704422
camphor	delta_3_carene	-0.0287092	0.829108
alpha_phellandrene	delta_3_carene	-0.0409539	0.758104
beta_phellandrene	delta_3_carene	-0.0792676	0.550655
ortho_cymene	delta_3_carene	-0.0409487	0.758134
alpha_pinene	delta_3_carene	0.0445106	0.737819
beta_pinene	delta_3_carene	-0.117614	0.374989
sabinene	delta_3_carene	-0.0408652	0.758612
gamma_cadinene	delta_3_carene	-0.0409465	0.758147
myrcene	delta_3_carene	0.533726	1.34273e-05
Ecoli	X1_8_cineole	-0.0417933	0.753301
linalool	X1_8_cineole	-0.0303227	0.81966
camphene	X1_8_cineole	-0.0302893	0.819855
camphor	X1_8_cineole	-0.0172414	0.896875
alpha_phellandrene	X1_8_cineole	-0.024595	0.853305
beta_phellandrene	X1_8_cineole	-0.0476043	0.720317
ortho_cymene	X1_8_cineole	-0.0245918	0.853323
alpha_pinene	X1_8_cineole	-0.114217	0.389035
beta_pinene	X1_8_cineole	-0.0706334	0.595002
sabinene	X1_8_cineole	-0.0245417	0.853619
gamma_cadinene	X1_8_cineole	-0.0245905	0.853331
myrcene	X1_8_cineole	-0.0342145	0.796979
delta_3_carene	X1_8_cineole	-0.0287092	0.829108
Ecoli	verbenone	-0.0896474	0.499534
linalool	verbenone	-0.0430074	0.746371
camphene	verbenone	-0.0429601	0.746641
camphor	verbenone	-0.0244538	0.854137
alpha_phellandrene	verbenone	-0.0348836	0.793096
beta_phellandrene	verbenone	-0.0675183	0.611382
ortho_cymene	verbenone	0.43328	0.000608445
alpha_pinene	verbenone	-0.161996	0.22027
beta_pinene	verbenone	-0.100181	0.450283
sabinene	verbenone	-0.034808	0.793534
gamma_cadinene	verbenone	0.415436	0.00106793
myrcene	verbenone	0.210834	0.108964
delta_3_carene	verbenone	-0.0407189	0.75945
X1_8_cineole	verbenone	0.773486	6.92779e-13
Ecoli	limonene	0.270266	0.0384305
linalool	limonene	0.0387908	0.770522
camphene	limonene	0.0568801	0.668721
camphor	limonene	0.211097	0.108512
alpha_phellandrene	limonene	-0.0700931	0.597829
beta_phellandrene	limonene	-0.135668	0.305584
ortho_cymene	limonene	-0.0700842	0.597876
alpha_pinene	limonene	0.0718463	0.588677
beta_pinene	limonene	0.084744	0.523374
sabinene	limonene	-0.0699413	0.598624
gamma_cadinene	limonene	-0.0700803	0.597896
myrcene	limonene	-0.0975078	0.462522
delta_3_carene	limonene	-0.0818183	0.537864
X1_8_cineole	limonene	-0.0491362	0.711703
verbenone	limonene	-0.069691	0.599937
Ecoli	cis_beta_ocimene	0.00611741	0.963323
linalool	cis_beta_ocimene	-0.0303227	0.81966
camphene	cis_beta_ocimene	-0.0302893	0.819855
camphor	cis_beta_ocimene	-0.0172414	0.896875
alpha_phellandrene	cis_beta_ocimene	-0.024595	0.853305
beta_phellandrene	cis_beta_ocimene	-0.0476043	0.720317
ortho_cymene	cis_beta_ocimene	-0.0245918	0.853323
alpha_pinene	cis_beta_ocimene	0.154651	0.242189
beta_pinene	cis_beta_ocimene	-0.0706334	0.595002
sabinene	cis_beta_ocimene	-0.0245417	0.853619
gamma_cadinene	cis_beta_ocimene	-0.0245905	0.853331
myrcene	cis_beta_ocimene	-0.0342145	0.796979
delta_3_carene	cis_beta_ocimene	-0.0287092	0.829108
X1_8_cineole	cis_beta_ocimene	-0.0172414	0.896875
verbenone	cis_beta_ocimene	-0.0244538	0.854137
limonene	cis_beta_ocimene	0.218522	0.0963633
Ecoli	trans_beta_ocimene	0.553529	5.43646e-06
linalool	trans_beta_ocimene	-0.0432529	0.744973
camphene	trans_beta_ocimene	-0.0432053	0.745244
camphor	trans_beta_ocimene	-0.0245934	0.853314
alpha_phellandrene	trans_beta_ocimene	-0.0350827	0.791941
beta_phellandrene	trans_beta_ocimene	-0.0679037	0.609345
ortho_cymene	trans_beta_ocimene	-0.0350782	0.791967
alpha_pinene	trans_beta_ocimene	-0.162921	0.217612
beta_pinene	trans_beta_ocimene	-0.100753	0.447689
sabinene	trans_beta_ocimene	-0.0350067	0.792382
gamma_cadinene	trans_beta_ocimene	-0.0350763	0.791978
myrcene	trans_beta_ocimene	-0.0488042	0.713567
delta_3_carene	trans_beta_ocimene	-0.0409514	0.758119
X1_8_cineole	trans_beta_ocimene	-0.0245934	0.853314
verbenone	trans_beta_ocimene	-0.0348814	0.793108
limonene	trans_beta_ocimene	0.25719	0.049245
cis_beta_ocimene	trans_beta_ocimene	-0.0245934	0.853314
Ecoli	germacreneA	0.0534306	0.687747
linalool	germacreneA	0.375306	0.00340068
camphene	germacreneA	-0.0430347	0.746216
camphor	germacreneA	-0.0244964	0.853887
alpha_phellandrene	germacreneA	-0.0349442	0.792744
beta_phellandrene	germacreneA	-0.0676357	0.610761
ortho_cymene	germacreneA	-0.0349398	0.79277
alpha_pinene	germacreneA	-0.162278	0.219459
beta_pinene	germacreneA	0.111757	0.399398
sabinene	germacreneA	-0.0348685	0.793183
gamma_cadinene	germacreneA	-0.0349379	0.792781
myrcene	germacreneA	-0.0486115	0.714649
delta_3_carene	germacreneA	-0.0407897	0.759045
X1_8_cineole	germacreneA	-0.0244964	0.853887
verbenone	germacreneA	-0.0347437	0.793907
limonene	germacreneA	-0.0698121	0.599302
cis_beta_ocimene	germacreneA	-0.0244964	0.853887
trans_beta_ocimene	germacreneA	-0.0349421	0.792757
Ecoli	germacreneB	0.0305445	0.818364
linalool	germacreneB	-0.0530652	0.689774
camphene	germacreneB	-0.0530068	0.690098
camphor	germacreneB	-0.0301727	0.820538
alpha_phellandrene	germacreneB	0.308801	0.017328
beta_phellandrene	germacreneB	0.0883904	0.505591
ortho_cymene	germacreneB	-0.0430361	0.746208
alpha_pinene	germacreneB	0.0523821	0.693569
beta_pinene	germacreneB	0.0504409	0.704394
sabinene	germacreneB	-0.0429483	0.746708
gamma_cadinene	germacreneB	-0.0430337	0.746221
myrcene	germacreneB	-0.0598759	0.652365
delta_3_carene	germacreneB	-0.0502416	0.705509
X1_8_cineole	germacreneB	-0.0301727	0.820538
verbenone	germacreneB	-0.0427946	0.747584
limonene	germacreneB	-0.085989	0.517267
cis_beta_ocimene	germacreneB	-0.0301727	0.820538
trans_beta_ocimene	germacreneB	-0.0430389	0.746192
germacreneA	germacreneB	-0.042869	0.74716
Ecoli	germacreneD	0.14316	0.279391
linalool	germacreneD	-0.158415	0.230777
camphene	germacreneD	-0.158241	0.231297
camphor	germacreneD	-0.0900743	0.497485
alpha_phellandrene	germacreneD	0.0282071	0.832053
beta_phellandrene	germacreneD	0.0903264	0.496278
ortho_cymene	germacreneD	0.0354723	0.789683
alpha_pinene	germacreneD	-0.240246	0.0668281
beta_pinene	germacreneD	-0.0945542	0.476252
sabinene	germacreneD	-0.128213	0.333166
gamma_cadinene	germacreneD	0.171922	0.192908
myrcene	germacreneD	0.0556067	0.675722
delta_3_carene	germacreneD	-0.0651859	0.623772
X1_8_cineole	germacreneD	-0.0900743	0.497485
verbenone	germacreneD	0.0153946	0.907871
limonene	germacreneD	-0.117147	0.376902
cis_beta_ocimene	germacreneD	0.0878769	0.508077
trans_beta_ocimene	germacreneD	0.244385	0.062127
germacreneA	germacreneD	0.00589097	0.96468
germacreneB	germacreneD	-0.0491819	0.711446
Ecoli	bicyclogermacrene	0.116266	0.380526
linalool	bicyclogermacrene	0.0118303	0.929138
camphene	bicyclogermacrene	-0.142357	0.282126
camphor	bicyclogermacrene	-0.0810327	0.541788
alpha_phellandrene	bicyclogermacrene	0.017159	0.897365
beta_phellandrene	bicyclogermacrene	0.0923443	0.486666
ortho_cymene	bicyclogermacrene	0.0136215	0.918443
alpha_pinene	bicyclogermacrene	-0.252546	0.053638
beta_pinene	bicyclogermacrene	-0.102501	0.439808
sabinene	bicyclogermacrene	0.321218	0.0131141
gamma_cadinene	bicyclogermacrene	-0.115573	0.383393
myrcene	bicyclogermacrene	-0.0336336	0.800354
delta_3_carene	bicyclogermacrene	0.131474	0.320914
X1_8_cineole	bicyclogermacrene	-0.0810327	0.541788
verbenone	bicyclogermacrene	-0.114931	0.386059
limonene	bicyclogermacrene	-0.230935	0.078448
cis_beta_ocimene	bicyclogermacrene	-0.0810327	0.541788
trans_beta_ocimene	bicyclogermacrene	0.137064	0.300586
germacreneA	bicyclogermacrene	0.255186	0.0511037
germacreneB	bicyclogermacrene	-0.141808	0.284003
germacreneD	bicyclogermacrene	0.27273	0.0366309
Ecoli	X1_10_di_epi_cubenol	-0.00346473	0.979222
linalool	X1_10_di_epi_cubenol	-0.0303227	0.81966
camphene	X1_10_di_epi_cubenol	-0.0302893	0.819855
camphor	X1_10_di_epi_cubenol	-0.0172414	0.896875
alpha_phellandrene	X1_10_di_epi_cubenol	-0.024595	0.853305
beta_phellandrene	X1_10_di_epi_cubenol	-0.0476043	0.720317
ortho_cymene	X1_10_di_epi_cubenol	-0.0245918	0.853323
alpha_pinene	X1_10_di_epi_cubenol	-0.114217	0.389035
beta_pinene	X1_10_di_epi_cubenol	-0.0706334	0.595002
sabinene	X1_10_di_epi_cubenol	-0.0245417	0.853619
gamma_cadinene	X1_10_di_epi_cubenol	0.715871	1.85572e-10
myrcene	X1_10_di_epi_cubenol	-0.0342145	0.796979
delta_3_carene	X1_10_di_epi_cubenol	-0.0287092	0.829108
X1_8_cineole	X1_10_di_epi_cubenol	-0.0172414	0.896875
verbenone	X1_10_di_epi_cubenol	-0.0244538	0.854137
limonene	X1_10_di_epi_cubenol	-0.0491362	0.711703
cis_beta_ocimene	X1_10_di_epi_cubenol	-0.0172414	0.896875
trans_beta_ocimene	X1_10_di_epi_cubenol	-0.0245934	0.853314
germacreneA	X1_10_di_epi_cubenol	-0.0244964	0.853887
germacreneB	X1_10_di_epi_cubenol	-0.0301727	0.820538
germacreneD	X1_10_di_epi_cubenol	0.105955	0.424466
bicyclogermacrene	X1_10_di_epi_cubenol	-0.0810327	0.541788
Ecoli	bulnesol	0.485225	9.81739e-05
linalool	bulnesol	-0.0303227	0.81966
camphene	bulnesol	-0.0302893	0.819855
camphor	bulnesol	-0.0172414	0.896875
alpha_phellandrene	bulnesol	-0.024595	0.853305
beta_phellandrene	bulnesol	-0.0476043	0.720317
ortho_cymene	bulnesol	-0.0245918	0.853323
alpha_pinene	bulnesol	-0.114217	0.389035
beta_pinene	bulnesol	-0.0706334	0.595002
sabinene	bulnesol	-0.0245417	0.853619
gamma_cadinene	bulnesol	-0.0245905	0.853331
myrcene	bulnesol	-0.0342145	0.796979
delta_3_carene	bulnesol	-0.0287092	0.829108
X1_8_cineole	bulnesol	-0.0172414	0.896875
verbenone	bulnesol	-0.0244538	0.854137
limonene	bulnesol	0.416293	0.00104018
cis_beta_ocimene	bulnesol	-0.0172414	0.896875
trans_beta_ocimene	bulnesol	0.690707	1.41442e-09
germacreneA	bulnesol	-0.0244964	0.853887
germacreneB	bulnesol	-0.0301727	0.820538
germacreneD	bulnesol	0.112602	0.395817
bicyclogermacrene	bulnesol	-0.0810327	0.541788
X1_10_di_epi_cubenol	bulnesol	-0.0172414	0.896875
Ecoli	cis_beta_guaiene	-0.0104101	0.937627
linalool	cis_beta_guaiene	-0.069528	0.600792
camphene	cis_beta_guaiene	-0.0694515	0.601194
camphor	cis_beta_guaiene	-0.0395334	0.766252
alpha_phellandrene	cis_beta_guaiene	-0.0563947	0.671387
beta_phellandrene	cis_beta_guaiene	-0.109154	0.410537
ortho_cymene	cis_beta_guaiene	0.272797	0.0365832
alpha_pinene	cis_beta_guaiene	-0.0312961	0.813973
beta_pinene	cis_beta_guaiene	0.141904	0.283676
sabinene	cis_beta_guaiene	-0.0562725	0.672058
gamma_cadinene	cis_beta_guaiene	0.260252	0.0465128
myrcene	cis_beta_guaiene	0.103917	0.433482
delta_3_carene	cis_beta_guaiene	-0.0658284	0.620348
X1_8_cineole	cis_beta_guaiene	-0.0395334	0.766252
verbenone	cis_beta_guaiene	0.231352	0.0778946
limonene	cis_beta_guaiene	-0.112666	0.395549
cis_beta_ocimene	cis_beta_guaiene	-0.0395334	0.766252
trans_beta_ocimene	cis_beta_guaiene	-0.0563912	0.671406
germacreneA	cis_beta_guaiene	-0.0561686	0.67263
germacreneB	cis_beta_guaiene	-0.069184	0.602599
germacreneD	cis_beta_guaiene	0.241107	0.0658277
bicyclogermacrene	cis_beta_guaiene	-0.185803	0.158852
X1_10_di_epi_cubenol	cis_beta_guaiene	-0.0395334	0.766252
bulnesol	cis_beta_guaiene	-0.0395334	0.766252
Ecoli	cis_cis_farnesol	-0.089704	0.499262
linalool	cis_cis_farnesol	-0.0303227	0.81966
camphene	cis_cis_farnesol	-0.0302893	0.819855
camphor	cis_cis_farnesol	-0.0172414	0.896875
alpha_phellandrene	cis_cis_farnesol	-0.024595	0.853305
beta_phellandrene	cis_cis_farnesol	-0.0476043	0.720317
ortho_cymene	cis_cis_farnesol	-0.0245918	0.853323
alpha_pinene	cis_cis_farnesol	-0.114217	0.389035
beta_pinene	cis_cis_farnesol	-0.0706334	0.595002
sabinene	cis_cis_farnesol	-0.0245417	0.853619
gamma_cadinene	cis_cis_farnesol	-0.0245905	0.853331
myrcene	cis_cis_farnesol	-0.0342145	0.796979
delta_3_carene	cis_cis_farnesol	-0.0287092	0.829108
X1_8_cineole	cis_cis_farnesol	-0.0172414	0.896875
verbenone	cis_cis_farnesol	-0.0244538	0.854137
limonene	cis_cis_farnesol	-0.0491362	0.711703
cis_beta_ocimene	cis_cis_farnesol	-0.0172414	0.896875
trans_beta_ocimene	cis_cis_farnesol	-0.0245934	0.853314
germacreneA	cis_cis_farnesol	-0.0244964	0.853887
germacreneB	cis_cis_farnesol	-0.0301727	0.820538
germacreneD	cis_cis_farnesol	-0.0900743	0.497485
bicyclogermacrene	cis_cis_farnesol	-0.0810327	0.541788
X1_10_di_epi_cubenol	cis_cis_farnesol	-0.0172414	0.896875
bulnesol	cis_cis_farnesol	-0.0172414	0.896875
cis_beta_guaiene	cis_cis_farnesol	-0.0395334	0.766252
Ecoli	trans_cis_farnesol	-0.089704	0.499262
linalool	trans_cis_farnesol	-0.0303227	0.81966
camphene	trans_cis_farnesol	-0.0302893	0.819855
camphor	trans_cis_farnesol	-0.0172414	0.896875
alpha_phellandrene	trans_cis_farnesol	-0.024595	0.853305
beta_phellandrene	trans_cis_farnesol	-0.0476043	0.720317
ortho_cymene	trans_cis_farnesol	-0.0245918	0.853323
alpha_pinene	trans_cis_farnesol	-0.114217	0.389035
beta_pinene	trans_cis_farnesol	-0.0706334	0.595002
sabinene	trans_cis_farnesol	-0.0245417	0.853619
gamma_cadinene	trans_cis_farnesol	-0.0245905	0.853331
myrcene	trans_cis_farnesol	-0.0342145	0.796979
delta_3_carene	trans_cis_farnesol	-0.0287092	0.829108
X1_8_cineole	trans_cis_farnesol	-0.0172414	0.896875
verbenone	trans_cis_farnesol	-0.0244538	0.854137
limonene	trans_cis_farnesol	-0.0491362	0.711703
cis_beta_ocimene	trans_cis_farnesol	-0.0172414	0.896875
trans_beta_ocimene	trans_cis_farnesol	-0.0245934	0.853314
germacreneA	trans_cis_farnesol	-0.0244964	0.853887
germacreneB	trans_cis_farnesol	-0.0301727	0.820538
germacreneD	trans_cis_farnesol	-0.0900743	0.497485
bicyclogermacrene	trans_cis_farnesol	-0.0810327	0.541788
X1_10_di_epi_cubenol	trans_cis_farnesol	-0.0172414	0.896875
bulnesol	trans_cis_farnesol	-0.0172414	0.896875
cis_beta_guaiene	trans_cis_farnesol	-0.0395334	0.766252
cis_cis_farnesol	trans_cis_farnesol	1	0
Ecoli	trans_beta_guaiene	-0.168575	0.20185
linalool	trans_beta_guaiene	-0.076103	0.566724
camphene	trans_beta_guaiene	-0.0760193	0.567152
camphor	trans_beta_guaiene	-0.0432719	0.744864
alpha_phellandrene	trans_beta_guaiene	0.218216	0.0968416
beta_phellandrene	trans_beta_guaiene	0.0471245	0.723022
ortho_cymene	trans_beta_guaiene	0.210733	0.109136
alpha_pinene	trans_beta_guaiene	-0.205031	0.119286
beta_pinene	trans_beta_guaiene	-0.0966604	0.466439
sabinene	trans_beta_guaiene	-0.061594	0.643056
gamma_cadinene	trans_beta_guaiene	0.276123	0.0342675
myrcene	trans_beta_guaiene	0.0764029	0.565192
delta_3_carene	trans_beta_guaiene	-0.0720535	0.5876
X1_8_cineole	trans_beta_guaiene	-0.0432719	0.744864
verbenone	trans_beta_guaiene	-0.0613735	0.644247
limonene	trans_beta_guaiene	-0.12332	0.352095
cis_beta_ocimene	trans_beta_guaiene	-0.0432719	0.744864
trans_beta_ocimene	trans_beta_guaiene	-0.0617239	0.642355
germacreneA	trans_beta_guaiene	-0.0614802	0.643671
germacreneB	trans_beta_guaiene	0.17261	0.191107
germacreneD	trans_beta_guaiene	-0.0204715	0.877692
bicyclogermacrene	trans_beta_guaiene	-0.132816	0.315957
X1_10_di_epi_cubenol	trans_beta_guaiene	0.42085	0.000903263
bulnesol	trans_beta_guaiene	-0.0432719	0.744864
cis_beta_guaiene	trans_beta_guaiene	-0.0992197	0.454664
cis_cis_farnesol	trans_beta_guaiene	-0.0432719	0.744864
trans_cis_farnesol	trans_beta_guaiene	-0.0432719	0.744864
Ecoli	trans_caryophyllene	0.0856036	0.519154
linalool	trans_caryophyllene	0.139356	0.292499
camphene	trans_caryophyllene	-0.171934	0.192877
camphor	trans_caryophyllene	-0.0978688	0.460859
alpha_phellandrene	trans_caryophyllene	0.00440074	0.973611
beta_phellandrene	trans_caryophyllene	-0.270221	0.038464
ortho_cymene	trans_caryophyllene	0.18984	0.149833
alpha_pinene	trans_caryophyllene	-0.242063	0.0647302
beta_pinene	trans_caryophyllene	-0.103853	0.433767
sabinene	trans_caryophyllene	-0.139308	0.292665
gamma_cadinene	trans_caryophyllene	0.198034	0.132706
myrcene	trans_caryophyllene	-0.0893562	0.500934
delta_3_carene	trans_caryophyllene	0.0780817	0.556651
X1_8_cineole	trans_caryophyllene	-0.0978688	0.460859
verbenone	trans_caryophyllene	0.0264537	0.842355
limonene	trans_caryophyllene	-0.167367	0.205146
cis_beta_ocimene	trans_caryophyllene	0.158258	0.231245
trans_beta_ocimene	trans_caryophyllene	0.0732443	0.581425
germacreneA	trans_caryophyllene	0.117676	0.374737
germacreneB	trans_caryophyllene	0.0141119	0.915518
germacreneD	trans_caryophyllene	0.366587	0.00429417
bicyclogermacrene	trans_caryophyllene	0.30364	0.0193927
X1_10_di_epi_cubenol	trans_caryophyllene	0.115837	0.382298
bulnesol	trans_caryophyllene	-0.0978688	0.460859
cis_beta_guaiene	trans_caryophyllene	0.242832	0.0638594
cis_cis_farnesol	trans_caryophyllene	-0.0978688	0.460859
trans_cis_farnesol	trans_caryophyllene	-0.0978688	0.460859
trans_beta_guaiene	trans_caryophyllene	0.0153779	0.90797
Ecoli	caryophyllene_oxide	0.0474037	0.721448
linalool	caryophyllene_oxide	-0.107251	0.41879
camphene	caryophyllene_oxide	-0.107133	0.419305
camphor	caryophyllene_oxide	-0.0609827	0.646362
alpha_phellandrene	caryophyllene_oxide	-0.0869923	0.512373
beta_phellandrene	caryophyllene_oxide	-0.168377	0.202388
ortho_cymene	caryophyllene_oxide	-0.0869812	0.512427
alpha_pinene	caryophyllene_oxide	-0.20269	0.123655
beta_pinene	caryophyllene_oxide	-0.0854851	0.519735
sabinene	caryophyllene_oxide	-0.0868039	0.51329
gamma_cadinene	caryophyllene_oxide	-0.0869765	0.51245
myrcene	caryophyllene_oxide	-0.121017	0.361233
delta_3_carene	caryophyllene_oxide	0.122749	0.354346
X1_8_cineole	caryophyllene_oxide	-0.0609827	0.646362
verbenone	caryophyllene_oxide	-0.0864932	0.514805
limonene	caryophyllene_oxide	-0.173795	0.188032
cis_beta_ocimene	caryophyllene_oxide	-0.0609827	0.646362
trans_beta_ocimene	caryophyllene_oxide	-0.0869869	0.512399
germacreneA	caryophyllene_oxide	-0.0866436	0.514072
germacreneB	caryophyllene_oxide	0.113159	0.393473
germacreneD	caryophyllene_oxide	-0.0421079	0.751504
bicyclogermacrene	caryophyllene_oxide	0.0695413	0.600722
X1_10_di_epi_cubenol	caryophyllene_oxide	-0.0609827	0.646362
bulnesol	caryophyllene_oxide	-0.0609827	0.646362
cis_beta_guaiene	caryophyllene_oxide	-0.00630442	0.962203
cis_cis_farnesol	caryophyllene_oxide	-0.0609827	0.646362
trans_cis_farnesol	caryophyllene_oxide	-0.0609827	0.646362
trans_beta_guaiene	caryophyllene_oxide	-0.0540171	0.684498
trans_caryophyllene	caryophyllene_oxide	0.507902	4.02065e-05
Ecoli	spathulenol	-0.018452	0.889678
linalool	spathulenol	-0.0464697	0.72672
camphene	spathulenol	-0.153386	0.246108
camphor	spathulenol	-0.087311	0.510823
alpha_phellandrene	spathulenol	-0.12455	0.347278
beta_phellandrene	spathulenol	-0.0961775	0.468679
ortho_cymene	spathulenol	-0.124534	0.34734
alpha_pinene	spathulenol	-0.439233	0.000500832
beta_pinene	spathulenol	-0.307203	0.0179462
sabinene	spathulenol	0.191135	0.147022
gamma_cadinene	spathulenol	-0.124527	0.347366
myrcene	spathulenol	-0.0908123	0.493954
delta_3_carene	spathulenol	0.121352	0.359893
X1_8_cineole	spathulenol	0.292301	0.0246734
verbenone	spathulenol	0.173938	0.187662
limonene	spathulenol	-0.248827	0.0573813
cis_beta_ocimene	spathulenol	-0.087311	0.510823
trans_beta_ocimene	spathulenol	0.0100699	0.939662
germacreneA	spathulenol	0.031693	0.811656
germacreneB	spathulenol	0.0324863	0.807032
germacreneD	spathulenol	0.0210502	0.874262
bicyclogermacrene	spathulenol	0.302604	0.0198314
X1_10_di_epi_cubenol	spathulenol	-0.087311	0.510823
bulnesol	spathulenol	-0.087311	0.510823
cis_beta_guaiene	spathulenol	-0.041068	0.757451
cis_cis_farnesol	spathulenol	-0.087311	0.510823
trans_cis_farnesol	spathulenol	-0.087311	0.510823
trans_beta_guaiene	spathulenol	0.0393915	0.767068
trans_caryophyllene	spathulenol	0.199944	0.128935
caryophyllene_oxide	spathulenol	0.422116	0.000868234
Ecoli	valencene	-0.089704	0.499262
linalool	valencene	-0.0303227	0.81966
camphene	valencene	-0.0302893	0.819855
camphor	valencene	-0.0172414	0.896875
alpha_phellandrene	valencene	-0.024595	0.853305
beta_phellandrene	valencene	-0.0476043	0.720317
ortho_cymene	valencene	-0.0245918	0.853323
alpha_pinene	valencene	0.0581237	0.661912
beta_pinene	valencene	-0.0706334	0.595002
sabinene	valencene	-0.0245417	0.853619
gamma_cadinene	valencene	-0.0245905	0.853331
myrcene	valencene	-0.0342145	0.796979
delta_3_carene	valencene	-0.0287092	0.829108
X1_8_cineole	valencene	-0.0172414	0.896875
verbenone	valencene	-0.0244538	0.854137
limonene	valencene	-0.0491362	0.711703
cis_beta_ocimene	valencene	-0.0172414	0.896875
trans_beta_ocimene	valencene	-0.0245934	0.853314
germacreneA	valencene	-0.0244964	0.853887
germacreneB	valencene	-0.0301727	0.820538
germacreneD	valencene	-0.0900743	0.497485
bicyclogermacrene	valencene	-0.0810327	0.541788
X1_10_di_epi_cubenol	valencene	-0.0172414	0.896875
bulnesol	valencene	-0.0172414	0.896875
cis_beta_guaiene	valencene	-0.0395334	0.766252
cis_cis_farnesol	valencene	-0.0172414	0.896875
trans_cis_farnesol	valencene	-0.0172414	0.896875
trans_beta_guaiene	valencene	-0.0432719	0.744864
trans_caryophyllene	valencene	-0.0978688	0.460859
caryophyllene_oxide	valencene	-0.0609827	0.646362
spathulenol	valencene	0.190827	0.147688
Ecoli	ar.curcumene	-0.00985283	0.94096
linalool	ar.curcumene	-0.0303227	0.81966
camphene	ar.curcumene	-0.0302893	0.819855
camphor	ar.curcumene	-0.0172414	0.896875
alpha_phellandrene	ar.curcumene	-0.024595	0.853305
beta_phellandrene	ar.curcumene	-0.0476043	0.720317
ortho_cymene	ar.curcumene	-0.0245918	0.853323
alpha_pinene	ar.curcumene	-0.114217	0.389035
beta_pinene	ar.curcumene	-0.0706334	0.595002
sabinene	ar.curcumene	-0.0245417	0.853619
gamma_cadinene	ar.curcumene	-0.0245905	0.853331
myrcene	ar.curcumene	-0.0342145	0.796979
delta_3_carene	ar.curcumene	-0.0287092	0.829108
X1_8_cineole	ar.curcumene	-0.0172414	0.896875
verbenone	ar.curcumene	-0.0244538	0.854137
limonene	ar.curcumene	-0.0491362	0.711703
cis_beta_ocimene	ar.curcumene	-0.0172414	0.896875
trans_beta_ocimene	ar.curcumene	-0.0245934	0.853314
germacreneA	ar.curcumene	-0.0244964	0.853887
germacreneB	ar.curcumene	-0.0301727	0.820538
germacreneD	ar.curcumene	-0.0900743	0.497485
bicyclogermacrene	ar.curcumene	-0.0810327	0.541788
X1_10_di_epi_cubenol	ar.curcumene	-0.0172414	0.896875
bulnesol	ar.curcumene	-0.0172414	0.896875
cis_beta_guaiene	ar.curcumene	-0.0395334	0.766252
cis_cis_farnesol	ar.curcumene	-0.0172414	0.896875
trans_cis_farnesol	ar.curcumene	-0.0172414	0.896875
trans_beta_guaiene	ar.curcumene	-0.0432719	0.744864
trans_caryophyllene	ar.curcumene	0.103122	0.437027
caryophyllene_oxide	ar.curcumene	0.323761	0.0123697
spathulenol	ar.curcumene	0.288631	0.0266233
valencene	ar.curcumene	-0.0172414	0.896875
Ecoli	junipene	-0.00985283	0.94096
linalool	junipene	-0.0303227	0.81966
camphene	junipene	-0.0302893	0.819855
camphor	junipene	-0.0172414	0.896875
alpha_phellandrene	junipene	-0.024595	0.853305
beta_phellandrene	junipene	-0.0476043	0.720317
ortho_cymene	junipene	-0.0245918	0.853323
alpha_pinene	junipene	-0.114217	0.389035
beta_pinene	junipene	-0.0706334	0.595002
sabinene	junipene	-0.0245417	0.853619
gamma_cadinene	junipene	-0.0245905	0.853331
myrcene	junipene	-0.0342145	0.796979
delta_3_carene	junipene	-0.0287092	0.829108
X1_8_cineole	junipene	-0.0172414	0.896875
verbenone	junipene	-0.0244538	0.854137
limonene	junipene	-0.0491362	0.711703
cis_beta_ocimene	junipene	-0.0172414	0.896875
trans_beta_ocimene	junipene	-0.0245934	0.853314
germacreneA	junipene	-0.0244964	0.853887
germacreneB	junipene	-0.0301727	0.820538
germacreneD	junipene	-0.0900743	0.497485
bicyclogermacrene	junipene	-0.0810327	0.541788
X1_10_di_epi_cubenol	junipene	-0.0172414	0.896875
bulnesol	junipene	-0.0172414	0.896875
cis_beta_guaiene	junipene	-0.0395334	0.766252
cis_cis_farnesol	junipene	-0.0172414	0.896875
trans_cis_farnesol	junipene	-0.0172414	0.896875
trans_beta_guaiene	junipene	-0.0432719	0.744864
trans_caryophyllene	junipene	0.103122	0.437027
caryophyllene_oxide	junipene	0.323761	0.0123697
spathulenol	junipene	0.288631	0.0266233
valencene	junipene	-0.0172414	0.896875
ar.curcumene	junipene	1	0
Ecoli	alpha_selinene	0.0574698	0.66549
linalool	alpha_selinene	0.250897	0.0552726
camphene	alpha_selinene	-0.0411917	0.756742
camphor	alpha_selinene	-0.0234473	0.86008
alpha_phellandrene	alpha_selinene	-0.0334477	0.801435
beta_phellandrene	alpha_selinene	-0.0647391	0.626157
ortho_cymene	alpha_selinene	-0.0334434	0.80146
alpha_pinene	alpha_selinene	-0.0463837	0.727206
beta_pinene	alpha_selinene	-0.0960573	0.469238
sabinene	alpha_selinene	-0.0333753	0.801857
gamma_cadinene	alpha_selinene	-0.0334416	0.801471
myrcene	alpha_selinene	-0.0465297	0.726381
delta_3_carene	alpha_selinene	-0.0390429	0.769072
X1_8_cineole	alpha_selinene	-0.0234473	0.86008
verbenone	alpha_selinene	-0.0332558	0.802551
limonene	alpha_selinene	0.0287586	0.828819
cis_beta_ocimene	alpha_selinene	-0.0234473	0.86008
trans_beta_ocimene	alpha_selinene	-0.0334456	0.801447
germacreneA	alpha_selinene	-0.0333136	0.802215
germacreneB	alpha_selinene	-0.0410331	0.757651
germacreneD	alpha_selinene	-0.122496	0.355349
bicyclogermacrene	alpha_selinene	-0.1102	0.406039
X1_10_di_epi_cubenol	alpha_selinene	-0.0234473	0.86008
bulnesol	alpha_selinene	-0.0234473	0.86008
cis_beta_guaiene	alpha_selinene	-0.0537631	0.685905
cis_cis_farnesol	alpha_selinene	-0.0234473	0.86008
trans_cis_farnesol	alpha_selinene	-0.0234473	0.86008
trans_beta_guaiene	alpha_selinene	-0.0588473	0.657963
trans_caryophyllene	alpha_selinene	0.191187	0.146909
caryophyllene_oxide	alpha_selinene	0.168558	0.201895
spathulenol	alpha_selinene	0.157691	0.232943
valencene	alpha_selinene	-0.0234473	0.86008
ar.curcumene	alpha_selinene	-0.0234473	0.86008
junipene	alpha_selinene	-0.0234473	0.86008
Ecoli	beta_selinene	-0.089704	0.499262
linalool	beta_selinene	-0.0303227	0.81966
camphene	beta_selinene	-0.0302893	0.819855
camphor	beta_selinene	-0.0172414	0.896875
alpha_phellandrene	beta_selinene	0.707381	3.77058e-10
beta_phellandrene	beta_selinene	-0.0476043	0.720317
ortho_cymene	beta_selinene	0.687798	1.76538e-09
alpha_pinene	beta_selinene	-0.114217	0.389035
beta_pinene	beta_selinene	-0.0706334	0.595002
sabinene	beta_selinene	-0.0245417	0.853619
gamma_cadinene	beta_selinene	-0.0245905	0.853331
myrcene	beta_selinene	-0.0342145	0.796979
delta_3_carene	beta_selinene	-0.0287092	0.829108
X1_8_cineole	beta_selinene	-0.0172414	0.896875
verbenone	beta_selinene	-0.0244538	0.854137
limonene	beta_selinene	-0.0491362	0.711703
cis_beta_ocimene	beta_selinene	-0.0172414	0.896875
trans_beta_ocimene	beta_selinene	-0.0245934	0.853314
germacreneA	beta_selinene	-0.0244964	0.853887
germacreneB	beta_selinene	-0.0301727	0.820538
germacreneD	beta_selinene	-0.0900743	0.497485
bicyclogermacrene	beta_selinene	0.103456	0.435535
X1_10_di_epi_cubenol	beta_selinene	-0.0172414	0.896875
bulnesol	beta_selinene	-0.0172414	0.896875
cis_beta_guaiene	beta_selinene	-0.0395334	0.766252
cis_cis_farnesol	beta_selinene	-0.0172414	0.896875
trans_cis_farnesol	beta_selinene	-0.0172414	0.896875
trans_beta_guaiene	beta_selinene	0.345771	0.00731005
trans_caryophyllene	beta_selinene	0.102266	0.440861
caryophyllene_oxide	beta_selinene	-0.0609827	0.646362
spathulenol	beta_selinene	-0.087311	0.510823
valencene	beta_selinene	-0.0172414	0.896875
ar.curcumene	beta_selinene	-0.0172414	0.896875
junipene	beta_selinene	-0.0172414	0.896875
alpha_selinene	beta_selinene	-0.0234473	0.86008
Ecoli	guaiol	-0.089704	0.499262
linalool	guaiol	-0.0303227	0.81966
camphene	guaiol	-0.0302893	0.819855
camphor	guaiol	-0.0172414	0.896875
alpha_phellandrene	guaiol	-0.024595	0.853305
beta_phellandrene	guaiol	-0.0476043	0.720317
ortho_cymene	guaiol	-0.0245918	0.853323
alpha_pinene	guaiol	0.112072	0.398061
beta_pinene	guaiol	0.217484	0.0979942
sabinene	guaiol	-0.0245417	0.853619
gamma_cadinene	guaiol	-0.0245905	0.853331
myrcene	guaiol	-0.0342145	0.796979
delta_3_carene	guaiol	-0.0287092	0.829108
X1_8_cineole	guaiol	-0.0172414	0.896875
verbenone	guaiol	-0.0244538	0.854137
limonene	guaiol	-0.0491362	0.711703
cis_beta_ocimene	guaiol	-0.0172414	0.896875
trans_beta_ocimene	guaiol	-0.0245934	0.853314
germacreneA	guaiol	-0.0244964	0.853887
germacreneB	guaiol	-0.0301727	0.820538
germacreneD	guaiol	0.142144	0.282851
bicyclogermacrene	guaiol	0.0850377	0.52193
X1_10_di_epi_cubenol	guaiol	-0.0172414	0.896875
bulnesol	guaiol	-0.0172414	0.896875
cis_beta_guaiene	guaiol	-0.0395334	0.766252
cis_cis_farnesol	guaiol	-0.0172414	0.896875
trans_cis_farnesol	guaiol	-0.0172414	0.896875
trans_beta_guaiene	guaiol	-0.0432719	0.744864
trans_caryophyllene	guaiol	0.143799	0.277228
caryophyllene_oxide	guaiol	-0.0609827	0.646362
spathulenol	guaiol	-0.087311	0.510823
valencene	guaiol	-0.0172414	0.896875
ar.curcumene	guaiol	-0.0172414	0.896875
junipene	guaiol	-0.0172414	0.896875
alpha_selinene	guaiol	-0.0234473	0.86008
beta_selinene	guaiol	-0.0172414	0.896875
Ecoli	beta_elemene	0.0555519	0.676023
linalool	beta_elemene	0.254399	0.0518491
camphene	beta_elemene	-0.0531834	0.689118
camphor	beta_elemene	-0.0302732	0.81995
alpha_phellandrene	beta_elemene	-0.0431849	0.74536
beta_phellandrene	beta_elemene	-0.0835859	0.529086
ortho_cymene	beta_elemene	-0.0431794	0.745391
alpha_pinene	beta_elemene	-0.200547	0.127761
beta_pinene	beta_elemene	0.0901626	0.497062
sabinene	beta_elemene	-0.0430914	0.745893
gamma_cadinene	beta_elemene	0.351829	0.00628387
myrcene	beta_elemene	-0.0600753	0.651281
delta_3_carene	beta_elemene	-0.050409	0.704573
X1_8_cineole	beta_elemene	-0.0302732	0.81995
verbenone	beta_elemene	-0.0429372	0.746772
limonene	beta_elemene	-0.0862755	0.515867
cis_beta_ocimene	beta_elemene	-0.0302732	0.81995
trans_beta_ocimene	beta_elemene	-0.0431823	0.745375
germacreneA	beta_elemene	0.834887	2.22045e-16
germacreneB	beta_elemene	-0.0529786	0.690255
germacreneD	beta_elemene	0.0815924	0.538991
bicyclogermacrene	beta_elemene	0.170041	0.197897
X1_10_di_epi_cubenol	beta_elemene	0.512383	3.345e-05
bulnesol	beta_elemene	-0.0302732	0.81995
cis_beta_guaiene	beta_elemene	-0.0694145	0.601388
cis_cis_farnesol	beta_elemene	-0.0302732	0.81995
trans_cis_farnesol	beta_elemene	-0.0302732	0.81995
trans_beta_guaiene	beta_elemene	0.171611	0.193727
trans_caryophyllene	beta_elemene	0.130932	0.322932
caryophyllene_oxide	beta_elemene	-0.107076	0.419554
spathulenol	beta_elemene	-0.0387866	0.770546
valencene	beta_elemene	-0.0302732	0.81995
ar.curcumene	beta_elemene	-0.0302732	0.81995
junipene	beta_elemene	-0.0302732	0.81995
alpha_selinene	beta_elemene	-0.0411698	0.756868
beta_selinene	beta_elemene	-0.0302732	0.81995
guaiol	beta_elemene	-0.0302732	0.81995
Ecoli	trans_yophyllene	0.101939	0.442334
linalool	trans_yophyllene	-0.0303227	0.81966
camphene	trans_yophyllene	-0.0302893	0.819855
camphor	trans_yophyllene	-0.0172414	0.896875
alpha_phellandrene	trans_yophyllene	-0.024595	0.853305
beta_phellandrene	trans_yophyllene	-0.0476043	0.720317
ortho_cymene	trans_yophyllene	-0.0245918	0.853323
alpha_pinene	trans_yophyllene	-0.114217	0.389035
beta_pinene	trans_yophyllene	0.25702	0.0494002
sabinene	trans_yophyllene	-0.0245417	0.853619
gamma_cadinene	trans_yophyllene	-0.0245905	0.853331
myrcene	trans_yophyllene	-0.0342145	0.796979
delta_3_carene	trans_yophyllene	-0.0287092	0.829108
X1_8_cineole	trans_yophyllene	-0.0172414	0.896875
verbenone	trans_yophyllene	-0.0244538	0.854137
limonene	trans_yophyllene	-0.0491362	0.711703
cis_beta_ocimene	trans_yophyllene	-0.0172414	0.896875
trans_beta_ocimene	trans_yophyllene	-0.0245934	0.853314
germacreneA	trans_yophyllene	0.634031	7.01006e-08
germacreneB	trans_yophyllene	-0.0301727	0.820538
germacreneD	trans_yophyllene	0.116714	0.378682
bicyclogermacrene	trans_yophyllene	0.144252	0.275703
X1_10_di_epi_cubenol	trans_yophyllene	-0.0172414	0.896875
bulnesol	trans_yophyllene	-0.0172414	0.896875
cis_beta_guaiene	trans_yophyllene	-0.0395334	0.766252
cis_cis_farnesol	trans_yophyllene	-0.0172414	0.896875
trans_cis_farnesol	trans_yophyllene	-0.0172414	0.896875
trans_beta_guaiene	trans_yophyllene	-0.0432719	0.744864
trans_caryophyllene	trans_yophyllene	-0.0978688	0.460859
caryophyllene_oxide	trans_yophyllene	-0.0609827	0.646362
spathulenol	trans_yophyllene	-0.087311	0.510823
valencene	trans_yophyllene	-0.0172414	0.896875
ar.curcumene	trans_yophyllene	-0.0172414	0.896875
junipene	trans_yophyllene	-0.0172414	0.896875
alpha_selinene	trans_yophyllene	-0.0234473	0.86008
beta_selinene	trans_yophyllene	-0.0172414	0.896875
guaiol	trans_yophyllene	-0.0172414	0.896875
beta_elemene	trans_yophyllene	0.634687	6.73072e-08
Ecoli	gamma_muurolene	-0.061084	0.645813
linalool	gamma_muurolene	0.150626	0.254812
camphene	gamma_muurolene	-0.0597445	0.653079
camphor	gamma_muurolene	-0.0340079	0.798179
alpha_phellandrene	gamma_muurolene	-0.0485125	0.715206
beta_phellandrene	gamma_muurolene	0.0196713	0.882438
ortho_cymene	gamma_muurolene	-0.0485063	0.71524
alpha_pinene	gamma_muurolene	-0.225288	0.0862398
beta_pinene	gamma_muurolene	-0.139321	0.292619
sabinene	gamma_muurolene	0.232607	0.0762503
gamma_cadinene	gamma_muurolene	-0.0485037	0.715255
myrcene	gamma_muurolene	0.0890322	0.502494
delta_3_carene	gamma_muurolene	-0.0566277	0.670107
X1_8_cineole	gamma_muurolene	-0.0340079	0.798179
verbenone	gamma_muurolene	-0.0482342	0.716771
limonene	gamma_muurolene	-0.096919	0.465242
cis_beta_ocimene	gamma_muurolene	-0.0340079	0.798179
trans_beta_ocimene	gamma_muurolene	-0.0485095	0.715222
germacreneA	gamma_muurolene	0.257737	0.0487476
germacreneB	gamma_muurolene	-0.0595144	0.65433
germacreneD	gamma_muurolene	-0.177668	0.178228
bicyclogermacrene	gamma_muurolene	0.0627754	0.636687
X1_10_di_epi_cubenol	gamma_muurolene	-0.0340079	0.798179
bulnesol	gamma_muurolene	-0.0340079	0.798179
cis_beta_guaiene	gamma_muurolene	-0.077978	0.557177
cis_cis_farnesol	gamma_muurolene	-0.0340079	0.798179
trans_cis_farnesol	gamma_muurolene	-0.0340079	0.798179
trans_beta_guaiene	gamma_muurolene	0.339026	0.0086222
trans_caryophyllene	gamma_muurolene	0.0614254	0.643967
caryophyllene_oxide	gamma_muurolene	0.0221831	0.867554
spathulenol	gamma_muurolene	0.31922	0.0137258
valencene	gamma_muurolene	-0.0340079	0.798179
ar.curcumene	gamma_muurolene	-0.0340079	0.798179
junipene	gamma_muurolene	-0.0340079	0.798179
alpha_selinene	gamma_muurolene	0.411978	0.00118677
beta_selinene	gamma_muurolene	-0.0340079	0.798179
guaiol	gamma_muurolene	-0.0340079	0.798179
beta_elemene	gamma_muurolene	0.165329	0.210796
trans_yophyllene	gamma_muurolene	-0.0340079	0.798179
Ecoli	alpha_humulene	0.421627	0.000881625
linalool	alpha_humulene	-0.0432549	0.744961
camphene	alpha_humulene	-0.0432073	0.745232
camphor	alpha_humulene	-0.0245946	0.853307
alpha_phellandrene	alpha_humulene	-0.0350843	0.791932
beta_phellandrene	alpha_humulene	-0.0679069	0.609328
ortho_cymene	alpha_humulene	-0.0350799	0.791957
alpha_pinene	alpha_humulene	-0.162929	0.217591
beta_pinene	alpha_humulene	-0.100758	0.447667
sabinene	alpha_humulene	-0.0350084	0.792372
gamma_cadinene	alpha_humulene	-0.035078	0.791969
myrcene	alpha_humulene	-0.0488065	0.713554
delta_3_carene	alpha_humulene	0.309543	0.0170472
X1_8_cineole	alpha_humulene	-0.0245946	0.853307
verbenone	alpha_humulene	-0.0348831	0.793099
limonene	alpha_humulene	0.265317	0.0422663
cis_beta_ocimene	alpha_humulene	-0.0245946	0.853307
trans_beta_ocimene	alpha_humulene	0.480394	0.000117791
germacreneA	alpha_humulene	-0.0349437	0.792747
germacreneB	alpha_humulene	-0.0430409	0.746181
germacreneD	alpha_humulene	0.017568	0.894933
bicyclogermacrene	alpha_humulene	0.0819983	0.536967
X1_10_di_epi_cubenol	alpha_humulene	-0.0245946	0.853307
bulnesol	alpha_humulene	0.708474	3.44655e-10
cis_beta_guaiene	alpha_humulene	-0.0563938	0.671392
cis_cis_farnesol	alpha_humulene	-0.0245946	0.853307
trans_cis_farnesol	alpha_humulene	-0.0245946	0.853307
trans_beta_guaiene	alpha_humulene	-0.0617267	0.642339
trans_caryophyllene	alpha_humulene	0.10215	0.441385
caryophyllene_oxide	alpha_humulene	0.118236	0.372453
spathulenol	alpha_humulene	0.126077	0.341353
valencene	alpha_humulene	-0.0245946	0.853307
ar.curcumene	alpha_humulene	-0.0245946	0.853307
junipene	alpha_humulene	-0.0245946	0.853307
alpha_selinene	alpha_humulene	-0.0334472	0.801438
beta_selinene	alpha_humulene	-0.0245946	0.853307
guaiol	alpha_humulene	-0.0245946	0.853307
beta_elemene	alpha_humulene	-0.0431843	0.745363
trans_yophyllene	alpha_humulene	-0.0245946	0.853307
gamma_muurolene	alpha_humulene	-0.0485118	0.71521
Ecoli	trans_nerolidol	-0.185835	0.158778
linalool	trans_nerolidol	0.396005	0.00190481
camphene	trans_nerolidol	-0.0887425	0.503891
camphor	trans_nerolidol	-0.0505143	0.703984
alpha_phellandrene	trans_nerolidol	0.196596	0.1356
beta_phellandrene	trans_nerolidol	-0.139473	0.29209
ortho_cymene	trans_nerolidol	0.410061	0.00125765
alpha_pinene	trans_nerolidol	-0.18393	0.163169
beta_pinene	trans_nerolidol	0.0795987	0.548987
sabinene	trans_nerolidol	-0.0719029	0.588383
gamma_cadinene	trans_nerolidol	0.140189	0.289595
myrcene	trans_nerolidol	0.0219953	0.868665
delta_3_carene	trans_nerolidol	-0.0841131	0.526482
X1_8_cineole	trans_nerolidol	-0.0505143	0.703984
verbenone	trans_nerolidol	0.121008	0.361265
limonene	trans_nerolidol	0.131038	0.322536
cis_beta_ocimene	trans_nerolidol	-0.0505143	0.703984
trans_beta_ocimene	trans_nerolidol	-0.0720545	0.587595
germacreneA	trans_nerolidol	0.151363	0.252469
germacreneB	trans_nerolidol	0.0834178	0.529918
germacreneD	trans_nerolidol	-0.196436	0.135926
bicyclogermacrene	trans_nerolidol	-0.0873854	0.510461
X1_10_di_epi_cubenol	trans_nerolidol	-0.0505143	0.703984
bulnesol	trans_nerolidol	-0.0505143	0.703984
cis_beta_guaiene	trans_nerolidol	0.0196379	0.882636
cis_cis_farnesol	trans_nerolidol	-0.0505143	0.703984
trans_cis_farnesol	trans_nerolidol	-0.0505143	0.703984
trans_beta_guaiene	trans_nerolidol	0.24195	0.0648595
trans_caryophyllene	trans_nerolidol	0.0461455	0.728553
caryophyllene_oxide	trans_nerolidol	-0.079133	0.551334
spathulenol	trans_nerolidol	-0.1248	0.346302
valencene	trans_nerolidol	-0.0505143	0.703984
ar.curcumene	trans_nerolidol	-0.0505143	0.703984
junipene	trans_nerolidol	-0.0505143	0.703984
alpha_selinene	trans_nerolidol	-0.0686965	0.605164
beta_selinene	trans_nerolidol	0.322841	0.0126348
guaiol	trans_nerolidol	-0.0505143	0.703984
beta_elemene	trans_nerolidol	0.0753742	0.570455
trans_yophyllene	trans_nerolidol	-0.0505143	0.703984
gamma_muurolene	trans_nerolidol	0.0125918	0.92459
alpha_humulene	trans_nerolidol	-0.0720579	0.587577
Ecoli	beta_copaen_4_alpha_ol	-0.122049	0.357122
linalool	beta_copaen_4_alpha_ol	-0.0604445	0.649278
camphene	beta_copaen_4_alpha_ol	-0.0603779	0.649639
camphor	beta_copaen_4_alpha_ol	-0.0343685	0.796085
alpha_phellandrene	beta_copaen_4_alpha_ol	-0.0490269	0.712316
beta_phellandrene	beta_copaen_4_alpha_ol	-0.0948932	0.474666
ortho_cymene	beta_copaen_4_alpha_ol	-0.0490207	0.712351
alpha_pinene	beta_copaen_4_alpha_ol	-0.166712	0.206951
beta_pinene	beta_copaen_4_alpha_ol	0.0679707	0.608991
sabinene	beta_copaen_4_alpha_ol	-0.0489207	0.712912
gamma_cadinene	beta_copaen_4_alpha_ol	-0.049018	0.712366
myrcene	beta_copaen_4_alpha_ol	-0.0682022	0.607769
delta_3_carene	beta_copaen_4_alpha_ol	-0.0572282	0.666813
X1_8_cineole	beta_copaen_4_alpha_ol	-0.0343685	0.796085
verbenone	beta_copaen_4_alpha_ol	-0.0487456	0.713896
limonene	beta_copaen_4_alpha_ol	0.182022	0.167654
cis_beta_ocimene	beta_copaen_4_alpha_ol	-0.0343685	0.796085
trans_beta_ocimene	beta_copaen_4_alpha_ol	-0.0490239	0.712333
germacreneA	beta_copaen_4_alpha_ol	-0.0488304	0.71342
germacreneB	beta_copaen_4_alpha_ol	0.234902	0.0733157
germacreneD	beta_copaen_4_alpha_ol	-0.179552	0.173595
bicyclogermacrene	beta_copaen_4_alpha_ol	-0.0119173	0.928618
X1_10_di_epi_cubenol	beta_copaen_4_alpha_ol	-0.0343685	0.796085
bulnesol	beta_copaen_4_alpha_ol	-0.0343685	0.796085
cis_beta_guaiene	beta_copaen_4_alpha_ol	-0.0788048	0.552991
cis_cis_farnesol	beta_copaen_4_alpha_ol	-0.0343685	0.796085
trans_cis_farnesol	beta_copaen_4_alpha_ol	-0.0343685	0.796085
trans_beta_guaiene	beta_copaen_4_alpha_ol	0.083821	0.527924
trans_caryophyllene	beta_copaen_4_alpha_ol	-0.195089	0.138683
caryophyllene_oxide	beta_copaen_4_alpha_ol	-0.121561	0.359059
spathulenol	beta_copaen_4_alpha_ol	-0.0471495	0.722881
valencene	beta_copaen_4_alpha_ol	-0.0343685	0.796085
ar.curcumene	beta_copaen_4_alpha_ol	-0.0343685	0.796085
junipene	beta_copaen_4_alpha_ol	-0.0343685	0.796085
alpha_selinene	beta_copaen_4_alpha_ol	-0.0467391	0.725198
beta_selinene	beta_copaen_4_alpha_ol	-0.0343685	0.796085
guaiol	beta_copaen_4_alpha_ol	-0.0343685	0.796085
beta_elemene	beta_copaen_4_alpha_ol	-0.0603458	0.649814
trans_yophyllene	beta_copaen_4_alpha_ol	-0.0343685	0.796085
gamma_muurolene	beta_copaen_4_alpha_ol	-0.0677904	0.609943
alpha_humulene	beta_copaen_4_alpha_ol	-0.0490261	0.71232
trans_nerolidol	beta_copaen_4_alpha_ol	0.383672	0.00270244
Ecoli	beta_gurjunene	-0.0258231	0.846067
linalool	beta_gurjunene	-0.0303227	0.81966
camphene	beta_gurjunene	-0.0302893	0.819855
camphor	beta_gurjunene	-0.0172414	0.896875
alpha_phellandrene	beta_gurjunene	-0.024595	0.853305
beta_phellandrene	beta_gurjunene	-0.0476043	0.720317
ortho_cymene	beta_gurjunene	-0.0245918	0.853323
alpha_pinene	beta_gurjunene	-0.114217	0.389035
beta_pinene	beta_gurjunene	-0.0706334	0.595002
sabinene	beta_gurjunene	-0.0245417	0.853619
gamma_cadinene	beta_gurjunene	-0.0245905	0.853331
myrcene	beta_gurjunene	-0.0342145	0.796979
delta_3_carene	beta_gurjunene	-0.0287092	0.829108
X1_8_cineole	beta_gurjunene	-0.0172414	0.896875
verbenone	beta_gurjunene	-0.0244538	0.854137
limonene	beta_gurjunene	-0.0491362	0.711703
cis_beta_ocimene	beta_gurjunene	-0.0172414	0.896875
trans_beta_ocimene	beta_gurjunene	-0.0245934	0.853314
germacreneA	beta_gurjunene	-0.0244964	0.853887
germacreneB	beta_gurjunene	-0.0301727	0.820538
germacreneD	beta_gurjunene	0.140667	0.287936
bicyclogermacrene	beta_gurjunene	-0.0810327	0.541788
X1_10_di_epi_cubenol	beta_gurjunene	-0.0172414	0.896875
bulnesol	beta_gurjunene	-0.0172414	0.896875
cis_beta_guaiene	beta_gurjunene	-0.0395334	0.766252
cis_cis_farnesol	beta_gurjunene	-0.0172414	0.896875
trans_cis_farnesol	beta_gurjunene	-0.0172414	0.896875
trans_beta_guaiene	beta_gurjunene	-0.0432719	0.744864
trans_caryophyllene	beta_gurjunene	0.265632	0.0420127
caryophyllene_oxide	beta_gurjunene	0.28283	0.0299686
spathulenol	beta_gurjunene	0.114827	0.386491
valencene	beta_gurjunene	-0.0172414	0.896875
ar.curcumene	beta_gurjunene	-0.0172414	0.896875
junipene	beta_gurjunene	-0.0172414	0.896875
alpha_selinene	beta_gurjunene	-0.0234473	0.86008
beta_selinene	beta_gurjunene	-0.0172414	0.896875
guaiol	beta_gurjunene	-0.0172414	0.896875
beta_elemene	beta_gurjunene	-0.0302732	0.81995
trans_yophyllene	beta_gurjunene	-0.0172414	0.896875
gamma_muurolene	beta_gurjunene	-0.0340079	0.798179
alpha_humulene	beta_gurjunene	-0.0245946	0.853307
trans_nerolidol	beta_gurjunene	-0.0505143	0.703984
beta_copaen_4_alpha_ol	beta_gurjunene	-0.0343685	0.796085
Ecoli	oxygenate_sesquiterpene	-0.089704	0.499262
linalool	oxygenate_sesquiterpene	-0.0303227	0.81966
camphene	oxygenate_sesquiterpene	-0.0302893	0.819855
camphor	oxygenate_sesquiterpene	-0.0172414	0.896875
alpha_phellandrene	oxygenate_sesquiterpene	-0.024595	0.853305
beta_phellandrene	oxygenate_sesquiterpene	-0.0476043	0.720317
ortho_cymene	oxygenate_sesquiterpene	-0.0245918	0.853323
alpha_pinene	oxygenate_sesquiterpene	0.191635	0.145947
beta_pinene	oxygenate_sesquiterpene	0.322489	0.0127375
sabinene	oxygenate_sesquiterpene	-0.0245417	0.853619
gamma_cadinene	oxygenate_sesquiterpene	-0.0245905	0.853331
myrcene	oxygenate_sesquiterpene	-0.0342145	0.796979
delta_3_carene	oxygenate_sesquiterpene	-0.0287092	0.829108
X1_8_cineole	oxygenate_sesquiterpene	-0.0172414	0.896875
verbenone	oxygenate_sesquiterpene	-0.0244538	0.854137
limonene	oxygenate_sesquiterpene	-0.0491362	0.711703
cis_beta_ocimene	oxygenate_sesquiterpene	-0.0172414	0.896875
trans_beta_ocimene	oxygenate_sesquiterpene	-0.0245934	0.853314
germacreneA	oxygenate_sesquiterpene	-0.0244964	0.853887
germacreneB	oxygenate_sesquiterpene	-0.0301727	0.820538
germacreneD	oxygenate_sesquiterpene	-0.0900743	0.497485
bicyclogermacrene	oxygenate_sesquiterpene	0.20326	0.12258
X1_10_di_epi_cubenol	oxygenate_sesquiterpene	-0.0172414	0.896875
bulnesol	oxygenate_sesquiterpene	-0.0172414	0.896875
cis_beta_guaiene	oxygenate_sesquiterpene	-0.0395334	0.766252
cis_cis_farnesol	oxygenate_sesquiterpene	-0.0172414	0.896875
trans_cis_farnesol	oxygenate_sesquiterpene	-0.0172414	0.896875
trans_beta_guaiene	oxygenate_sesquiterpene	-0.0432719	0.744864
trans_caryophyllene	oxygenate_sesquiterpene	-0.0978688	0.460859
caryophyllene_oxide	oxygenate_sesquiterpene	-0.0609827	0.646362
spathulenol	oxygenate_sesquiterpene	-0.087311	0.510823
valencene	oxygenate_sesquiterpene	-0.0172414	0.896875
ar.curcumene	oxygenate_sesquiterpene	-0.0172414	0.896875
junipene	oxygenate_sesquiterpene	-0.0172414	0.896875
alpha_selinene	oxygenate_sesquiterpene	-0.0234473	0.86008
beta_selinene	oxygenate_sesquiterpene	-0.0172414	0.896875
guaiol	oxygenate_sesquiterpene	-0.0172414	0.896875
beta_elemene	oxygenate_sesquiterpene	-0.0302732	0.81995
trans_yophyllene	oxygenate_sesquiterpene	-0.0172414	0.896875
gamma_muurolene	oxygenate_sesquiterpene	-0.0340079	0.798179
alpha_humulene	oxygenate_sesquiterpene	-0.0245946	0.853307
trans_nerolidol	oxygenate_sesquiterpene	-0.0505143	0.703984
beta_copaen_4_alpha_ol	oxygenate_sesquiterpene	-0.0343685	0.796085
beta_gurjunene	oxygenate_sesquiterpene	-0.0172414	0.896875
Ecoli	delta_cadinene	0.293582	0.024022
linalool	delta_cadinene	0.593603	7.22571e-07
camphene	delta_cadinene	-0.0302893	0.819855
camphor	delta_cadinene	-0.0172414	0.896875
alpha_phellandrene	delta_cadinene	-0.024595	0.853305
beta_phellandrene	delta_cadinene	-0.0476043	0.720317
ortho_cymene	delta_cadinene	-0.0245918	0.853323
alpha_pinene	delta_cadinene	0.118461	0.371535
beta_pinene	delta_cadinene	-0.0706334	0.595002
sabinene	delta_cadinene	-0.0245417	0.853619
gamma_cadinene	delta_cadinene	-0.0245905	0.853331
myrcene	delta_cadinene	-0.0342145	0.796979
delta_3_carene	delta_cadinene	-0.0287092	0.829108
X1_8_cineole	delta_cadinene	-0.0172414	0.896875
verbenone	delta_cadinene	-0.0244538	0.854137
limonene	delta_cadinene	0.155001	0.241114
cis_beta_ocimene	delta_cadinene	-0.0172414	0.896875
trans_beta_ocimene	delta_cadinene	-0.0245934	0.853314
germacreneA	delta_cadinene	-0.0244964	0.853887
germacreneB	delta_cadinene	-0.0301727	0.820538
germacreneD	delta_cadinene	-0.0900743	0.497485
bicyclogermacrene	delta_cadinene	-0.0810327	0.541788
X1_10_di_epi_cubenol	delta_cadinene	-0.0172414	0.896875
bulnesol	delta_cadinene	-0.0172414	0.896875
cis_beta_guaiene	delta_cadinene	-0.0395334	0.766252
cis_cis_farnesol	delta_cadinene	-0.0172414	0.896875
trans_cis_farnesol	delta_cadinene	-0.0172414	0.896875
trans_beta_guaiene	delta_cadinene	-0.0432719	0.744864
trans_caryophyllene	delta_cadinene	0.122168	0.356648
caryophyllene_oxide	delta_cadinene	-0.0609827	0.646362
spathulenol	delta_cadinene	-0.087311	0.510823
valencene	delta_cadinene	-0.0172414	0.896875
ar.curcumene	delta_cadinene	-0.0172414	0.896875
junipene	delta_cadinene	-0.0172414	0.896875
alpha_selinene	delta_cadinene	0.452845	0.000316616
beta_selinene	delta_cadinene	-0.0172414	0.896875
guaiol	delta_cadinene	-0.0172414	0.896875
beta_elemene	delta_cadinene	-0.0302732	0.81995
trans_yophyllene	delta_cadinene	-0.0172414	0.896875
gamma_muurolene	delta_cadinene	-0.0340079	0.798179
alpha_humulene	delta_cadinene	-0.0245946	0.853307
trans_nerolidol	delta_cadinene	-0.0505143	0.703984
beta_copaen_4_alpha_ol	delta_cadinene	-0.0343685	0.796085
beta_gurjunene	delta_cadinene	-0.0172414	0.896875
oxygenate_sesquiterpene	delta_cadinene	-0.0172414	0.896875
Ecoli	dihyidro_beta_agarofuran	-0.127939	0.334211
linalool	dihyidro_beta_agarofuran	-0.0432472	0.745005
camphene	dihyidro_beta_agarofuran	0.833507	2.22045e-16
camphor	dihyidro_beta_agarofuran	-0.0245902	0.853333
alpha_phellandrene	dihyidro_beta_agarofuran	-0.0350781	0.791968
beta_phellandrene	dihyidro_beta_agarofuran	-0.0678948	0.609392
ortho_cymene	dihyidro_beta_agarofuran	-0.0350736	0.791994
alpha_pinene	dihyidro_beta_agarofuran	0.159465	0.227663
beta_pinene	dihyidro_beta_agarofuran	-0.10074	0.447749
sabinene	dihyidro_beta_agarofuran	-0.0350021	0.792408
gamma_cadinene	dihyidro_beta_agarofuran	-0.0350717	0.792005
myrcene	dihyidro_beta_agarofuran	-0.0487978	0.713603
delta_3_carene	dihyidro_beta_agarofuran	-0.040946	0.758149
X1_8_cineole	dihyidro_beta_agarofuran	-0.0245902	0.853333
verbenone	dihyidro_beta_agarofuran	-0.0348769	0.793135
limonene	dihyidro_beta_agarofuran	-0.0700796	0.5979
cis_beta_ocimene	dihyidro_beta_agarofuran	-0.0245902	0.853333
trans_beta_ocimene	dihyidro_beta_agarofuran	-0.0350759	0.79198
germacreneA	dihyidro_beta_agarofuran	-0.0349375	0.792783
germacreneB	dihyidro_beta_agarofuran	-0.0430332	0.746224
germacreneD	dihyidro_beta_agarofuran	-0.128467	0.332203
bicyclogermacrene	dihyidro_beta_agarofuran	-0.115571	0.383398
X1_10_di_epi_cubenol	dihyidro_beta_agarofuran	-0.0245902	0.853333
bulnesol	dihyidro_beta_agarofuran	-0.0245902	0.853333
cis_beta_guaiene	dihyidro_beta_agarofuran	-0.0563838	0.671447
cis_cis_farnesol	dihyidro_beta_agarofuran	-0.0245902	0.853333
trans_cis_farnesol	dihyidro_beta_agarofuran	-0.0245902	0.853333
trans_beta_guaiene	dihyidro_beta_agarofuran	-0.0617158	0.642398
trans_caryophyllene	dihyidro_beta_agarofuran	-0.139584	0.291702
caryophyllene_oxide	dihyidro_beta_agarofuran	-0.0869755	0.512455
spathulenol	dihyidro_beta_agarofuran	-0.124526	0.347372
valencene	dihyidro_beta_agarofuran	-0.0245902	0.853333
ar.curcumene	dihyidro_beta_agarofuran	-0.0245902	0.853333
junipene	dihyidro_beta_agarofuran	-0.0245902	0.853333
alpha_selinene	dihyidro_beta_agarofuran	-0.0334412	0.801473
beta_selinene	dihyidro_beta_agarofuran	-0.0245902	0.853333
guaiol	dihyidro_beta_agarofuran	-0.0245902	0.853333
beta_elemene	dihyidro_beta_agarofuran	-0.0431766	0.745407
trans_yophyllene	dihyidro_beta_agarofuran	-0.0245902	0.853333
gamma_muurolene	dihyidro_beta_agarofuran	-0.0485032	0.715258
alpha_humulene	dihyidro_beta_agarofuran	-0.0350776	0.791971
trans_nerolidol	dihyidro_beta_agarofuran	-0.0720451	0.587644
beta_copaen_4_alpha_ol	dihyidro_beta_agarofuran	-0.0490174	0.712369
beta_gurjunene	dihyidro_beta_agarofuran	-0.0245902	0.853333
oxygenate_sesquiterpene	dihyidro_beta_agarofuran	-0.0245902	0.853333
delta_cadinene	dihyidro_beta_agarofuran	-0.0245902	0.853333
Ecoli	X10._epi_gamma_eudesmol	-0.127943	0.334196
linalool	X10._epi_gamma_eudesmol	-0.0432486	0.744997
camphene	X10._epi_gamma_eudesmol	0.830642	4.44089e-16
camphor	X10._epi_gamma_eudesmol	-0.024591	0.853328
alpha_phellandrene	X10._epi_gamma_eudesmol	-0.0350792	0.791961
beta_phellandrene	X10._epi_gamma_eudesmol	-0.067897	0.60938
ortho_cymene	X10._epi_gamma_eudesmol	-0.0350748	0.791987
alpha_pinene	X10._epi_gamma_eudesmol	0.159321	0.228088
beta_pinene	X10._epi_gamma_eudesmol	-0.100743	0.447734
sabinene	X10._epi_gamma_eudesmol	-0.0350032	0.792402
gamma_cadinene	X10._epi_gamma_eudesmol	-0.0350728	0.791998
myrcene	X10._epi_gamma_eudesmol	-0.0487993	0.713594
delta_3_carene	X10._epi_gamma_eudesmol	-0.0409473	0.758142
X1_8_cineole	X10._epi_gamma_eudesmol	-0.024591	0.853328
verbenone	X10._epi_gamma_eudesmol	-0.034878	0.793128
limonene	X10._epi_gamma_eudesmol	-0.0700818	0.597888
cis_beta_ocimene	X10._epi_gamma_eudesmol	-0.024591	0.853328
trans_beta_ocimene	X10._epi_gamma_eudesmol	-0.0350771	0.791974
germacreneA	X10._epi_gamma_eudesmol	-0.0349386	0.792777
germacreneB	X10._epi_gamma_eudesmol	-0.0430346	0.746216
germacreneD	X10._epi_gamma_eudesmol	-0.128471	0.332188
bicyclogermacrene	X10._epi_gamma_eudesmol	-0.115575	0.383383
X1_10_di_epi_cubenol	X10._epi_gamma_eudesmol	-0.024591	0.853328
bulnesol	X10._epi_gamma_eudesmol	-0.024591	0.853328
cis_beta_guaiene	X10._epi_gamma_eudesmol	-0.0563856	0.671437
cis_cis_farnesol	X10._epi_gamma_eudesmol	-0.024591	0.853328
trans_cis_farnesol	X10._epi_gamma_eudesmol	-0.024591	0.853328
trans_beta_guaiene	X10._epi_gamma_eudesmol	-0.0617177	0.642388
trans_caryophyllene	X10._epi_gamma_eudesmol	-0.139588	0.291687
caryophyllene_oxide	X10._epi_gamma_eudesmol	-0.0869783	0.512441
spathulenol	X10._epi_gamma_eudesmol	-0.12453	0.347356
valencene	X10._epi_gamma_eudesmol	-0.024591	0.853328
ar.curcumene	X10._epi_gamma_eudesmol	-0.024591	0.853328
junipene	X10._epi_gamma_eudesmol	-0.024591	0.853328
alpha_selinene	X10._epi_gamma_eudesmol	-0.0334423	0.801467
beta_selinene	X10._epi_gamma_eudesmol	-0.024591	0.853328
guaiol	X10._epi_gamma_eudesmol	-0.024591	0.853328
beta_elemene	X10._epi_gamma_eudesmol	-0.043178	0.745399
trans_yophyllene	X10._epi_gamma_eudesmol	-0.024591	0.853328
gamma_muurolene	X10._epi_gamma_eudesmol	-0.0485047	0.715249
alpha_humulene	X10._epi_gamma_eudesmol	-0.0350787	0.791964
trans_nerolidol	X10._epi_gamma_eudesmol	-0.0720474	0.587632
beta_copaen_4_alpha_ol	X10._epi_gamma_eudesmol	-0.049019	0.71236
beta_gurjunene	X10._epi_gamma_eudesmol	-0.024591	0.853328
oxygenate_sesquiterpene	X10._epi_gamma_eudesmol	-0.024591	0.853328
delta_cadinene	X10._epi_gamma_eudesmol	-0.024591	0.853328
dihyidro_beta_agarofuran	X10._epi_gamma_eudesmol	0.999131	0
Ecoli	X4_epi_cis_dihydro_agarofuran	-0.089704	0.499262
linalool	X4_epi_cis_dihydro_agarofuran	-0.0303227	0.81966
camphene	X4_epi_cis_dihydro_agarofuran	0.533891	1.33292e-05
camphor	X4_epi_cis_dihydro_agarofuran	-0.0172414	0.896875
alpha_phellandrene	X4_epi_cis_dihydro_agarofuran	-0.024595	0.853305
beta_phellandrene	X4_epi_cis_dihydro_agarofuran	-0.0476043	0.720317
ortho_cymene	X4_epi_cis_dihydro_agarofuran	-0.0245918	0.853323
alpha_pinene	X4_epi_cis_dihydro_agarofuran	0.109205	0.410316
beta_pinene	X4_epi_cis_dihydro_agarofuran	-0.0706334	0.595002
sabinene	X4_epi_cis_dihydro_agarofuran	-0.0245417	0.853619
gamma_cadinene	X4_epi_cis_dihydro_agarofuran	-0.0245905	0.853331
myrcene	X4_epi_cis_dihydro_agarofuran	-0.0342145	0.796979
delta_3_carene	X4_epi_cis_dihydro_agarofuran	-0.0287092	0.829108
X1_8_cineole	X4_epi_cis_dihydro_agarofuran	-0.0172414	0.896875
verbenone	X4_epi_cis_dihydro_agarofuran	-0.0244538	0.854137
limonene	X4_epi_cis_dihydro_agarofuran	-0.0491362	0.711703
cis_beta_ocimene	X4_epi_cis_dihydro_agarofuran	-0.0172414	0.896875
trans_beta_ocimene	X4_epi_cis_dihydro_agarofuran	-0.0245934	0.853314
germacreneA	X4_epi_cis_dihydro_agarofuran	-0.0244964	0.853887
germacreneB	X4_epi_cis_dihydro_agarofuran	-0.0301727	0.820538
germacreneD	X4_epi_cis_dihydro_agarofuran	-0.0900743	0.497485
bicyclogermacrene	X4_epi_cis_dihydro_agarofuran	-0.0810327	0.541788
X1_10_di_epi_cubenol	X4_epi_cis_dihydro_agarofuran	-0.0172414	0.896875
bulnesol	X4_epi_cis_dihydro_agarofuran	-0.0172414	0.896875
cis_beta_guaiene	X4_epi_cis_dihydro_agarofuran	-0.0395334	0.766252
cis_cis_farnesol	X4_epi_cis_dihydro_agarofuran	-0.0172414	0.896875
trans_cis_farnesol	X4_epi_cis_dihydro_agarofuran	-0.0172414	0.896875
trans_beta_guaiene	X4_epi_cis_dihydro_agarofuran	-0.0432719	0.744864
trans_caryophyllene	X4_epi_cis_dihydro_agarofuran	-0.0978688	0.460859
caryophyllene_oxide	X4_epi_cis_dihydro_agarofuran	-0.0609827	0.646362
spathulenol	X4_epi_cis_dihydro_agarofuran	-0.087311	0.510823
valencene	X4_epi_cis_dihydro_agarofuran	-0.0172414	0.896875
ar.curcumene	X4_epi_cis_dihydro_agarofuran	-0.0172414	0.896875
junipene	X4_epi_cis_dihydro_agarofuran	-0.0172414	0.896875
alpha_selinene	X4_epi_cis_dihydro_agarofuran	-0.0234473	0.86008
beta_selinene	X4_epi_cis_dihydro_agarofuran	-0.0172414	0.896875
guaiol	X4_epi_cis_dihydro_agarofuran	-0.0172414	0.896875
beta_elemene	X4_epi_cis_dihydro_agarofuran	-0.0302732	0.81995
trans_yophyllene	X4_epi_cis_dihydro_agarofuran	-0.0172414	0.896875
gamma_muurolene	X4_epi_cis_dihydro_agarofuran	-0.0340079	0.798179
alpha_humulene	X4_epi_cis_dihydro_agarofuran	-0.0245946	0.853307
trans_nerolidol	X4_epi_cis_dihydro_agarofuran	-0.0505143	0.703984
beta_copaen_4_alpha_ol	X4_epi_cis_dihydro_agarofuran	-0.0343685	0.796085
beta_gurjunene	X4_epi_cis_dihydro_agarofuran	-0.0172414	0.896875
oxygenate_sesquiterpene	X4_epi_cis_dihydro_agarofuran	-0.0172414	0.896875
delta_cadinene	X4_epi_cis_dihydro_agarofuran	-0.0172414	0.896875
dihyidro_beta_agarofuran	X4_epi_cis_dihydro_agarofuran	0.685405	2.1145e-09
X10._epi_gamma_eudesmol	X4_epi_cis_dihydro_agarofuran	0.715162	1.97086e-10
Ecoli	cubenol	-0.0577635	0.663882
linalool	cubenol	-0.0303227	0.81966
camphene	cubenol	-0.0302893	0.819855
camphor	cubenol	-0.0172414	0.896875
alpha_phellandrene	cubenol	-0.024595	0.853305
beta_phellandrene	cubenol	-0.0476043	0.720317
ortho_cymene	cubenol	-0.0245918	0.853323
alpha_pinene	cubenol	-0.114217	0.389035
beta_pinene	cubenol	-0.0706334	0.595002
sabinene	cubenol	-0.0245417	0.853619
gamma_cadinene	cubenol	-0.0245905	0.853331
myrcene	cubenol	-0.0342145	0.796979
delta_3_carene	cubenol	-0.0287092	0.829108
X1_8_cineole	cubenol	-0.0172414	0.896875
verbenone	cubenol	-0.0244538	0.854137
limonene	cubenol	-0.0491362	0.711703
cis_beta_ocimene	cubenol	-0.0172414	0.896875
trans_beta_ocimene	cubenol	-0.0245934	0.853314
germacreneA	cubenol	-0.0244964	0.853887
germacreneB	cubenol	-0.0301727	0.820538
germacreneD	cubenol	-0.0900743	0.497485
bicyclogermacrene	cubenol	0.136444	0.302799
X1_10_di_epi_cubenol	cubenol	-0.0172414	0.896875
bulnesol	cubenol	-0.0172414	0.896875
cis_beta_guaiene	cubenol	-0.0395334	0.766252
cis_cis_farnesol	cubenol	-0.0172414	0.896875
trans_cis_farnesol	cubenol	-0.0172414	0.896875
trans_beta_guaiene	cubenol	-0.0432719	0.744864
trans_caryophyllene	cubenol	-0.0978688	0.460859
caryophyllene_oxide	cubenol	-0.0609827	0.646362
spathulenol	cubenol	-0.087311	0.510823
valencene	cubenol	-0.0172414	0.896875
ar.curcumene	cubenol	-0.0172414	0.896875
junipene	cubenol	-0.0172414	0.896875
alpha_selinene	cubenol	-0.0234473	0.86008
beta_selinene	cubenol	-0.0172414	0.896875
guaiol	cubenol	-0.0172414	0.896875
beta_elemene	cubenol	-0.0302732	0.81995
trans_yophyllene	cubenol	-0.0172414	0.896875
gamma_muurolene	cubenol	-0.0340079	0.798179
alpha_humulene	cubenol	-0.0245946	0.853307
trans_nerolidol	cubenol	-0.0505143	0.703984
beta_copaen_4_alpha_ol	cubenol	0.665434	8.94213e-09
beta_gurjunene	cubenol	-0.0172414	0.896875
oxygenate_sesquiterpene	cubenol	-0.0172414	0.896875
delta_cadinene	cubenol	-0.0172414	0.896875
dihyidro_beta_agarofuran	cubenol	-0.0245902	0.853333
X10._epi_gamma_eudesmol	cubenol	-0.024591	0.853328
X4_epi_cis_dihydro_agarofuran	cubenol	-0.0172414	0.896875
Ecoli	beta_bourbonene	-0.089704	0.499262
linalool	beta_bourbonene	-0.0303227	0.81966
camphene	beta_bourbonene	-0.0302893	0.819855
camphor	beta_bourbonene	-0.0172414	0.896875
alpha_phellandrene	beta_bourbonene	-0.024595	0.853305
beta_phellandrene	beta_bourbonene	-0.0476043	0.720317
ortho_cymene	beta_bourbonene	-0.0245918	0.853323
alpha_pinene	beta_bourbonene	-0.114217	0.389035
beta_pinene	beta_bourbonene	-0.0706334	0.595002
sabinene	beta_bourbonene	-0.0245417	0.853619
gamma_cadinene	beta_bourbonene	-0.0245905	0.853331
myrcene	beta_bourbonene	-0.0342145	0.796979
delta_3_carene	beta_bourbonene	-0.0287092	0.829108
X1_8_cineole	beta_bourbonene	-0.0172414	0.896875
verbenone	beta_bourbonene	-0.0244538	0.854137
limonene	beta_bourbonene	-0.0491362	0.711703
cis_beta_ocimene	beta_bourbonene	-0.0172414	0.896875
trans_beta_ocimene	beta_bourbonene	-0.0245934	0.853314
germacreneA	beta_bourbonene	-0.0244964	0.853887
germacreneB	beta_bourbonene	-0.0301727	0.820538
germacreneD	beta_bourbonene	-0.0900743	0.497485
bicyclogermacrene	beta_bourbonene	-0.0810327	0.541788
X1_10_di_epi_cubenol	beta_bourbonene	-0.0172414	0.896875
bulnesol	beta_bourbonene	-0.0172414	0.896875
cis_beta_guaiene	beta_bourbonene	-0.0395334	0.766252
cis_cis_farnesol	beta_bourbonene	-0.0172414	0.896875
trans_cis_farnesol	beta_bourbonene	-0.0172414	0.896875
trans_beta_guaiene	beta_bourbonene	0.551124	6.08634e-06
trans_caryophyllene	beta_bourbonene	-0.0978688	0.460859
caryophyllene_oxide	beta_bourbonene	-0.0609827	0.646362
spathulenol	beta_bourbonene	0.172337	0.191822
valencene	beta_bourbonene	-0.0172414	0.896875
ar.curcumene	beta_bourbonene	-0.0172414	0.896875
junipene	beta_bourbonene	-0.0172414	0.896875
alpha_selinene	beta_bourbonene	-0.0234473	0.86008
beta_selinene	beta_bourbonene	-0.0172414	0.896875
guaiol	beta_bourbonene	-0.0172414	0.896875
beta_elemene	beta_bourbonene	-0.0302732	0.81995
trans_yophyllene	beta_bourbonene	-0.0172414	0.896875
gamma_muurolene	beta_bourbonene	0.692268	1.25444e-09
alpha_humulene	beta_bourbonene	-0.0245946	0.853307
trans_nerolidol	beta_bourbonene	-0.0505143	0.703984
beta_copaen_4_alpha_ol	beta_bourbonene	-0.0343685	0.796085
beta_gurjunene	beta_bourbonene	-0.0172414	0.896875
oxygenate_sesquiterpene	beta_bourbonene	-0.0172414	0.896875
delta_cadinene	beta_bourbonene	-0.0172414	0.896875
dihyidro_beta_agarofuran	beta_bourbonene	-0.0245902	0.853333
X10._epi_gamma_eudesmol	beta_bourbonene	-0.024591	0.853328
X4_epi_cis_dihydro_agarofuran	beta_bourbonene	-0.0172414	0.896875
cubenol	beta_bourbonene	-0.0172414	0.896875
Ecoli	beta_bisabolene	-0.00346473	0.979222
linalool	beta_bisabolene	-0.0303227	0.81966
camphene	beta_bisabolene	-0.0302893	0.819855
camphor	beta_bisabolene	-0.0172414	0.896875
alpha_phellandrene	beta_bisabolene	-0.024595	0.853305
beta_phellandrene	beta_bisabolene	-0.0476043	0.720317
ortho_cymene	beta_bisabolene	-0.0245918	0.853323
alpha_pinene	beta_bisabolene	-0.114217	0.389035
beta_pinene	beta_bisabolene	-0.0706334	0.595002
sabinene	beta_bisabolene	-0.0245417	0.853619
gamma_cadinene	beta_bisabolene	0.715871	1.85572e-10
myrcene	beta_bisabolene	-0.0342145	0.796979
delta_3_carene	beta_bisabolene	-0.0287092	0.829108
X1_8_cineole	beta_bisabolene	-0.0172414	0.896875
verbenone	beta_bisabolene	-0.0244538	0.854137
limonene	beta_bisabolene	-0.0491362	0.711703
cis_beta_ocimene	beta_bisabolene	-0.0172414	0.896875
trans_beta_ocimene	beta_bisabolene	-0.0245934	0.853314
germacreneA	beta_bisabolene	-0.0244964	0.853887
germacreneB	beta_bisabolene	-0.0301727	0.820538
germacreneD	beta_bisabolene	0.105955	0.424466
bicyclogermacrene	beta_bisabolene	-0.0810327	0.541788
X1_10_di_epi_cubenol	beta_bisabolene	1	0
bulnesol	beta_bisabolene	-0.0172414	0.896875
cis_beta_guaiene	beta_bisabolene	-0.0395334	0.766252
cis_cis_farnesol	beta_bisabolene	-0.0172414	0.896875
trans_cis_farnesol	beta_bisabolene	-0.0172414	0.896875
trans_beta_guaiene	beta_bisabolene	0.42085	0.000903263
trans_caryophyllene	beta_bisabolene	0.115837	0.382298
caryophyllene_oxide	beta_bisabolene	-0.0609827	0.646362
spathulenol	beta_bisabolene	-0.087311	0.510823
valencene	beta_bisabolene	-0.0172414	0.896875
ar.curcumene	beta_bisabolene	-0.0172414	0.896875
junipene	beta_bisabolene	-0.0172414	0.896875
alpha_selinene	beta_bisabolene	-0.0234473	0.86008
beta_selinene	beta_bisabolene	-0.0172414	0.896875
guaiol	beta_bisabolene	-0.0172414	0.896875
beta_elemene	beta_bisabolene	0.512383	3.345e-05
trans_yophyllene	beta_bisabolene	-0.0172414	0.896875
gamma_muurolene	beta_bisabolene	-0.0340079	0.798179
alpha_humulene	beta_bisabolene	-0.0245946	0.853307
trans_nerolidol	beta_bisabolene	-0.0505143	0.703984
beta_copaen_4_alpha_ol	beta_bisabolene	-0.0343685	0.796085
beta_gurjunene	beta_bisabolene	-0.0172414	0.896875
oxygenate_sesquiterpene	beta_bisabolene	-0.0172414	0.896875
delta_cadinene	beta_bisabolene	-0.0172414	0.896875
dihyidro_beta_agarofuran	beta_bisabolene	-0.0245902	0.853333
X10._epi_gamma_eudesmol	beta_bisabolene	-0.024591	0.853328
X4_epi_cis_dihydro_agarofuran	beta_bisabolene	-0.0172414	0.896875
cubenol	beta_bisabolene	-0.0172414	0.896875
beta_bourbonene	beta_bisabolene	-0.0172414	0.896875
Ecoli	aromadendrene	-0.0417933	0.753301
linalool	aromadendrene	-0.0303227	0.81966
camphene	aromadendrene	-0.0302893	0.819855
camphor	aromadendrene	-0.0172414	0.896875
alpha_phellandrene	aromadendrene	-0.024595	0.853305
beta_phellandrene	aromadendrene	-0.0476043	0.720317
ortho_cymene	aromadendrene	-0.0245918	0.853323
alpha_pinene	aromadendrene	-0.114217	0.389035
beta_pinene	aromadendrene	-0.0706334	0.595002
sabinene	aromadendrene	-0.0245417	0.853619
gamma_cadinene	aromadendrene	-0.0245905	0.853331
myrcene	aromadendrene	-0.0342145	0.796979
delta_3_carene	aromadendrene	0.343485	0.0077339
X1_8_cineole	aromadendrene	-0.0172414	0.896875
verbenone	aromadendrene	-0.0244538	0.854137
limonene	aromadendrene	-0.0491362	0.711703
cis_beta_ocimene	aromadendrene	-0.0172414	0.896875
trans_beta_ocimene	aromadendrene	-0.0245934	0.853314
germacreneA	aromadendrene	-0.0244964	0.853887
germacreneB	aromadendrene	-0.0301727	0.820538
germacreneD	aromadendrene	0.141692	0.284402
bicyclogermacrene	aromadendrene	0.273598	0.0360136
X1_10_di_epi_cubenol	aromadendrene	-0.0172414	0.896875
bulnesol	aromadendrene	-0.0172414	0.896875
cis_beta_guaiene	aromadendrene	-0.0395334	0.766252
cis_cis_farnesol	aromadendrene	-0.0172414	0.896875
trans_cis_farnesol	aromadendrene	-0.0172414	0.896875
trans_beta_guaiene	aromadendrene	-0.0432719	0.744864
trans_caryophyllene	aromadendrene	0.103972	0.433239
caryophyllene_oxide	aromadendrene	0.164122	0.214194
spathulenol	aromadendrene	0.167984	0.203457
valencene	aromadendrene	-0.0172414	0.896875
ar.curcumene	aromadendrene	-0.0172414	0.896875
junipene	aromadendrene	-0.0172414	0.896875
alpha_selinene	aromadendrene	-0.0234473	0.86008
beta_selinene	aromadendrene	-0.0172414	0.896875
guaiol	aromadendrene	-0.0172414	0.896875
beta_elemene	aromadendrene	-0.0302732	0.81995
trans_yophyllene	aromadendrene	-0.0172414	0.896875
gamma_muurolene	aromadendrene	-0.0340079	0.798179
alpha_humulene	aromadendrene	-0.0245946	0.853307
trans_nerolidol	aromadendrene	-0.0505143	0.703984
beta_copaen_4_alpha_ol	aromadendrene	-0.0343685	0.796085
beta_gurjunene	aromadendrene	-0.0172414	0.896875
oxygenate_sesquiterpene	aromadendrene	-0.0172414	0.896875
delta_cadinene	aromadendrene	-0.0172414	0.896875
dihyidro_beta_agarofuran	aromadendrene	-0.0245902	0.853333
X10._epi_gamma_eudesmol	aromadendrene	-0.024591	0.853328
X4_epi_cis_dihydro_agarofuran	aromadendrene	-0.0172414	0.896875
cubenol	aromadendrene	-0.0172414	0.896875
beta_bourbonene	aromadendrene	-0.0172414	0.896875
beta_bisabolene	aromadendrene	-0.0172414	0.896875
Ecoli	elemicine	0.293582	0.024022
linalool	elemicine	-0.0303227	0.81966
camphene	elemicine	-0.0302893	0.819855
camphor	elemicine	-0.0172414	0.896875
alpha_phellandrene	elemicine	-0.024595	0.853305
beta_phellandrene	elemicine	-0.0476043	0.720317
ortho_cymene	elemicine	-0.0245918	0.853323
alpha_pinene	elemicine	-0.114217	0.389035
beta_pinene	elemicine	-0.0706334	0.595002
sabinene	elemicine	-0.0245417	0.853619
gamma_cadinene	elemicine	-0.0245905	0.853331
myrcene	elemicine	-0.0342145	0.796979
delta_3_carene	elemicine	-0.0287092	0.829108
X1_8_cineole	elemicine	-0.0172414	0.896875
verbenone	elemicine	-0.0244538	0.854137
limonene	elemicine	-0.0491362	0.711703
cis_beta_ocimene	elemicine	-0.0172414	0.896875
trans_beta_ocimene	elemicine	-0.0245934	0.853314
germacreneA	elemicine	-0.0244964	0.853887
germacreneB	elemicine	-0.0301727	0.820538
germacreneD	elemicine	0.129184	0.329487
bicyclogermacrene	elemicine	-0.0810327	0.541788
X1_10_di_epi_cubenol	elemicine	-0.0172414	0.896875
bulnesol	elemicine	-0.0172414	0.896875
cis_beta_guaiene	elemicine	0.478728	0.000125351
cis_cis_farnesol	elemicine	-0.0172414	0.896875
trans_cis_farnesol	elemicine	-0.0172414	0.896875
trans_beta_guaiene	elemicine	-0.0432719	0.744864
trans_caryophyllene	elemicine	0.106276	0.423055
caryophyllene_oxide	elemicine	0.2011	0.126693
spathulenol	elemicine	0.22503	0.0866102
valencene	elemicine	-0.0172414	0.896875
ar.curcumene	elemicine	-0.0172414	0.896875
junipene	elemicine	-0.0172414	0.896875
alpha_selinene	elemicine	-0.0234473	0.86008
beta_selinene	elemicine	-0.0172414	0.896875
guaiol	elemicine	-0.0172414	0.896875
beta_elemene	elemicine	-0.0302732	0.81995
trans_yophyllene	elemicine	-0.0172414	0.896875
gamma_muurolene	elemicine	-0.0340079	0.798179
alpha_humulene	elemicine	-0.0245946	0.853307
trans_nerolidol	elemicine	-0.0505143	0.703984
beta_copaen_4_alpha_ol	elemicine	-0.0343685	0.796085
beta_gurjunene	elemicine	-0.0172414	0.896875
oxygenate_sesquiterpene	elemicine	-0.0172414	0.896875
delta_cadinene	elemicine	-0.0172414	0.896875
dihyidro_beta_agarofuran	elemicine	-0.0245902	0.853333
X10._epi_gamma_eudesmol	elemicine	-0.024591	0.853328
X4_epi_cis_dihydro_agarofuran	elemicine	-0.0172414	0.896875
cubenol	elemicine	-0.0172414	0.896875
beta_bourbonene	elemicine	-0.0172414	0.896875
beta_bisabolene	elemicine	-0.0172414	0.896875
aromadendrene	elemicine	-0.0172414	0.896875
Ecoli	asaricin	-0.15474	0.241916
linalool	asaricin	-0.0523067	0.693988
camphene	asaricin	-0.0522491	0.694308
camphor	asaricin	-0.0297414	0.823061
alpha_phellandrene	asaricin	-0.0424263	0.749686
beta_phellandrene	asaricin	-0.0821175	0.536373
ortho_cymene	asaricin	-0.0424209	0.749717
alpha_pinene	asaricin	-0.126591	0.33937
beta_pinene	asaricin	-0.121843	0.35794
sabinene	asaricin	-0.0423344	0.75021
gamma_cadinene	asaricin	-0.0424186	0.74973
myrcene	asaricin	-0.05902	0.657022
delta_3_carene	asaricin	-0.0495234	0.709531
X1_8_cineole	asaricin	-0.0297414	0.823061
verbenone	asaricin	-0.0421829	0.751075
limonene	asaricin	-0.0847599	0.523296
cis_beta_ocimene	asaricin	-0.0297414	0.823061
trans_beta_ocimene	asaricin	-0.0424237	0.749701
germacreneA	asaricin	-0.0422562	0.750657
germacreneB	asaricin	-0.0520479	0.695428
germacreneD	asaricin	-0.155378	0.239954
bicyclogermacrene	asaricin	-0.139781	0.291012
X1_10_di_epi_cubenol	asaricin	-0.0297414	0.823061
bulnesol	asaricin	-0.0297414	0.823061
cis_beta_guaiene	asaricin	-0.0681951	0.607806
cis_cis_farnesol	asaricin	-0.0297414	0.823061
trans_cis_farnesol	asaricin	-0.0297414	0.823061
trans_beta_guaiene	asaricin	-0.0746441	0.574205
trans_caryophyllene	asaricin	-0.168824	0.201175
caryophyllene_oxide	asaricin	-0.105195	0.427815
spathulenol	asaricin	-0.036941	0.781187
valencene	asaricin	0.38599	0.00253309
ar.curcumene	asaricin	-0.0297414	0.823061
junipene	asaricin	-0.0297414	0.823061
alpha_selinene	asaricin	-0.0404466	0.761011
beta_selinene	asaricin	-0.0297414	0.823061
guaiol	asaricin	-0.0297414	0.823061
beta_elemene	asaricin	-0.0522213	0.694463
trans_yophyllene	asaricin	-0.0297414	0.823061
gamma_muurolene	asaricin	-0.0586637	0.658964
alpha_humulene	asaricin	-0.0424257	0.749689
trans_nerolidol	asaricin	-0.0871372	0.511668
beta_copaen_4_alpha_ol	asaricin	-0.0592857	0.655575
beta_gurjunene	asaricin	-0.0297414	0.823061
oxygenate_sesquiterpene	asaricin	-0.0297414	0.823061
delta_cadinene	asaricin	-0.0297414	0.823061
dihyidro_beta_agarofuran	asaricin	-0.0424181	0.749733
X10._epi_gamma_eudesmol	asaricin	-0.0424195	0.749725
X4_epi_cis_dihydro_agarofuran	asaricin	-0.0297414	0.823061
cubenol	asaricin	-0.0297414	0.823061
beta_bourbonene	asaricin	-0.0297414	0.823061
beta_bisabolene	asaricin	-0.0297414	0.823061
aromadendrene	asaricin	-0.0297414	0.823061
elemicine	asaricin	-0.0297414	0.823061
Ecoli	safrol	-0.158071	0.231805
linalool	safrol	-0.0534328	0.687735
camphene	safrol	-0.053374	0.688061
camphor	safrol	-0.0303817	0.819315
alpha_phellandrene	safrol	-0.0433397	0.744478
beta_phellandrene	safrol	-0.0838854	0.527606
ortho_cymene	safrol	-0.0433342	0.74451
alpha_pinene	safrol	-0.0965453	0.466973
beta_pinene	safrol	-0.124466	0.347606
sabinene	safrol	-0.0432458	0.745013
gamma_cadinene	safrol	-0.0433318	0.744523
myrcene	safrol	-0.0602907	0.650113
delta_3_carene	safrol	-0.0505896	0.703563
X1_8_cineole	safrol	-0.0303817	0.819315
verbenone	safrol	-0.0430911	0.745895
limonene	safrol	-0.0865847	0.514359
cis_beta_ocimene	safrol	-0.0303817	0.819315
trans_beta_ocimene	safrol	-0.043337	0.744493
germacreneA	safrol	-0.043166	0.745468
germacreneB	safrol	-0.0531684	0.689201
germacreneD	safrol	-0.158723	0.229859
bicyclogermacrene	safrol	-0.142791	0.280646
X1_10_di_epi_cubenol	safrol	-0.0303817	0.819315
bulnesol	safrol	-0.0303817	0.819315
cis_beta_guaiene	safrol	-0.0696633	0.600082
cis_cis_farnesol	safrol	-0.0303817	0.819315
trans_cis_farnesol	safrol	-0.0303817	0.819315
trans_beta_guaiene	safrol	-0.0762511	0.565967
trans_caryophyllene	safrol	-0.172458	0.191503
caryophyllene_oxide	safrol	-0.10746	0.41788
spathulenol	safrol	0.0151526	0.909312
valencene	safrol	0.587732	9.87844e-07
ar.curcumene	safrol	-0.0303817	0.819315
junipene	safrol	-0.0303817	0.819315
alpha_selinene	safrol	-0.0413173	0.756024
beta_selinene	safrol	-0.0303817	0.819315
guaiol	safrol	-0.0303817	0.819315
beta_elemene	safrol	-0.0533456	0.688218
trans_yophyllene	safrol	-0.0303817	0.819315
gamma_muurolene	safrol	-0.0599266	0.652089
alpha_humulene	safrol	-0.0433391	0.744482
trans_nerolidol	safrol	-0.0890131	0.502586
beta_copaen_4_alpha_ol	safrol	-0.060562	0.648641
beta_gurjunene	safrol	-0.0303817	0.819315
oxygenate_sesquiterpene	safrol	-0.0303817	0.819315
delta_cadinene	safrol	-0.0303817	0.819315
dihyidro_beta_agarofuran	safrol	-0.0433313	0.744526
X10._epi_gamma_eudesmol	safrol	-0.0433327	0.744518
X4_epi_cis_dihydro_agarofuran	safrol	-0.0303817	0.819315
cubenol	safrol	-0.0303817	0.819315
beta_bourbonene	safrol	-0.0303817	0.819315
beta_bisabolene	safrol	-0.0303817	0.819315
aromadendrene	safrol	-0.0303817	0.819315
elemicine	safrol	-0.0303817	0.819315
asaricin	safrol	0.973201	0
Ecoli	methyl_iso_eugenol	-0.089704	0.499262
linalool	methyl_iso_eugenol	-0.0303227	0.81966
camphene	methyl_iso_eugenol	-0.0302893	0.819855
camphor	methyl_iso_eugenol	-0.0172414	0.896875
alpha_phellandrene	methyl_iso_eugenol	-0.024595	0.853305
beta_phellandrene	methyl_iso_eugenol	-0.0476043	0.720317
ortho_cymene	methyl_iso_eugenol	-0.0245918	0.853323
alpha_pinene	methyl_iso_eugenol	-0.114217	0.389035
beta_pinene	methyl_iso_eugenol	-0.0706334	0.595002
sabinene	methyl_iso_eugenol	-0.0245417	0.853619
gamma_cadinene	methyl_iso_eugenol	-0.0245905	0.853331
myrcene	methyl_iso_eugenol	-0.0342145	0.796979
delta_3_carene	methyl_iso_eugenol	-0.0287092	0.829108
X1_8_cineole	methyl_iso_eugenol	-0.0172414	0.896875
verbenone	methyl_iso_eugenol	-0.0244538	0.854137
limonene	methyl_iso_eugenol	-0.0491362	0.711703
cis_beta_ocimene	methyl_iso_eugenol	-0.0172414	0.896875
trans_beta_ocimene	methyl_iso_eugenol	-0.0245934	0.853314
germacreneA	methyl_iso_eugenol	-0.0244964	0.853887
germacreneB	methyl_iso_eugenol	-0.0301727	0.820538
germacreneD	methyl_iso_eugenol	-0.0900743	0.497485
bicyclogermacrene	methyl_iso_eugenol	-0.0810327	0.541788
X1_10_di_epi_cubenol	methyl_iso_eugenol	-0.0172414	0.896875
bulnesol	methyl_iso_eugenol	-0.0172414	0.896875
cis_beta_guaiene	methyl_iso_eugenol	-0.0395334	0.766252
cis_cis_farnesol	methyl_iso_eugenol	-0.0172414	0.896875
trans_cis_farnesol	methyl_iso_eugenol	-0.0172414	0.896875
trans_beta_guaiene	methyl_iso_eugenol	-0.0432719	0.744864
trans_caryophyllene	methyl_iso_eugenol	-0.0978688	0.460859
caryophyllene_oxide	methyl_iso_eugenol	-0.0609827	0.646362
spathulenol	methyl_iso_eugenol	-0.087311	0.510823
valencene	methyl_iso_eugenol	-0.0172414	0.896875
ar.curcumene	methyl_iso_eugenol	-0.0172414	0.896875
junipene	methyl_iso_eugenol	-0.0172414	0.896875
alpha_selinene	methyl_iso_eugenol	-0.0234473	0.86008
beta_selinene	methyl_iso_eugenol	-0.0172414	0.896875
guaiol	methyl_iso_eugenol	-0.0172414	0.896875
beta_elemene	methyl_iso_eugenol	-0.0302732	0.81995
trans_yophyllene	methyl_iso_eugenol	-0.0172414	0.896875
gamma_muurolene	methyl_iso_eugenol	-0.0340079	0.798179
alpha_humulene	methyl_iso_eugenol	-0.0245946	0.853307
trans_nerolidol	methyl_iso_eugenol	-0.0505143	0.703984
beta_copaen_4_alpha_ol	methyl_iso_eugenol	-0.0343685	0.796085
beta_gurjunene	methyl_iso_eugenol	-0.0172414	0.896875
oxygenate_sesquiterpene	methyl_iso_eugenol	-0.0172414	0.896875
delta_cadinene	methyl_iso_eugenol	-0.0172414	0.896875
dihyidro_beta_agarofuran	methyl_iso_eugenol	-0.0245902	0.853333
X10._epi_gamma_eudesmol	methyl_iso_eugenol	-0.024591	0.853328
X4_epi_cis_dihydro_agarofuran	methyl_iso_eugenol	-0.0172414	0.896875
cubenol	methyl_iso_eugenol	-0.0172414	0.896875
beta_bourbonene	methyl_iso_eugenol	-0.0172414	0.896875
beta_bisabolene	methyl_iso_eugenol	-0.0172414	0.896875
aromadendrene	methyl_iso_eugenol	-0.0172414	0.896875
elemicine	methyl_iso_eugenol	-0.0172414	0.896875
asaricin	methyl_iso_eugenol	-0.0297414	0.823061
safrol	methyl_iso_eugenol	-0.0303817	0.819315
Ecoli	methyl_eugenol	-0.125626	0.343094
linalool	methyl_eugenol	-0.0424655	0.749462
camphene	methyl_eugenol	0.274801	0.035173
camphor	methyl_eugenol	0.552321	5.75428e-06
alpha_phellandrene	methyl_eugenol	-0.034444	0.795646
beta_phellandrene	methyl_eugenol	-0.0666676	0.615889
ortho_cymene	methyl_eugenol	-0.0344397	0.795672
alpha_pinene	methyl_eugenol	-0.159955	0.226217
beta_pinene	methyl_eugenol	-0.0989187	0.45604
sabinene	methyl_eugenol	-0.0343694	0.796079
gamma_cadinene	methyl_eugenol	-0.0344378	0.795683
myrcene	methyl_eugenol	-0.0479157	0.718563
delta_3_carene	methyl_eugenol	-0.0402059	0.762392
X1_8_cineole	methyl_eugenol	-0.0241457	0.855956
verbenone	methyl_eugenol	-0.0342464	0.796794
limonene	methyl_eugenol	0.0786602	0.553722
cis_beta_ocimene	methyl_eugenol	-0.0241457	0.855956
trans_beta_ocimene	methyl_eugenol	-0.0344419	0.795659
germacreneA	methyl_eugenol	-0.034306	0.796448
germacreneB	methyl_eugenol	-0.0422554	0.750662
germacreneD	methyl_eugenol	-0.126145	0.341089
bicyclogermacrene	methyl_eugenol	-0.113482	0.392112
X1_10_di_epi_cubenol	methyl_eugenol	-0.0241457	0.855956
bulnesol	methyl_eugenol	-0.0241457	0.855956
cis_beta_guaiene	methyl_eugenol	-0.0553646	0.677056
cis_cis_farnesol	methyl_eugenol	-0.0241457	0.855956
trans_cis_farnesol	methyl_eugenol	-0.0241457	0.855956
trans_beta_guaiene	methyl_eugenol	-0.0606002	0.648434
trans_caryophyllene	methyl_eugenol	-0.137061	0.300598
caryophyllene_oxide	methyl_eugenol	-0.0854034	0.520135
spathulenol	methyl_eugenol	-0.122275	0.356224
valencene	methyl_eugenol	-0.0241457	0.855956
ar.curcumene	methyl_eugenol	-0.0241457	0.855956
junipene	methyl_eugenol	-0.0241457	0.855956
alpha_selinene	methyl_eugenol	-0.0328368	0.80499
beta_selinene	methyl_eugenol	-0.0241457	0.855956
guaiol	methyl_eugenol	-0.0241457	0.855956
beta_elemene	methyl_eugenol	-0.0423962	0.749858
trans_yophyllene	methyl_eugenol	-0.0241457	0.855956
gamma_muurolene	methyl_eugenol	-0.0476264	0.720192
alpha_humulene	methyl_eugenol	-0.0344435	0.795649
trans_nerolidol	methyl_eugenol	-0.0707428	0.59443
beta_copaen_4_alpha_ol	methyl_eugenol	-0.0481314	0.717349
beta_gurjunene	methyl_eugenol	-0.0241457	0.855956
oxygenate_sesquiterpene	methyl_eugenol	-0.0241457	0.855956
delta_cadinene	methyl_eugenol	-0.0241457	0.855956
dihyidro_beta_agarofuran	methyl_eugenol	-0.0344374	0.795685
X10._epi_gamma_eudesmol	methyl_eugenol	-0.0344385	0.795678
X4_epi_cis_dihydro_agarofuran	methyl_eugenol	-0.0241457	0.855956
cubenol	methyl_eugenol	-0.0241457	0.855956
beta_bourbonene	methyl_eugenol	-0.0241457	0.855956
beta_bisabolene	methyl_eugenol	-0.0241457	0.855956
aromadendrene	methyl_eugenol	-0.0241457	0.855956
elemicine	methyl_eugenol	-0.0241457	0.855956
asaricin	methyl_eugenol	-0.0416514	0.754113
safrol	methyl_eugenol	-0.0425481	0.748991
methyl_iso_eugenol	methyl_eugenol	0.823985	1.11022e-15
Ecoli	benzyl_salicylate	-0.089704	0.499262
linalool	benzyl_salicylate	-0.0303227	0.81966
camphene	benzyl_salicylate	-0.0302893	0.819855
camphor	benzyl_salicylate	-0.0172414	0.896875
alpha_phellandrene	benzyl_salicylate	-0.024595	0.853305
beta_phellandrene	benzyl_salicylate	-0.0476043	0.720317
ortho_cymene	benzyl_salicylate	-0.0245918	0.853323
alpha_pinene	benzyl_salicylate	0.0977038	0.461619
beta_pinene	benzyl_salicylate	0.149812	0.257419
sabinene	benzyl_salicylate	-0.0245417	0.853619
gamma_cadinene	benzyl_salicylate	-0.0245905	0.853331
myrcene	benzyl_salicylate	-0.0342145	0.796979
delta_3_carene	benzyl_salicylate	-0.0287092	0.829108
X1_8_cineole	benzyl_salicylate	-0.0172414	0.896875
verbenone	benzyl_salicylate	-0.0244538	0.854137
limonene	benzyl_salicylate	-0.0491362	0.711703
cis_beta_ocimene	benzyl_salicylate	-0.0172414	0.896875
trans_beta_ocimene	benzyl_salicylate	-0.0245934	0.853314
germacreneA	benzyl_salicylate	-0.0244964	0.853887
germacreneB	benzyl_salicylate	-0.0301727	0.820538
germacreneD	benzyl_salicylate	-0.0900743	0.497485
bicyclogermacrene	benzyl_salicylate	-0.0810327	0.541788
X1_10_di_epi_cubenol	benzyl_salicylate	-0.0172414	0.896875
bulnesol	benzyl_salicylate	-0.0172414	0.896875
cis_beta_guaiene	benzyl_salicylate	-0.0395334	0.766252
cis_cis_farnesol	benzyl_salicylate	-0.0172414	0.896875
trans_cis_farnesol	benzyl_salicylate	-0.0172414	0.896875
trans_beta_guaiene	benzyl_salicylate	-0.0432719	0.744864
trans_caryophyllene	benzyl_salicylate	-0.0978688	0.460859
caryophyllene_oxide	benzyl_salicylate	-0.0609827	0.646362
spathulenol	benzyl_salicylate	0.145662	0.270987
valencene	benzyl_salicylate	-0.0172414	0.896875
ar.curcumene	benzyl_salicylate	-0.0172414	0.896875
junipene	benzyl_salicylate	-0.0172414	0.896875
alpha_selinene	benzyl_salicylate	-0.0234473	0.86008
beta_selinene	benzyl_salicylate	-0.0172414	0.896875
guaiol	benzyl_salicylate	-0.0172414	0.896875
beta_elemene	benzyl_salicylate	-0.0302732	0.81995
trans_yophyllene	benzyl_salicylate	-0.0172414	0.896875
gamma_muurolene	benzyl_salicylate	-0.0340079	0.798179
alpha_humulene	benzyl_salicylate	-0.0245946	0.853307
trans_nerolidol	benzyl_salicylate	-0.0505143	0.703984
beta_copaen_4_alpha_ol	benzyl_salicylate	-0.0343685	0.796085
beta_gurjunene	benzyl_salicylate	-0.0172414	0.896875
oxygenate_sesquiterpene	benzyl_salicylate	-0.0172414	0.896875
delta_cadinene	benzyl_salicylate	-0.0172414	0.896875
dihyidro_beta_agarofuran	benzyl_salicylate	-0.0245902	0.853333
X10._epi_gamma_eudesmol	benzyl_salicylate	-0.024591	0.853328
X4_epi_cis_dihydro_agarofuran	benzyl_salicylate	-0.0172414	0.896875
cubenol	benzyl_salicylate	-0.0172414	0.896875
beta_bourbonene	benzyl_salicylate	-0.0172414	0.896875
beta_bisabolene	benzyl_salicylate	-0.0172414	0.896875
aromadendrene	benzyl_salicylate	-0.0172414	0.896875
elemicine	benzyl_salicylate	-0.0172414	0.896875
asaricin	benzyl_salicylate	-0.0297414	0.823061
safrol	benzyl_salicylate	-0.0303817	0.819315
methyl_iso_eugenol	benzyl_salicylate	-0.0172414	0.896875
methyl_eugenol	benzyl_salicylate	-0.0241457	0.855956
Ecoli	benzyl_benzoate	-0.089704	0.499262
linalool	benzyl_benzoate	-0.0303227	0.81966
camphene	benzyl_benzoate	-0.0302893	0.819855
camphor	benzyl_benzoate	-0.0172414	0.896875
alpha_phellandrene	benzyl_benzoate	-0.024595	0.853305
beta_phellandrene	benzyl_benzoate	-0.0476043	0.720317
ortho_cymene	benzyl_benzoate	-0.0245918	0.853323
alpha_pinene	benzyl_benzoate	0.0977038	0.461619
beta_pinene	benzyl_benzoate	0.149812	0.257419
sabinene	benzyl_benzoate	-0.0245417	0.853619
gamma_cadinene	benzyl_benzoate	-0.0245905	0.853331
myrcene	benzyl_benzoate	-0.0342145	0.796979
delta_3_carene	benzyl_benzoate	-0.0287092	0.829108
X1_8_cineole	benzyl_benzoate	-0.0172414	0.896875
verbenone	benzyl_benzoate	-0.0244538	0.854137
limonene	benzyl_benzoate	-0.0491362	0.711703
cis_beta_ocimene	benzyl_benzoate	-0.0172414	0.896875
trans_beta_ocimene	benzyl_benzoate	-0.0245934	0.853314
germacreneA	benzyl_benzoate	-0.0244964	0.853887
germacreneB	benzyl_benzoate	-0.0301727	0.820538
germacreneD	benzyl_benzoate	-0.0900743	0.497485
bicyclogermacrene	benzyl_benzoate	-0.0810327	0.541788
X1_10_di_epi_cubenol	benzyl_benzoate	-0.0172414	0.896875
bulnesol	benzyl_benzoate	-0.0172414	0.896875
cis_beta_guaiene	benzyl_benzoate	-0.0395334	0.766252
cis_cis_farnesol	benzyl_benzoate	-0.0172414	0.896875
trans_cis_farnesol	benzyl_benzoate	-0.0172414	0.896875
trans_beta_guaiene	benzyl_benzoate	-0.0432719	0.744864
trans_caryophyllene	benzyl_benzoate	-0.0978688	0.460859
caryophyllene_oxide	benzyl_benzoate	-0.0609827	0.646362
spathulenol	benzyl_benzoate	0.145662	0.270987
valencene	benzyl_benzoate	-0.0172414	0.896875
ar.curcumene	benzyl_benzoate	-0.0172414	0.896875
junipene	benzyl_benzoate	-0.0172414	0.896875
alpha_selinene	benzyl_benzoate	-0.0234473	0.86008
beta_selinene	benzyl_benzoate	-0.0172414	0.896875
guaiol	benzyl_benzoate	-0.0172414	0.896875
beta_elemene	benzyl_benzoate	-0.0302732	0.81995
trans_yophyllene	benzyl_benzoate	-0.0172414	0.896875
gamma_muurolene	benzyl_benzoate	-0.0340079	0.798179
alpha_humulene	benzyl_benzoate	-0.0245946	0.853307
trans_nerolidol	benzyl_benzoate	-0.0505143	0.703984
beta_copaen_4_alpha_ol	benzyl_benzoate	-0.0343685	0.796085
beta_gurjunene	benzyl_benzoate	-0.0172414	0.896875
oxygenate_sesquiterpene	benzyl_benzoate	-0.0172414	0.896875
delta_cadinene	benzyl_benzoate	-0.0172414	0.896875
dihyidro_beta_agarofuran	benzyl_benzoate	-0.0245902	0.853333
X10._epi_gamma_eudesmol	benzyl_benzoate	-0.024591	0.853328
X4_epi_cis_dihydro_agarofuran	benzyl_benzoate	-0.0172414	0.896875
cubenol	benzyl_benzoate	-0.0172414	0.896875
beta_bourbonene	benzyl_benzoate	-0.0172414	0.896875
beta_bisabolene	benzyl_benzoate	-0.0172414	0.896875
aromadendrene	benzyl_benzoate	-0.0172414	0.896875
elemicine	benzyl_benzoate	-0.0172414	0.896875
asaricin	benzyl_benzoate	-0.0297414	0.823061
safrol	benzyl_benzoate	-0.0303817	0.819315
methyl_iso_eugenol	benzyl_benzoate	-0.0172414	0.896875
methyl_eugenol	benzyl_benzoate	-0.0241457	0.855956
benzyl_salicylate	benzyl_benzoate	1	0
Ecoli	X2_tridecanone	-0.089704	0.499262
linalool	X2_tridecanone	-0.0303227	0.81966
camphene	X2_tridecanone	-0.0302893	0.819855
camphor	X2_tridecanone	-0.0172414	0.896875
alpha_phellandrene	X2_tridecanone	-0.024595	0.853305
beta_phellandrene	X2_tridecanone	0.399779	0.00170691
ortho_cymene	X2_tridecanone	-0.0245918	0.853323
alpha_pinene	X2_tridecanone	0.149572	0.258191
beta_pinene	X2_tridecanone	-0.0706334	0.595002
sabinene	X2_tridecanone	-0.0245417	0.853619
gamma_cadinene	X2_tridecanone	-0.0245905	0.853331
myrcene	X2_tridecanone	-0.0342145	0.796979
delta_3_carene	X2_tridecanone	-0.0287092	0.829108
X1_8_cineole	X2_tridecanone	-0.0172414	0.896875
verbenone	X2_tridecanone	-0.0244538	0.854137
limonene	X2_tridecanone	-0.0491362	0.711703
cis_beta_ocimene	X2_tridecanone	-0.0172414	0.896875
trans_beta_ocimene	X2_tridecanone	-0.0245934	0.853314
germacreneA	X2_tridecanone	-0.0244964	0.853887
germacreneB	X2_tridecanone	-0.0301727	0.820538
germacreneD	X2_tridecanone	-0.0900743	0.497485
bicyclogermacrene	X2_tridecanone	-0.0810327	0.541788
X1_10_di_epi_cubenol	X2_tridecanone	-0.0172414	0.896875
bulnesol	X2_tridecanone	-0.0172414	0.896875
cis_beta_guaiene	X2_tridecanone	-0.0395334	0.766252
cis_cis_farnesol	X2_tridecanone	-0.0172414	0.896875
trans_cis_farnesol	X2_tridecanone	-0.0172414	0.896875
trans_beta_guaiene	X2_tridecanone	-0.0432719	0.744864
trans_caryophyllene	X2_tridecanone	-0.0978688	0.460859
caryophyllene_oxide	X2_tridecanone	-0.0609827	0.646362
spathulenol	X2_tridecanone	-0.087311	0.510823
valencene	X2_tridecanone	-0.0172414	0.896875
ar.curcumene	X2_tridecanone	-0.0172414	0.896875
junipene	X2_tridecanone	-0.0172414	0.896875
alpha_selinene	X2_tridecanone	-0.0234473	0.86008
beta_selinene	X2_tridecanone	-0.0172414	0.896875
guaiol	X2_tridecanone	-0.0172414	0.896875
beta_elemene	X2_tridecanone	-0.0302732	0.81995
trans_yophyllene	X2_tridecanone	-0.0172414	0.896875
gamma_muurolene	X2_tridecanone	-0.0340079	0.798179
alpha_humulene	X2_tridecanone	-0.0245946	0.853307
trans_nerolidol	X2_tridecanone	-0.0505143	0.703984
beta_copaen_4_alpha_ol	X2_tridecanone	-0.0343685	0.796085
beta_gurjunene	X2_tridecanone	-0.0172414	0.896875
oxygenate_sesquiterpene	X2_tridecanone	-0.0172414	0.896875
delta_cadinene	X2_tridecanone	-0.0172414	0.896875
dihyidro_beta_agarofuran	X2_tridecanone	-0.0245902	0.853333
X10._epi_gamma_eudesmol	X2_tridecanone	-0.024591	0.853328
X4_epi_cis_dihydro_agarofuran	X2_tridecanone	-0.0172414	0.896875
cubenol	X2_tridecanone	-0.0172414	0.896875
beta_bourbonene	X2_tridecanone	-0.0172414	0.896875
beta_bisabolene	X2_tridecanone	-0.0172414	0.896875
aromadendrene	X2_tridecanone	-0.0172414	0.896875
elemicine	X2_tridecanone	-0.0172414	0.896875
asaricin	X2_tridecanone	-0.0297414	0.823061
safrol	X2_tridecanone	-0.0303817	0.819315
methyl_iso_eugenol	X2_tridecanone	-0.0172414	0.896875
methyl_eugenol	X2_tridecanone	-0.0241457	0.855956
benzyl_salicylate	X2_tridecanone	-0.0172414	0.896875
benzyl_benzoate	X2_tridecanone	-0.0172414	0.896875
Ecoli	X2_undecanone	-0.089704	0.499262
linalool	X2_undecanone	-0.0303227	0.81966
camphene	X2_undecanone	-0.0302893	0.819855
camphor	X2_undecanone	-0.0172414	0.896875
alpha_phellandrene	X2_undecanone	-0.024595	0.853305
beta_phellandrene	X2_undecanone	0.399779	0.00170691
ortho_cymene	X2_undecanone	-0.0245918	0.853323
alpha_pinene	X2_undecanone	0.149572	0.258191
beta_pinene	X2_undecanone	-0.0706334	0.595002
sabinene	X2_undecanone	-0.0245417	0.853619
gamma_cadinene	X2_undecanone	-0.0245905	0.853331
myrcene	X2_undecanone	-0.0342145	0.796979
delta_3_carene	X2_undecanone	-0.0287092	0.829108
X1_8_cineole	X2_undecanone	-0.0172414	0.896875
verbenone	X2_undecanone	-0.0244538	0.854137
limonene	X2_undecanone	-0.0491362	0.711703
cis_beta_ocimene	X2_undecanone	-0.0172414	0.896875
trans_beta_ocimene	X2_undecanone	-0.0245934	0.853314
germacreneA	X2_undecanone	-0.0244964	0.853887
germacreneB	X2_undecanone	-0.0301727	0.820538
germacreneD	X2_undecanone	-0.0900743	0.497485
bicyclogermacrene	X2_undecanone	-0.0810327	0.541788
X1_10_di_epi_cubenol	X2_undecanone	-0.0172414	0.896875
bulnesol	X2_undecanone	-0.0172414	0.896875
cis_beta_guaiene	X2_undecanone	-0.0395334	0.766252
cis_cis_farnesol	X2_undecanone	-0.0172414	0.896875
trans_cis_farnesol	X2_undecanone	-0.0172414	0.896875
trans_beta_guaiene	X2_undecanone	-0.0432719	0.744864
trans_caryophyllene	X2_undecanone	-0.0978688	0.460859
caryophyllene_oxide	X2_undecanone	-0.0609827	0.646362
spathulenol	X2_undecanone	-0.087311	0.510823
valencene	X2_undecanone	-0.0172414	0.896875
ar.curcumene	X2_undecanone	-0.0172414	0.896875
junipene	X2_undecanone	-0.0172414	0.896875
alpha_selinene	X2_undecanone	-0.0234473	0.86008
beta_selinene	X2_undecanone	-0.0172414	0.896875
guaiol	X2_undecanone	-0.0172414	0.896875
beta_elemene	X2_undecanone	-0.0302732	0.81995
trans_yophyllene	X2_undecanone	-0.0172414	0.896875
gamma_muurolene	X2_undecanone	-0.0340079	0.798179
alpha_humulene	X2_undecanone	-0.0245946	0.853307
trans_nerolidol	X2_undecanone	-0.0505143	0.703984
beta_copaen_4_alpha_ol	X2_undecanone	-0.0343685	0.796085
beta_gurjunene	X2_undecanone	-0.0172414	0.896875
oxygenate_sesquiterpene	X2_undecanone	-0.0172414	0.896875
delta_cadinene	X2_undecanone	-0.0172414	0.896875
dihyidro_beta_agarofuran	X2_undecanone	-0.0245902	0.853333
X10._epi_gamma_eudesmol	X2_undecanone	-0.024591	0.853328
X4_epi_cis_dihydro_agarofuran	X2_undecanone	-0.0172414	0.896875
cubenol	X2_undecanone	-0.0172414	0.896875
beta_bourbonene	X2_undecanone	-0.0172414	0.896875
beta_bisabolene	X2_undecanone	-0.0172414	0.896875
aromadendrene	X2_undecanone	-0.0172414	0.896875
elemicine	X2_undecanone	-0.0172414	0.896875
asaricin	X2_undecanone	-0.0297414	0.823061
safrol	X2_undecanone	-0.0303817	0.819315
methyl_iso_eugenol	X2_undecanone	-0.0172414	0.896875
methyl_eugenol	X2_undecanone	-0.0241457	0.855956
benzyl_salicylate	X2_undecanone	-0.0172414	0.896875
benzyl_benzoate	X2_undecanone	-0.0172414	0.896875
X2_tridecanone	X2_undecanone	1	0

## Sheet: S epidermidis
		Pearson´s r	p-value
Sepidermidis	linalool	-0.110321	0.405521
Sepidermidis	camphene	-0.0517799	0.696921
linalool	camphene	-0.0532704	0.688635
Sepidermidis	camphor	-0.0733694	0.580778
linalool	camphor	-0.0303227	0.81966
camphene	camphor	0.529481	1.61799e-05
Sepidermidis	alpha_phellandrene	-0.0540137	0.684517
linalool	alpha_phellandrene	-0.0432556	0.744957
camphene	alpha_phellandrene	-0.043208	0.745228
camphor	alpha_phellandrene	-0.024595	0.853305
Sepidermidis	beta_phellandrene	0.0778441	0.557856
linalool	beta_phellandrene	-0.0837226	0.528411
camphene	beta_phellandrene	-0.0836304	0.528866
camphor	beta_phellandrene	-0.0476043	0.720317
alpha_phellandrene	beta_phellandrene	0.18018	0.172071
Sepidermidis	ortho_cymene	-0.0553556	0.677105
linalool	ortho_cymene	-0.04325	0.744989
camphene	ortho_cymene	-0.0432025	0.74526
camphor	ortho_cymene	-0.0245918	0.853323
alpha_phellandrene	ortho_cymene	0.477534	0.000131044
beta_phellandrene	ortho_cymene	-0.0678993	0.609368
Sepidermidis	alpha_pinene	0.115223	0.384844
linalool	alpha_pinene	-0.0581617	0.661705
camphene	alpha_pinene	0.0722277	0.586695
camphor	alpha_pinene	-0.114217	0.389035
alpha_phellandrene	alpha_pinene	0.0270335	0.838945
beta_phellandrene	alpha_pinene	0.162032	0.220168
ortho_cymene	alpha_pinene	-0.16291	0.217643
Sepidermidis	beta_pinene	-0.0195422	0.883204
linalool	beta_pinene	-0.124224	0.34855
camphene	beta_pinene	-0.124088	0.349085
camphor	beta_pinene	-0.0706334	0.595002
alpha_phellandrene	beta_pinene	-0.100759	0.447661
beta_phellandrene	beta_pinene	-0.195022	0.13882
ortho_cymene	beta_pinene	-0.100746	0.447719
alpha_pinene	beta_pinene	0.355972	0.00565683
Sepidermidis	sabinene	-0.104435	0.431179
linalool	sabinene	-0.0431619	0.745491
camphene	sabinene	-0.0431144	0.745762
camphor	sabinene	-0.0245417	0.853619
alpha_phellandrene	sabinene	-0.0350089	0.792369
beta_phellandrene	sabinene	0.39734	0.00183259
ortho_cymene	sabinene	-0.0350044	0.792395
alpha_pinene	sabinene	-0.0455884	0.731706
beta_pinene	sabinene	-0.100541	0.44865
Sepidermidis	gamma_cadinene	-0.0943959	0.476994
linalool	gamma_cadinene	-0.0432477	0.745002
camphene	gamma_cadinene	-0.0432001	0.745273
camphor	gamma_cadinene	-0.0245905	0.853331
alpha_phellandrene	gamma_cadinene	-0.0350785	0.791965
beta_phellandrene	gamma_cadinene	-0.0678956	0.609388
ortho_cymene	gamma_cadinene	0.480666	0.000116596
alpha_pinene	gamma_cadinene	-0.162901	0.217668
beta_pinene	gamma_cadinene	-0.100741	0.447744
sabinene	gamma_cadinene	-0.0350025	0.792406
Sepidermidis	myrcene	-0.0700098	0.598265
linalool	myrcene	-0.0601736	0.650748
camphene	myrcene	-0.0601074	0.651107
camphor	myrcene	-0.0342145	0.796979
alpha_phellandrene	myrcene	-0.0488072	0.71355
beta_phellandrene	myrcene	0.243042	0.0636228
ortho_cymene	myrcene	0.248243	0.0579883
alpha_pinene	myrcene	-0.0194997	0.883456
beta_pinene	myrcene	-0.140168	0.289668
sabinene	myrcene	0.277053	0.0336424
gamma_cadinene	myrcene	0.236923	0.0708056
Sepidermidis	delta_3_carene	-0.0365336	0.783541
linalool	delta_3_carene	-0.0504914	0.704112
camphene	delta_3_carene	-0.0504358	0.704422
camphor	delta_3_carene	-0.0287092	0.829108
alpha_phellandrene	delta_3_carene	-0.0409539	0.758104
beta_phellandrene	delta_3_carene	-0.0792676	0.550655
ortho_cymene	delta_3_carene	-0.0409487	0.758134
alpha_pinene	delta_3_carene	0.0445106	0.737819
beta_pinene	delta_3_carene	-0.117614	0.374989
sabinene	delta_3_carene	-0.0408652	0.758612
gamma_cadinene	delta_3_carene	-0.0409465	0.758147
myrcene	delta_3_carene	0.533726	1.34273e-05
Sepidermidis	X1_8_cineole	-0.0733694	0.580778
linalool	X1_8_cineole	-0.0303227	0.81966
camphene	X1_8_cineole	-0.0302893	0.819855
camphor	X1_8_cineole	-0.0172414	0.896875
alpha_phellandrene	X1_8_cineole	-0.024595	0.853305
beta_phellandrene	X1_8_cineole	-0.0476043	0.720317
ortho_cymene	X1_8_cineole	-0.0245918	0.853323
alpha_pinene	X1_8_cineole	-0.114217	0.389035
beta_pinene	X1_8_cineole	-0.0706334	0.595002
sabinene	X1_8_cineole	-0.0245417	0.853619
gamma_cadinene	X1_8_cineole	-0.0245905	0.853331
myrcene	X1_8_cineole	-0.0342145	0.796979
delta_3_carene	X1_8_cineole	-0.0287092	0.829108
Sepidermidis	verbenone	-0.104062	0.432839
linalool	verbenone	-0.0430074	0.746371
camphene	verbenone	-0.0429601	0.746641
camphor	verbenone	-0.0244538	0.854137
alpha_phellandrene	verbenone	-0.0348836	0.793096
beta_phellandrene	verbenone	-0.0675184	0.611382
ortho_cymene	verbenone	0.433279	0.000608445
alpha_pinene	verbenone	-0.161996	0.22027
beta_pinene	verbenone	-0.100181	0.450283
sabinene	verbenone	-0.034808	0.793534
gamma_cadinene	verbenone	0.415436	0.00106793
myrcene	verbenone	0.210834	0.108964
delta_3_carene	verbenone	-0.0407189	0.75945
X1_8_cineole	verbenone	0.773486	6.92779e-13
Sepidermidis	limonene	-6.7592e-05	0.999595
linalool	limonene	0.0387908	0.770522
camphene	limonene	0.0568801	0.668721
camphor	limonene	0.211097	0.108512
alpha_phellandrene	limonene	-0.0700931	0.597829
beta_phellandrene	limonene	-0.135667	0.305584
ortho_cymene	limonene	-0.0700842	0.597876
alpha_pinene	limonene	0.0718463	0.588677
beta_pinene	limonene	0.084744	0.523374
sabinene	limonene	-0.0699413	0.598624
gamma_cadinene	limonene	-0.0700803	0.597896
myrcene	limonene	-0.0975078	0.462522
delta_3_carene	limonene	-0.0818183	0.537864
X1_8_cineole	limonene	-0.0491362	0.711703
verbenone	limonene	-0.069691	0.599937
Sepidermidis	cis_beta_ocimene	0.137791	0.298003
linalool	cis_beta_ocimene	-0.0303227	0.81966
camphene	cis_beta_ocimene	-0.0302893	0.819855
camphor	cis_beta_ocimene	-0.0172414	0.896875
alpha_phellandrene	cis_beta_ocimene	-0.024595	0.853305
beta_phellandrene	cis_beta_ocimene	-0.0476043	0.720317
ortho_cymene	cis_beta_ocimene	-0.0245918	0.853323
alpha_pinene	cis_beta_ocimene	0.154651	0.242189
beta_pinene	cis_beta_ocimene	-0.0706334	0.595002
sabinene	cis_beta_ocimene	-0.0245417	0.853619
gamma_cadinene	cis_beta_ocimene	-0.0245905	0.853331
myrcene	cis_beta_ocimene	-0.0342145	0.796979
delta_3_carene	cis_beta_ocimene	-0.0287092	0.829108
X1_8_cineole	cis_beta_ocimene	-0.0172414	0.896875
verbenone	cis_beta_ocimene	-0.0244538	0.854137
limonene	cis_beta_ocimene	0.218522	0.0963633
Sepidermidis	trans_beta_ocimene	-0.0537487	0.685984
linalool	trans_beta_ocimene	-0.0432529	0.744973
camphene	trans_beta_ocimene	-0.0432053	0.745244
camphor	trans_beta_ocimene	-0.0245934	0.853314
alpha_phellandrene	trans_beta_ocimene	-0.0350827	0.791941
beta_phellandrene	trans_beta_ocimene	-0.0679037	0.609345
ortho_cymene	trans_beta_ocimene	-0.0350782	0.791967
alpha_pinene	trans_beta_ocimene	-0.162921	0.217612
beta_pinene	trans_beta_ocimene	-0.100753	0.447689
sabinene	trans_beta_ocimene	-0.0350067	0.792382
gamma_cadinene	trans_beta_ocimene	-0.0350763	0.791978
myrcene	trans_beta_ocimene	-0.0488042	0.713567
delta_3_carene	trans_beta_ocimene	-0.0409514	0.758119
X1_8_cineole	trans_beta_ocimene	-0.0245934	0.853314
verbenone	trans_beta_ocimene	-0.0348814	0.793108
limonene	trans_beta_ocimene	0.25719	0.049245
cis_beta_ocimene	trans_beta_ocimene	-0.0245934	0.853314
Sepidermidis	germacreneA	0.0141092	0.915534
linalool	germacreneA	0.375306	0.00340068
camphene	germacreneA	-0.0430347	0.746216
camphor	germacreneA	-0.0244964	0.853887
alpha_phellandrene	germacreneA	-0.0349442	0.792744
beta_phellandrene	germacreneA	-0.0676357	0.610761
ortho_cymene	germacreneA	-0.0349398	0.79277
alpha_pinene	germacreneA	-0.162278	0.219459
beta_pinene	germacreneA	0.111757	0.399398
sabinene	germacreneA	-0.0348685	0.793183
gamma_cadinene	germacreneA	-0.0349379	0.792781
myrcene	germacreneA	-0.0486115	0.714649
delta_3_carene	germacreneA	-0.0407897	0.759045
X1_8_cineole	germacreneA	-0.0244964	0.853887
verbenone	germacreneA	-0.0347437	0.793907
limonene	germacreneA	-0.0698121	0.599302
cis_beta_ocimene	germacreneA	-0.0244964	0.853887
trans_beta_ocimene	germacreneA	-0.0349421	0.792757
Sepidermidis	germacreneB	0.000405788	0.997566
linalool	germacreneB	-0.0530652	0.689774
camphene	germacreneB	-0.0530068	0.690098
camphor	germacreneB	-0.0301727	0.820538
alpha_phellandrene	germacreneB	0.308801	0.017328
beta_phellandrene	germacreneB	0.0883904	0.505591
ortho_cymene	germacreneB	-0.0430361	0.746208
alpha_pinene	germacreneB	0.0523821	0.693569
beta_pinene	germacreneB	0.0504409	0.704394
sabinene	germacreneB	-0.0429483	0.746708
gamma_cadinene	germacreneB	-0.0430337	0.746221
myrcene	germacreneB	-0.0598759	0.652365
delta_3_carene	germacreneB	-0.0502416	0.705509
X1_8_cineole	germacreneB	-0.0301727	0.820538
verbenone	germacreneB	-0.0427946	0.747584
limonene	germacreneB	-0.085989	0.517267
cis_beta_ocimene	germacreneB	-0.0301727	0.820538
trans_beta_ocimene	germacreneB	-0.0430389	0.746192
germacreneA	germacreneB	-0.042869	0.74716
Sepidermidis	germacreneD	-0.209382	0.111479
linalool	germacreneD	-0.158415	0.230777
camphene	germacreneD	-0.158241	0.231297
camphor	germacreneD	-0.0900743	0.497485
alpha_phellandrene	germacreneD	0.0282071	0.832053
beta_phellandrene	germacreneD	0.0903264	0.496278
ortho_cymene	germacreneD	0.0354722	0.789683
alpha_pinene	germacreneD	-0.240246	0.0668281
beta_pinene	germacreneD	-0.0945542	0.476252
sabinene	germacreneD	-0.128213	0.333166
gamma_cadinene	germacreneD	0.171922	0.192908
myrcene	germacreneD	0.0556067	0.675722
delta_3_carene	germacreneD	-0.0651859	0.623772
X1_8_cineole	germacreneD	-0.0900743	0.497485
verbenone	germacreneD	0.0153946	0.907871
limonene	germacreneD	-0.117147	0.376902
cis_beta_ocimene	germacreneD	0.0878769	0.508077
trans_beta_ocimene	germacreneD	0.244385	0.062127
germacreneA	germacreneD	0.00589097	0.96468
germacreneB	germacreneD	-0.0491819	0.711446
Sepidermidis	bicyclogermacrene	-0.201156	0.126583
linalool	bicyclogermacrene	0.0118303	0.929138
camphene	bicyclogermacrene	-0.142357	0.282126
camphor	bicyclogermacrene	-0.0810327	0.541788
alpha_phellandrene	bicyclogermacrene	0.017159	0.897365
beta_phellandrene	bicyclogermacrene	0.0923443	0.486666
ortho_cymene	bicyclogermacrene	0.0136215	0.918443
alpha_pinene	bicyclogermacrene	-0.252546	0.053638
beta_pinene	bicyclogermacrene	-0.102501	0.439808
sabinene	bicyclogermacrene	0.321218	0.0131141
gamma_cadinene	bicyclogermacrene	-0.115573	0.383393
myrcene	bicyclogermacrene	-0.0336336	0.800354
delta_3_carene	bicyclogermacrene	0.131474	0.320914
X1_8_cineole	bicyclogermacrene	-0.0810327	0.541788
verbenone	bicyclogermacrene	-0.114931	0.386059
limonene	bicyclogermacrene	-0.230935	0.078448
cis_beta_ocimene	bicyclogermacrene	-0.0810327	0.541788
trans_beta_ocimene	bicyclogermacrene	0.137064	0.300586
germacreneA	bicyclogermacrene	0.255186	0.0511037
germacreneB	bicyclogermacrene	-0.141808	0.284003
germacreneD	bicyclogermacrene	0.27273	0.0366309
Sepidermidis	X1_10_di_epi_cubenol	-0.059292	0.65554
linalool	X1_10_di_epi_cubenol	-0.0303227	0.81966
camphene	X1_10_di_epi_cubenol	-0.0302893	0.819855
camphor	X1_10_di_epi_cubenol	-0.0172414	0.896875
alpha_phellandrene	X1_10_di_epi_cubenol	-0.024595	0.853305
beta_phellandrene	X1_10_di_epi_cubenol	-0.0476043	0.720317
ortho_cymene	X1_10_di_epi_cubenol	-0.0245918	0.853323
alpha_pinene	X1_10_di_epi_cubenol	-0.114217	0.389035
beta_pinene	X1_10_di_epi_cubenol	-0.0706334	0.595002
sabinene	X1_10_di_epi_cubenol	-0.0245417	0.853619
gamma_cadinene	X1_10_di_epi_cubenol	0.715871	1.85572e-10
myrcene	X1_10_di_epi_cubenol	-0.0342145	0.796979
delta_3_carene	X1_10_di_epi_cubenol	-0.0287092	0.829108
X1_8_cineole	X1_10_di_epi_cubenol	-0.0172414	0.896875
verbenone	X1_10_di_epi_cubenol	-0.0244538	0.854137
limonene	X1_10_di_epi_cubenol	-0.0491362	0.711703
cis_beta_ocimene	X1_10_di_epi_cubenol	-0.0172414	0.896875
trans_beta_ocimene	X1_10_di_epi_cubenol	-0.0245934	0.853314
germacreneA	X1_10_di_epi_cubenol	-0.0244964	0.853887
germacreneB	X1_10_di_epi_cubenol	-0.0301727	0.820538
germacreneD	X1_10_di_epi_cubenol	0.105955	0.424466
bicyclogermacrene	X1_10_di_epi_cubenol	-0.0810327	0.541788
Sepidermidis	bulnesol	-0.0733694	0.580778
linalool	bulnesol	-0.0303227	0.81966
camphene	bulnesol	-0.0302893	0.819855
camphor	bulnesol	-0.0172414	0.896875
alpha_phellandrene	bulnesol	-0.024595	0.853305
beta_phellandrene	bulnesol	-0.0476043	0.720317
ortho_cymene	bulnesol	-0.0245918	0.853323
alpha_pinene	bulnesol	-0.114217	0.389035
beta_pinene	bulnesol	-0.0706334	0.595002
sabinene	bulnesol	-0.0245417	0.853619
gamma_cadinene	bulnesol	-0.0245905	0.853331
myrcene	bulnesol	-0.0342145	0.796979
delta_3_carene	bulnesol	-0.0287092	0.829108
X1_8_cineole	bulnesol	-0.0172414	0.896875
verbenone	bulnesol	-0.0244538	0.854137
limonene	bulnesol	0.416293	0.00104018
cis_beta_ocimene	bulnesol	-0.0172414	0.896875
trans_beta_ocimene	bulnesol	0.690707	1.41442e-09
germacreneA	bulnesol	-0.0244964	0.853887
germacreneB	bulnesol	-0.0301727	0.820538
germacreneD	bulnesol	0.112602	0.395817
bicyclogermacrene	bulnesol	-0.0810327	0.541788
X1_10_di_epi_cubenol	bulnesol	-0.0172414	0.896875
Sepidermidis	cis_beta_guaiene	-0.168231	0.202783
linalool	cis_beta_guaiene	-0.069528	0.600792
camphene	cis_beta_guaiene	-0.0694515	0.601194
camphor	cis_beta_guaiene	-0.0395334	0.766252
alpha_phellandrene	cis_beta_guaiene	-0.0563947	0.671387
beta_phellandrene	cis_beta_guaiene	-0.109154	0.410537
ortho_cymene	cis_beta_guaiene	0.272797	0.0365832
alpha_pinene	cis_beta_guaiene	-0.0312961	0.813973
beta_pinene	cis_beta_guaiene	0.141904	0.283676
sabinene	cis_beta_guaiene	-0.0562725	0.672058
gamma_cadinene	cis_beta_guaiene	0.260252	0.0465128
myrcene	cis_beta_guaiene	0.103917	0.433482
delta_3_carene	cis_beta_guaiene	-0.0658284	0.620348
X1_8_cineole	cis_beta_guaiene	-0.0395334	0.766252
verbenone	cis_beta_guaiene	0.231352	0.0778946
limonene	cis_beta_guaiene	-0.112666	0.395549
cis_beta_ocimene	cis_beta_guaiene	-0.0395334	0.766252
trans_beta_ocimene	cis_beta_guaiene	-0.0563912	0.671406
germacreneA	cis_beta_guaiene	-0.0561686	0.67263
germacreneB	cis_beta_guaiene	-0.069184	0.602599
germacreneD	cis_beta_guaiene	0.241107	0.0658277
bicyclogermacrene	cis_beta_guaiene	-0.185803	0.158852
X1_10_di_epi_cubenol	cis_beta_guaiene	-0.0395334	0.766252
bulnesol	cis_beta_guaiene	-0.0395334	0.766252
Sepidermidis	cis_cis_farnesol	-0.0029825	0.982114
linalool	cis_cis_farnesol	-0.0303227	0.81966
camphene	cis_cis_farnesol	-0.0302893	0.819855
camphor	cis_cis_farnesol	-0.0172414	0.896875
alpha_phellandrene	cis_cis_farnesol	-0.024595	0.853305
beta_phellandrene	cis_cis_farnesol	-0.0476043	0.720317
ortho_cymene	cis_cis_farnesol	-0.0245918	0.853323
alpha_pinene	cis_cis_farnesol	-0.114217	0.389035
beta_pinene	cis_cis_farnesol	-0.0706334	0.595002
sabinene	cis_cis_farnesol	-0.0245417	0.853619
gamma_cadinene	cis_cis_farnesol	-0.0245905	0.853331
myrcene	cis_cis_farnesol	-0.0342145	0.796979
delta_3_carene	cis_cis_farnesol	-0.0287092	0.829108
X1_8_cineole	cis_cis_farnesol	-0.0172414	0.896875
verbenone	cis_cis_farnesol	-0.0244538	0.854137
limonene	cis_cis_farnesol	-0.0491362	0.711703
cis_beta_ocimene	cis_cis_farnesol	-0.0172414	0.896875
trans_beta_ocimene	cis_cis_farnesol	-0.0245934	0.853314
germacreneA	cis_cis_farnesol	-0.0244964	0.853887
germacreneB	cis_cis_farnesol	-0.0301727	0.820538
germacreneD	cis_cis_farnesol	-0.0900743	0.497485
bicyclogermacrene	cis_cis_farnesol	-0.0810327	0.541788
X1_10_di_epi_cubenol	cis_cis_farnesol	-0.0172414	0.896875
bulnesol	cis_cis_farnesol	-0.0172414	0.896875
cis_beta_guaiene	cis_cis_farnesol	-0.0395334	0.766252
Sepidermidis	trans_cis_farnesol	-0.0029825	0.982114
linalool	trans_cis_farnesol	-0.0303227	0.81966
camphene	trans_cis_farnesol	-0.0302893	0.819855
camphor	trans_cis_farnesol	-0.0172414	0.896875
alpha_phellandrene	trans_cis_farnesol	-0.024595	0.853305
beta_phellandrene	trans_cis_farnesol	-0.0476043	0.720317
ortho_cymene	trans_cis_farnesol	-0.0245918	0.853323
alpha_pinene	trans_cis_farnesol	-0.114217	0.389035
beta_pinene	trans_cis_farnesol	-0.0706334	0.595002
sabinene	trans_cis_farnesol	-0.0245417	0.853619
gamma_cadinene	trans_cis_farnesol	-0.0245905	0.853331
myrcene	trans_cis_farnesol	-0.0342145	0.796979
delta_3_carene	trans_cis_farnesol	-0.0287092	0.829108
X1_8_cineole	trans_cis_farnesol	-0.0172414	0.896875
verbenone	trans_cis_farnesol	-0.0244538	0.854137
limonene	trans_cis_farnesol	-0.0491362	0.711703
cis_beta_ocimene	trans_cis_farnesol	-0.0172414	0.896875
trans_beta_ocimene	trans_cis_farnesol	-0.0245934	0.853314
germacreneA	trans_cis_farnesol	-0.0244964	0.853887
germacreneB	trans_cis_farnesol	-0.0301727	0.820538
germacreneD	trans_cis_farnesol	-0.0900743	0.497485
bicyclogermacrene	trans_cis_farnesol	-0.0810327	0.541788
X1_10_di_epi_cubenol	trans_cis_farnesol	-0.0172414	0.896875
bulnesol	trans_cis_farnesol	-0.0172414	0.896875
cis_beta_guaiene	trans_cis_farnesol	-0.0395334	0.766252
cis_cis_farnesol	trans_cis_farnesol	1	0
Sepidermidis	trans_beta_guaiene	-0.0848719	0.522745
linalool	trans_beta_guaiene	-0.0761031	0.566724
camphene	trans_beta_guaiene	-0.0760193	0.567152
camphor	trans_beta_guaiene	-0.0432719	0.744864
alpha_phellandrene	trans_beta_guaiene	0.218216	0.0968416
beta_phellandrene	trans_beta_guaiene	0.0471245	0.723022
ortho_cymene	trans_beta_guaiene	0.210733	0.109136
alpha_pinene	trans_beta_guaiene	-0.205031	0.119286
beta_pinene	trans_beta_guaiene	-0.0966604	0.466439
sabinene	trans_beta_guaiene	-0.061594	0.643056
gamma_cadinene	trans_beta_guaiene	0.276123	0.0342675
myrcene	trans_beta_guaiene	0.0764029	0.565192
delta_3_carene	trans_beta_guaiene	-0.0720535	0.5876
X1_8_cineole	trans_beta_guaiene	-0.0432719	0.744864
verbenone	trans_beta_guaiene	-0.0613735	0.644247
limonene	trans_beta_guaiene	-0.12332	0.352095
cis_beta_ocimene	trans_beta_guaiene	-0.0432719	0.744864
trans_beta_ocimene	trans_beta_guaiene	-0.0617239	0.642355
germacreneA	trans_beta_guaiene	-0.0614802	0.643671
germacreneB	trans_beta_guaiene	0.17261	0.191107
germacreneD	trans_beta_guaiene	-0.0204715	0.877692
bicyclogermacrene	trans_beta_guaiene	-0.132816	0.315957
X1_10_di_epi_cubenol	trans_beta_guaiene	0.42085	0.000903263
bulnesol	trans_beta_guaiene	-0.0432719	0.744864
cis_beta_guaiene	trans_beta_guaiene	-0.0992197	0.454664
cis_cis_farnesol	trans_beta_guaiene	-0.0432719	0.744864
trans_cis_farnesol	trans_beta_guaiene	-0.0432719	0.744864
Sepidermidis	trans_caryophyllene	0.0167445	0.899832
linalool	trans_caryophyllene	0.139356	0.292499
camphene	trans_caryophyllene	-0.171934	0.192877
camphor	trans_caryophyllene	-0.0978688	0.460859
alpha_phellandrene	trans_caryophyllene	0.00440074	0.973611
beta_phellandrene	trans_caryophyllene	-0.270221	0.038464
ortho_cymene	trans_caryophyllene	0.18984	0.149833
alpha_pinene	trans_caryophyllene	-0.242063	0.0647302
beta_pinene	trans_caryophyllene	-0.103853	0.433767
sabinene	trans_caryophyllene	-0.139308	0.292665
gamma_cadinene	trans_caryophyllene	0.198034	0.132706
myrcene	trans_caryophyllene	-0.0893562	0.500934
delta_3_carene	trans_caryophyllene	0.0780817	0.556651
X1_8_cineole	trans_caryophyllene	-0.0978688	0.460859
verbenone	trans_caryophyllene	0.0264536	0.842355
limonene	trans_caryophyllene	-0.167367	0.205146
cis_beta_ocimene	trans_caryophyllene	0.158258	0.231245
trans_beta_ocimene	trans_caryophyllene	0.0732443	0.581425
germacreneA	trans_caryophyllene	0.117676	0.374737
germacreneB	trans_caryophyllene	0.0141119	0.915518
germacreneD	trans_caryophyllene	0.366587	0.00429417
bicyclogermacrene	trans_caryophyllene	0.30364	0.0193927
X1_10_di_epi_cubenol	trans_caryophyllene	0.115837	0.382298
bulnesol	trans_caryophyllene	-0.0978688	0.460859
cis_beta_guaiene	trans_caryophyllene	0.242832	0.0638594
cis_cis_farnesol	trans_caryophyllene	-0.0978688	0.460859
trans_cis_farnesol	trans_caryophyllene	-0.0978688	0.460859
trans_beta_guaiene	trans_caryophyllene	0.0153779	0.90797
Sepidermidis	caryophyllene_oxide	0.247132	0.0591566
linalool	caryophyllene_oxide	-0.107251	0.41879
camphene	caryophyllene_oxide	-0.107133	0.419305
camphor	caryophyllene_oxide	-0.0609827	0.646362
alpha_phellandrene	caryophyllene_oxide	-0.0869923	0.512373
beta_phellandrene	caryophyllene_oxide	-0.168377	0.202388
ortho_cymene	caryophyllene_oxide	-0.0869812	0.512427
alpha_pinene	caryophyllene_oxide	-0.20269	0.123655
beta_pinene	caryophyllene_oxide	-0.0854851	0.519735
sabinene	caryophyllene_oxide	-0.0868039	0.51329
gamma_cadinene	caryophyllene_oxide	-0.0869765	0.51245
myrcene	caryophyllene_oxide	-0.121017	0.361233
delta_3_carene	caryophyllene_oxide	0.122749	0.354346
X1_8_cineole	caryophyllene_oxide	-0.0609827	0.646362
verbenone	caryophyllene_oxide	-0.0864932	0.514805
limonene	caryophyllene_oxide	-0.173794	0.188032
cis_beta_ocimene	caryophyllene_oxide	-0.0609827	0.646362
trans_beta_ocimene	caryophyllene_oxide	-0.0869869	0.512399
germacreneA	caryophyllene_oxide	-0.0866436	0.514072
germacreneB	caryophyllene_oxide	0.113159	0.393473
germacreneD	caryophyllene_oxide	-0.0421079	0.751504
bicyclogermacrene	caryophyllene_oxide	0.0695413	0.600722
X1_10_di_epi_cubenol	caryophyllene_oxide	-0.0609827	0.646362
bulnesol	caryophyllene_oxide	-0.0609827	0.646362
cis_beta_guaiene	caryophyllene_oxide	-0.00630442	0.962203
cis_cis_farnesol	caryophyllene_oxide	-0.0609827	0.646362
trans_cis_farnesol	caryophyllene_oxide	-0.0609827	0.646362
trans_beta_guaiene	caryophyllene_oxide	-0.0540171	0.684498
trans_caryophyllene	caryophyllene_oxide	0.507902	4.02065e-05
Sepidermidis	spathulenol	0.0368339	0.781805
linalool	spathulenol	-0.0464697	0.72672
camphene	spathulenol	-0.153386	0.246108
camphor	spathulenol	-0.087311	0.510823
alpha_phellandrene	spathulenol	-0.12455	0.347278
beta_phellandrene	spathulenol	-0.0961775	0.468679
ortho_cymene	spathulenol	-0.124534	0.34734
alpha_pinene	spathulenol	-0.439233	0.000500832
beta_pinene	spathulenol	-0.307203	0.0179462
sabinene	spathulenol	0.191135	0.147022
gamma_cadinene	spathulenol	-0.124527	0.347366
myrcene	spathulenol	-0.0908123	0.493954
delta_3_carene	spathulenol	0.121352	0.359893
X1_8_cineole	spathulenol	0.292301	0.0246734
verbenone	spathulenol	0.173938	0.187662
limonene	spathulenol	-0.248828	0.0573813
cis_beta_ocimene	spathulenol	-0.087311	0.510823
trans_beta_ocimene	spathulenol	0.0100699	0.939662
germacreneA	spathulenol	0.031693	0.811656
germacreneB	spathulenol	0.0324863	0.807032
germacreneD	spathulenol	0.0210502	0.874262
bicyclogermacrene	spathulenol	0.302604	0.0198314
X1_10_di_epi_cubenol	spathulenol	-0.087311	0.510823
bulnesol	spathulenol	-0.087311	0.510823
cis_beta_guaiene	spathulenol	-0.041068	0.757451
cis_cis_farnesol	spathulenol	-0.087311	0.510823
trans_cis_farnesol	spathulenol	-0.087311	0.510823
trans_beta_guaiene	spathulenol	0.0393915	0.767068
trans_caryophyllene	spathulenol	0.199944	0.128935
caryophyllene_oxide	spathulenol	0.422116	0.000868234
Sepidermidis	valencene	-0.0029825	0.982114
linalool	valencene	-0.0303227	0.81966
camphene	valencene	-0.0302893	0.819855
camphor	valencene	-0.0172414	0.896875
alpha_phellandrene	valencene	-0.024595	0.853305
beta_phellandrene	valencene	-0.0476043	0.720317
ortho_cymene	valencene	-0.0245918	0.853323
alpha_pinene	valencene	0.0581237	0.661912
beta_pinene	valencene	-0.0706334	0.595002
sabinene	valencene	-0.0245417	0.853619
gamma_cadinene	valencene	-0.0245905	0.853331
myrcene	valencene	-0.0342145	0.796979
delta_3_carene	valencene	-0.0287092	0.829108
X1_8_cineole	valencene	-0.0172414	0.896875
verbenone	valencene	-0.0244538	0.854137
limonene	valencene	-0.0491362	0.711703
cis_beta_ocimene	valencene	-0.0172414	0.896875
trans_beta_ocimene	valencene	-0.0245934	0.853314
germacreneA	valencene	-0.0244964	0.853887
germacreneB	valencene	-0.0301727	0.820538
germacreneD	valencene	-0.0900743	0.497485
bicyclogermacrene	valencene	-0.0810327	0.541788
X1_10_di_epi_cubenol	valencene	-0.0172414	0.896875
bulnesol	valencene	-0.0172414	0.896875
cis_beta_guaiene	valencene	-0.0395334	0.766252
cis_cis_farnesol	valencene	-0.0172414	0.896875
trans_cis_farnesol	valencene	-0.0172414	0.896875
trans_beta_guaiene	valencene	-0.0432719	0.744864
trans_caryophyllene	valencene	-0.0978688	0.460859
caryophyllene_oxide	valencene	-0.0609827	0.646362
spathulenol	valencene	0.190827	0.147688
Sepidermidis	ar.curcumene	0.771274	8.84404e-13
linalool	ar.curcumene	-0.0303227	0.81966
camphene	ar.curcumene	-0.0302893	0.819855
camphor	ar.curcumene	-0.0172414	0.896875
alpha_phellandrene	ar.curcumene	-0.024595	0.853305
beta_phellandrene	ar.curcumene	-0.0476043	0.720317
ortho_cymene	ar.curcumene	-0.0245918	0.853323
alpha_pinene	ar.curcumene	-0.114217	0.389035
beta_pinene	ar.curcumene	-0.0706334	0.595002
sabinene	ar.curcumene	-0.0245417	0.853619
gamma_cadinene	ar.curcumene	-0.0245905	0.853331
myrcene	ar.curcumene	-0.0342145	0.796979
delta_3_carene	ar.curcumene	-0.0287092	0.829108
X1_8_cineole	ar.curcumene	-0.0172414	0.896875
verbenone	ar.curcumene	-0.0244538	0.854137
limonene	ar.curcumene	-0.0491362	0.711703
cis_beta_ocimene	ar.curcumene	-0.0172414	0.896875
trans_beta_ocimene	ar.curcumene	-0.0245934	0.853314
germacreneA	ar.curcumene	-0.0244964	0.853887
germacreneB	ar.curcumene	-0.0301727	0.820538
germacreneD	ar.curcumene	-0.0900743	0.497485
bicyclogermacrene	ar.curcumene	-0.0810327	0.541788
X1_10_di_epi_cubenol	ar.curcumene	-0.0172414	0.896875
bulnesol	ar.curcumene	-0.0172414	0.896875
cis_beta_guaiene	ar.curcumene	-0.0395334	0.766252
cis_cis_farnesol	ar.curcumene	-0.0172414	0.896875
trans_cis_farnesol	ar.curcumene	-0.0172414	0.896875
trans_beta_guaiene	ar.curcumene	-0.0432719	0.744864
trans_caryophyllene	ar.curcumene	0.103122	0.437027
caryophyllene_oxide	ar.curcumene	0.323761	0.0123697
spathulenol	ar.curcumene	0.288631	0.0266233
valencene	ar.curcumene	-0.0172414	0.896875
Sepidermidis	junipene	0.771274	8.84404e-13
linalool	junipene	-0.0303227	0.81966
camphene	junipene	-0.0302893	0.819855
camphor	junipene	-0.0172414	0.896875
alpha_phellandrene	junipene	-0.024595	0.853305
beta_phellandrene	junipene	-0.0476043	0.720317
ortho_cymene	junipene	-0.0245918	0.853323
alpha_pinene	junipene	-0.114217	0.389035
beta_pinene	junipene	-0.0706334	0.595002
sabinene	junipene	-0.0245417	0.853619
gamma_cadinene	junipene	-0.0245905	0.853331
myrcene	junipene	-0.0342145	0.796979
delta_3_carene	junipene	-0.0287092	0.829108
X1_8_cineole	junipene	-0.0172414	0.896875
verbenone	junipene	-0.0244538	0.854137
limonene	junipene	-0.0491362	0.711703
cis_beta_ocimene	junipene	-0.0172414	0.896875
trans_beta_ocimene	junipene	-0.0245934	0.853314
germacreneA	junipene	-0.0244964	0.853887
germacreneB	junipene	-0.0301727	0.820538
germacreneD	junipene	-0.0900743	0.497485
bicyclogermacrene	junipene	-0.0810327	0.541788
X1_10_di_epi_cubenol	junipene	-0.0172414	0.896875
bulnesol	junipene	-0.0172414	0.896875
cis_beta_guaiene	junipene	-0.0395334	0.766252
cis_cis_farnesol	junipene	-0.0172414	0.896875
trans_cis_farnesol	junipene	-0.0172414	0.896875
trans_beta_guaiene	junipene	-0.0432719	0.744864
trans_caryophyllene	junipene	0.103122	0.437027
caryophyllene_oxide	junipene	0.323761	0.0123697
spathulenol	junipene	0.288631	0.0266233
valencene	junipene	-0.0172414	0.896875
ar.curcumene	junipene	1	0
Sepidermidis	alpha_selinene	-0.00562981	0.966245
linalool	alpha_selinene	0.250897	0.0552726
camphene	alpha_selinene	-0.0411917	0.756742
camphor	alpha_selinene	-0.0234473	0.86008
alpha_phellandrene	alpha_selinene	-0.0334477	0.801435
beta_phellandrene	alpha_selinene	-0.0647391	0.626157
ortho_cymene	alpha_selinene	-0.0334434	0.80146
alpha_pinene	alpha_selinene	-0.0463837	0.727206
beta_pinene	alpha_selinene	-0.0960573	0.469238
sabinene	alpha_selinene	-0.0333753	0.801857
gamma_cadinene	alpha_selinene	-0.0334416	0.801471
myrcene	alpha_selinene	-0.0465297	0.726381
delta_3_carene	alpha_selinene	-0.0390428	0.769072
X1_8_cineole	alpha_selinene	-0.0234473	0.86008
verbenone	alpha_selinene	-0.0332558	0.802551
limonene	alpha_selinene	0.0287586	0.828819
cis_beta_ocimene	alpha_selinene	-0.0234473	0.86008
trans_beta_ocimene	alpha_selinene	-0.0334456	0.801447
germacreneA	alpha_selinene	-0.0333136	0.802215
germacreneB	alpha_selinene	-0.0410331	0.757651
germacreneD	alpha_selinene	-0.122496	0.355349
bicyclogermacrene	alpha_selinene	-0.1102	0.406039
X1_10_di_epi_cubenol	alpha_selinene	-0.0234473	0.86008
bulnesol	alpha_selinene	-0.0234473	0.86008
cis_beta_guaiene	alpha_selinene	-0.0537631	0.685905
cis_cis_farnesol	alpha_selinene	-0.0234473	0.86008
trans_cis_farnesol	alpha_selinene	-0.0234473	0.86008
trans_beta_guaiene	alpha_selinene	-0.0588473	0.657963
trans_caryophyllene	alpha_selinene	0.191187	0.146909
caryophyllene_oxide	alpha_selinene	0.168558	0.201895
spathulenol	alpha_selinene	0.157691	0.232943
valencene	alpha_selinene	-0.0234473	0.86008
ar.curcumene	alpha_selinene	-0.0234473	0.86008
junipene	alpha_selinene	-0.0234473	0.86008
Sepidermidis	beta_selinene	-0.0029825	0.982114
linalool	beta_selinene	-0.0303227	0.81966
camphene	beta_selinene	-0.0302893	0.819855
camphor	beta_selinene	-0.0172414	0.896875
alpha_phellandrene	beta_selinene	0.707381	3.77058e-10
beta_phellandrene	beta_selinene	-0.0476043	0.720317
ortho_cymene	beta_selinene	0.687798	1.76538e-09
alpha_pinene	beta_selinene	-0.114217	0.389035
beta_pinene	beta_selinene	-0.0706334	0.595002
sabinene	beta_selinene	-0.0245417	0.853619
gamma_cadinene	beta_selinene	-0.0245905	0.853331
myrcene	beta_selinene	-0.0342145	0.796979
delta_3_carene	beta_selinene	-0.0287092	0.829108
X1_8_cineole	beta_selinene	-0.0172414	0.896875
verbenone	beta_selinene	-0.0244538	0.854137
limonene	beta_selinene	-0.0491362	0.711703
cis_beta_ocimene	beta_selinene	-0.0172414	0.896875
trans_beta_ocimene	beta_selinene	-0.0245934	0.853314
germacreneA	beta_selinene	-0.0244964	0.853887
germacreneB	beta_selinene	-0.0301727	0.820538
germacreneD	beta_selinene	-0.0900743	0.497485
bicyclogermacrene	beta_selinene	0.103456	0.435535
X1_10_di_epi_cubenol	beta_selinene	-0.0172414	0.896875
bulnesol	beta_selinene	-0.0172414	0.896875
cis_beta_guaiene	beta_selinene	-0.0395334	0.766252
cis_cis_farnesol	beta_selinene	-0.0172414	0.896875
trans_cis_farnesol	beta_selinene	-0.0172414	0.896875
trans_beta_guaiene	beta_selinene	0.345771	0.00731005
trans_caryophyllene	beta_selinene	0.102266	0.440861
caryophyllene_oxide	beta_selinene	-0.0609827	0.646362
spathulenol	beta_selinene	-0.087311	0.510823
valencene	beta_selinene	-0.0172414	0.896875
ar.curcumene	beta_selinene	-0.0172414	0.896875
junipene	beta_selinene	-0.0172414	0.896875
alpha_selinene	beta_selinene	-0.0234473	0.86008
Sepidermidis	guaiol	-0.0733694	0.580778
linalool	guaiol	-0.0303227	0.81966
camphene	guaiol	-0.0302893	0.819855
camphor	guaiol	-0.0172414	0.896875
alpha_phellandrene	guaiol	-0.024595	0.853305
beta_phellandrene	guaiol	-0.0476043	0.720317
ortho_cymene	guaiol	-0.0245918	0.853323
alpha_pinene	guaiol	0.112072	0.398061
beta_pinene	guaiol	0.217484	0.0979942
sabinene	guaiol	-0.0245417	0.853619
gamma_cadinene	guaiol	-0.0245905	0.853331
myrcene	guaiol	-0.0342145	0.796979
delta_3_carene	guaiol	-0.0287092	0.829108
X1_8_cineole	guaiol	-0.0172414	0.896875
verbenone	guaiol	-0.0244538	0.854137
limonene	guaiol	-0.0491362	0.711703
cis_beta_ocimene	guaiol	-0.0172414	0.896875
trans_beta_ocimene	guaiol	-0.0245934	0.853314
germacreneA	guaiol	-0.0244964	0.853887
germacreneB	guaiol	-0.0301727	0.820538
germacreneD	guaiol	0.142145	0.282851
bicyclogermacrene	guaiol	0.0850377	0.52193
X1_10_di_epi_cubenol	guaiol	-0.0172414	0.896875
bulnesol	guaiol	-0.0172414	0.896875
cis_beta_guaiene	guaiol	-0.0395334	0.766252
cis_cis_farnesol	guaiol	-0.0172414	0.896875
trans_cis_farnesol	guaiol	-0.0172414	0.896875
trans_beta_guaiene	guaiol	-0.0432719	0.744864
trans_caryophyllene	guaiol	0.143799	0.277228
caryophyllene_oxide	guaiol	-0.0609827	0.646362
spathulenol	guaiol	-0.087311	0.510823
valencene	guaiol	-0.0172414	0.896875
ar.curcumene	guaiol	-0.0172414	0.896875
junipene	guaiol	-0.0172414	0.896875
alpha_selinene	guaiol	-0.0234473	0.86008
beta_selinene	guaiol	-0.0172414	0.896875
Sepidermidis	beta_elemene	-0.00927884	0.944394
linalool	beta_elemene	0.254399	0.0518491
camphene	beta_elemene	-0.0531834	0.689118
camphor	beta_elemene	-0.0302732	0.81995
alpha_phellandrene	beta_elemene	-0.0431849	0.74536
beta_phellandrene	beta_elemene	-0.0835859	0.529086
ortho_cymene	beta_elemene	-0.0431794	0.745391
alpha_pinene	beta_elemene	-0.200547	0.127761
beta_pinene	beta_elemene	0.0901626	0.497062
sabinene	beta_elemene	-0.0430914	0.745893
gamma_cadinene	beta_elemene	0.351829	0.00628387
myrcene	beta_elemene	-0.0600753	0.651281
delta_3_carene	beta_elemene	-0.050409	0.704573
X1_8_cineole	beta_elemene	-0.0302732	0.81995
verbenone	beta_elemene	-0.0429372	0.746772
limonene	beta_elemene	-0.0862755	0.515867
cis_beta_ocimene	beta_elemene	-0.0302732	0.81995
trans_beta_ocimene	beta_elemene	-0.0431823	0.745375
germacreneA	beta_elemene	0.834887	2.22045e-16
germacreneB	beta_elemene	-0.0529786	0.690255
germacreneD	beta_elemene	0.0815924	0.538991
bicyclogermacrene	beta_elemene	0.170041	0.197897
X1_10_di_epi_cubenol	beta_elemene	0.512383	3.345e-05
bulnesol	beta_elemene	-0.0302732	0.81995
cis_beta_guaiene	beta_elemene	-0.0694145	0.601388
cis_cis_farnesol	beta_elemene	-0.0302732	0.81995
trans_cis_farnesol	beta_elemene	-0.0302732	0.81995
trans_beta_guaiene	beta_elemene	0.171611	0.193727
trans_caryophyllene	beta_elemene	0.130932	0.322932
caryophyllene_oxide	beta_elemene	-0.107076	0.419554
spathulenol	beta_elemene	-0.0387866	0.770546
valencene	beta_elemene	-0.0302732	0.81995
ar.curcumene	beta_elemene	-0.0302732	0.81995
junipene	beta_elemene	-0.0302732	0.81995
alpha_selinene	beta_elemene	-0.0411698	0.756868
beta_selinene	beta_elemene	-0.0302732	0.81995
guaiol	beta_elemene	-0.0302732	0.81995
Sepidermidis	trans_yophyllene	0.0674044	0.611984
linalool	trans_yophyllene	-0.0303227	0.81966
camphene	trans_yophyllene	-0.0302893	0.819855
camphor	trans_yophyllene	-0.0172414	0.896875
alpha_phellandrene	trans_yophyllene	-0.024595	0.853305
beta_phellandrene	trans_yophyllene	-0.0476043	0.720317
ortho_cymene	trans_yophyllene	-0.0245918	0.853323
alpha_pinene	trans_yophyllene	-0.114217	0.389035
beta_pinene	trans_yophyllene	0.25702	0.0494002
sabinene	trans_yophyllene	-0.0245417	0.853619
gamma_cadinene	trans_yophyllene	-0.0245905	0.853331
myrcene	trans_yophyllene	-0.0342145	0.796979
delta_3_carene	trans_yophyllene	-0.0287092	0.829108
X1_8_cineole	trans_yophyllene	-0.0172414	0.896875
verbenone	trans_yophyllene	-0.0244538	0.854137
limonene	trans_yophyllene	-0.0491362	0.711703
cis_beta_ocimene	trans_yophyllene	-0.0172414	0.896875
trans_beta_ocimene	trans_yophyllene	-0.0245934	0.853314
germacreneA	trans_yophyllene	0.634031	7.01006e-08
germacreneB	trans_yophyllene	-0.0301727	0.820538
germacreneD	trans_yophyllene	0.116714	0.378682
bicyclogermacrene	trans_yophyllene	0.144252	0.275703
X1_10_di_epi_cubenol	trans_yophyllene	-0.0172414	0.896875
bulnesol	trans_yophyllene	-0.0172414	0.896875
cis_beta_guaiene	trans_yophyllene	-0.0395334	0.766252
cis_cis_farnesol	trans_yophyllene	-0.0172414	0.896875
trans_cis_farnesol	trans_yophyllene	-0.0172414	0.896875
trans_beta_guaiene	trans_yophyllene	-0.0432719	0.744864
trans_caryophyllene	trans_yophyllene	-0.0978688	0.460859
caryophyllene_oxide	trans_yophyllene	-0.0609827	0.646362
spathulenol	trans_yophyllene	-0.087311	0.510823
valencene	trans_yophyllene	-0.0172414	0.896875
ar.curcumene	trans_yophyllene	-0.0172414	0.896875
junipene	trans_yophyllene	-0.0172414	0.896875
alpha_selinene	trans_yophyllene	-0.0234473	0.86008
beta_selinene	trans_yophyllene	-0.0172414	0.896875
guaiol	trans_yophyllene	-0.0172414	0.896875
beta_elemene	trans_yophyllene	0.634687	6.73072e-08
Sepidermidis	gamma_muurolene	-0.0274389	0.836563
linalool	gamma_muurolene	0.150626	0.254812
camphene	gamma_muurolene	-0.0597445	0.653079
camphor	gamma_muurolene	-0.0340079	0.798179
alpha_phellandrene	gamma_muurolene	-0.0485125	0.715206
beta_phellandrene	gamma_muurolene	0.0196713	0.882438
ortho_cymene	gamma_muurolene	-0.0485063	0.71524
alpha_pinene	gamma_muurolene	-0.225288	0.0862398
beta_pinene	gamma_muurolene	-0.139321	0.292619
sabinene	gamma_muurolene	0.232607	0.0762503
gamma_cadinene	gamma_muurolene	-0.0485037	0.715255
myrcene	gamma_muurolene	0.0890322	0.502494
delta_3_carene	gamma_muurolene	-0.0566277	0.670107
X1_8_cineole	gamma_muurolene	-0.0340079	0.798179
verbenone	gamma_muurolene	-0.0482342	0.716771
limonene	gamma_muurolene	-0.096919	0.465242
cis_beta_ocimene	gamma_muurolene	-0.0340079	0.798179
trans_beta_ocimene	gamma_muurolene	-0.0485095	0.715222
germacreneA	gamma_muurolene	0.257737	0.0487476
germacreneB	gamma_muurolene	-0.0595144	0.65433
germacreneD	gamma_muurolene	-0.177668	0.178228
bicyclogermacrene	gamma_muurolene	0.0627754	0.636687
X1_10_di_epi_cubenol	gamma_muurolene	-0.0340079	0.798179
bulnesol	gamma_muurolene	-0.0340079	0.798179
cis_beta_guaiene	gamma_muurolene	-0.077978	0.557177
cis_cis_farnesol	gamma_muurolene	-0.0340079	0.798179
trans_cis_farnesol	gamma_muurolene	-0.0340079	0.798179
trans_beta_guaiene	gamma_muurolene	0.339026	0.0086222
trans_caryophyllene	gamma_muurolene	0.0614254	0.643967
caryophyllene_oxide	gamma_muurolene	0.0221831	0.867554
spathulenol	gamma_muurolene	0.31922	0.0137258
valencene	gamma_muurolene	-0.0340079	0.798179
ar.curcumene	gamma_muurolene	-0.0340079	0.798179
junipene	gamma_muurolene	-0.0340079	0.798179
alpha_selinene	gamma_muurolene	0.411978	0.00118677
beta_selinene	gamma_muurolene	-0.0340079	0.798179
guaiol	gamma_muurolene	-0.0340079	0.798179
beta_elemene	gamma_muurolene	0.165329	0.210796
trans_yophyllene	gamma_muurolene	-0.0340079	0.798179
Sepidermidis	alpha_humulene	-0.10466	0.430181
linalool	alpha_humulene	-0.0432549	0.744961
camphene	alpha_humulene	-0.0432073	0.745232
camphor	alpha_humulene	-0.0245946	0.853307
alpha_phellandrene	alpha_humulene	-0.0350843	0.791932
beta_phellandrene	alpha_humulene	-0.0679069	0.609328
ortho_cymene	alpha_humulene	-0.0350799	0.791957
alpha_pinene	alpha_humulene	-0.162929	0.217591
beta_pinene	alpha_humulene	-0.100757	0.447667
sabinene	alpha_humulene	-0.0350084	0.792372
gamma_cadinene	alpha_humulene	-0.035078	0.791969
myrcene	alpha_humulene	-0.0488065	0.713554
delta_3_carene	alpha_humulene	0.309543	0.0170472
X1_8_cineole	alpha_humulene	-0.0245946	0.853307
verbenone	alpha_humulene	-0.0348831	0.793099
limonene	alpha_humulene	0.265317	0.0422663
cis_beta_ocimene	alpha_humulene	-0.0245946	0.853307
trans_beta_ocimene	alpha_humulene	0.480394	0.000117791
germacreneA	alpha_humulene	-0.0349437	0.792747
germacreneB	alpha_humulene	-0.0430409	0.746181
germacreneD	alpha_humulene	0.017568	0.894933
bicyclogermacrene	alpha_humulene	0.0819982	0.536967
X1_10_di_epi_cubenol	alpha_humulene	-0.0245946	0.853307
bulnesol	alpha_humulene	0.708474	3.44655e-10
cis_beta_guaiene	alpha_humulene	-0.0563938	0.671392
cis_cis_farnesol	alpha_humulene	-0.0245946	0.853307
trans_cis_farnesol	alpha_humulene	-0.0245946	0.853307
trans_beta_guaiene	alpha_humulene	-0.0617267	0.642339
trans_caryophyllene	alpha_humulene	0.10215	0.441385
caryophyllene_oxide	alpha_humulene	0.118236	0.372453
spathulenol	alpha_humulene	0.126077	0.341353
valencene	alpha_humulene	-0.0245946	0.853307
ar.curcumene	alpha_humulene	-0.0245946	0.853307
junipene	alpha_humulene	-0.0245946	0.853307
alpha_selinene	alpha_humulene	-0.0334472	0.801438
beta_selinene	alpha_humulene	-0.0245946	0.853307
guaiol	alpha_humulene	-0.0245946	0.853307
beta_elemene	alpha_humulene	-0.0431843	0.745363
trans_yophyllene	alpha_humulene	-0.0245946	0.853307
gamma_muurolene	alpha_humulene	-0.0485118	0.71521
Sepidermidis	trans_nerolidol	-0.1392	0.293044
linalool	trans_nerolidol	0.396005	0.00190481
camphene	trans_nerolidol	-0.0887425	0.503891
camphor	trans_nerolidol	-0.0505143	0.703984
alpha_phellandrene	trans_nerolidol	0.196596	0.1356
beta_phellandrene	trans_nerolidol	-0.139472	0.29209
ortho_cymene	trans_nerolidol	0.410061	0.00125765
alpha_pinene	trans_nerolidol	-0.18393	0.163169
beta_pinene	trans_nerolidol	0.0795987	0.548987
sabinene	trans_nerolidol	-0.0719029	0.588383
gamma_cadinene	trans_nerolidol	0.140189	0.289595
myrcene	trans_nerolidol	0.0219954	0.868665
delta_3_carene	trans_nerolidol	-0.0841131	0.526482
X1_8_cineole	trans_nerolidol	-0.0505143	0.703984
verbenone	trans_nerolidol	0.121008	0.361265
limonene	trans_nerolidol	0.131038	0.322536
cis_beta_ocimene	trans_nerolidol	-0.0505143	0.703984
trans_beta_ocimene	trans_nerolidol	-0.0720545	0.587595
germacreneA	trans_nerolidol	0.151363	0.252469
germacreneB	trans_nerolidol	0.0834178	0.529918
germacreneD	trans_nerolidol	-0.196436	0.135926
bicyclogermacrene	trans_nerolidol	-0.0873854	0.510461
X1_10_di_epi_cubenol	trans_nerolidol	-0.0505143	0.703984
bulnesol	trans_nerolidol	-0.0505143	0.703984
cis_beta_guaiene	trans_nerolidol	0.0196379	0.882636
cis_cis_farnesol	trans_nerolidol	-0.0505143	0.703984
trans_cis_farnesol	trans_nerolidol	-0.0505143	0.703984
trans_beta_guaiene	trans_nerolidol	0.24195	0.0648595
trans_caryophyllene	trans_nerolidol	0.0461455	0.728553
caryophyllene_oxide	trans_nerolidol	-0.079133	0.551334
spathulenol	trans_nerolidol	-0.1248	0.346302
valencene	trans_nerolidol	-0.0505143	0.703984
ar.curcumene	trans_nerolidol	-0.0505143	0.703984
junipene	trans_nerolidol	-0.0505143	0.703984
alpha_selinene	trans_nerolidol	-0.0686965	0.605164
beta_selinene	trans_nerolidol	0.32284	0.0126348
guaiol	trans_nerolidol	-0.0505143	0.703984
beta_elemene	trans_nerolidol	0.0753742	0.570455
trans_yophyllene	trans_nerolidol	-0.0505143	0.703984
gamma_muurolene	trans_nerolidol	0.0125918	0.92459
alpha_humulene	trans_nerolidol	-0.0720579	0.587577
Sepidermidis	beta_copaen_4_alpha_ol	-0.0319298	0.810275
linalool	beta_copaen_4_alpha_ol	-0.0604444	0.649278
camphene	beta_copaen_4_alpha_ol	-0.0603779	0.649639
camphor	beta_copaen_4_alpha_ol	-0.0343685	0.796085
alpha_phellandrene	beta_copaen_4_alpha_ol	-0.0490269	0.712316
beta_phellandrene	beta_copaen_4_alpha_ol	-0.0948932	0.474666
ortho_cymene	beta_copaen_4_alpha_ol	-0.0490206	0.712351
alpha_pinene	beta_copaen_4_alpha_ol	-0.166712	0.206951
beta_pinene	beta_copaen_4_alpha_ol	0.0679707	0.608991
sabinene	beta_copaen_4_alpha_ol	-0.0489207	0.712912
gamma_cadinene	beta_copaen_4_alpha_ol	-0.049018	0.712366
myrcene	beta_copaen_4_alpha_ol	-0.0682022	0.607769
delta_3_carene	beta_copaen_4_alpha_ol	-0.0572282	0.666813
X1_8_cineole	beta_copaen_4_alpha_ol	-0.0343685	0.796085
verbenone	beta_copaen_4_alpha_ol	-0.0487456	0.713896
limonene	beta_copaen_4_alpha_ol	0.182022	0.167654
cis_beta_ocimene	beta_copaen_4_alpha_ol	-0.0343685	0.796085
trans_beta_ocimene	beta_copaen_4_alpha_ol	-0.0490239	0.712333
germacreneA	beta_copaen_4_alpha_ol	-0.0488304	0.71342
germacreneB	beta_copaen_4_alpha_ol	0.234902	0.0733157
germacreneD	beta_copaen_4_alpha_ol	-0.179552	0.173595
bicyclogermacrene	beta_copaen_4_alpha_ol	-0.0119173	0.928618
X1_10_di_epi_cubenol	beta_copaen_4_alpha_ol	-0.0343685	0.796085
bulnesol	beta_copaen_4_alpha_ol	-0.0343685	0.796085
cis_beta_guaiene	beta_copaen_4_alpha_ol	-0.0788048	0.552991
cis_cis_farnesol	beta_copaen_4_alpha_ol	-0.0343685	0.796085
trans_cis_farnesol	beta_copaen_4_alpha_ol	-0.0343685	0.796085
trans_beta_guaiene	beta_copaen_4_alpha_ol	0.083821	0.527924
trans_caryophyllene	beta_copaen_4_alpha_ol	-0.195089	0.138683
caryophyllene_oxide	beta_copaen_4_alpha_ol	-0.121561	0.359059
spathulenol	beta_copaen_4_alpha_ol	-0.0471495	0.722881
valencene	beta_copaen_4_alpha_ol	-0.0343685	0.796085
ar.curcumene	beta_copaen_4_alpha_ol	-0.0343685	0.796085
junipene	beta_copaen_4_alpha_ol	-0.0343685	0.796085
alpha_selinene	beta_copaen_4_alpha_ol	-0.0467391	0.725198
beta_selinene	beta_copaen_4_alpha_ol	-0.0343685	0.796085
guaiol	beta_copaen_4_alpha_ol	-0.0343685	0.796085
beta_elemene	beta_copaen_4_alpha_ol	-0.0603458	0.649814
trans_yophyllene	beta_copaen_4_alpha_ol	-0.0343685	0.796085
gamma_muurolene	beta_copaen_4_alpha_ol	-0.0677904	0.609943
alpha_humulene	beta_copaen_4_alpha_ol	-0.0490261	0.71232
trans_nerolidol	beta_copaen_4_alpha_ol	0.383672	0.00270244
Sepidermidis	beta_gurjunene	-0.038176	0.774062
linalool	beta_gurjunene	-0.0303227	0.81966
camphene	beta_gurjunene	-0.0302893	0.819855
camphor	beta_gurjunene	-0.0172414	0.896875
alpha_phellandrene	beta_gurjunene	-0.024595	0.853305
beta_phellandrene	beta_gurjunene	-0.0476043	0.720317
ortho_cymene	beta_gurjunene	-0.0245918	0.853323
alpha_pinene	beta_gurjunene	-0.114217	0.389035
beta_pinene	beta_gurjunene	-0.0706334	0.595002
sabinene	beta_gurjunene	-0.0245417	0.853619
gamma_cadinene	beta_gurjunene	-0.0245905	0.853331
myrcene	beta_gurjunene	-0.0342145	0.796979
delta_3_carene	beta_gurjunene	-0.0287092	0.829108
X1_8_cineole	beta_gurjunene	-0.0172414	0.896875
verbenone	beta_gurjunene	-0.0244538	0.854137
limonene	beta_gurjunene	-0.0491362	0.711703
cis_beta_ocimene	beta_gurjunene	-0.0172414	0.896875
trans_beta_ocimene	beta_gurjunene	-0.0245934	0.853314
germacreneA	beta_gurjunene	-0.0244964	0.853887
germacreneB	beta_gurjunene	-0.0301727	0.820538
germacreneD	beta_gurjunene	0.140667	0.287936
bicyclogermacrene	beta_gurjunene	-0.0810327	0.541788
X1_10_di_epi_cubenol	beta_gurjunene	-0.0172414	0.896875
bulnesol	beta_gurjunene	-0.0172414	0.896875
cis_beta_guaiene	beta_gurjunene	-0.0395334	0.766252
cis_cis_farnesol	beta_gurjunene	-0.0172414	0.896875
trans_cis_farnesol	beta_gurjunene	-0.0172414	0.896875
trans_beta_guaiene	beta_gurjunene	-0.0432719	0.744864
trans_caryophyllene	beta_gurjunene	0.265632	0.0420127
caryophyllene_oxide	beta_gurjunene	0.28283	0.0299686
spathulenol	beta_gurjunene	0.114827	0.386491
valencene	beta_gurjunene	-0.0172414	0.896875
ar.curcumene	beta_gurjunene	-0.0172414	0.896875
junipene	beta_gurjunene	-0.0172414	0.896875
alpha_selinene	beta_gurjunene	-0.0234473	0.86008
beta_selinene	beta_gurjunene	-0.0172414	0.896875
guaiol	beta_gurjunene	-0.0172414	0.896875
beta_elemene	beta_gurjunene	-0.0302732	0.81995
trans_yophyllene	beta_gurjunene	-0.0172414	0.896875
gamma_muurolene	beta_gurjunene	-0.0340079	0.798179
alpha_humulene	beta_gurjunene	-0.0245946	0.853307
trans_nerolidol	beta_gurjunene	-0.0505143	0.703984
beta_copaen_4_alpha_ol	beta_gurjunene	-0.0343685	0.796085
Sepidermidis	oxygenate_sesquiterpene	-0.0733694	0.580778
linalool	oxygenate_sesquiterpene	-0.0303227	0.81966
camphene	oxygenate_sesquiterpene	-0.0302893	0.819855
camphor	oxygenate_sesquiterpene	-0.0172414	0.896875
alpha_phellandrene	oxygenate_sesquiterpene	-0.024595	0.853305
beta_phellandrene	oxygenate_sesquiterpene	-0.0476043	0.720317
ortho_cymene	oxygenate_sesquiterpene	-0.0245918	0.853323
alpha_pinene	oxygenate_sesquiterpene	0.191635	0.145947
beta_pinene	oxygenate_sesquiterpene	0.322489	0.0127375
sabinene	oxygenate_sesquiterpene	-0.0245417	0.853619
gamma_cadinene	oxygenate_sesquiterpene	-0.0245905	0.853331
myrcene	oxygenate_sesquiterpene	-0.0342145	0.796979
delta_3_carene	oxygenate_sesquiterpene	-0.0287092	0.829108
X1_8_cineole	oxygenate_sesquiterpene	-0.0172414	0.896875
verbenone	oxygenate_sesquiterpene	-0.0244538	0.854137
limonene	oxygenate_sesquiterpene	-0.0491362	0.711703
cis_beta_ocimene	oxygenate_sesquiterpene	-0.0172414	0.896875
trans_beta_ocimene	oxygenate_sesquiterpene	-0.0245934	0.853314
germacreneA	oxygenate_sesquiterpene	-0.0244964	0.853887
germacreneB	oxygenate_sesquiterpene	-0.0301727	0.820538
germacreneD	oxygenate_sesquiterpene	-0.0900743	0.497485
bicyclogermacrene	oxygenate_sesquiterpene	0.20326	0.12258
X1_10_di_epi_cubenol	oxygenate_sesquiterpene	-0.0172414	0.896875
bulnesol	oxygenate_sesquiterpene	-0.0172414	0.896875
cis_beta_guaiene	oxygenate_sesquiterpene	-0.0395334	0.766252
cis_cis_farnesol	oxygenate_sesquiterpene	-0.0172414	0.896875
trans_cis_farnesol	oxygenate_sesquiterpene	-0.0172414	0.896875
trans_beta_guaiene	oxygenate_sesquiterpene	-0.0432719	0.744864
trans_caryophyllene	oxygenate_sesquiterpene	-0.0978688	0.460859
caryophyllene_oxide	oxygenate_sesquiterpene	-0.0609827	0.646362
spathulenol	oxygenate_sesquiterpene	-0.087311	0.510823
valencene	oxygenate_sesquiterpene	-0.0172414	0.896875
ar.curcumene	oxygenate_sesquiterpene	-0.0172414	0.896875
junipene	oxygenate_sesquiterpene	-0.0172414	0.896875
alpha_selinene	oxygenate_sesquiterpene	-0.0234473	0.86008
beta_selinene	oxygenate_sesquiterpene	-0.0172414	0.896875
guaiol	oxygenate_sesquiterpene	-0.0172414	0.896875
beta_elemene	oxygenate_sesquiterpene	-0.0302732	0.81995
trans_yophyllene	oxygenate_sesquiterpene	-0.0172414	0.896875
gamma_muurolene	oxygenate_sesquiterpene	-0.0340079	0.798179
alpha_humulene	oxygenate_sesquiterpene	-0.0245946	0.853307
trans_nerolidol	oxygenate_sesquiterpene	-0.0505143	0.703984
beta_copaen_4_alpha_ol	oxygenate_sesquiterpene	-0.0343685	0.796085
beta_gurjunene	oxygenate_sesquiterpene	-0.0172414	0.896875
Sepidermidis	delta_cadinene	-0.0733694	0.580778
linalool	delta_cadinene	0.593603	7.22571e-07
camphene	delta_cadinene	-0.0302893	0.819855
camphor	delta_cadinene	-0.0172414	0.896875
alpha_phellandrene	delta_cadinene	-0.024595	0.853305
beta_phellandrene	delta_cadinene	-0.0476043	0.720317
ortho_cymene	delta_cadinene	-0.0245918	0.853323
alpha_pinene	delta_cadinene	0.118461	0.371535
beta_pinene	delta_cadinene	-0.0706334	0.595002
sabinene	delta_cadinene	-0.0245417	0.853619
gamma_cadinene	delta_cadinene	-0.0245905	0.853331
myrcene	delta_cadinene	-0.0342145	0.796979
delta_3_carene	delta_cadinene	-0.0287092	0.829108
X1_8_cineole	delta_cadinene	-0.0172414	0.896875
verbenone	delta_cadinene	-0.0244538	0.854137
limonene	delta_cadinene	0.155001	0.241114
cis_beta_ocimene	delta_cadinene	-0.0172414	0.896875
trans_beta_ocimene	delta_cadinene	-0.0245934	0.853314
germacreneA	delta_cadinene	-0.0244964	0.853887
germacreneB	delta_cadinene	-0.0301727	0.820538
germacreneD	delta_cadinene	-0.0900743	0.497485
bicyclogermacrene	delta_cadinene	-0.0810327	0.541788
X1_10_di_epi_cubenol	delta_cadinene	-0.0172414	0.896875
bulnesol	delta_cadinene	-0.0172414	0.896875
cis_beta_guaiene	delta_cadinene	-0.0395334	0.766252
cis_cis_farnesol	delta_cadinene	-0.0172414	0.896875
trans_cis_farnesol	delta_cadinene	-0.0172414	0.896875
trans_beta_guaiene	delta_cadinene	-0.0432719	0.744864
trans_caryophyllene	delta_cadinene	0.122168	0.356648
caryophyllene_oxide	delta_cadinene	-0.0609827	0.646362
spathulenol	delta_cadinene	-0.087311	0.510823
valencene	delta_cadinene	-0.0172414	0.896875
ar.curcumene	delta_cadinene	-0.0172414	0.896875
junipene	delta_cadinene	-0.0172414	0.896875
alpha_selinene	delta_cadinene	0.452845	0.000316616
beta_selinene	delta_cadinene	-0.0172414	0.896875
guaiol	delta_cadinene	-0.0172414	0.896875
beta_elemene	delta_cadinene	-0.0302732	0.81995
trans_yophyllene	delta_cadinene	-0.0172414	0.896875
gamma_muurolene	delta_cadinene	-0.0340079	0.798179
alpha_humulene	delta_cadinene	-0.0245946	0.853307
trans_nerolidol	delta_cadinene	-0.0505143	0.703984
beta_copaen_4_alpha_ol	delta_cadinene	-0.0343685	0.796085
beta_gurjunene	delta_cadinene	-0.0172414	0.896875
oxygenate_sesquiterpene	delta_cadinene	-0.0172414	0.896875
Sepidermidis	dihyidro_beta_agarofuran	-0.0140792	0.915713
linalool	dihyidro_beta_agarofuran	-0.0432472	0.745005
camphene	dihyidro_beta_agarofuran	0.833507	2.22045e-16
camphor	dihyidro_beta_agarofuran	-0.0245902	0.853333
alpha_phellandrene	dihyidro_beta_agarofuran	-0.0350781	0.791968
beta_phellandrene	dihyidro_beta_agarofuran	-0.0678948	0.609392
ortho_cymene	dihyidro_beta_agarofuran	-0.0350736	0.791994
alpha_pinene	dihyidro_beta_agarofuran	0.159465	0.227663
beta_pinene	dihyidro_beta_agarofuran	-0.10074	0.447749
sabinene	dihyidro_beta_agarofuran	-0.0350021	0.792408
gamma_cadinene	dihyidro_beta_agarofuran	-0.0350717	0.792005
myrcene	dihyidro_beta_agarofuran	-0.0487978	0.713603
delta_3_carene	dihyidro_beta_agarofuran	-0.040946	0.758149
X1_8_cineole	dihyidro_beta_agarofuran	-0.0245902	0.853333
verbenone	dihyidro_beta_agarofuran	-0.0348769	0.793135
limonene	dihyidro_beta_agarofuran	-0.0700796	0.5979
cis_beta_ocimene	dihyidro_beta_agarofuran	-0.0245902	0.853333
trans_beta_ocimene	dihyidro_beta_agarofuran	-0.0350759	0.79198
germacreneA	dihyidro_beta_agarofuran	-0.0349375	0.792783
germacreneB	dihyidro_beta_agarofuran	-0.0430332	0.746224
germacreneD	dihyidro_beta_agarofuran	-0.128467	0.332203
bicyclogermacrene	dihyidro_beta_agarofuran	-0.115571	0.383398
X1_10_di_epi_cubenol	dihyidro_beta_agarofuran	-0.0245902	0.853333
bulnesol	dihyidro_beta_agarofuran	-0.0245902	0.853333
cis_beta_guaiene	dihyidro_beta_agarofuran	-0.0563838	0.671447
cis_cis_farnesol	dihyidro_beta_agarofuran	-0.0245902	0.853333
trans_cis_farnesol	dihyidro_beta_agarofuran	-0.0245902	0.853333
trans_beta_guaiene	dihyidro_beta_agarofuran	-0.0617158	0.642398
trans_caryophyllene	dihyidro_beta_agarofuran	-0.139584	0.291702
caryophyllene_oxide	dihyidro_beta_agarofuran	-0.0869755	0.512455
spathulenol	dihyidro_beta_agarofuran	-0.124526	0.347372
valencene	dihyidro_beta_agarofuran	-0.0245902	0.853333
ar.curcumene	dihyidro_beta_agarofuran	-0.0245902	0.853333
junipene	dihyidro_beta_agarofuran	-0.0245902	0.853333
alpha_selinene	dihyidro_beta_agarofuran	-0.0334412	0.801473
beta_selinene	dihyidro_beta_agarofuran	-0.0245902	0.853333
guaiol	dihyidro_beta_agarofuran	-0.0245902	0.853333
beta_elemene	dihyidro_beta_agarofuran	-0.0431766	0.745407
trans_yophyllene	dihyidro_beta_agarofuran	-0.0245902	0.853333
gamma_muurolene	dihyidro_beta_agarofuran	-0.0485032	0.715258
alpha_humulene	dihyidro_beta_agarofuran	-0.0350776	0.791971
trans_nerolidol	dihyidro_beta_agarofuran	-0.0720451	0.587644
beta_copaen_4_alpha_ol	dihyidro_beta_agarofuran	-0.0490174	0.712369
beta_gurjunene	dihyidro_beta_agarofuran	-0.0245902	0.853333
oxygenate_sesquiterpene	dihyidro_beta_agarofuran	-0.0245902	0.853333
delta_cadinene	dihyidro_beta_agarofuran	-0.0245902	0.853333
Sepidermidis	X10._epi_gamma_eudesmol	-0.0144912	0.913256
linalool	X10._epi_gamma_eudesmol	-0.0432486	0.744997
camphene	X10._epi_gamma_eudesmol	0.830642	4.44089e-16
camphor	X10._epi_gamma_eudesmol	-0.024591	0.853328
alpha_phellandrene	X10._epi_gamma_eudesmol	-0.0350792	0.791961
beta_phellandrene	X10._epi_gamma_eudesmol	-0.067897	0.60938
ortho_cymene	X10._epi_gamma_eudesmol	-0.0350748	0.791987
alpha_pinene	X10._epi_gamma_eudesmol	0.159321	0.228088
beta_pinene	X10._epi_gamma_eudesmol	-0.100743	0.447734
sabinene	X10._epi_gamma_eudesmol	-0.0350032	0.792402
gamma_cadinene	X10._epi_gamma_eudesmol	-0.0350728	0.791998
myrcene	X10._epi_gamma_eudesmol	-0.0487993	0.713594
delta_3_carene	X10._epi_gamma_eudesmol	-0.0409473	0.758142
X1_8_cineole	X10._epi_gamma_eudesmol	-0.024591	0.853328
verbenone	X10._epi_gamma_eudesmol	-0.034878	0.793128
limonene	X10._epi_gamma_eudesmol	-0.0700818	0.597888
cis_beta_ocimene	X10._epi_gamma_eudesmol	-0.024591	0.853328
trans_beta_ocimene	X10._epi_gamma_eudesmol	-0.035077	0.791974
germacreneA	X10._epi_gamma_eudesmol	-0.0349386	0.792777
germacreneB	X10._epi_gamma_eudesmol	-0.0430346	0.746216
germacreneD	X10._epi_gamma_eudesmol	-0.128471	0.332188
bicyclogermacrene	X10._epi_gamma_eudesmol	-0.115575	0.383383
X1_10_di_epi_cubenol	X10._epi_gamma_eudesmol	-0.024591	0.853328
bulnesol	X10._epi_gamma_eudesmol	-0.024591	0.853328
cis_beta_guaiene	X10._epi_gamma_eudesmol	-0.0563856	0.671437
cis_cis_farnesol	X10._epi_gamma_eudesmol	-0.024591	0.853328
trans_cis_farnesol	X10._epi_gamma_eudesmol	-0.024591	0.853328
trans_beta_guaiene	X10._epi_gamma_eudesmol	-0.0617177	0.642388
trans_caryophyllene	X10._epi_gamma_eudesmol	-0.139588	0.291687
caryophyllene_oxide	X10._epi_gamma_eudesmol	-0.0869783	0.512441
spathulenol	X10._epi_gamma_eudesmol	-0.12453	0.347356
valencene	X10._epi_gamma_eudesmol	-0.024591	0.853328
ar.curcumene	X10._epi_gamma_eudesmol	-0.024591	0.853328
junipene	X10._epi_gamma_eudesmol	-0.024591	0.853328
alpha_selinene	X10._epi_gamma_eudesmol	-0.0334423	0.801467
beta_selinene	X10._epi_gamma_eudesmol	-0.024591	0.853328
guaiol	X10._epi_gamma_eudesmol	-0.024591	0.853328
beta_elemene	X10._epi_gamma_eudesmol	-0.043178	0.745399
trans_yophyllene	X10._epi_gamma_eudesmol	-0.024591	0.853328
gamma_muurolene	X10._epi_gamma_eudesmol	-0.0485047	0.715249
alpha_humulene	X10._epi_gamma_eudesmol	-0.0350787	0.791964
trans_nerolidol	X10._epi_gamma_eudesmol	-0.0720474	0.587632
beta_copaen_4_alpha_ol	X10._epi_gamma_eudesmol	-0.049019	0.71236
beta_gurjunene	X10._epi_gamma_eudesmol	-0.024591	0.853328
oxygenate_sesquiterpene	X10._epi_gamma_eudesmol	-0.024591	0.853328
delta_cadinene	X10._epi_gamma_eudesmol	-0.024591	0.853328
dihyidro_beta_agarofuran	X10._epi_gamma_eudesmol	0.999131	0
Sepidermidis	X4_epi_cis_dihydro_agarofuran	-0.0170599	0.897955
linalool	X4_epi_cis_dihydro_agarofuran	-0.0303227	0.81966
camphene	X4_epi_cis_dihydro_agarofuran	0.533891	1.33292e-05
camphor	X4_epi_cis_dihydro_agarofuran	-0.0172414	0.896875
alpha_phellandrene	X4_epi_cis_dihydro_agarofuran	-0.024595	0.853305
beta_phellandrene	X4_epi_cis_dihydro_agarofuran	-0.0476043	0.720317
ortho_cymene	X4_epi_cis_dihydro_agarofuran	-0.0245918	0.853323
alpha_pinene	X4_epi_cis_dihydro_agarofuran	0.109205	0.410316
beta_pinene	X4_epi_cis_dihydro_agarofuran	-0.0706334	0.595002
sabinene	X4_epi_cis_dihydro_agarofuran	-0.0245417	0.853619
gamma_cadinene	X4_epi_cis_dihydro_agarofuran	-0.0245905	0.853331
myrcene	X4_epi_cis_dihydro_agarofuran	-0.0342145	0.796979
delta_3_carene	X4_epi_cis_dihydro_agarofuran	-0.0287092	0.829108
X1_8_cineole	X4_epi_cis_dihydro_agarofuran	-0.0172414	0.896875
verbenone	X4_epi_cis_dihydro_agarofuran	-0.0244538	0.854137
limonene	X4_epi_cis_dihydro_agarofuran	-0.0491362	0.711703
cis_beta_ocimene	X4_epi_cis_dihydro_agarofuran	-0.0172414	0.896875
trans_beta_ocimene	X4_epi_cis_dihydro_agarofuran	-0.0245934	0.853314
germacreneA	X4_epi_cis_dihydro_agarofuran	-0.0244964	0.853887
germacreneB	X4_epi_cis_dihydro_agarofuran	-0.0301727	0.820538
germacreneD	X4_epi_cis_dihydro_agarofuran	-0.0900743	0.497485
bicyclogermacrene	X4_epi_cis_dihydro_agarofuran	-0.0810327	0.541788
X1_10_di_epi_cubenol	X4_epi_cis_dihydro_agarofuran	-0.0172414	0.896875
bulnesol	X4_epi_cis_dihydro_agarofuran	-0.0172414	0.896875
cis_beta_guaiene	X4_epi_cis_dihydro_agarofuran	-0.0395334	0.766252
cis_cis_farnesol	X4_epi_cis_dihydro_agarofuran	-0.0172414	0.896875
trans_cis_farnesol	X4_epi_cis_dihydro_agarofuran	-0.0172414	0.896875
trans_beta_guaiene	X4_epi_cis_dihydro_agarofuran	-0.0432719	0.744864
trans_caryophyllene	X4_epi_cis_dihydro_agarofuran	-0.0978688	0.460859
caryophyllene_oxide	X4_epi_cis_dihydro_agarofuran	-0.0609827	0.646362
spathulenol	X4_epi_cis_dihydro_agarofuran	-0.087311	0.510823
valencene	X4_epi_cis_dihydro_agarofuran	-0.0172414	0.896875
ar.curcumene	X4_epi_cis_dihydro_agarofuran	-0.0172414	0.896875
junipene	X4_epi_cis_dihydro_agarofuran	-0.0172414	0.896875
alpha_selinene	X4_epi_cis_dihydro_agarofuran	-0.0234473	0.86008
beta_selinene	X4_epi_cis_dihydro_agarofuran	-0.0172414	0.896875
guaiol	X4_epi_cis_dihydro_agarofuran	-0.0172414	0.896875
beta_elemene	X4_epi_cis_dihydro_agarofuran	-0.0302732	0.81995
trans_yophyllene	X4_epi_cis_dihydro_agarofuran	-0.0172414	0.896875
gamma_muurolene	X4_epi_cis_dihydro_agarofuran	-0.0340079	0.798179
alpha_humulene	X4_epi_cis_dihydro_agarofuran	-0.0245946	0.853307
trans_nerolidol	X4_epi_cis_dihydro_agarofuran	-0.0505143	0.703984
beta_copaen_4_alpha_ol	X4_epi_cis_dihydro_agarofuran	-0.0343685	0.796085
beta_gurjunene	X4_epi_cis_dihydro_agarofuran	-0.0172414	0.896875
oxygenate_sesquiterpene	X4_epi_cis_dihydro_agarofuran	-0.0172414	0.896875
delta_cadinene	X4_epi_cis_dihydro_agarofuran	-0.0172414	0.896875
dihyidro_beta_agarofuran	X4_epi_cis_dihydro_agarofuran	0.685404	2.1145e-09
X10._epi_gamma_eudesmol	X4_epi_cis_dihydro_agarofuran	0.715162	1.97086e-10
Sepidermidis	cubenol	0.0674044	0.611984
linalool	cubenol	-0.0303227	0.81966
camphene	cubenol	-0.0302893	0.819855
camphor	cubenol	-0.0172414	0.896875
alpha_phellandrene	cubenol	-0.024595	0.853305
beta_phellandrene	cubenol	-0.0476043	0.720317
ortho_cymene	cubenol	-0.0245918	0.853323
alpha_pinene	cubenol	-0.114217	0.389035
beta_pinene	cubenol	-0.0706334	0.595002
sabinene	cubenol	-0.0245417	0.853619
gamma_cadinene	cubenol	-0.0245905	0.853331
myrcene	cubenol	-0.0342145	0.796979
delta_3_carene	cubenol	-0.0287092	0.829108
X1_8_cineole	cubenol	-0.0172414	0.896875
verbenone	cubenol	-0.0244538	0.854137
limonene	cubenol	-0.0491362	0.711703
cis_beta_ocimene	cubenol	-0.0172414	0.896875
trans_beta_ocimene	cubenol	-0.0245934	0.853314
germacreneA	cubenol	-0.0244964	0.853887
germacreneB	cubenol	-0.0301727	0.820538
germacreneD	cubenol	-0.0900743	0.497485
bicyclogermacrene	cubenol	0.136444	0.302799
X1_10_di_epi_cubenol	cubenol	-0.0172414	0.896875
bulnesol	cubenol	-0.0172414	0.896875
cis_beta_guaiene	cubenol	-0.0395334	0.766252
cis_cis_farnesol	cubenol	-0.0172414	0.896875
trans_cis_farnesol	cubenol	-0.0172414	0.896875
trans_beta_guaiene	cubenol	-0.0432719	0.744864
trans_caryophyllene	cubenol	-0.0978688	0.460859
caryophyllene_oxide	cubenol	-0.0609827	0.646362
spathulenol	cubenol	-0.087311	0.510823
valencene	cubenol	-0.0172414	0.896875
ar.curcumene	cubenol	-0.0172414	0.896875
junipene	cubenol	-0.0172414	0.896875
alpha_selinene	cubenol	-0.0234473	0.86008
beta_selinene	cubenol	-0.0172414	0.896875
guaiol	cubenol	-0.0172414	0.896875
beta_elemene	cubenol	-0.0302732	0.81995
trans_yophyllene	cubenol	-0.0172414	0.896875
gamma_muurolene	cubenol	-0.0340079	0.798179
alpha_humulene	cubenol	-0.0245946	0.853307
trans_nerolidol	cubenol	-0.0505143	0.703984
beta_copaen_4_alpha_ol	cubenol	0.665434	8.94213e-09
beta_gurjunene	cubenol	-0.0172414	0.896875
oxygenate_sesquiterpene	cubenol	-0.0172414	0.896875
delta_cadinene	cubenol	-0.0172414	0.896875
dihyidro_beta_agarofuran	cubenol	-0.0245902	0.853333
X10._epi_gamma_eudesmol	cubenol	-0.024591	0.853328
X4_epi_cis_dihydro_agarofuran	cubenol	-0.0172414	0.896875
Sepidermidis	beta_bourbonene	-0.0029825	0.982114
linalool	beta_bourbonene	-0.0303227	0.81966
camphene	beta_bourbonene	-0.0302893	0.819855
camphor	beta_bourbonene	-0.0172414	0.896875
alpha_phellandrene	beta_bourbonene	-0.024595	0.853305
beta_phellandrene	beta_bourbonene	-0.0476043	0.720317
ortho_cymene	beta_bourbonene	-0.0245918	0.853323
alpha_pinene	beta_bourbonene	-0.114217	0.389035
beta_pinene	beta_bourbonene	-0.0706334	0.595002
sabinene	beta_bourbonene	-0.0245417	0.853619
gamma_cadinene	beta_bourbonene	-0.0245905	0.853331
myrcene	beta_bourbonene	-0.0342145	0.796979
delta_3_carene	beta_bourbonene	-0.0287092	0.829108
X1_8_cineole	beta_bourbonene	-0.0172414	0.896875
verbenone	beta_bourbonene	-0.0244538	0.854137
limonene	beta_bourbonene	-0.0491362	0.711703
cis_beta_ocimene	beta_bourbonene	-0.0172414	0.896875
trans_beta_ocimene	beta_bourbonene	-0.0245934	0.853314
germacreneA	beta_bourbonene	-0.0244964	0.853887
germacreneB	beta_bourbonene	-0.0301727	0.820538
germacreneD	beta_bourbonene	-0.0900743	0.497485
bicyclogermacrene	beta_bourbonene	-0.0810327	0.541788
X1_10_di_epi_cubenol	beta_bourbonene	-0.0172414	0.896875
bulnesol	beta_bourbonene	-0.0172414	0.896875
cis_beta_guaiene	beta_bourbonene	-0.0395334	0.766252
cis_cis_farnesol	beta_bourbonene	-0.0172414	0.896875
trans_cis_farnesol	beta_bourbonene	-0.0172414	0.896875
trans_beta_guaiene	beta_bourbonene	0.551124	6.08634e-06
trans_caryophyllene	beta_bourbonene	-0.0978688	0.460859
caryophyllene_oxide	beta_bourbonene	-0.0609827	0.646362
spathulenol	beta_bourbonene	0.172337	0.191822
valencene	beta_bourbonene	-0.0172414	0.896875
ar.curcumene	beta_bourbonene	-0.0172414	0.896875
junipene	beta_bourbonene	-0.0172414	0.896875
alpha_selinene	beta_bourbonene	-0.0234473	0.86008
beta_selinene	beta_bourbonene	-0.0172414	0.896875
guaiol	beta_bourbonene	-0.0172414	0.896875
beta_elemene	beta_bourbonene	-0.0302732	0.81995
trans_yophyllene	beta_bourbonene	-0.0172414	0.896875
gamma_muurolene	beta_bourbonene	0.692268	1.25444e-09
alpha_humulene	beta_bourbonene	-0.0245946	0.853307
trans_nerolidol	beta_bourbonene	-0.0505143	0.703984
beta_copaen_4_alpha_ol	beta_bourbonene	-0.0343685	0.796085
beta_gurjunene	beta_bourbonene	-0.0172414	0.896875
oxygenate_sesquiterpene	beta_bourbonene	-0.0172414	0.896875
delta_cadinene	beta_bourbonene	-0.0172414	0.896875
dihyidro_beta_agarofuran	beta_bourbonene	-0.0245902	0.853333
X10._epi_gamma_eudesmol	beta_bourbonene	-0.024591	0.853328
X4_epi_cis_dihydro_agarofuran	beta_bourbonene	-0.0172414	0.896875
cubenol	beta_bourbonene	-0.0172414	0.896875
Sepidermidis	beta_bisabolene	-0.059292	0.65554
linalool	beta_bisabolene	-0.0303227	0.81966
camphene	beta_bisabolene	-0.0302893	0.819855
camphor	beta_bisabolene	-0.0172414	0.896875
alpha_phellandrene	beta_bisabolene	-0.024595	0.853305
beta_phellandrene	beta_bisabolene	-0.0476043	0.720317
ortho_cymene	beta_bisabolene	-0.0245918	0.853323
alpha_pinene	beta_bisabolene	-0.114217	0.389035
beta_pinene	beta_bisabolene	-0.0706334	0.595002
sabinene	beta_bisabolene	-0.0245417	0.853619
gamma_cadinene	beta_bisabolene	0.715871	1.85572e-10
myrcene	beta_bisabolene	-0.0342145	0.796979
delta_3_carene	beta_bisabolene	-0.0287092	0.829108
X1_8_cineole	beta_bisabolene	-0.0172414	0.896875
verbenone	beta_bisabolene	-0.0244538	0.854137
limonene	beta_bisabolene	-0.0491362	0.711703
cis_beta_ocimene	beta_bisabolene	-0.0172414	0.896875
trans_beta_ocimene	beta_bisabolene	-0.0245934	0.853314
germacreneA	beta_bisabolene	-0.0244964	0.853887
germacreneB	beta_bisabolene	-0.0301727	0.820538
germacreneD	beta_bisabolene	0.105955	0.424466
bicyclogermacrene	beta_bisabolene	-0.0810327	0.541788
X1_10_di_epi_cubenol	beta_bisabolene	1	0
bulnesol	beta_bisabolene	-0.0172414	0.896875
cis_beta_guaiene	beta_bisabolene	-0.0395334	0.766252
cis_cis_farnesol	beta_bisabolene	-0.0172414	0.896875
trans_cis_farnesol	beta_bisabolene	-0.0172414	0.896875
trans_beta_guaiene	beta_bisabolene	0.42085	0.000903263
trans_caryophyllene	beta_bisabolene	0.115837	0.382298
caryophyllene_oxide	beta_bisabolene	-0.0609827	0.646362
spathulenol	beta_bisabolene	-0.087311	0.510823
valencene	beta_bisabolene	-0.0172414	0.896875
ar.curcumene	beta_bisabolene	-0.0172414	0.896875
junipene	beta_bisabolene	-0.0172414	0.896875
alpha_selinene	beta_bisabolene	-0.0234473	0.86008
beta_selinene	beta_bisabolene	-0.0172414	0.896875
guaiol	beta_bisabolene	-0.0172414	0.896875
beta_elemene	beta_bisabolene	0.512383	3.345e-05
trans_yophyllene	beta_bisabolene	-0.0172414	0.896875
gamma_muurolene	beta_bisabolene	-0.0340079	0.798179
alpha_humulene	beta_bisabolene	-0.0245946	0.853307
trans_nerolidol	beta_bisabolene	-0.0505143	0.703984
beta_copaen_4_alpha_ol	beta_bisabolene	-0.0343685	0.796085
beta_gurjunene	beta_bisabolene	-0.0172414	0.896875
oxygenate_sesquiterpene	beta_bisabolene	-0.0172414	0.896875
delta_cadinene	beta_bisabolene	-0.0172414	0.896875
dihyidro_beta_agarofuran	beta_bisabolene	-0.0245902	0.853333
X10._epi_gamma_eudesmol	beta_bisabolene	-0.024591	0.853328
X4_epi_cis_dihydro_agarofuran	beta_bisabolene	-0.0172414	0.896875
cubenol	beta_bisabolene	-0.0172414	0.896875
beta_bourbonene	beta_bisabolene	-0.0172414	0.896875
Sepidermidis	aromadendrene	-0.0733694	0.580778
linalool	aromadendrene	-0.0303227	0.81966
camphene	aromadendrene	-0.0302893	0.819855
camphor	aromadendrene	-0.0172414	0.896875
alpha_phellandrene	aromadendrene	-0.024595	0.853305
beta_phellandrene	aromadendrene	-0.0476043	0.720317
ortho_cymene	aromadendrene	-0.0245918	0.853323
alpha_pinene	aromadendrene	-0.114217	0.389035
beta_pinene	aromadendrene	-0.0706334	0.595002
sabinene	aromadendrene	-0.0245417	0.853619
gamma_cadinene	aromadendrene	-0.0245905	0.853331
myrcene	aromadendrene	-0.0342145	0.796979
delta_3_carene	aromadendrene	0.343485	0.0077339
X1_8_cineole	aromadendrene	-0.0172414	0.896875
verbenone	aromadendrene	-0.0244538	0.854137
limonene	aromadendrene	-0.0491362	0.711703
cis_beta_ocimene	aromadendrene	-0.0172414	0.896875
trans_beta_ocimene	aromadendrene	-0.0245934	0.853314
germacreneA	aromadendrene	-0.0244964	0.853887
germacreneB	aromadendrene	-0.0301727	0.820538
germacreneD	aromadendrene	0.141692	0.284402
bicyclogermacrene	aromadendrene	0.273598	0.0360136
X1_10_di_epi_cubenol	aromadendrene	-0.0172414	0.896875
bulnesol	aromadendrene	-0.0172414	0.896875
cis_beta_guaiene	aromadendrene	-0.0395334	0.766252
cis_cis_farnesol	aromadendrene	-0.0172414	0.896875
trans_cis_farnesol	aromadendrene	-0.0172414	0.896875
trans_beta_guaiene	aromadendrene	-0.0432719	0.744864
trans_caryophyllene	aromadendrene	0.103972	0.433239
caryophyllene_oxide	aromadendrene	0.164122	0.214194
spathulenol	aromadendrene	0.167984	0.203457
valencene	aromadendrene	-0.0172414	0.896875
ar.curcumene	aromadendrene	-0.0172414	0.896875
junipene	aromadendrene	-0.0172414	0.896875
alpha_selinene	aromadendrene	-0.0234473	0.86008
beta_selinene	aromadendrene	-0.0172414	0.896875
guaiol	aromadendrene	-0.0172414	0.896875
beta_elemene	aromadendrene	-0.0302732	0.81995
trans_yophyllene	aromadendrene	-0.0172414	0.896875
gamma_muurolene	aromadendrene	-0.0340079	0.798179
alpha_humulene	aromadendrene	-0.0245946	0.853307
trans_nerolidol	aromadendrene	-0.0505143	0.703984
beta_copaen_4_alpha_ol	aromadendrene	-0.0343685	0.796085
beta_gurjunene	aromadendrene	-0.0172414	0.896875
oxygenate_sesquiterpene	aromadendrene	-0.0172414	0.896875
delta_cadinene	aromadendrene	-0.0172414	0.896875
dihyidro_beta_agarofuran	aromadendrene	-0.0245902	0.853333
X10._epi_gamma_eudesmol	aromadendrene	-0.024591	0.853328
X4_epi_cis_dihydro_agarofuran	aromadendrene	-0.0172414	0.896875
cubenol	aromadendrene	-0.0172414	0.896875
beta_bourbonene	aromadendrene	-0.0172414	0.896875
beta_bisabolene	aromadendrene	-0.0172414	0.896875
Sepidermidis	elemicine	-0.0733694	0.580778
linalool	elemicine	-0.0303227	0.81966
camphene	elemicine	-0.0302893	0.819855
camphor	elemicine	-0.0172414	0.896875
alpha_phellandrene	elemicine	-0.024595	0.853305
beta_phellandrene	elemicine	-0.0476043	0.720317
ortho_cymene	elemicine	-0.0245918	0.853323
alpha_pinene	elemicine	-0.114217	0.389035
beta_pinene	elemicine	-0.0706334	0.595002
sabinene	elemicine	-0.0245417	0.853619
gamma_cadinene	elemicine	-0.0245905	0.853331
myrcene	elemicine	-0.0342145	0.796979
delta_3_carene	elemicine	-0.0287092	0.829108
X1_8_cineole	elemicine	-0.0172414	0.896875
verbenone	elemicine	-0.0244538	0.854137
limonene	elemicine	-0.0491362	0.711703
cis_beta_ocimene	elemicine	-0.0172414	0.896875
trans_beta_ocimene	elemicine	-0.0245934	0.853314
germacreneA	elemicine	-0.0244964	0.853887
germacreneB	elemicine	-0.0301727	0.820538
germacreneD	elemicine	0.129185	0.329487
bicyclogermacrene	elemicine	-0.0810327	0.541788
X1_10_di_epi_cubenol	elemicine	-0.0172414	0.896875
bulnesol	elemicine	-0.0172414	0.896875
cis_beta_guaiene	elemicine	0.478728	0.000125351
cis_cis_farnesol	elemicine	-0.0172414	0.896875
trans_cis_farnesol	elemicine	-0.0172414	0.896875
trans_beta_guaiene	elemicine	-0.0432719	0.744864
trans_caryophyllene	elemicine	0.106276	0.423055
caryophyllene_oxide	elemicine	0.2011	0.126693
spathulenol	elemicine	0.22503	0.0866102
valencene	elemicine	-0.0172414	0.896875
ar.curcumene	elemicine	-0.0172414	0.896875
junipene	elemicine	-0.0172414	0.896875
alpha_selinene	elemicine	-0.0234473	0.86008
beta_selinene	elemicine	-0.0172414	0.896875
guaiol	elemicine	-0.0172414	0.896875
beta_elemene	elemicine	-0.0302732	0.81995
trans_yophyllene	elemicine	-0.0172414	0.896875
gamma_muurolene	elemicine	-0.0340079	0.798179
alpha_humulene	elemicine	-0.0245946	0.853307
trans_nerolidol	elemicine	-0.0505143	0.703984
beta_copaen_4_alpha_ol	elemicine	-0.0343685	0.796085
beta_gurjunene	elemicine	-0.0172414	0.896875
oxygenate_sesquiterpene	elemicine	-0.0172414	0.896875
delta_cadinene	elemicine	-0.0172414	0.896875
dihyidro_beta_agarofuran	elemicine	-0.0245902	0.853333
X10._epi_gamma_eudesmol	elemicine	-0.024591	0.853328
X4_epi_cis_dihydro_agarofuran	elemicine	-0.0172414	0.896875
cubenol	elemicine	-0.0172414	0.896875
beta_bourbonene	elemicine	-0.0172414	0.896875
beta_bisabolene	elemicine	-0.0172414	0.896875
aromadendrene	elemicine	-0.0172414	0.896875
Sepidermidis	asaricin	-0.0274979	0.836217
linalool	asaricin	-0.0523067	0.693988
camphene	asaricin	-0.0522491	0.694308
camphor	asaricin	-0.0297414	0.823061
alpha_phellandrene	asaricin	-0.0424263	0.749686
beta_phellandrene	asaricin	-0.0821175	0.536373
ortho_cymene	asaricin	-0.0424209	0.749717
alpha_pinene	asaricin	-0.126591	0.33937
beta_pinene	asaricin	-0.121843	0.35794
sabinene	asaricin	-0.0423344	0.75021
gamma_cadinene	asaricin	-0.0424186	0.74973
myrcene	asaricin	-0.05902	0.657022
delta_3_carene	asaricin	-0.0495234	0.709531
X1_8_cineole	asaricin	-0.0297414	0.823061
verbenone	asaricin	-0.0421829	0.751075
limonene	asaricin	-0.0847599	0.523296
cis_beta_ocimene	asaricin	-0.0297414	0.823061
trans_beta_ocimene	asaricin	-0.0424237	0.749701
germacreneA	asaricin	-0.0422562	0.750657
germacreneB	asaricin	-0.0520479	0.695428
germacreneD	asaricin	-0.155378	0.239954
bicyclogermacrene	asaricin	-0.139781	0.291012
X1_10_di_epi_cubenol	asaricin	-0.0297414	0.823061
bulnesol	asaricin	-0.0297414	0.823061
cis_beta_guaiene	asaricin	-0.0681951	0.607806
cis_cis_farnesol	asaricin	-0.0297414	0.823061
trans_cis_farnesol	asaricin	-0.0297414	0.823061
trans_beta_guaiene	asaricin	-0.0746441	0.574205
trans_caryophyllene	asaricin	-0.168824	0.201175
caryophyllene_oxide	asaricin	-0.105195	0.427815
spathulenol	asaricin	-0.036941	0.781187
valencene	asaricin	0.38599	0.00253309
ar.curcumene	asaricin	-0.0297414	0.823061
junipene	asaricin	-0.0297414	0.823061
alpha_selinene	asaricin	-0.0404466	0.761011
beta_selinene	asaricin	-0.0297414	0.823061
guaiol	asaricin	-0.0297414	0.823061
beta_elemene	asaricin	-0.0522213	0.694463
trans_yophyllene	asaricin	-0.0297414	0.823061
gamma_muurolene	asaricin	-0.0586637	0.658964
alpha_humulene	asaricin	-0.0424257	0.749689
trans_nerolidol	asaricin	-0.0871372	0.511668
beta_copaen_4_alpha_ol	asaricin	-0.0592857	0.655575
beta_gurjunene	asaricin	-0.0297414	0.823061
oxygenate_sesquiterpene	asaricin	-0.0297414	0.823061
delta_cadinene	asaricin	-0.0297414	0.823061
dihyidro_beta_agarofuran	asaricin	-0.0424181	0.749733
X10._epi_gamma_eudesmol	asaricin	-0.0424195	0.749725
X4_epi_cis_dihydro_agarofuran	asaricin	-0.0297414	0.823061
cubenol	asaricin	-0.0297414	0.823061
beta_bourbonene	asaricin	-0.0297414	0.823061
beta_bisabolene	asaricin	-0.0297414	0.823061
aromadendrene	asaricin	-0.0297414	0.823061
elemicine	asaricin	-0.0297414	0.823061
Sepidermidis	safrol	-0.0252309	0.849555
linalool	safrol	-0.0534328	0.687735
camphene	safrol	-0.053374	0.688061
camphor	safrol	-0.0303817	0.819315
alpha_phellandrene	safrol	-0.0433397	0.744478
beta_phellandrene	safrol	-0.0838855	0.527606
ortho_cymene	safrol	-0.0433342	0.74451
alpha_pinene	safrol	-0.0965453	0.466973
beta_pinene	safrol	-0.124466	0.347606
sabinene	safrol	-0.0432458	0.745013
gamma_cadinene	safrol	-0.0433318	0.744523
myrcene	safrol	-0.0602907	0.650113
delta_3_carene	safrol	-0.0505896	0.703563
X1_8_cineole	safrol	-0.0303817	0.819315
verbenone	safrol	-0.0430911	0.745895
limonene	safrol	-0.0865847	0.514359
cis_beta_ocimene	safrol	-0.0303817	0.819315
trans_beta_ocimene	safrol	-0.043337	0.744493
germacreneA	safrol	-0.043166	0.745468
germacreneB	safrol	-0.0531684	0.689201
germacreneD	safrol	-0.158723	0.229859
bicyclogermacrene	safrol	-0.142791	0.280646
X1_10_di_epi_cubenol	safrol	-0.0303817	0.819315
bulnesol	safrol	-0.0303817	0.819315
cis_beta_guaiene	safrol	-0.0696633	0.600082
cis_cis_farnesol	safrol	-0.0303817	0.819315
trans_cis_farnesol	safrol	-0.0303817	0.819315
trans_beta_guaiene	safrol	-0.0762511	0.565967
trans_caryophyllene	safrol	-0.172458	0.191503
caryophyllene_oxide	safrol	-0.10746	0.41788
spathulenol	safrol	0.0151526	0.909312
valencene	safrol	0.587732	9.87844e-07
ar.curcumene	safrol	-0.0303817	0.819315
junipene	safrol	-0.0303817	0.819315
alpha_selinene	safrol	-0.0413173	0.756024
beta_selinene	safrol	-0.0303817	0.819315
guaiol	safrol	-0.0303817	0.819315
beta_elemene	safrol	-0.0533456	0.688218
trans_yophyllene	safrol	-0.0303817	0.819315
gamma_muurolene	safrol	-0.0599266	0.652089
alpha_humulene	safrol	-0.043339	0.744482
trans_nerolidol	safrol	-0.0890131	0.502586
beta_copaen_4_alpha_ol	safrol	-0.060562	0.648641
beta_gurjunene	safrol	-0.0303817	0.819315
oxygenate_sesquiterpene	safrol	-0.0303817	0.819315
delta_cadinene	safrol	-0.0303817	0.819315
dihyidro_beta_agarofuran	safrol	-0.0433313	0.744526
X10._epi_gamma_eudesmol	safrol	-0.0433327	0.744518
X4_epi_cis_dihydro_agarofuran	safrol	-0.0303817	0.819315
cubenol	safrol	-0.0303817	0.819315
beta_bourbonene	safrol	-0.0303817	0.819315
beta_bisabolene	safrol	-0.0303817	0.819315
aromadendrene	safrol	-0.0303817	0.819315
elemicine	safrol	-0.0303817	0.819315
asaricin	safrol	0.973201	0
Sepidermidis	methyl_iso_eugenol	0.137791	0.298003
linalool	methyl_iso_eugenol	-0.0303227	0.81966
camphene	methyl_iso_eugenol	-0.0302893	0.819855
camphor	methyl_iso_eugenol	-0.0172414	0.896875
alpha_phellandrene	methyl_iso_eugenol	-0.024595	0.853305
beta_phellandrene	methyl_iso_eugenol	-0.0476043	0.720317
ortho_cymene	methyl_iso_eugenol	-0.0245918	0.853323
alpha_pinene	methyl_iso_eugenol	-0.114217	0.389035
beta_pinene	methyl_iso_eugenol	-0.0706334	0.595002
sabinene	methyl_iso_eugenol	-0.0245417	0.853619
gamma_cadinene	methyl_iso_eugenol	-0.0245905	0.853331
myrcene	methyl_iso_eugenol	-0.0342145	0.796979
delta_3_carene	methyl_iso_eugenol	-0.0287092	0.829108
X1_8_cineole	methyl_iso_eugenol	-0.0172414	0.896875
verbenone	methyl_iso_eugenol	-0.0244538	0.854137
limonene	methyl_iso_eugenol	-0.0491362	0.711703
cis_beta_ocimene	methyl_iso_eugenol	-0.0172414	0.896875
trans_beta_ocimene	methyl_iso_eugenol	-0.0245934	0.853314
germacreneA	methyl_iso_eugenol	-0.0244964	0.853887
germacreneB	methyl_iso_eugenol	-0.0301727	0.820538
germacreneD	methyl_iso_eugenol	-0.0900743	0.497485
bicyclogermacrene	methyl_iso_eugenol	-0.0810327	0.541788
X1_10_di_epi_cubenol	methyl_iso_eugenol	-0.0172414	0.896875
bulnesol	methyl_iso_eugenol	-0.0172414	0.896875
cis_beta_guaiene	methyl_iso_eugenol	-0.0395334	0.766252
cis_cis_farnesol	methyl_iso_eugenol	-0.0172414	0.896875
trans_cis_farnesol	methyl_iso_eugenol	-0.0172414	0.896875
trans_beta_guaiene	methyl_iso_eugenol	-0.0432719	0.744864
trans_caryophyllene	methyl_iso_eugenol	-0.0978688	0.460859
caryophyllene_oxide	methyl_iso_eugenol	-0.0609827	0.646362
spathulenol	methyl_iso_eugenol	-0.087311	0.510823
valencene	methyl_iso_eugenol	-0.0172414	0.896875
ar.curcumene	methyl_iso_eugenol	-0.0172414	0.896875
junipene	methyl_iso_eugenol	-0.0172414	0.896875
alpha_selinene	methyl_iso_eugenol	-0.0234473	0.86008
beta_selinene	methyl_iso_eugenol	-0.0172414	0.896875
guaiol	methyl_iso_eugenol	-0.0172414	0.896875
beta_elemene	methyl_iso_eugenol	-0.0302732	0.81995
trans_yophyllene	methyl_iso_eugenol	-0.0172414	0.896875
gamma_muurolene	methyl_iso_eugenol	-0.0340079	0.798179
alpha_humulene	methyl_iso_eugenol	-0.0245946	0.853307
trans_nerolidol	methyl_iso_eugenol	-0.0505143	0.703984
beta_copaen_4_alpha_ol	methyl_iso_eugenol	-0.0343685	0.796085
beta_gurjunene	methyl_iso_eugenol	-0.0172414	0.896875
oxygenate_sesquiterpene	methyl_iso_eugenol	-0.0172414	0.896875
delta_cadinene	methyl_iso_eugenol	-0.0172414	0.896875
dihyidro_beta_agarofuran	methyl_iso_eugenol	-0.0245902	0.853333
X10._epi_gamma_eudesmol	methyl_iso_eugenol	-0.024591	0.853328
X4_epi_cis_dihydro_agarofuran	methyl_iso_eugenol	-0.0172414	0.896875
cubenol	methyl_iso_eugenol	-0.0172414	0.896875
beta_bourbonene	methyl_iso_eugenol	-0.0172414	0.896875
beta_bisabolene	methyl_iso_eugenol	-0.0172414	0.896875
aromadendrene	methyl_iso_eugenol	-0.0172414	0.896875
elemicine	methyl_iso_eugenol	-0.0172414	0.896875
asaricin	methyl_iso_eugenol	-0.0297414	0.823061
safrol	methyl_iso_eugenol	-0.0303817	0.819315
Sepidermidis	methyl_eugenol	0.0733061	0.581106
linalool	methyl_eugenol	-0.0424655	0.749462
camphene	methyl_eugenol	0.274801	0.035173
camphor	methyl_eugenol	0.552321	5.75428e-06
alpha_phellandrene	methyl_eugenol	-0.034444	0.795646
beta_phellandrene	methyl_eugenol	-0.0666676	0.615889
ortho_cymene	methyl_eugenol	-0.0344397	0.795672
alpha_pinene	methyl_eugenol	-0.159955	0.226217
beta_pinene	methyl_eugenol	-0.0989187	0.45604
sabinene	methyl_eugenol	-0.0343694	0.796079
gamma_cadinene	methyl_eugenol	-0.0344378	0.795683
myrcene	methyl_eugenol	-0.0479157	0.718563
delta_3_carene	methyl_eugenol	-0.0402059	0.762392
X1_8_cineole	methyl_eugenol	-0.0241457	0.855956
verbenone	methyl_eugenol	-0.0342464	0.796794
limonene	methyl_eugenol	0.0786602	0.553722
cis_beta_ocimene	methyl_eugenol	-0.0241457	0.855956
trans_beta_ocimene	methyl_eugenol	-0.0344419	0.795659
germacreneA	methyl_eugenol	-0.034306	0.796448
germacreneB	methyl_eugenol	-0.0422554	0.750662
germacreneD	methyl_eugenol	-0.126145	0.341089
bicyclogermacrene	methyl_eugenol	-0.113482	0.392112
X1_10_di_epi_cubenol	methyl_eugenol	-0.0241457	0.855956
bulnesol	methyl_eugenol	-0.0241457	0.855956
cis_beta_guaiene	methyl_eugenol	-0.0553646	0.677056
cis_cis_farnesol	methyl_eugenol	-0.0241457	0.855956
trans_cis_farnesol	methyl_eugenol	-0.0241457	0.855956
trans_beta_guaiene	methyl_eugenol	-0.0606002	0.648434
trans_caryophyllene	methyl_eugenol	-0.137061	0.300598
caryophyllene_oxide	methyl_eugenol	-0.0854034	0.520135
spathulenol	methyl_eugenol	-0.122275	0.356224
valencene	methyl_eugenol	-0.0241457	0.855956
ar.curcumene	methyl_eugenol	-0.0241457	0.855956
junipene	methyl_eugenol	-0.0241457	0.855956
alpha_selinene	methyl_eugenol	-0.0328368	0.80499
beta_selinene	methyl_eugenol	-0.0241457	0.855956
guaiol	methyl_eugenol	-0.0241457	0.855956
beta_elemene	methyl_eugenol	-0.0423962	0.749858
trans_yophyllene	methyl_eugenol	-0.0241457	0.855956
gamma_muurolene	methyl_eugenol	-0.0476264	0.720192
alpha_humulene	methyl_eugenol	-0.0344435	0.795649
trans_nerolidol	methyl_eugenol	-0.0707428	0.59443
beta_copaen_4_alpha_ol	methyl_eugenol	-0.0481314	0.717349
beta_gurjunene	methyl_eugenol	-0.0241457	0.855956
oxygenate_sesquiterpene	methyl_eugenol	-0.0241457	0.855956
delta_cadinene	methyl_eugenol	-0.0241457	0.855956
dihyidro_beta_agarofuran	methyl_eugenol	-0.0344374	0.795685
X10._epi_gamma_eudesmol	methyl_eugenol	-0.0344385	0.795678
X4_epi_cis_dihydro_agarofuran	methyl_eugenol	-0.0241457	0.855956
cubenol	methyl_eugenol	-0.0241457	0.855956
beta_bourbonene	methyl_eugenol	-0.0241457	0.855956
beta_bisabolene	methyl_eugenol	-0.0241457	0.855956
aromadendrene	methyl_eugenol	-0.0241457	0.855956
elemicine	methyl_eugenol	-0.0241457	0.855956
asaricin	methyl_eugenol	-0.0416514	0.754113
safrol	methyl_eugenol	-0.0425481	0.748991
methyl_iso_eugenol	methyl_eugenol	0.823985	1.11022e-15
Sepidermidis	benzyl_salicylate	-0.0733694	0.580778
linalool	benzyl_salicylate	-0.0303227	0.81966
camphene	benzyl_salicylate	-0.0302893	0.819855
camphor	benzyl_salicylate	-0.0172414	0.896875
alpha_phellandrene	benzyl_salicylate	-0.024595	0.853305
beta_phellandrene	benzyl_salicylate	-0.0476043	0.720317
ortho_cymene	benzyl_salicylate	-0.0245918	0.853323
alpha_pinene	benzyl_salicylate	0.0977038	0.461619
beta_pinene	benzyl_salicylate	0.149812	0.257419
sabinene	benzyl_salicylate	-0.0245417	0.853619
gamma_cadinene	benzyl_salicylate	-0.0245905	0.853331
myrcene	benzyl_salicylate	-0.0342145	0.796979
delta_3_carene	benzyl_salicylate	-0.0287092	0.829108
X1_8_cineole	benzyl_salicylate	-0.0172414	0.896875
verbenone	benzyl_salicylate	-0.0244538	0.854137
limonene	benzyl_salicylate	-0.0491362	0.711703
cis_beta_ocimene	benzyl_salicylate	-0.0172414	0.896875
trans_beta_ocimene	benzyl_salicylate	-0.0245934	0.853314
germacreneA	benzyl_salicylate	-0.0244964	0.853887
germacreneB	benzyl_salicylate	-0.0301727	0.820538
germacreneD	benzyl_salicylate	-0.0900743	0.497485
bicyclogermacrene	benzyl_salicylate	-0.0810327	0.541788
X1_10_di_epi_cubenol	benzyl_salicylate	-0.0172414	0.896875
bulnesol	benzyl_salicylate	-0.0172414	0.896875
cis_beta_guaiene	benzyl_salicylate	-0.0395334	0.766252
cis_cis_farnesol	benzyl_salicylate	-0.0172414	0.896875
trans_cis_farnesol	benzyl_salicylate	-0.0172414	0.896875
trans_beta_guaiene	benzyl_salicylate	-0.0432719	0.744864
trans_caryophyllene	benzyl_salicylate	-0.0978688	0.460859
caryophyllene_oxide	benzyl_salicylate	-0.0609827	0.646362
spathulenol	benzyl_salicylate	0.145662	0.270987
valencene	benzyl_salicylate	-0.0172414	0.896875
ar.curcumene	benzyl_salicylate	-0.0172414	0.896875
junipene	benzyl_salicylate	-0.0172414	0.896875
alpha_selinene	benzyl_salicylate	-0.0234473	0.86008
beta_selinene	benzyl_salicylate	-0.0172414	0.896875
guaiol	benzyl_salicylate	-0.0172414	0.896875
beta_elemene	benzyl_salicylate	-0.0302732	0.81995
trans_yophyllene	benzyl_salicylate	-0.0172414	0.896875
gamma_muurolene	benzyl_salicylate	-0.0340079	0.798179
alpha_humulene	benzyl_salicylate	-0.0245946	0.853307
trans_nerolidol	benzyl_salicylate	-0.0505143	0.703984
beta_copaen_4_alpha_ol	benzyl_salicylate	-0.0343685	0.796085
beta_gurjunene	benzyl_salicylate	-0.0172414	0.896875
oxygenate_sesquiterpene	benzyl_salicylate	-0.0172414	0.896875
delta_cadinene	benzyl_salicylate	-0.0172414	0.896875
dihyidro_beta_agarofuran	benzyl_salicylate	-0.0245902	0.853333
X10._epi_gamma_eudesmol	benzyl_salicylate	-0.024591	0.853328
X4_epi_cis_dihydro_agarofuran	benzyl_salicylate	-0.0172414	0.896875
cubenol	benzyl_salicylate	-0.0172414	0.896875
beta_bourbonene	benzyl_salicylate	-0.0172414	0.896875
beta_bisabolene	benzyl_salicylate	-0.0172414	0.896875
aromadendrene	benzyl_salicylate	-0.0172414	0.896875
elemicine	benzyl_salicylate	-0.0172414	0.896875
asaricin	benzyl_salicylate	-0.0297414	0.823061
safrol	benzyl_salicylate	-0.0303817	0.819315
methyl_iso_eugenol	benzyl_salicylate	-0.0172414	0.896875
methyl_eugenol	benzyl_salicylate	-0.0241457	0.855956
Sepidermidis	benzyl_benzoate	-0.0733694	0.580778
linalool	benzyl_benzoate	-0.0303227	0.81966
camphene	benzyl_benzoate	-0.0302893	0.819855
camphor	benzyl_benzoate	-0.0172414	0.896875
alpha_phellandrene	benzyl_benzoate	-0.024595	0.853305
beta_phellandrene	benzyl_benzoate	-0.0476043	0.720317
ortho_cymene	benzyl_benzoate	-0.0245918	0.853323
alpha_pinene	benzyl_benzoate	0.0977038	0.461619
beta_pinene	benzyl_benzoate	0.149812	0.257419
sabinene	benzyl_benzoate	-0.0245417	0.853619
gamma_cadinene	benzyl_benzoate	-0.0245905	0.853331
myrcene	benzyl_benzoate	-0.0342145	0.796979
delta_3_carene	benzyl_benzoate	-0.0287092	0.829108
X1_8_cineole	benzyl_benzoate	-0.0172414	0.896875
verbenone	benzyl_benzoate	-0.0244538	0.854137
limonene	benzyl_benzoate	-0.0491362	0.711703
cis_beta_ocimene	benzyl_benzoate	-0.0172414	0.896875
trans_beta_ocimene	benzyl_benzoate	-0.0245934	0.853314
germacreneA	benzyl_benzoate	-0.0244964	0.853887
germacreneB	benzyl_benzoate	-0.0301727	0.820538
germacreneD	benzyl_benzoate	-0.0900743	0.497485
bicyclogermacrene	benzyl_benzoate	-0.0810327	0.541788
X1_10_di_epi_cubenol	benzyl_benzoate	-0.0172414	0.896875
bulnesol	benzyl_benzoate	-0.0172414	0.896875
cis_beta_guaiene	benzyl_benzoate	-0.0395334	0.766252
cis_cis_farnesol	benzyl_benzoate	-0.0172414	0.896875
trans_cis_farnesol	benzyl_benzoate	-0.0172414	0.896875
trans_beta_guaiene	benzyl_benzoate	-0.0432719	0.744864
trans_caryophyllene	benzyl_benzoate	-0.0978688	0.460859
caryophyllene_oxide	benzyl_benzoate	-0.0609827	0.646362
spathulenol	benzyl_benzoate	0.145662	0.270987
valencene	benzyl_benzoate	-0.0172414	0.896875
ar.curcumene	benzyl_benzoate	-0.0172414	0.896875
junipene	benzyl_benzoate	-0.0172414	0.896875
alpha_selinene	benzyl_benzoate	-0.0234473	0.86008
beta_selinene	benzyl_benzoate	-0.0172414	0.896875
guaiol	benzyl_benzoate	-0.0172414	0.896875
beta_elemene	benzyl_benzoate	-0.0302732	0.81995
trans_yophyllene	benzyl_benzoate	-0.0172414	0.896875
gamma_muurolene	benzyl_benzoate	-0.0340079	0.798179
alpha_humulene	benzyl_benzoate	-0.0245946	0.853307
trans_nerolidol	benzyl_benzoate	-0.0505143	0.703984
beta_copaen_4_alpha_ol	benzyl_benzoate	-0.0343685	0.796085
beta_gurjunene	benzyl_benzoate	-0.0172414	0.896875
oxygenate_sesquiterpene	benzyl_benzoate	-0.0172414	0.896875
delta_cadinene	benzyl_benzoate	-0.0172414	0.896875
dihyidro_beta_agarofuran	benzyl_benzoate	-0.0245902	0.853333
X10._epi_gamma_eudesmol	benzyl_benzoate	-0.024591	0.853328
X4_epi_cis_dihydro_agarofuran	benzyl_benzoate	-0.0172414	0.896875
cubenol	benzyl_benzoate	-0.0172414	0.896875
beta_bourbonene	benzyl_benzoate	-0.0172414	0.896875
beta_bisabolene	benzyl_benzoate	-0.0172414	0.896875
aromadendrene	benzyl_benzoate	-0.0172414	0.896875
elemicine	benzyl_benzoate	-0.0172414	0.896875
asaricin	benzyl_benzoate	-0.0297414	0.823061
safrol	benzyl_benzoate	-0.0303817	0.819315
methyl_iso_eugenol	benzyl_benzoate	-0.0172414	0.896875
methyl_eugenol	benzyl_benzoate	-0.0241457	0.855956
benzyl_salicylate	benzyl_benzoate	1	0
Sepidermidis	X2_tridecanone	0.348952	0.00675427
linalool	X2_tridecanone	-0.0303227	0.81966
camphene	X2_tridecanone	-0.0302893	0.819855
camphor	X2_tridecanone	-0.0172414	0.896875
alpha_phellandrene	X2_tridecanone	-0.024595	0.853305
beta_phellandrene	X2_tridecanone	0.399779	0.00170691
ortho_cymene	X2_tridecanone	-0.0245918	0.853323
alpha_pinene	X2_tridecanone	0.149572	0.258191
beta_pinene	X2_tridecanone	-0.0706334	0.595002
sabinene	X2_tridecanone	-0.0245417	0.853619
gamma_cadinene	X2_tridecanone	-0.0245905	0.853331
myrcene	X2_tridecanone	-0.0342145	0.796979
delta_3_carene	X2_tridecanone	-0.0287092	0.829108
X1_8_cineole	X2_tridecanone	-0.0172414	0.896875
verbenone	X2_tridecanone	-0.0244538	0.854137
limonene	X2_tridecanone	-0.0491362	0.711703
cis_beta_ocimene	X2_tridecanone	-0.0172414	0.896875
trans_beta_ocimene	X2_tridecanone	-0.0245934	0.853314
germacreneA	X2_tridecanone	-0.0244964	0.853887
germacreneB	X2_tridecanone	-0.0301727	0.820538
germacreneD	X2_tridecanone	-0.0900743	0.497485
bicyclogermacrene	X2_tridecanone	-0.0810327	0.541788
X1_10_di_epi_cubenol	X2_tridecanone	-0.0172414	0.896875
bulnesol	X2_tridecanone	-0.0172414	0.896875
cis_beta_guaiene	X2_tridecanone	-0.0395334	0.766252
cis_cis_farnesol	X2_tridecanone	-0.0172414	0.896875
trans_cis_farnesol	X2_tridecanone	-0.0172414	0.896875
trans_beta_guaiene	X2_tridecanone	-0.0432719	0.744864
trans_caryophyllene	X2_tridecanone	-0.0978688	0.460859
caryophyllene_oxide	X2_tridecanone	-0.0609827	0.646362
spathulenol	X2_tridecanone	-0.087311	0.510823
valencene	X2_tridecanone	-0.0172414	0.896875
ar.curcumene	X2_tridecanone	-0.0172414	0.896875
junipene	X2_tridecanone	-0.0172414	0.896875
alpha_selinene	X2_tridecanone	-0.0234473	0.86008
beta_selinene	X2_tridecanone	-0.0172414	0.896875
guaiol	X2_tridecanone	-0.0172414	0.896875
beta_elemene	X2_tridecanone	-0.0302732	0.81995
trans_yophyllene	X2_tridecanone	-0.0172414	0.896875
gamma_muurolene	X2_tridecanone	-0.0340079	0.798179
alpha_humulene	X2_tridecanone	-0.0245946	0.853307
trans_nerolidol	X2_tridecanone	-0.0505143	0.703984
beta_copaen_4_alpha_ol	X2_tridecanone	-0.0343685	0.796085
beta_gurjunene	X2_tridecanone	-0.0172414	0.896875
oxygenate_sesquiterpene	X2_tridecanone	-0.0172414	0.896875
delta_cadinene	X2_tridecanone	-0.0172414	0.896875
dihyidro_beta_agarofuran	X2_tridecanone	-0.0245902	0.853333
X10._epi_gamma_eudesmol	X2_tridecanone	-0.024591	0.853328
X4_epi_cis_dihydro_agarofuran	X2_tridecanone	-0.0172414	0.896875
cubenol	X2_tridecanone	-0.0172414	0.896875
beta_bourbonene	X2_tridecanone	-0.0172414	0.896875
beta_bisabolene	X2_tridecanone	-0.0172414	0.896875
aromadendrene	X2_tridecanone	-0.0172414	0.896875
elemicine	X2_tridecanone	-0.0172414	0.896875
asaricin	X2_tridecanone	-0.0297414	0.823061
safrol	X2_tridecanone	-0.0303817	0.819315
methyl_iso_eugenol	X2_tridecanone	-0.0172414	0.896875
methyl_eugenol	X2_tridecanone	-0.0241457	0.855956
benzyl_salicylate	X2_tridecanone	-0.0172414	0.896875
benzyl_benzoate	X2_tridecanone	-0.0172414	0.896875
Sepidermidis	X2_undecanone	0.348952	0.00675427
linalool	X2_undecanone	-0.0303227	0.81966
camphene	X2_undecanone	-0.0302893	0.819855
camphor	X2_undecanone	-0.0172414	0.896875
alpha_phellandrene	X2_undecanone	-0.024595	0.853305
beta_phellandrene	X2_undecanone	0.399779	0.00170691
ortho_cymene	X2_undecanone	-0.0245918	0.853323
alpha_pinene	X2_undecanone	0.149572	0.258191
beta_pinene	X2_undecanone	-0.0706334	0.595002
sabinene	X2_undecanone	-0.0245417	0.853619
gamma_cadinene	X2_undecanone	-0.0245905	0.853331
myrcene	X2_undecanone	-0.0342145	0.796979
delta_3_carene	X2_undecanone	-0.0287092	0.829108
X1_8_cineole	X2_undecanone	-0.0172414	0.896875
verbenone	X2_undecanone	-0.0244538	0.854137
limonene	X2_undecanone	-0.0491362	0.711703
cis_beta_ocimene	X2_undecanone	-0.0172414	0.896875
trans_beta_ocimene	X2_undecanone	-0.0245934	0.853314
germacreneA	X2_undecanone	-0.0244964	0.853887
germacreneB	X2_undecanone	-0.0301727	0.820538
germacreneD	X2_undecanone	-0.0900743	0.497485
bicyclogermacrene	X2_undecanone	-0.0810327	0.541788
X1_10_di_epi_cubenol	X2_undecanone	-0.0172414	0.896875
bulnesol	X2_undecanone	-0.0172414	0.896875
cis_beta_guaiene	X2_undecanone	-0.0395334	0.766252
cis_cis_farnesol	X2_undecanone	-0.0172414	0.896875
trans_cis_farnesol	X2_undecanone	-0.0172414	0.896875
trans_beta_guaiene	X2_undecanone	-0.0432719	0.744864
trans_caryophyllene	X2_undecanone	-0.0978688	0.460859
caryophyllene_oxide	X2_undecanone	-0.0609827	0.646362
spathulenol	X2_undecanone	-0.087311	0.510823
valencene	X2_undecanone	-0.0172414	0.896875
ar.curcumene	X2_undecanone	-0.0172414	0.896875
junipene	X2_undecanone	-0.0172414	0.896875
alpha_selinene	X2_undecanone	-0.0234473	0.86008
beta_selinene	X2_undecanone	-0.0172414	0.896875
guaiol	X2_undecanone	-0.0172414	0.896875
beta_elemene	X2_undecanone	-0.0302732	0.81995
trans_yophyllene	X2_undecanone	-0.0172414	0.896875
gamma_muurolene	X2_undecanone	-0.0340079	0.798179
alpha_humulene	X2_undecanone	-0.0245946	0.853307
trans_nerolidol	X2_undecanone	-0.0505143	0.703984
beta_copaen_4_alpha_ol	X2_undecanone	-0.0343685	0.796085
beta_gurjunene	X2_undecanone	-0.0172414	0.896875
oxygenate_sesquiterpene	X2_undecanone	-0.0172414	0.896875
delta_cadinene	X2_undecanone	-0.0172414	0.896875
dihyidro_beta_agarofuran	X2_undecanone	-0.0245902	0.853333
X10._epi_gamma_eudesmol	X2_undecanone	-0.024591	0.853328
X4_epi_cis_dihydro_agarofuran	X2_undecanone	-0.0172414	0.896875
cubenol	X2_undecanone	-0.0172414	0.896875
beta_bourbonene	X2_undecanone	-0.0172414	0.896875
beta_bisabolene	X2_undecanone	-0.0172414	0.896875
aromadendrene	X2_undecanone	-0.0172414	0.896875
elemicine	X2_undecanone	-0.0172414	0.896875
asaricin	X2_undecanone	-0.0297414	0.823061
safrol	X2_undecanone	-0.0303817	0.819315
methyl_iso_eugenol	X2_undecanone	-0.0172414	0.896875
methyl_eugenol	X2_undecanone	-0.0241457	0.855956
benzyl_salicylate	X2_undecanone	-0.0172414	0.896875
benzyl_benzoate	X2_undecanone	-0.0172414	0.896875
X2_tridecanone	X2_undecanone	1	0

## Sheet: S aureus
		Pearson´s r	p-value
Saureus	linalool	-0.0372596	0.779347
Saureus	camphene	-0.137054	0.300623
linalool	camphene	-0.0532704	0.688635
Saureus	camphor	-0.138209	0.296528
linalool	camphor	-0.0303227	0.81966
camphene	camphor	0.529481	1.61799e-05
Saureus	alpha_phellandrene	-0.0698083	0.599321
linalool	alpha_phellandrene	-0.0432556	0.744957
camphene	alpha_phellandrene	-0.043208	0.745228
camphor	alpha_phellandrene	-0.024595	0.853305
Saureus	beta_phellandrene	-0.00775386	0.953522
linalool	beta_phellandrene	-0.0837226	0.528411
camphene	beta_phellandrene	-0.0836304	0.528866
camphor	beta_phellandrene	-0.0476043	0.720317
alpha_phellandrene	beta_phellandrene	0.18018	0.172071
Saureus	ortho_cymene	-0.153536	0.245642
linalool	ortho_cymene	-0.04325	0.744989
camphene	ortho_cymene	-0.0432025	0.74526
camphor	ortho_cymene	-0.0245918	0.853323
alpha_phellandrene	ortho_cymene	0.477534	0.000131044
beta_phellandrene	ortho_cymene	-0.0678993	0.609368
Saureus	alpha_pinene	0.167305	0.205316
linalool	alpha_pinene	-0.0581618	0.661705
camphene	alpha_pinene	0.0722277	0.586695
camphor	alpha_pinene	-0.114217	0.389035
alpha_phellandrene	alpha_pinene	0.0270335	0.838945
beta_phellandrene	alpha_pinene	0.162032	0.220168
ortho_cymene	alpha_pinene	-0.16291	0.217643
Saureus	beta_pinene	0.0943493	0.477213
linalool	beta_pinene	-0.124224	0.34855
camphene	beta_pinene	-0.124087	0.349085
camphor	beta_pinene	-0.0706334	0.595002
alpha_phellandrene	beta_pinene	-0.100759	0.447661
beta_phellandrene	beta_pinene	-0.195023	0.13882
ortho_cymene	beta_pinene	-0.100746	0.447719
alpha_pinene	beta_pinene	0.355972	0.00565683
Saureus	sabinene	0.0141545	0.915264
linalool	sabinene	-0.0431619	0.745491
camphene	sabinene	-0.0431144	0.745762
camphor	sabinene	-0.0245417	0.853619
alpha_phellandrene	sabinene	-0.0350089	0.792369
beta_phellandrene	sabinene	0.39734	0.00183259
ortho_cymene	sabinene	-0.0350044	0.792395
alpha_pinene	sabinene	-0.0455884	0.731706
beta_pinene	sabinene	-0.100541	0.44865
Saureus	gamma_cadinene	-0.0677701	0.610051
linalool	gamma_cadinene	-0.0432477	0.745002
camphene	gamma_cadinene	-0.0432001	0.745273
camphor	gamma_cadinene	-0.0245905	0.853331
alpha_phellandrene	gamma_cadinene	-0.0350785	0.791965
beta_phellandrene	gamma_cadinene	-0.0678956	0.609388
ortho_cymene	gamma_cadinene	0.480667	0.000116596
alpha_pinene	gamma_cadinene	-0.162901	0.217668
beta_pinene	gamma_cadinene	-0.100741	0.447744
sabinene	gamma_cadinene	-0.0350025	0.792406
Saureus	myrcene	-0.146078	0.269604
linalool	myrcene	-0.0601736	0.650748
camphene	myrcene	-0.0601074	0.651107
camphor	myrcene	-0.0342145	0.796979
alpha_phellandrene	myrcene	-0.0488072	0.71355
beta_phellandrene	myrcene	0.243042	0.0636228
ortho_cymene	myrcene	0.248243	0.0579883
alpha_pinene	myrcene	-0.0194997	0.883456
beta_pinene	myrcene	-0.140168	0.289668
sabinene	myrcene	0.277053	0.0336424
gamma_cadinene	myrcene	0.236923	0.0708056
Saureus	delta_3_carene	-0.167869	0.203771
linalool	delta_3_carene	-0.0504914	0.704112
camphene	delta_3_carene	-0.0504358	0.704422
camphor	delta_3_carene	-0.0287092	0.829108
alpha_phellandrene	delta_3_carene	-0.0409539	0.758104
beta_phellandrene	delta_3_carene	-0.0792676	0.550655
ortho_cymene	delta_3_carene	-0.0409487	0.758134
alpha_pinene	delta_3_carene	0.0445106	0.737819
beta_pinene	delta_3_carene	-0.117614	0.374989
sabinene	delta_3_carene	-0.0408652	0.758612
gamma_cadinene	delta_3_carene	-0.0409465	0.758147
myrcene	delta_3_carene	0.533726	1.34273e-05
Saureus	X1_8_cineole	0.132	0.318963
linalool	X1_8_cineole	-0.0303227	0.81966
camphene	X1_8_cineole	-0.0302893	0.819855
camphor	X1_8_cineole	-0.0172414	0.896875
alpha_phellandrene	X1_8_cineole	-0.024595	0.853305
beta_phellandrene	X1_8_cineole	-0.0476043	0.720317
ortho_cymene	X1_8_cineole	-0.0245918	0.853323
alpha_pinene	X1_8_cineole	-0.114217	0.389035
beta_pinene	X1_8_cineole	-0.0706334	0.595002
sabinene	X1_8_cineole	-0.0245417	0.853619
gamma_cadinene	X1_8_cineole	-0.0245905	0.853331
myrcene	X1_8_cineole	-0.0342145	0.796979
delta_3_carene	X1_8_cineole	-0.0287092	0.829108
Saureus	verbenone	0.0539955	0.684618
linalool	verbenone	-0.0430074	0.746371
camphene	verbenone	-0.0429601	0.746641
camphor	verbenone	-0.0244538	0.854137
alpha_phellandrene	verbenone	-0.0348836	0.793096
beta_phellandrene	verbenone	-0.0675183	0.611382
ortho_cymene	verbenone	0.43328	0.000608445
alpha_pinene	verbenone	-0.161996	0.22027
beta_pinene	verbenone	-0.100181	0.450283
sabinene	verbenone	-0.034808	0.793534
gamma_cadinene	verbenone	0.415436	0.00106793
myrcene	verbenone	0.210834	0.108964
delta_3_carene	verbenone	-0.0407189	0.75945
X1_8_cineole	verbenone	0.773486	6.92779e-13
Saureus	limonene	0.05757	0.664941
linalool	limonene	0.0387908	0.770522
camphene	limonene	0.0568801	0.668721
camphor	limonene	0.211097	0.108512
alpha_phellandrene	limonene	-0.0700931	0.597829
beta_phellandrene	limonene	-0.135668	0.305584
ortho_cymene	limonene	-0.0700842	0.597876
alpha_pinene	limonene	0.0718463	0.588677
beta_pinene	limonene	0.084744	0.523374
sabinene	limonene	-0.0699413	0.598624
gamma_cadinene	limonene	-0.0700803	0.597896
myrcene	limonene	-0.0975078	0.462522
delta_3_carene	limonene	-0.0818183	0.537864
X1_8_cineole	limonene	-0.0491362	0.711703
verbenone	limonene	-0.069691	0.599937
Saureus	cis_beta_ocimene	0.0839633	0.527222
linalool	cis_beta_ocimene	-0.0303227	0.81966
camphene	cis_beta_ocimene	-0.0302893	0.819855
camphor	cis_beta_ocimene	-0.0172414	0.896875
alpha_phellandrene	cis_beta_ocimene	-0.024595	0.853305
beta_phellandrene	cis_beta_ocimene	-0.0476043	0.720317
ortho_cymene	cis_beta_ocimene	-0.0245918	0.853323
alpha_pinene	cis_beta_ocimene	0.154651	0.242189
beta_pinene	cis_beta_ocimene	-0.0706334	0.595002
sabinene	cis_beta_ocimene	-0.0245417	0.853619
gamma_cadinene	cis_beta_ocimene	-0.0245905	0.853331
myrcene	cis_beta_ocimene	-0.0342145	0.796979
delta_3_carene	cis_beta_ocimene	-0.0287092	0.829108
X1_8_cineole	cis_beta_ocimene	-0.0172414	0.896875
verbenone	cis_beta_ocimene	-0.0244538	0.854137
limonene	cis_beta_ocimene	0.218522	0.0963633
Saureus	trans_beta_ocimene	0.0610157	0.646183
linalool	trans_beta_ocimene	-0.0432529	0.744973
camphene	trans_beta_ocimene	-0.0432053	0.745244
camphor	trans_beta_ocimene	-0.0245934	0.853314
alpha_phellandrene	trans_beta_ocimene	-0.0350827	0.791941
beta_phellandrene	trans_beta_ocimene	-0.0679037	0.609345
ortho_cymene	trans_beta_ocimene	-0.0350782	0.791967
alpha_pinene	trans_beta_ocimene	-0.162921	0.217612
beta_pinene	trans_beta_ocimene	-0.100753	0.447689
sabinene	trans_beta_ocimene	-0.0350067	0.792382
gamma_cadinene	trans_beta_ocimene	-0.0350763	0.791978
myrcene	trans_beta_ocimene	-0.0488042	0.713567
delta_3_carene	trans_beta_ocimene	-0.0409514	0.758119
X1_8_cineole	trans_beta_ocimene	-0.0245934	0.853314
verbenone	trans_beta_ocimene	-0.0348814	0.793108
limonene	trans_beta_ocimene	0.25719	0.049245
cis_beta_ocimene	trans_beta_ocimene	-0.0245934	0.853314
Saureus	germacreneA	-0.113977	0.390038
linalool	germacreneA	0.375306	0.00340068
camphene	germacreneA	-0.0430347	0.746216
camphor	germacreneA	-0.0244964	0.853887
alpha_phellandrene	germacreneA	-0.0349442	0.792744
beta_phellandrene	germacreneA	-0.0676357	0.610761
ortho_cymene	germacreneA	-0.0349398	0.79277
alpha_pinene	germacreneA	-0.162278	0.219459
beta_pinene	germacreneA	0.111757	0.399398
sabinene	germacreneA	-0.0348685	0.793183
gamma_cadinene	germacreneA	-0.0349379	0.792781
myrcene	germacreneA	-0.0486115	0.714649
delta_3_carene	germacreneA	-0.0407897	0.759045
X1_8_cineole	germacreneA	-0.0244964	0.853887
verbenone	germacreneA	-0.0347437	0.793907
limonene	germacreneA	-0.0698121	0.599302
cis_beta_ocimene	germacreneA	-0.0244964	0.853887
trans_beta_ocimene	germacreneA	-0.0349421	0.792757
Saureus	germacreneB	0.120971	0.361414
linalool	germacreneB	-0.0530652	0.689774
camphene	germacreneB	-0.0530068	0.690098
camphor	germacreneB	-0.0301727	0.820538
alpha_phellandrene	germacreneB	0.308801	0.017328
beta_phellandrene	germacreneB	0.0883904	0.505591
ortho_cymene	germacreneB	-0.0430361	0.746208
alpha_pinene	germacreneB	0.0523821	0.693569
beta_pinene	germacreneB	0.0504409	0.704394
sabinene	germacreneB	-0.0429483	0.746708
gamma_cadinene	germacreneB	-0.0430337	0.746221
myrcene	germacreneB	-0.0598759	0.652365
delta_3_carene	germacreneB	-0.0502416	0.705509
X1_8_cineole	germacreneB	-0.0301727	0.820538
verbenone	germacreneB	-0.0427946	0.747584
limonene	germacreneB	-0.085989	0.517267
cis_beta_ocimene	germacreneB	-0.0301727	0.820538
trans_beta_ocimene	germacreneB	-0.0430389	0.746192
germacreneA	germacreneB	-0.042869	0.74716
Saureus	germacreneD	-0.0303752	0.819353
linalool	germacreneD	-0.158415	0.230777
camphene	germacreneD	-0.158241	0.231297
camphor	germacreneD	-0.0900743	0.497485
alpha_phellandrene	germacreneD	0.0282071	0.832053
beta_phellandrene	germacreneD	0.0903264	0.496278
ortho_cymene	germacreneD	0.0354723	0.789683
alpha_pinene	germacreneD	-0.240246	0.0668281
beta_pinene	germacreneD	-0.0945542	0.476252
sabinene	germacreneD	-0.128213	0.333166
gamma_cadinene	germacreneD	0.171922	0.192908
myrcene	germacreneD	0.0556067	0.675722
delta_3_carene	germacreneD	-0.0651859	0.623772
X1_8_cineole	germacreneD	-0.0900743	0.497485
verbenone	germacreneD	0.0153946	0.907871
limonene	germacreneD	-0.117147	0.376902
cis_beta_ocimene	germacreneD	0.0878769	0.508077
trans_beta_ocimene	germacreneD	0.244385	0.062127
germacreneA	germacreneD	0.00589097	0.96468
germacreneB	germacreneD	-0.0491819	0.711446
Saureus	bicyclogermacrene	-0.218547	0.0963243
linalool	bicyclogermacrene	0.0118303	0.929138
camphene	bicyclogermacrene	-0.142357	0.282126
camphor	bicyclogermacrene	-0.0810327	0.541788
alpha_phellandrene	bicyclogermacrene	0.017159	0.897365
beta_phellandrene	bicyclogermacrene	0.0923443	0.486666
ortho_cymene	bicyclogermacrene	0.0136215	0.918443
alpha_pinene	bicyclogermacrene	-0.252546	0.053638
beta_pinene	bicyclogermacrene	-0.102501	0.439808
sabinene	bicyclogermacrene	0.321218	0.0131141
gamma_cadinene	bicyclogermacrene	-0.115573	0.383393
myrcene	bicyclogermacrene	-0.0336336	0.800354
delta_3_carene	bicyclogermacrene	0.131474	0.320914
X1_8_cineole	bicyclogermacrene	-0.0810327	0.541788
verbenone	bicyclogermacrene	-0.114931	0.386059
limonene	bicyclogermacrene	-0.230935	0.078448
cis_beta_ocimene	bicyclogermacrene	-0.0810327	0.541788
trans_beta_ocimene	bicyclogermacrene	0.137064	0.300586
germacreneA	bicyclogermacrene	0.255186	0.0511037
germacreneB	bicyclogermacrene	-0.141808	0.284003
germacreneD	bicyclogermacrene	0.27273	0.0366309
Saureus	X1_10_di_epi_cubenol	-0.0181157	0.891676
linalool	X1_10_di_epi_cubenol	-0.0303227	0.81966
camphene	X1_10_di_epi_cubenol	-0.0302893	0.819855
camphor	X1_10_di_epi_cubenol	-0.0172414	0.896875
alpha_phellandrene	X1_10_di_epi_cubenol	-0.024595	0.853305
beta_phellandrene	X1_10_di_epi_cubenol	-0.0476043	0.720317
ortho_cymene	X1_10_di_epi_cubenol	-0.0245918	0.853323
alpha_pinene	X1_10_di_epi_cubenol	-0.114217	0.389035
beta_pinene	X1_10_di_epi_cubenol	-0.0706334	0.595002
sabinene	X1_10_di_epi_cubenol	-0.0245417	0.853619
gamma_cadinene	X1_10_di_epi_cubenol	0.715871	1.85572e-10
myrcene	X1_10_di_epi_cubenol	-0.0342145	0.796979
delta_3_carene	X1_10_di_epi_cubenol	-0.0287092	0.829108
X1_8_cineole	X1_10_di_epi_cubenol	-0.0172414	0.896875
verbenone	X1_10_di_epi_cubenol	-0.0244538	0.854137
limonene	X1_10_di_epi_cubenol	-0.0491362	0.711703
cis_beta_ocimene	X1_10_di_epi_cubenol	-0.0172414	0.896875
trans_beta_ocimene	X1_10_di_epi_cubenol	-0.0245934	0.853314
germacreneA	X1_10_di_epi_cubenol	-0.0244964	0.853887
germacreneB	X1_10_di_epi_cubenol	-0.0301727	0.820538
germacreneD	X1_10_di_epi_cubenol	0.105955	0.424466
bicyclogermacrene	X1_10_di_epi_cubenol	-0.0810327	0.541788
Saureus	bulnesol	-0.0181157	0.891676
linalool	bulnesol	-0.0303227	0.81966
camphene	bulnesol	-0.0302893	0.819855
camphor	bulnesol	-0.0172414	0.896875
alpha_phellandrene	bulnesol	-0.024595	0.853305
beta_phellandrene	bulnesol	-0.0476043	0.720317
ortho_cymene	bulnesol	-0.0245918	0.853323
alpha_pinene	bulnesol	-0.114217	0.389035
beta_pinene	bulnesol	-0.0706334	0.595002
sabinene	bulnesol	-0.0245417	0.853619
gamma_cadinene	bulnesol	-0.0245905	0.853331
myrcene	bulnesol	-0.0342145	0.796979
delta_3_carene	bulnesol	-0.0287092	0.829108
X1_8_cineole	bulnesol	-0.0172414	0.896875
verbenone	bulnesol	-0.0244538	0.854137
limonene	bulnesol	0.416293	0.00104018
cis_beta_ocimene	bulnesol	-0.0172414	0.896875
trans_beta_ocimene	bulnesol	0.690707	1.41442e-09
germacreneA	bulnesol	-0.0244964	0.853887
germacreneB	bulnesol	-0.0301727	0.820538
germacreneD	bulnesol	0.112602	0.395817
bicyclogermacrene	bulnesol	-0.0810327	0.541788
X1_10_di_epi_cubenol	bulnesol	-0.0172414	0.896875
Saureus	cis_beta_guaiene	0.0801769	0.546079
linalool	cis_beta_guaiene	-0.069528	0.600792
camphene	cis_beta_guaiene	-0.0694515	0.601194
camphor	cis_beta_guaiene	-0.0395334	0.766252
alpha_phellandrene	cis_beta_guaiene	-0.0563947	0.671387
beta_phellandrene	cis_beta_guaiene	-0.109154	0.410537
ortho_cymene	cis_beta_guaiene	0.272797	0.0365832
alpha_pinene	cis_beta_guaiene	-0.0312961	0.813973
beta_pinene	cis_beta_guaiene	0.141904	0.283676
sabinene	cis_beta_guaiene	-0.0562725	0.672058
gamma_cadinene	cis_beta_guaiene	0.260252	0.0465128
myrcene	cis_beta_guaiene	0.103917	0.433482
delta_3_carene	cis_beta_guaiene	-0.0658284	0.620348
X1_8_cineole	cis_beta_guaiene	-0.0395334	0.766252
verbenone	cis_beta_guaiene	0.231352	0.0778946
limonene	cis_beta_guaiene	-0.112666	0.395549
cis_beta_ocimene	cis_beta_guaiene	-0.0395334	0.766252
trans_beta_ocimene	cis_beta_guaiene	-0.0563912	0.671406
germacreneA	cis_beta_guaiene	-0.0561686	0.67263
germacreneB	cis_beta_guaiene	-0.069184	0.602599
germacreneD	cis_beta_guaiene	0.241107	0.0658277
bicyclogermacrene	cis_beta_guaiene	-0.185803	0.158852
X1_10_di_epi_cubenol	cis_beta_guaiene	-0.0395334	0.766252
bulnesol	cis_beta_guaiene	-0.0395334	0.766252
Saureus	cis_cis_farnesol	-0.138209	0.296528
linalool	cis_cis_farnesol	-0.0303227	0.81966
camphene	cis_cis_farnesol	-0.0302893	0.819855
camphor	cis_cis_farnesol	-0.0172414	0.896875
alpha_phellandrene	cis_cis_farnesol	-0.024595	0.853305
beta_phellandrene	cis_cis_farnesol	-0.0476043	0.720317
ortho_cymene	cis_cis_farnesol	-0.0245918	0.853323
alpha_pinene	cis_cis_farnesol	-0.114217	0.389035
beta_pinene	cis_cis_farnesol	-0.0706334	0.595002
sabinene	cis_cis_farnesol	-0.0245417	0.853619
gamma_cadinene	cis_cis_farnesol	-0.0245905	0.853331
myrcene	cis_cis_farnesol	-0.0342145	0.796979
delta_3_carene	cis_cis_farnesol	-0.0287092	0.829108
X1_8_cineole	cis_cis_farnesol	-0.0172414	0.896875
verbenone	cis_cis_farnesol	-0.0244538	0.854137
limonene	cis_cis_farnesol	-0.0491362	0.711703
cis_beta_ocimene	cis_cis_farnesol	-0.0172414	0.896875
trans_beta_ocimene	cis_cis_farnesol	-0.0245934	0.853314
germacreneA	cis_cis_farnesol	-0.0244964	0.853887
germacreneB	cis_cis_farnesol	-0.0301727	0.820538
germacreneD	cis_cis_farnesol	-0.0900743	0.497485
bicyclogermacrene	cis_cis_farnesol	-0.0810327	0.541788
X1_10_di_epi_cubenol	cis_cis_farnesol	-0.0172414	0.896875
bulnesol	cis_cis_farnesol	-0.0172414	0.896875
cis_beta_guaiene	cis_cis_farnesol	-0.0395334	0.766252
Saureus	trans_cis_farnesol	-0.138209	0.296528
linalool	trans_cis_farnesol	-0.0303227	0.81966
camphene	trans_cis_farnesol	-0.0302893	0.819855
camphor	trans_cis_farnesol	-0.0172414	0.896875
alpha_phellandrene	trans_cis_farnesol	-0.024595	0.853305
beta_phellandrene	trans_cis_farnesol	-0.0476043	0.720317
ortho_cymene	trans_cis_farnesol	-0.0245918	0.853323
alpha_pinene	trans_cis_farnesol	-0.114217	0.389035
beta_pinene	trans_cis_farnesol	-0.0706334	0.595002
sabinene	trans_cis_farnesol	-0.0245417	0.853619
gamma_cadinene	trans_cis_farnesol	-0.0245905	0.853331
myrcene	trans_cis_farnesol	-0.0342145	0.796979
delta_3_carene	trans_cis_farnesol	-0.0287092	0.829108
X1_8_cineole	trans_cis_farnesol	-0.0172414	0.896875
verbenone	trans_cis_farnesol	-0.0244538	0.854137
limonene	trans_cis_farnesol	-0.0491362	0.711703
cis_beta_ocimene	trans_cis_farnesol	-0.0172414	0.896875
trans_beta_ocimene	trans_cis_farnesol	-0.0245934	0.853314
germacreneA	trans_cis_farnesol	-0.0244964	0.853887
germacreneB	trans_cis_farnesol	-0.0301727	0.820538
germacreneD	trans_cis_farnesol	-0.0900743	0.497485
bicyclogermacrene	trans_cis_farnesol	-0.0810327	0.541788
X1_10_di_epi_cubenol	trans_cis_farnesol	-0.0172414	0.896875
bulnesol	trans_cis_farnesol	-0.0172414	0.896875
cis_beta_guaiene	trans_cis_farnesol	-0.0395334	0.766252
cis_cis_farnesol	trans_cis_farnesol	1	0
Saureus	trans_beta_guaiene	-0.164567	0.212937
linalool	trans_beta_guaiene	-0.076103	0.566724
camphene	trans_beta_guaiene	-0.0760193	0.567152
camphor	trans_beta_guaiene	-0.0432719	0.744864
alpha_phellandrene	trans_beta_guaiene	0.218216	0.0968416
beta_phellandrene	trans_beta_guaiene	0.0471245	0.723022
ortho_cymene	trans_beta_guaiene	0.210733	0.109136
alpha_pinene	trans_beta_guaiene	-0.205031	0.119286
beta_pinene	trans_beta_guaiene	-0.0966604	0.466439
sabinene	trans_beta_guaiene	-0.061594	0.643056
gamma_cadinene	trans_beta_guaiene	0.276123	0.0342675
myrcene	trans_beta_guaiene	0.0764029	0.565192
delta_3_carene	trans_beta_guaiene	-0.0720535	0.5876
X1_8_cineole	trans_beta_guaiene	-0.0432719	0.744864
verbenone	trans_beta_guaiene	-0.0613735	0.644247
limonene	trans_beta_guaiene	-0.12332	0.352095
cis_beta_ocimene	trans_beta_guaiene	-0.0432719	0.744864
trans_beta_ocimene	trans_beta_guaiene	-0.0617239	0.642355
germacreneA	trans_beta_guaiene	-0.0614802	0.643671
germacreneB	trans_beta_guaiene	0.17261	0.191107
germacreneD	trans_beta_guaiene	-0.0204715	0.877692
bicyclogermacrene	trans_beta_guaiene	-0.132816	0.315957
X1_10_di_epi_cubenol	trans_beta_guaiene	0.42085	0.000903263
bulnesol	trans_beta_guaiene	-0.0432719	0.744864
cis_beta_guaiene	trans_beta_guaiene	-0.0992197	0.454664
cis_cis_farnesol	trans_beta_guaiene	-0.0432719	0.744864
trans_cis_farnesol	trans_beta_guaiene	-0.0432719	0.744864
Saureus	trans_caryophyllene	-0.0494382	0.710009
linalool	trans_caryophyllene	0.139356	0.292499
camphene	trans_caryophyllene	-0.171934	0.192877
camphor	trans_caryophyllene	-0.0978688	0.460859
alpha_phellandrene	trans_caryophyllene	0.00440074	0.973611
beta_phellandrene	trans_caryophyllene	-0.270221	0.038464
ortho_cymene	trans_caryophyllene	0.18984	0.149833
alpha_pinene	trans_caryophyllene	-0.242063	0.0647302
beta_pinene	trans_caryophyllene	-0.103853	0.433767
sabinene	trans_caryophyllene	-0.139308	0.292665
gamma_cadinene	trans_caryophyllene	0.198034	0.132706
myrcene	trans_caryophyllene	-0.0893562	0.500934
delta_3_carene	trans_caryophyllene	0.0780817	0.556651
X1_8_cineole	trans_caryophyllene	-0.0978688	0.460859
verbenone	trans_caryophyllene	0.0264537	0.842355
limonene	trans_caryophyllene	-0.167367	0.205146
cis_beta_ocimene	trans_caryophyllene	0.158258	0.231245
trans_beta_ocimene	trans_caryophyllene	0.0732443	0.581425
germacreneA	trans_caryophyllene	0.117676	0.374737
germacreneB	trans_caryophyllene	0.0141119	0.915518
germacreneD	trans_caryophyllene	0.366587	0.00429417
bicyclogermacrene	trans_caryophyllene	0.30364	0.0193927
X1_10_di_epi_cubenol	trans_caryophyllene	0.115837	0.382298
bulnesol	trans_caryophyllene	-0.0978688	0.460859
cis_beta_guaiene	trans_caryophyllene	0.242832	0.0638594
cis_cis_farnesol	trans_caryophyllene	-0.0978688	0.460859
trans_cis_farnesol	trans_caryophyllene	-0.0978688	0.460859
trans_beta_guaiene	trans_caryophyllene	0.0153779	0.90797
Saureus	caryophyllene_oxide	-0.0891353	0.501997
linalool	caryophyllene_oxide	-0.107251	0.41879
camphene	caryophyllene_oxide	-0.107133	0.419305
camphor	caryophyllene_oxide	-0.0609827	0.646362
alpha_phellandrene	caryophyllene_oxide	-0.0869923	0.512373
beta_phellandrene	caryophyllene_oxide	-0.168377	0.202388
ortho_cymene	caryophyllene_oxide	-0.0869812	0.512427
alpha_pinene	caryophyllene_oxide	-0.20269	0.123655
beta_pinene	caryophyllene_oxide	-0.0854851	0.519735
sabinene	caryophyllene_oxide	-0.0868039	0.51329
gamma_cadinene	caryophyllene_oxide	-0.0869765	0.51245
myrcene	caryophyllene_oxide	-0.121017	0.361233
delta_3_carene	caryophyllene_oxide	0.122749	0.354346
X1_8_cineole	caryophyllene_oxide	-0.0609827	0.646362
verbenone	caryophyllene_oxide	-0.0864932	0.514805
limonene	caryophyllene_oxide	-0.173795	0.188032
cis_beta_ocimene	caryophyllene_oxide	-0.0609827	0.646362
trans_beta_ocimene	caryophyllene_oxide	-0.0869869	0.512399
germacreneA	caryophyllene_oxide	-0.0866436	0.514072
germacreneB	caryophyllene_oxide	0.113159	0.393473
germacreneD	caryophyllene_oxide	-0.0421079	0.751504
bicyclogermacrene	caryophyllene_oxide	0.0695413	0.600722
X1_10_di_epi_cubenol	caryophyllene_oxide	-0.0609827	0.646362
bulnesol	caryophyllene_oxide	-0.0609827	0.646362
cis_beta_guaiene	caryophyllene_oxide	-0.00630442	0.962203
cis_cis_farnesol	caryophyllene_oxide	-0.0609827	0.646362
trans_cis_farnesol	caryophyllene_oxide	-0.0609827	0.646362
trans_beta_guaiene	caryophyllene_oxide	-0.0540171	0.684498
trans_caryophyllene	caryophyllene_oxide	0.507902	4.02065e-05
Saureus	spathulenol	-0.237659	0.0699089
linalool	spathulenol	-0.0464697	0.72672
camphene	spathulenol	-0.153386	0.246108
camphor	spathulenol	-0.087311	0.510823
alpha_phellandrene	spathulenol	-0.12455	0.347278
beta_phellandrene	spathulenol	-0.0961775	0.468679
ortho_cymene	spathulenol	-0.124534	0.34734
alpha_pinene	spathulenol	-0.439233	0.000500832
beta_pinene	spathulenol	-0.307203	0.0179462
sabinene	spathulenol	0.191135	0.147022
gamma_cadinene	spathulenol	-0.124527	0.347366
myrcene	spathulenol	-0.0908123	0.493954
delta_3_carene	spathulenol	0.121352	0.359893
X1_8_cineole	spathulenol	0.292301	0.0246734
verbenone	spathulenol	0.173938	0.187662
limonene	spathulenol	-0.248827	0.0573813
cis_beta_ocimene	spathulenol	-0.087311	0.510823
trans_beta_ocimene	spathulenol	0.0100699	0.939662
germacreneA	spathulenol	0.031693	0.811656
germacreneB	spathulenol	0.0324863	0.807032
germacreneD	spathulenol	0.0210502	0.874262
bicyclogermacrene	spathulenol	0.302604	0.0198314
X1_10_di_epi_cubenol	spathulenol	-0.087311	0.510823
bulnesol	spathulenol	-0.087311	0.510823
cis_beta_guaiene	spathulenol	-0.041068	0.757451
cis_cis_farnesol	spathulenol	-0.087311	0.510823
trans_cis_farnesol	spathulenol	-0.087311	0.510823
trans_beta_guaiene	spathulenol	0.0393915	0.767068
trans_caryophyllene	spathulenol	0.199944	0.128935
caryophyllene_oxide	spathulenol	0.422116	0.000868234
Saureus	valencene	-0.138209	0.296528
linalool	valencene	-0.0303227	0.81966
camphene	valencene	-0.0302893	0.819855
camphor	valencene	-0.0172414	0.896875
alpha_phellandrene	valencene	-0.024595	0.853305
beta_phellandrene	valencene	-0.0476043	0.720317
ortho_cymene	valencene	-0.0245918	0.853323
alpha_pinene	valencene	0.0581237	0.661912
beta_pinene	valencene	-0.0706334	0.595002
sabinene	valencene	-0.0245417	0.853619
gamma_cadinene	valencene	-0.0245905	0.853331
myrcene	valencene	-0.0342145	0.796979
delta_3_carene	valencene	-0.0287092	0.829108
X1_8_cineole	valencene	-0.0172414	0.896875
verbenone	valencene	-0.0244538	0.854137
limonene	valencene	-0.0491362	0.711703
cis_beta_ocimene	valencene	-0.0172414	0.896875
trans_beta_ocimene	valencene	-0.0245934	0.853314
germacreneA	valencene	-0.0244964	0.853887
germacreneB	valencene	-0.0301727	0.820538
germacreneD	valencene	-0.0900743	0.497485
bicyclogermacrene	valencene	-0.0810327	0.541788
X1_10_di_epi_cubenol	valencene	-0.0172414	0.896875
bulnesol	valencene	-0.0172414	0.896875
cis_beta_guaiene	valencene	-0.0395334	0.766252
cis_cis_farnesol	valencene	-0.0172414	0.896875
trans_cis_farnesol	valencene	-0.0172414	0.896875
trans_beta_guaiene	valencene	-0.0432719	0.744864
trans_caryophyllene	valencene	-0.0978688	0.460859
caryophyllene_oxide	valencene	-0.0609827	0.646362
spathulenol	valencene	0.190827	0.147688
Saureus	ar.curcumene	-0.138209	0.296528
linalool	ar.curcumene	-0.0303227	0.81966
camphene	ar.curcumene	-0.0302893	0.819855
camphor	ar.curcumene	-0.0172414	0.896875
alpha_phellandrene	ar.curcumene	-0.024595	0.853305
beta_phellandrene	ar.curcumene	-0.0476043	0.720317
ortho_cymene	ar.curcumene	-0.0245918	0.853323
alpha_pinene	ar.curcumene	-0.114217	0.389035
beta_pinene	ar.curcumene	-0.0706334	0.595002
sabinene	ar.curcumene	-0.0245417	0.853619
gamma_cadinene	ar.curcumene	-0.0245905	0.853331
myrcene	ar.curcumene	-0.0342145	0.796979
delta_3_carene	ar.curcumene	-0.0287092	0.829108
X1_8_cineole	ar.curcumene	-0.0172414	0.896875
verbenone	ar.curcumene	-0.0244538	0.854137
limonene	ar.curcumene	-0.0491362	0.711703
cis_beta_ocimene	ar.curcumene	-0.0172414	0.896875
trans_beta_ocimene	ar.curcumene	-0.0245934	0.853314
germacreneA	ar.curcumene	-0.0244964	0.853887
germacreneB	ar.curcumene	-0.0301727	0.820538
germacreneD	ar.curcumene	-0.0900743	0.497485
bicyclogermacrene	ar.curcumene	-0.0810327	0.541788
X1_10_di_epi_cubenol	ar.curcumene	-0.0172414	0.896875
bulnesol	ar.curcumene	-0.0172414	0.896875
cis_beta_guaiene	ar.curcumene	-0.0395334	0.766252
cis_cis_farnesol	ar.curcumene	-0.0172414	0.896875
trans_cis_farnesol	ar.curcumene	-0.0172414	0.896875
trans_beta_guaiene	ar.curcumene	-0.0432719	0.744864
trans_caryophyllene	ar.curcumene	0.103122	0.437027
caryophyllene_oxide	ar.curcumene	0.323761	0.0123697
spathulenol	ar.curcumene	0.288631	0.0266233
valencene	ar.curcumene	-0.0172414	0.896875
Saureus	junipene	-0.138209	0.296528
linalool	junipene	-0.0303227	0.81966
camphene	junipene	-0.0302893	0.819855
camphor	junipene	-0.0172414	0.896875
alpha_phellandrene	junipene	-0.024595	0.853305
beta_phellandrene	junipene	-0.0476043	0.720317
ortho_cymene	junipene	-0.0245918	0.853323
alpha_pinene	junipene	-0.114217	0.389035
beta_pinene	junipene	-0.0706334	0.595002
sabinene	junipene	-0.0245417	0.853619
gamma_cadinene	junipene	-0.0245905	0.853331
myrcene	junipene	-0.0342145	0.796979
delta_3_carene	junipene	-0.0287092	0.829108
X1_8_cineole	junipene	-0.0172414	0.896875
verbenone	junipene	-0.0244538	0.854137
limonene	junipene	-0.0491362	0.711703
cis_beta_ocimene	junipene	-0.0172414	0.896875
trans_beta_ocimene	junipene	-0.0245934	0.853314
germacreneA	junipene	-0.0244964	0.853887
germacreneB	junipene	-0.0301727	0.820538
germacreneD	junipene	-0.0900743	0.497485
bicyclogermacrene	junipene	-0.0810327	0.541788
X1_10_di_epi_cubenol	junipene	-0.0172414	0.896875
bulnesol	junipene	-0.0172414	0.896875
cis_beta_guaiene	junipene	-0.0395334	0.766252
cis_cis_farnesol	junipene	-0.0172414	0.896875
trans_cis_farnesol	junipene	-0.0172414	0.896875
trans_beta_guaiene	junipene	-0.0432719	0.744864
trans_caryophyllene	junipene	0.103122	0.437027
caryophyllene_oxide	junipene	0.323761	0.0123697
spathulenol	junipene	0.288631	0.0266233
valencene	junipene	-0.0172414	0.896875
ar.curcumene	junipene	1	0
Saureus	alpha_selinene	-0.0654662	0.622278
linalool	alpha_selinene	0.250897	0.0552726
camphene	alpha_selinene	-0.0411917	0.756742
camphor	alpha_selinene	-0.0234473	0.86008
alpha_phellandrene	alpha_selinene	-0.0334477	0.801435
beta_phellandrene	alpha_selinene	-0.0647391	0.626157
ortho_cymene	alpha_selinene	-0.0334434	0.80146
alpha_pinene	alpha_selinene	-0.0463837	0.727206
beta_pinene	alpha_selinene	-0.0960573	0.469238
sabinene	alpha_selinene	-0.0333753	0.801857
gamma_cadinene	alpha_selinene	-0.0334416	0.801471
myrcene	alpha_selinene	-0.0465297	0.726381
delta_3_carene	alpha_selinene	-0.0390429	0.769072
X1_8_cineole	alpha_selinene	-0.0234473	0.86008
verbenone	alpha_selinene	-0.0332558	0.802551
limonene	alpha_selinene	0.0287586	0.828819
cis_beta_ocimene	alpha_selinene	-0.0234473	0.86008
trans_beta_ocimene	alpha_selinene	-0.0334456	0.801447
germacreneA	alpha_selinene	-0.0333136	0.802215
germacreneB	alpha_selinene	-0.0410331	0.757651
germacreneD	alpha_selinene	-0.122496	0.355349
bicyclogermacrene	alpha_selinene	-0.1102	0.406039
X1_10_di_epi_cubenol	alpha_selinene	-0.0234473	0.86008
bulnesol	alpha_selinene	-0.0234473	0.86008
cis_beta_guaiene	alpha_selinene	-0.0537631	0.685905
cis_cis_farnesol	alpha_selinene	-0.0234473	0.86008
trans_cis_farnesol	alpha_selinene	-0.0234473	0.86008
trans_beta_guaiene	alpha_selinene	-0.0588473	0.657963
trans_caryophyllene	alpha_selinene	0.191187	0.146909
caryophyllene_oxide	alpha_selinene	0.168558	0.201895
spathulenol	alpha_selinene	0.157691	0.232943
valencene	alpha_selinene	-0.0234473	0.86008
ar.curcumene	alpha_selinene	-0.0234473	0.86008
junipene	alpha_selinene	-0.0234473	0.86008
Saureus	beta_selinene	-0.138209	0.296528
linalool	beta_selinene	-0.0303227	0.81966
camphene	beta_selinene	-0.0302893	0.819855
camphor	beta_selinene	-0.0172414	0.896875
alpha_phellandrene	beta_selinene	0.707381	3.77058e-10
beta_phellandrene	beta_selinene	-0.0476043	0.720317
ortho_cymene	beta_selinene	0.687798	1.76538e-09
alpha_pinene	beta_selinene	-0.114217	0.389035
beta_pinene	beta_selinene	-0.0706334	0.595002
sabinene	beta_selinene	-0.0245417	0.853619
gamma_cadinene	beta_selinene	-0.0245905	0.853331
myrcene	beta_selinene	-0.0342145	0.796979
delta_3_carene	beta_selinene	-0.0287092	0.829108
X1_8_cineole	beta_selinene	-0.0172414	0.896875
verbenone	beta_selinene	-0.0244538	0.854137
limonene	beta_selinene	-0.0491362	0.711703
cis_beta_ocimene	beta_selinene	-0.0172414	0.896875
trans_beta_ocimene	beta_selinene	-0.0245934	0.853314
germacreneA	beta_selinene	-0.0244964	0.853887
germacreneB	beta_selinene	-0.0301727	0.820538
germacreneD	beta_selinene	-0.0900743	0.497485
bicyclogermacrene	beta_selinene	0.103456	0.435535
X1_10_di_epi_cubenol	beta_selinene	-0.0172414	0.896875
bulnesol	beta_selinene	-0.0172414	0.896875
cis_beta_guaiene	beta_selinene	-0.0395334	0.766252
cis_cis_farnesol	beta_selinene	-0.0172414	0.896875
trans_cis_farnesol	beta_selinene	-0.0172414	0.896875
trans_beta_guaiene	beta_selinene	0.345771	0.00731005
trans_caryophyllene	beta_selinene	0.102266	0.440861
caryophyllene_oxide	beta_selinene	-0.0609827	0.646362
spathulenol	beta_selinene	-0.087311	0.510823
valencene	beta_selinene	-0.0172414	0.896875
ar.curcumene	beta_selinene	-0.0172414	0.896875
junipene	beta_selinene	-0.0172414	0.896875
alpha_selinene	beta_selinene	-0.0234473	0.86008
Saureus	guaiol	-0.0481389	0.717307
linalool	guaiol	-0.0303227	0.81966
camphene	guaiol	-0.0302893	0.819855
camphor	guaiol	-0.0172414	0.896875
alpha_phellandrene	guaiol	-0.024595	0.853305
beta_phellandrene	guaiol	-0.0476043	0.720317
ortho_cymene	guaiol	-0.0245918	0.853323
alpha_pinene	guaiol	0.112072	0.398061
beta_pinene	guaiol	0.217484	0.0979942
sabinene	guaiol	-0.0245417	0.853619
gamma_cadinene	guaiol	-0.0245905	0.853331
myrcene	guaiol	-0.0342145	0.796979
delta_3_carene	guaiol	-0.0287092	0.829108
X1_8_cineole	guaiol	-0.0172414	0.896875
verbenone	guaiol	-0.0244538	0.854137
limonene	guaiol	-0.0491362	0.711703
cis_beta_ocimene	guaiol	-0.0172414	0.896875
trans_beta_ocimene	guaiol	-0.0245934	0.853314
germacreneA	guaiol	-0.0244964	0.853887
germacreneB	guaiol	-0.0301727	0.820538
germacreneD	guaiol	0.142144	0.282851
bicyclogermacrene	guaiol	0.0850377	0.52193
X1_10_di_epi_cubenol	guaiol	-0.0172414	0.896875
bulnesol	guaiol	-0.0172414	0.896875
cis_beta_guaiene	guaiol	-0.0395334	0.766252
cis_cis_farnesol	guaiol	-0.0172414	0.896875
trans_cis_farnesol	guaiol	-0.0172414	0.896875
trans_beta_guaiene	guaiol	-0.0432719	0.744864
trans_caryophyllene	guaiol	0.143799	0.277228
caryophyllene_oxide	guaiol	-0.0609827	0.646362
spathulenol	guaiol	-0.087311	0.510823
valencene	guaiol	-0.0172414	0.896875
ar.curcumene	guaiol	-0.0172414	0.896875
junipene	guaiol	-0.0172414	0.896875
alpha_selinene	guaiol	-0.0234473	0.86008
beta_selinene	guaiol	-0.0172414	0.896875
Saureus	beta_elemene	-0.0966901	0.466302
linalool	beta_elemene	0.254399	0.0518491
camphene	beta_elemene	-0.0531834	0.689118
camphor	beta_elemene	-0.0302732	0.81995
alpha_phellandrene	beta_elemene	-0.0431849	0.74536
beta_phellandrene	beta_elemene	-0.0835859	0.529086
ortho_cymene	beta_elemene	-0.0431794	0.745391
alpha_pinene	beta_elemene	-0.200547	0.127761
beta_pinene	beta_elemene	0.0901626	0.497062
sabinene	beta_elemene	-0.0430914	0.745893
gamma_cadinene	beta_elemene	0.351829	0.00628387
myrcene	beta_elemene	-0.0600753	0.651281
delta_3_carene	beta_elemene	-0.050409	0.704573
X1_8_cineole	beta_elemene	-0.0302732	0.81995
verbenone	beta_elemene	-0.0429372	0.746772
limonene	beta_elemene	-0.0862755	0.515867
cis_beta_ocimene	beta_elemene	-0.0302732	0.81995
trans_beta_ocimene	beta_elemene	-0.0431823	0.745375
germacreneA	beta_elemene	0.834887	2.22045e-16
germacreneB	beta_elemene	-0.0529786	0.690255
germacreneD	beta_elemene	0.0815924	0.538991
bicyclogermacrene	beta_elemene	0.170041	0.197897
X1_10_di_epi_cubenol	beta_elemene	0.512383	3.345e-05
bulnesol	beta_elemene	-0.0302732	0.81995
cis_beta_guaiene	beta_elemene	-0.0694145	0.601388
cis_cis_farnesol	beta_elemene	-0.0302732	0.81995
trans_cis_farnesol	beta_elemene	-0.0302732	0.81995
trans_beta_guaiene	beta_elemene	0.171611	0.193727
trans_caryophyllene	beta_elemene	0.130932	0.322932
caryophyllene_oxide	beta_elemene	-0.107076	0.419554
spathulenol	beta_elemene	-0.0387866	0.770546
valencene	beta_elemene	-0.0302732	0.81995
ar.curcumene	beta_elemene	-0.0302732	0.81995
junipene	beta_elemene	-0.0302732	0.81995
alpha_selinene	beta_elemene	-0.0411698	0.756868
beta_selinene	beta_elemene	-0.0302732	0.81995
guaiol	beta_elemene	-0.0302732	0.81995
Saureus	trans_yophyllene	-0.0181157	0.891676
linalool	trans_yophyllene	-0.0303227	0.81966
camphene	trans_yophyllene	-0.0302893	0.819855
camphor	trans_yophyllene	-0.0172414	0.896875
alpha_phellandrene	trans_yophyllene	-0.024595	0.853305
beta_phellandrene	trans_yophyllene	-0.0476043	0.720317
ortho_cymene	trans_yophyllene	-0.0245918	0.853323
alpha_pinene	trans_yophyllene	-0.114217	0.389035
beta_pinene	trans_yophyllene	0.25702	0.0494002
sabinene	trans_yophyllene	-0.0245417	0.853619
gamma_cadinene	trans_yophyllene	-0.0245905	0.853331
myrcene	trans_yophyllene	-0.0342145	0.796979
delta_3_carene	trans_yophyllene	-0.0287092	0.829108
X1_8_cineole	trans_yophyllene	-0.0172414	0.896875
verbenone	trans_yophyllene	-0.0244538	0.854137
limonene	trans_yophyllene	-0.0491362	0.711703
cis_beta_ocimene	trans_yophyllene	-0.0172414	0.896875
trans_beta_ocimene	trans_yophyllene	-0.0245934	0.853314
germacreneA	trans_yophyllene	0.634031	7.01006e-08
germacreneB	trans_yophyllene	-0.0301727	0.820538
germacreneD	trans_yophyllene	0.116714	0.378682
bicyclogermacrene	trans_yophyllene	0.144252	0.275703
X1_10_di_epi_cubenol	trans_yophyllene	-0.0172414	0.896875
bulnesol	trans_yophyllene	-0.0172414	0.896875
cis_beta_guaiene	trans_yophyllene	-0.0395334	0.766252
cis_cis_farnesol	trans_yophyllene	-0.0172414	0.896875
trans_cis_farnesol	trans_yophyllene	-0.0172414	0.896875
trans_beta_guaiene	trans_yophyllene	-0.0432719	0.744864
trans_caryophyllene	trans_yophyllene	-0.0978688	0.460859
caryophyllene_oxide	trans_yophyllene	-0.0609827	0.646362
spathulenol	trans_yophyllene	-0.087311	0.510823
valencene	trans_yophyllene	-0.0172414	0.896875
ar.curcumene	trans_yophyllene	-0.0172414	0.896875
junipene	trans_yophyllene	-0.0172414	0.896875
alpha_selinene	trans_yophyllene	-0.0234473	0.86008
beta_selinene	trans_yophyllene	-0.0172414	0.896875
guaiol	trans_yophyllene	-0.0172414	0.896875
beta_elemene	trans_yophyllene	0.634687	6.73072e-08
Saureus	gamma_muurolene	-0.116716	0.378673
linalool	gamma_muurolene	0.150626	0.254812
camphene	gamma_muurolene	-0.0597445	0.653079
camphor	gamma_muurolene	-0.0340079	0.798179
alpha_phellandrene	gamma_muurolene	-0.0485125	0.715206
beta_phellandrene	gamma_muurolene	0.0196713	0.882438
ortho_cymene	gamma_muurolene	-0.0485063	0.71524
alpha_pinene	gamma_muurolene	-0.225288	0.0862398
beta_pinene	gamma_muurolene	-0.139321	0.292619
sabinene	gamma_muurolene	0.232607	0.0762503
gamma_cadinene	gamma_muurolene	-0.0485037	0.715255
myrcene	gamma_muurolene	0.0890322	0.502494
delta_3_carene	gamma_muurolene	-0.0566277	0.670107
X1_8_cineole	gamma_muurolene	-0.0340079	0.798179
verbenone	gamma_muurolene	-0.0482342	0.716771
limonene	gamma_muurolene	-0.096919	0.465242
cis_beta_ocimene	gamma_muurolene	-0.0340079	0.798179
trans_beta_ocimene	gamma_muurolene	-0.0485095	0.715222
germacreneA	gamma_muurolene	0.257737	0.0487476
germacreneB	gamma_muurolene	-0.0595144	0.65433
germacreneD	gamma_muurolene	-0.177668	0.178228
bicyclogermacrene	gamma_muurolene	0.0627754	0.636687
X1_10_di_epi_cubenol	gamma_muurolene	-0.0340079	0.798179
bulnesol	gamma_muurolene	-0.0340079	0.798179
cis_beta_guaiene	gamma_muurolene	-0.077978	0.557177
cis_cis_farnesol	gamma_muurolene	-0.0340079	0.798179
trans_cis_farnesol	gamma_muurolene	-0.0340079	0.798179
trans_beta_guaiene	gamma_muurolene	0.339026	0.0086222
trans_caryophyllene	gamma_muurolene	0.0614254	0.643967
caryophyllene_oxide	gamma_muurolene	0.0221831	0.867554
spathulenol	gamma_muurolene	0.31922	0.0137258
valencene	gamma_muurolene	-0.0340079	0.798179
ar.curcumene	gamma_muurolene	-0.0340079	0.798179
junipene	gamma_muurolene	-0.0340079	0.798179
alpha_selinene	gamma_muurolene	0.411978	0.00118677
beta_selinene	gamma_muurolene	-0.0340079	0.798179
guaiol	gamma_muurolene	-0.0340079	0.798179
beta_elemene	gamma_muurolene	0.165329	0.210796
trans_yophyllene	gamma_muurolene	-0.0340079	0.798179
Saureus	alpha_humulene	-0.0682251	0.607648
linalool	alpha_humulene	-0.0432549	0.744961
camphene	alpha_humulene	-0.0432073	0.745232
camphor	alpha_humulene	-0.0245946	0.853307
alpha_phellandrene	alpha_humulene	-0.0350843	0.791932
beta_phellandrene	alpha_humulene	-0.0679069	0.609328
ortho_cymene	alpha_humulene	-0.0350799	0.791957
alpha_pinene	alpha_humulene	-0.162929	0.217591
beta_pinene	alpha_humulene	-0.100758	0.447667
sabinene	alpha_humulene	-0.0350084	0.792372
gamma_cadinene	alpha_humulene	-0.035078	0.791969
myrcene	alpha_humulene	-0.0488065	0.713554
delta_3_carene	alpha_humulene	0.309543	0.0170472
X1_8_cineole	alpha_humulene	-0.0245946	0.853307
verbenone	alpha_humulene	-0.0348831	0.793099
limonene	alpha_humulene	0.265317	0.0422663
cis_beta_ocimene	alpha_humulene	-0.0245946	0.853307
trans_beta_ocimene	alpha_humulene	0.480394	0.000117791
germacreneA	alpha_humulene	-0.0349437	0.792747
germacreneB	alpha_humulene	-0.0430409	0.746181
germacreneD	alpha_humulene	0.017568	0.894933
bicyclogermacrene	alpha_humulene	0.0819983	0.536967
X1_10_di_epi_cubenol	alpha_humulene	-0.0245946	0.853307
bulnesol	alpha_humulene	0.708474	3.44655e-10
cis_beta_guaiene	alpha_humulene	-0.0563938	0.671392
cis_cis_farnesol	alpha_humulene	-0.0245946	0.853307
trans_cis_farnesol	alpha_humulene	-0.0245946	0.853307
trans_beta_guaiene	alpha_humulene	-0.0617267	0.642339
trans_caryophyllene	alpha_humulene	0.10215	0.441385
caryophyllene_oxide	alpha_humulene	0.118236	0.372453
spathulenol	alpha_humulene	0.126077	0.341353
valencene	alpha_humulene	-0.0245946	0.853307
ar.curcumene	alpha_humulene	-0.0245946	0.853307
junipene	alpha_humulene	-0.0245946	0.853307
alpha_selinene	alpha_humulene	-0.0334472	0.801438
beta_selinene	alpha_humulene	-0.0245946	0.853307
guaiol	alpha_humulene	-0.0245946	0.853307
beta_elemene	alpha_humulene	-0.0431843	0.745363
trans_yophyllene	alpha_humulene	-0.0245946	0.853307
gamma_muurolene	alpha_humulene	-0.0485118	0.71521
Saureus	trans_nerolidol	-0.0763681	0.56537
linalool	trans_nerolidol	0.396005	0.00190481
camphene	trans_nerolidol	-0.0887425	0.503891
camphor	trans_nerolidol	-0.0505143	0.703984
alpha_phellandrene	trans_nerolidol	0.196596	0.1356
beta_phellandrene	trans_nerolidol	-0.139473	0.29209
ortho_cymene	trans_nerolidol	0.410061	0.00125765
alpha_pinene	trans_nerolidol	-0.18393	0.163169
beta_pinene	trans_nerolidol	0.0795987	0.548987
sabinene	trans_nerolidol	-0.0719029	0.588383
gamma_cadinene	trans_nerolidol	0.140189	0.289595
myrcene	trans_nerolidol	0.0219953	0.868665
delta_3_carene	trans_nerolidol	-0.0841131	0.526482
X1_8_cineole	trans_nerolidol	-0.0505143	0.703984
verbenone	trans_nerolidol	0.121008	0.361265
limonene	trans_nerolidol	0.131038	0.322536
cis_beta_ocimene	trans_nerolidol	-0.0505143	0.703984
trans_beta_ocimene	trans_nerolidol	-0.0720545	0.587595
germacreneA	trans_nerolidol	0.151363	0.252469
germacreneB	trans_nerolidol	0.0834178	0.529918
germacreneD	trans_nerolidol	-0.196436	0.135926
bicyclogermacrene	trans_nerolidol	-0.0873854	0.510461
X1_10_di_epi_cubenol	trans_nerolidol	-0.0505143	0.703984
bulnesol	trans_nerolidol	-0.0505143	0.703984
cis_beta_guaiene	trans_nerolidol	0.0196379	0.882636
cis_cis_farnesol	trans_nerolidol	-0.0505143	0.703984
trans_cis_farnesol	trans_nerolidol	-0.0505143	0.703984
trans_beta_guaiene	trans_nerolidol	0.24195	0.0648595
trans_caryophyllene	trans_nerolidol	0.0461455	0.728553
caryophyllene_oxide	trans_nerolidol	-0.079133	0.551334
spathulenol	trans_nerolidol	-0.1248	0.346302
valencene	trans_nerolidol	-0.0505143	0.703984
ar.curcumene	trans_nerolidol	-0.0505143	0.703984
junipene	trans_nerolidol	-0.0505143	0.703984
alpha_selinene	trans_nerolidol	-0.0686965	0.605164
beta_selinene	trans_nerolidol	0.322841	0.0126348
guaiol	trans_nerolidol	-0.0505143	0.703984
beta_elemene	trans_nerolidol	0.0753742	0.570455
trans_yophyllene	trans_nerolidol	-0.0505143	0.703984
gamma_muurolene	trans_nerolidol	0.0125918	0.92459
alpha_humulene	trans_nerolidol	-0.0720579	0.587577
Saureus	beta_copaen_4_alpha_ol	0.0778936	0.557605
linalool	beta_copaen_4_alpha_ol	-0.0604445	0.649278
camphene	beta_copaen_4_alpha_ol	-0.0603779	0.649639
camphor	beta_copaen_4_alpha_ol	-0.0343685	0.796085
alpha_phellandrene	beta_copaen_4_alpha_ol	-0.0490269	0.712316
beta_phellandrene	beta_copaen_4_alpha_ol	-0.0948932	0.474666
ortho_cymene	beta_copaen_4_alpha_ol	-0.0490207	0.712351
alpha_pinene	beta_copaen_4_alpha_ol	-0.166712	0.206951
beta_pinene	beta_copaen_4_alpha_ol	0.0679707	0.608991
sabinene	beta_copaen_4_alpha_ol	-0.0489207	0.712912
gamma_cadinene	beta_copaen_4_alpha_ol	-0.049018	0.712366
myrcene	beta_copaen_4_alpha_ol	-0.0682022	0.607769
delta_3_carene	beta_copaen_4_alpha_ol	-0.0572282	0.666813
X1_8_cineole	beta_copaen_4_alpha_ol	-0.0343685	0.796085
verbenone	beta_copaen_4_alpha_ol	-0.0487456	0.713896
limonene	beta_copaen_4_alpha_ol	0.182022	0.167654
cis_beta_ocimene	beta_copaen_4_alpha_ol	-0.0343685	0.796085
trans_beta_ocimene	beta_copaen_4_alpha_ol	-0.0490239	0.712333
germacreneA	beta_copaen_4_alpha_ol	-0.0488304	0.71342
germacreneB	beta_copaen_4_alpha_ol	0.234902	0.0733157
germacreneD	beta_copaen_4_alpha_ol	-0.179552	0.173595
bicyclogermacrene	beta_copaen_4_alpha_ol	-0.0119173	0.928618
X1_10_di_epi_cubenol	beta_copaen_4_alpha_ol	-0.0343685	0.796085
bulnesol	beta_copaen_4_alpha_ol	-0.0343685	0.796085
cis_beta_guaiene	beta_copaen_4_alpha_ol	-0.0788048	0.552991
cis_cis_farnesol	beta_copaen_4_alpha_ol	-0.0343685	0.796085
trans_cis_farnesol	beta_copaen_4_alpha_ol	-0.0343685	0.796085
trans_beta_guaiene	beta_copaen_4_alpha_ol	0.083821	0.527924
trans_caryophyllene	beta_copaen_4_alpha_ol	-0.195089	0.138683
caryophyllene_oxide	beta_copaen_4_alpha_ol	-0.121561	0.359059
spathulenol	beta_copaen_4_alpha_ol	-0.0471495	0.722881
valencene	beta_copaen_4_alpha_ol	-0.0343685	0.796085
ar.curcumene	beta_copaen_4_alpha_ol	-0.0343685	0.796085
junipene	beta_copaen_4_alpha_ol	-0.0343685	0.796085
alpha_selinene	beta_copaen_4_alpha_ol	-0.0467391	0.725198
beta_selinene	beta_copaen_4_alpha_ol	-0.0343685	0.796085
guaiol	beta_copaen_4_alpha_ol	-0.0343685	0.796085
beta_elemene	beta_copaen_4_alpha_ol	-0.0603458	0.649814
trans_yophyllene	beta_copaen_4_alpha_ol	-0.0343685	0.796085
gamma_muurolene	beta_copaen_4_alpha_ol	-0.0677904	0.609943
alpha_humulene	beta_copaen_4_alpha_ol	-0.0490261	0.71232
trans_nerolidol	beta_copaen_4_alpha_ol	0.383672	0.00270244
Saureus	beta_gurjunene	-0.0181157	0.891676
linalool	beta_gurjunene	-0.0303227	0.81966
camphene	beta_gurjunene	-0.0302893	0.819855
camphor	beta_gurjunene	-0.0172414	0.896875
alpha_phellandrene	beta_gurjunene	-0.024595	0.853305
beta_phellandrene	beta_gurjunene	-0.0476043	0.720317
ortho_cymene	beta_gurjunene	-0.0245918	0.853323
alpha_pinene	beta_gurjunene	-0.114217	0.389035
beta_pinene	beta_gurjunene	-0.0706334	0.595002
sabinene	beta_gurjunene	-0.0245417	0.853619
gamma_cadinene	beta_gurjunene	-0.0245905	0.853331
myrcene	beta_gurjunene	-0.0342145	0.796979
delta_3_carene	beta_gurjunene	-0.0287092	0.829108
X1_8_cineole	beta_gurjunene	-0.0172414	0.896875
verbenone	beta_gurjunene	-0.0244538	0.854137
limonene	beta_gurjunene	-0.0491362	0.711703
cis_beta_ocimene	beta_gurjunene	-0.0172414	0.896875
trans_beta_ocimene	beta_gurjunene	-0.0245934	0.853314
germacreneA	beta_gurjunene	-0.0244964	0.853887
germacreneB	beta_gurjunene	-0.0301727	0.820538
germacreneD	beta_gurjunene	0.140667	0.287936
bicyclogermacrene	beta_gurjunene	-0.0810327	0.541788
X1_10_di_epi_cubenol	beta_gurjunene	-0.0172414	0.896875
bulnesol	beta_gurjunene	-0.0172414	0.896875
cis_beta_guaiene	beta_gurjunene	-0.0395334	0.766252
cis_cis_farnesol	beta_gurjunene	-0.0172414	0.896875
trans_cis_farnesol	beta_gurjunene	-0.0172414	0.896875
trans_beta_guaiene	beta_gurjunene	-0.0432719	0.744864
trans_caryophyllene	beta_gurjunene	0.265632	0.0420127
caryophyllene_oxide	beta_gurjunene	0.28283	0.0299686
spathulenol	beta_gurjunene	0.114827	0.386491
valencene	beta_gurjunene	-0.0172414	0.896875
ar.curcumene	beta_gurjunene	-0.0172414	0.896875
junipene	beta_gurjunene	-0.0172414	0.896875
alpha_selinene	beta_gurjunene	-0.0234473	0.86008
beta_selinene	beta_gurjunene	-0.0172414	0.896875
guaiol	beta_gurjunene	-0.0172414	0.896875
beta_elemene	beta_gurjunene	-0.0302732	0.81995
trans_yophyllene	beta_gurjunene	-0.0172414	0.896875
gamma_muurolene	beta_gurjunene	-0.0340079	0.798179
alpha_humulene	beta_gurjunene	-0.0245946	0.853307
trans_nerolidol	beta_gurjunene	-0.0505143	0.703984
beta_copaen_4_alpha_ol	beta_gurjunene	-0.0343685	0.796085
Saureus	oxygenate_sesquiterpene	-0.138209	0.296528
linalool	oxygenate_sesquiterpene	-0.0303227	0.81966
camphene	oxygenate_sesquiterpene	-0.0302893	0.819855
camphor	oxygenate_sesquiterpene	-0.0172414	0.896875
alpha_phellandrene	oxygenate_sesquiterpene	-0.024595	0.853305
beta_phellandrene	oxygenate_sesquiterpene	-0.0476043	0.720317
ortho_cymene	oxygenate_sesquiterpene	-0.0245918	0.853323
alpha_pinene	oxygenate_sesquiterpene	0.191635	0.145947
beta_pinene	oxygenate_sesquiterpene	0.322489	0.0127375
sabinene	oxygenate_sesquiterpene	-0.0245417	0.853619
gamma_cadinene	oxygenate_sesquiterpene	-0.0245905	0.853331
myrcene	oxygenate_sesquiterpene	-0.0342145	0.796979
delta_3_carene	oxygenate_sesquiterpene	-0.0287092	0.829108
X1_8_cineole	oxygenate_sesquiterpene	-0.0172414	0.896875
verbenone	oxygenate_sesquiterpene	-0.0244538	0.854137
limonene	oxygenate_sesquiterpene	-0.0491362	0.711703
cis_beta_ocimene	oxygenate_sesquiterpene	-0.0172414	0.896875
trans_beta_ocimene	oxygenate_sesquiterpene	-0.0245934	0.853314
germacreneA	oxygenate_sesquiterpene	-0.0244964	0.853887
germacreneB	oxygenate_sesquiterpene	-0.0301727	0.820538
germacreneD	oxygenate_sesquiterpene	-0.0900743	0.497485
bicyclogermacrene	oxygenate_sesquiterpene	0.20326	0.12258
X1_10_di_epi_cubenol	oxygenate_sesquiterpene	-0.0172414	0.896875
bulnesol	oxygenate_sesquiterpene	-0.0172414	0.896875
cis_beta_guaiene	oxygenate_sesquiterpene	-0.0395334	0.766252
cis_cis_farnesol	oxygenate_sesquiterpene	-0.0172414	0.896875
trans_cis_farnesol	oxygenate_sesquiterpene	-0.0172414	0.896875
trans_beta_guaiene	oxygenate_sesquiterpene	-0.0432719	0.744864
trans_caryophyllene	oxygenate_sesquiterpene	-0.0978688	0.460859
caryophyllene_oxide	oxygenate_sesquiterpene	-0.0609827	0.646362
spathulenol	oxygenate_sesquiterpene	-0.087311	0.510823
valencene	oxygenate_sesquiterpene	-0.0172414	0.896875
ar.curcumene	oxygenate_sesquiterpene	-0.0172414	0.896875
junipene	oxygenate_sesquiterpene	-0.0172414	0.896875
alpha_selinene	oxygenate_sesquiterpene	-0.0234473	0.86008
beta_selinene	oxygenate_sesquiterpene	-0.0172414	0.896875
guaiol	oxygenate_sesquiterpene	-0.0172414	0.896875
beta_elemene	oxygenate_sesquiterpene	-0.0302732	0.81995
trans_yophyllene	oxygenate_sesquiterpene	-0.0172414	0.896875
gamma_muurolene	oxygenate_sesquiterpene	-0.0340079	0.798179
alpha_humulene	oxygenate_sesquiterpene	-0.0245946	0.853307
trans_nerolidol	oxygenate_sesquiterpene	-0.0505143	0.703984
beta_copaen_4_alpha_ol	oxygenate_sesquiterpene	-0.0343685	0.796085
beta_gurjunene	oxygenate_sesquiterpene	-0.0172414	0.896875
Saureus	delta_cadinene	-0.0481389	0.717307
linalool	delta_cadinene	0.593603	7.22571e-07
camphene	delta_cadinene	-0.0302893	0.819855
camphor	delta_cadinene	-0.0172414	0.896875
alpha_phellandrene	delta_cadinene	-0.024595	0.853305
beta_phellandrene	delta_cadinene	-0.0476043	0.720317
ortho_cymene	delta_cadinene	-0.0245918	0.853323
alpha_pinene	delta_cadinene	0.118461	0.371535
beta_pinene	delta_cadinene	-0.0706334	0.595002
sabinene	delta_cadinene	-0.0245417	0.853619
gamma_cadinene	delta_cadinene	-0.0245905	0.853331
myrcene	delta_cadinene	-0.0342145	0.796979
delta_3_carene	delta_cadinene	-0.0287092	0.829108
X1_8_cineole	delta_cadinene	-0.0172414	0.896875
verbenone	delta_cadinene	-0.0244538	0.854137
limonene	delta_cadinene	0.155001	0.241114
cis_beta_ocimene	delta_cadinene	-0.0172414	0.896875
trans_beta_ocimene	delta_cadinene	-0.0245934	0.853314
germacreneA	delta_cadinene	-0.0244964	0.853887
germacreneB	delta_cadinene	-0.0301727	0.820538
germacreneD	delta_cadinene	-0.0900743	0.497485
bicyclogermacrene	delta_cadinene	-0.0810327	0.541788
X1_10_di_epi_cubenol	delta_cadinene	-0.0172414	0.896875
bulnesol	delta_cadinene	-0.0172414	0.896875
cis_beta_guaiene	delta_cadinene	-0.0395334	0.766252
cis_cis_farnesol	delta_cadinene	-0.0172414	0.896875
trans_cis_farnesol	delta_cadinene	-0.0172414	0.896875
trans_beta_guaiene	delta_cadinene	-0.0432719	0.744864
trans_caryophyllene	delta_cadinene	0.122168	0.356648
caryophyllene_oxide	delta_cadinene	-0.0609827	0.646362
spathulenol	delta_cadinene	-0.087311	0.510823
valencene	delta_cadinene	-0.0172414	0.896875
ar.curcumene	delta_cadinene	-0.0172414	0.896875
junipene	delta_cadinene	-0.0172414	0.896875
alpha_selinene	delta_cadinene	0.452845	0.000316616
beta_selinene	delta_cadinene	-0.0172414	0.896875
guaiol	delta_cadinene	-0.0172414	0.896875
beta_elemene	delta_cadinene	-0.0302732	0.81995
trans_yophyllene	delta_cadinene	-0.0172414	0.896875
gamma_muurolene	delta_cadinene	-0.0340079	0.798179
alpha_humulene	delta_cadinene	-0.0245946	0.853307
trans_nerolidol	delta_cadinene	-0.0505143	0.703984
beta_copaen_4_alpha_ol	delta_cadinene	-0.0343685	0.796085
beta_gurjunene	delta_cadinene	-0.0172414	0.896875
oxygenate_sesquiterpene	delta_cadinene	-0.0172414	0.896875
Saureus	dihyidro_beta_agarofuran	-0.0695673	0.600586
linalool	dihyidro_beta_agarofuran	-0.0432472	0.745005
camphene	dihyidro_beta_agarofuran	0.833507	2.22045e-16
camphor	dihyidro_beta_agarofuran	-0.0245902	0.853333
alpha_phellandrene	dihyidro_beta_agarofuran	-0.0350781	0.791968
beta_phellandrene	dihyidro_beta_agarofuran	-0.0678948	0.609392
ortho_cymene	dihyidro_beta_agarofuran	-0.0350736	0.791994
alpha_pinene	dihyidro_beta_agarofuran	0.159465	0.227663
beta_pinene	dihyidro_beta_agarofuran	-0.10074	0.447749
sabinene	dihyidro_beta_agarofuran	-0.0350021	0.792408
gamma_cadinene	dihyidro_beta_agarofuran	-0.0350717	0.792005
myrcene	dihyidro_beta_agarofuran	-0.0487978	0.713603
delta_3_carene	dihyidro_beta_agarofuran	-0.040946	0.758149
X1_8_cineole	dihyidro_beta_agarofuran	-0.0245902	0.853333
verbenone	dihyidro_beta_agarofuran	-0.0348769	0.793135
limonene	dihyidro_beta_agarofuran	-0.0700796	0.5979
cis_beta_ocimene	dihyidro_beta_agarofuran	-0.0245902	0.853333
trans_beta_ocimene	dihyidro_beta_agarofuran	-0.0350759	0.79198
germacreneA	dihyidro_beta_agarofuran	-0.0349375	0.792783
germacreneB	dihyidro_beta_agarofuran	-0.0430332	0.746224
germacreneD	dihyidro_beta_agarofuran	-0.128467	0.332203
bicyclogermacrene	dihyidro_beta_agarofuran	-0.115571	0.383398
X1_10_di_epi_cubenol	dihyidro_beta_agarofuran	-0.0245902	0.853333
bulnesol	dihyidro_beta_agarofuran	-0.0245902	0.853333
cis_beta_guaiene	dihyidro_beta_agarofuran	-0.0563838	0.671447
cis_cis_farnesol	dihyidro_beta_agarofuran	-0.0245902	0.853333
trans_cis_farnesol	dihyidro_beta_agarofuran	-0.0245902	0.853333
trans_beta_guaiene	dihyidro_beta_agarofuran	-0.0617158	0.642398
trans_caryophyllene	dihyidro_beta_agarofuran	-0.139584	0.291702
caryophyllene_oxide	dihyidro_beta_agarofuran	-0.0869755	0.512455
spathulenol	dihyidro_beta_agarofuran	-0.124526	0.347372
valencene	dihyidro_beta_agarofuran	-0.0245902	0.853333
ar.curcumene	dihyidro_beta_agarofuran	-0.0245902	0.853333
junipene	dihyidro_beta_agarofuran	-0.0245902	0.853333
alpha_selinene	dihyidro_beta_agarofuran	-0.0334412	0.801473
beta_selinene	dihyidro_beta_agarofuran	-0.0245902	0.853333
guaiol	dihyidro_beta_agarofuran	-0.0245902	0.853333
beta_elemene	dihyidro_beta_agarofuran	-0.0431766	0.745407
trans_yophyllene	dihyidro_beta_agarofuran	-0.0245902	0.853333
gamma_muurolene	dihyidro_beta_agarofuran	-0.0485032	0.715258
alpha_humulene	dihyidro_beta_agarofuran	-0.0350776	0.791971
trans_nerolidol	dihyidro_beta_agarofuran	-0.0720451	0.587644
beta_copaen_4_alpha_ol	dihyidro_beta_agarofuran	-0.0490174	0.712369
beta_gurjunene	dihyidro_beta_agarofuran	-0.0245902	0.853333
oxygenate_sesquiterpene	dihyidro_beta_agarofuran	-0.0245902	0.853333
delta_cadinene	dihyidro_beta_agarofuran	-0.0245902	0.853333
Saureus	X10._epi_gamma_eudesmol	-0.0678143	0.609817
linalool	X10._epi_gamma_eudesmol	-0.0432486	0.744997
camphene	X10._epi_gamma_eudesmol	0.830642	4.44089e-16
camphor	X10._epi_gamma_eudesmol	-0.024591	0.853328
alpha_phellandrene	X10._epi_gamma_eudesmol	-0.0350792	0.791961
beta_phellandrene	X10._epi_gamma_eudesmol	-0.067897	0.60938
ortho_cymene	X10._epi_gamma_eudesmol	-0.0350748	0.791987
alpha_pinene	X10._epi_gamma_eudesmol	0.159321	0.228088
beta_pinene	X10._epi_gamma_eudesmol	-0.100743	0.447734
sabinene	X10._epi_gamma_eudesmol	-0.0350032	0.792402
gamma_cadinene	X10._epi_gamma_eudesmol	-0.0350728	0.791998
myrcene	X10._epi_gamma_eudesmol	-0.0487993	0.713594
delta_3_carene	X10._epi_gamma_eudesmol	-0.0409473	0.758142
X1_8_cineole	X10._epi_gamma_eudesmol	-0.024591	0.853328
verbenone	X10._epi_gamma_eudesmol	-0.034878	0.793128
limonene	X10._epi_gamma_eudesmol	-0.0700818	0.597888
cis_beta_ocimene	X10._epi_gamma_eudesmol	-0.024591	0.853328
trans_beta_ocimene	X10._epi_gamma_eudesmol	-0.0350771	0.791974
germacreneA	X10._epi_gamma_eudesmol	-0.0349386	0.792777
germacreneB	X10._epi_gamma_eudesmol	-0.0430346	0.746216
germacreneD	X10._epi_gamma_eudesmol	-0.128471	0.332188
bicyclogermacrene	X10._epi_gamma_eudesmol	-0.115575	0.383383
X1_10_di_epi_cubenol	X10._epi_gamma_eudesmol	-0.024591	0.853328
bulnesol	X10._epi_gamma_eudesmol	-0.024591	0.853328
cis_beta_guaiene	X10._epi_gamma_eudesmol	-0.0563856	0.671437
cis_cis_farnesol	X10._epi_gamma_eudesmol	-0.024591	0.853328
trans_cis_farnesol	X10._epi_gamma_eudesmol	-0.024591	0.853328
trans_beta_guaiene	X10._epi_gamma_eudesmol	-0.0617177	0.642388
trans_caryophyllene	X10._epi_gamma_eudesmol	-0.139588	0.291687
caryophyllene_oxide	X10._epi_gamma_eudesmol	-0.0869783	0.512441
spathulenol	X10._epi_gamma_eudesmol	-0.12453	0.347356
valencene	X10._epi_gamma_eudesmol	-0.024591	0.853328
ar.curcumene	X10._epi_gamma_eudesmol	-0.024591	0.853328
junipene	X10._epi_gamma_eudesmol	-0.024591	0.853328
alpha_selinene	X10._epi_gamma_eudesmol	-0.0334423	0.801467
beta_selinene	X10._epi_gamma_eudesmol	-0.024591	0.853328
guaiol	X10._epi_gamma_eudesmol	-0.024591	0.853328
beta_elemene	X10._epi_gamma_eudesmol	-0.043178	0.745399
trans_yophyllene	X10._epi_gamma_eudesmol	-0.024591	0.853328
gamma_muurolene	X10._epi_gamma_eudesmol	-0.0485047	0.715249
alpha_humulene	X10._epi_gamma_eudesmol	-0.0350787	0.791964
trans_nerolidol	X10._epi_gamma_eudesmol	-0.0720474	0.587632
beta_copaen_4_alpha_ol	X10._epi_gamma_eudesmol	-0.049019	0.71236
beta_gurjunene	X10._epi_gamma_eudesmol	-0.024591	0.853328
oxygenate_sesquiterpene	X10._epi_gamma_eudesmol	-0.024591	0.853328
delta_cadinene	X10._epi_gamma_eudesmol	-0.024591	0.853328
dihyidro_beta_agarofuran	X10._epi_gamma_eudesmol	0.999131	0
Saureus	X4_epi_cis_dihydro_agarofuran	-0.0181157	0.891676
linalool	X4_epi_cis_dihydro_agarofuran	-0.0303227	0.81966
camphene	X4_epi_cis_dihydro_agarofuran	0.533891	1.33292e-05
camphor	X4_epi_cis_dihydro_agarofuran	-0.0172414	0.896875
alpha_phellandrene	X4_epi_cis_dihydro_agarofuran	-0.024595	0.853305
beta_phellandrene	X4_epi_cis_dihydro_agarofuran	-0.0476043	0.720317
ortho_cymene	X4_epi_cis_dihydro_agarofuran	-0.0245918	0.853323
alpha_pinene	X4_epi_cis_dihydro_agarofuran	0.109205	0.410316
beta_pinene	X4_epi_cis_dihydro_agarofuran	-0.0706334	0.595002
sabinene	X4_epi_cis_dihydro_agarofuran	-0.0245417	0.853619
gamma_cadinene	X4_epi_cis_dihydro_agarofuran	-0.0245905	0.853331
myrcene	X4_epi_cis_dihydro_agarofuran	-0.0342145	0.796979
delta_3_carene	X4_epi_cis_dihydro_agarofuran	-0.0287092	0.829108
X1_8_cineole	X4_epi_cis_dihydro_agarofuran	-0.0172414	0.896875
verbenone	X4_epi_cis_dihydro_agarofuran	-0.0244538	0.854137
limonene	X4_epi_cis_dihydro_agarofuran	-0.0491362	0.711703
cis_beta_ocimene	X4_epi_cis_dihydro_agarofuran	-0.0172414	0.896875
trans_beta_ocimene	X4_epi_cis_dihydro_agarofuran	-0.0245934	0.853314
germacreneA	X4_epi_cis_dihydro_agarofuran	-0.0244964	0.853887
germacreneB	X4_epi_cis_dihydro_agarofuran	-0.0301727	0.820538
germacreneD	X4_epi_cis_dihydro_agarofuran	-0.0900743	0.497485
bicyclogermacrene	X4_epi_cis_dihydro_agarofuran	-0.0810327	0.541788
X1_10_di_epi_cubenol	X4_epi_cis_dihydro_agarofuran	-0.0172414	0.896875
bulnesol	X4_epi_cis_dihydro_agarofuran	-0.0172414	0.896875
cis_beta_guaiene	X4_epi_cis_dihydro_agarofuran	-0.0395334	0.766252
cis_cis_farnesol	X4_epi_cis_dihydro_agarofuran	-0.0172414	0.896875
trans_cis_farnesol	X4_epi_cis_dihydro_agarofuran	-0.0172414	0.896875
trans_beta_guaiene	X4_epi_cis_dihydro_agarofuran	-0.0432719	0.744864
trans_caryophyllene	X4_epi_cis_dihydro_agarofuran	-0.0978688	0.460859
caryophyllene_oxide	X4_epi_cis_dihydro_agarofuran	-0.0609827	0.646362
spathulenol	X4_epi_cis_dihydro_agarofuran	-0.087311	0.510823
valencene	X4_epi_cis_dihydro_agarofuran	-0.0172414	0.896875
ar.curcumene	X4_epi_cis_dihydro_agarofuran	-0.0172414	0.896875
junipene	X4_epi_cis_dihydro_agarofuran	-0.0172414	0.896875
alpha_selinene	X4_epi_cis_dihydro_agarofuran	-0.0234473	0.86008
beta_selinene	X4_epi_cis_dihydro_agarofuran	-0.0172414	0.896875
guaiol	X4_epi_cis_dihydro_agarofuran	-0.0172414	0.896875
beta_elemene	X4_epi_cis_dihydro_agarofuran	-0.0302732	0.81995
trans_yophyllene	X4_epi_cis_dihydro_agarofuran	-0.0172414	0.896875
gamma_muurolene	X4_epi_cis_dihydro_agarofuran	-0.0340079	0.798179
alpha_humulene	X4_epi_cis_dihydro_agarofuran	-0.0245946	0.853307
trans_nerolidol	X4_epi_cis_dihydro_agarofuran	-0.0505143	0.703984
beta_copaen_4_alpha_ol	X4_epi_cis_dihydro_agarofuran	-0.0343685	0.796085
beta_gurjunene	X4_epi_cis_dihydro_agarofuran	-0.0172414	0.896875
oxygenate_sesquiterpene	X4_epi_cis_dihydro_agarofuran	-0.0172414	0.896875
delta_cadinene	X4_epi_cis_dihydro_agarofuran	-0.0172414	0.896875
dihyidro_beta_agarofuran	X4_epi_cis_dihydro_agarofuran	0.685405	2.1145e-09
X10._epi_gamma_eudesmol	X4_epi_cis_dihydro_agarofuran	0.715162	1.97086e-10
Saureus	cubenol	0.162024	0.220191
linalool	cubenol	-0.0303227	0.81966
camphene	cubenol	-0.0302893	0.819855
camphor	cubenol	-0.0172414	0.896875
alpha_phellandrene	cubenol	-0.024595	0.853305
beta_phellandrene	cubenol	-0.0476043	0.720317
ortho_cymene	cubenol	-0.0245918	0.853323
alpha_pinene	cubenol	-0.114217	0.389035
beta_pinene	cubenol	-0.0706334	0.595002
sabinene	cubenol	-0.0245417	0.853619
gamma_cadinene	cubenol	-0.0245905	0.853331
myrcene	cubenol	-0.0342145	0.796979
delta_3_carene	cubenol	-0.0287092	0.829108
X1_8_cineole	cubenol	-0.0172414	0.896875
verbenone	cubenol	-0.0244538	0.854137
limonene	cubenol	-0.0491362	0.711703
cis_beta_ocimene	cubenol	-0.0172414	0.896875
trans_beta_ocimene	cubenol	-0.0245934	0.853314
germacreneA	cubenol	-0.0244964	0.853887
germacreneB	cubenol	-0.0301727	0.820538
germacreneD	cubenol	-0.0900743	0.497485
bicyclogermacrene	cubenol	0.136444	0.302799
X1_10_di_epi_cubenol	cubenol	-0.0172414	0.896875
bulnesol	cubenol	-0.0172414	0.896875
cis_beta_guaiene	cubenol	-0.0395334	0.766252
cis_cis_farnesol	cubenol	-0.0172414	0.896875
trans_cis_farnesol	cubenol	-0.0172414	0.896875
trans_beta_guaiene	cubenol	-0.0432719	0.744864
trans_caryophyllene	cubenol	-0.0978688	0.460859
caryophyllene_oxide	cubenol	-0.0609827	0.646362
spathulenol	cubenol	-0.087311	0.510823
valencene	cubenol	-0.0172414	0.896875
ar.curcumene	cubenol	-0.0172414	0.896875
junipene	cubenol	-0.0172414	0.896875
alpha_selinene	cubenol	-0.0234473	0.86008
beta_selinene	cubenol	-0.0172414	0.896875
guaiol	cubenol	-0.0172414	0.896875
beta_elemene	cubenol	-0.0302732	0.81995
trans_yophyllene	cubenol	-0.0172414	0.896875
gamma_muurolene	cubenol	-0.0340079	0.798179
alpha_humulene	cubenol	-0.0245946	0.853307
trans_nerolidol	cubenol	-0.0505143	0.703984
beta_copaen_4_alpha_ol	cubenol	0.665434	8.94213e-09
beta_gurjunene	cubenol	-0.0172414	0.896875
oxygenate_sesquiterpene	cubenol	-0.0172414	0.896875
delta_cadinene	cubenol	-0.0172414	0.896875
dihyidro_beta_agarofuran	cubenol	-0.0245902	0.853333
X10._epi_gamma_eudesmol	cubenol	-0.024591	0.853328
X4_epi_cis_dihydro_agarofuran	cubenol	-0.0172414	0.896875
Saureus	beta_bourbonene	-0.0481389	0.717307
linalool	beta_bourbonene	-0.0303227	0.81966
camphene	beta_bourbonene	-0.0302893	0.819855
camphor	beta_bourbonene	-0.0172414	0.896875
alpha_phellandrene	beta_bourbonene	-0.024595	0.853305
beta_phellandrene	beta_bourbonene	-0.0476043	0.720317
ortho_cymene	beta_bourbonene	-0.0245918	0.853323
alpha_pinene	beta_bourbonene	-0.114217	0.389035
beta_pinene	beta_bourbonene	-0.0706334	0.595002
sabinene	beta_bourbonene	-0.0245417	0.853619
gamma_cadinene	beta_bourbonene	-0.0245905	0.853331
myrcene	beta_bourbonene	-0.0342145	0.796979
delta_3_carene	beta_bourbonene	-0.0287092	0.829108
X1_8_cineole	beta_bourbonene	-0.0172414	0.896875
verbenone	beta_bourbonene	-0.0244538	0.854137
limonene	beta_bourbonene	-0.0491362	0.711703
cis_beta_ocimene	beta_bourbonene	-0.0172414	0.896875
trans_beta_ocimene	beta_bourbonene	-0.0245934	0.853314
germacreneA	beta_bourbonene	-0.0244964	0.853887
germacreneB	beta_bourbonene	-0.0301727	0.820538
germacreneD	beta_bourbonene	-0.0900743	0.497485
bicyclogermacrene	beta_bourbonene	-0.0810327	0.541788
X1_10_di_epi_cubenol	beta_bourbonene	-0.0172414	0.896875
bulnesol	beta_bourbonene	-0.0172414	0.896875
cis_beta_guaiene	beta_bourbonene	-0.0395334	0.766252
cis_cis_farnesol	beta_bourbonene	-0.0172414	0.896875
trans_cis_farnesol	beta_bourbonene	-0.0172414	0.896875
trans_beta_guaiene	beta_bourbonene	0.551124	6.08634e-06
trans_caryophyllene	beta_bourbonene	-0.0978688	0.460859
caryophyllene_oxide	beta_bourbonene	-0.0609827	0.646362
spathulenol	beta_bourbonene	0.172337	0.191822
valencene	beta_bourbonene	-0.0172414	0.896875
ar.curcumene	beta_bourbonene	-0.0172414	0.896875
junipene	beta_bourbonene	-0.0172414	0.896875
alpha_selinene	beta_bourbonene	-0.0234473	0.86008
beta_selinene	beta_bourbonene	-0.0172414	0.896875
guaiol	beta_bourbonene	-0.0172414	0.896875
beta_elemene	beta_bourbonene	-0.0302732	0.81995
trans_yophyllene	beta_bourbonene	-0.0172414	0.896875
gamma_muurolene	beta_bourbonene	0.692268	1.25444e-09
alpha_humulene	beta_bourbonene	-0.0245946	0.853307
trans_nerolidol	beta_bourbonene	-0.0505143	0.703984
beta_copaen_4_alpha_ol	beta_bourbonene	-0.0343685	0.796085
beta_gurjunene	beta_bourbonene	-0.0172414	0.896875
oxygenate_sesquiterpene	beta_bourbonene	-0.0172414	0.896875
delta_cadinene	beta_bourbonene	-0.0172414	0.896875
dihyidro_beta_agarofuran	beta_bourbonene	-0.0245902	0.853333
X10._epi_gamma_eudesmol	beta_bourbonene	-0.024591	0.853328
X4_epi_cis_dihydro_agarofuran	beta_bourbonene	-0.0172414	0.896875
cubenol	beta_bourbonene	-0.0172414	0.896875
Saureus	beta_bisabolene	-0.0181157	0.891676
linalool	beta_bisabolene	-0.0303227	0.81966
camphene	beta_bisabolene	-0.0302893	0.819855
camphor	beta_bisabolene	-0.0172414	0.896875
alpha_phellandrene	beta_bisabolene	-0.024595	0.853305
beta_phellandrene	beta_bisabolene	-0.0476043	0.720317
ortho_cymene	beta_bisabolene	-0.0245918	0.853323
alpha_pinene	beta_bisabolene	-0.114217	0.389035
beta_pinene	beta_bisabolene	-0.0706334	0.595002
sabinene	beta_bisabolene	-0.0245417	0.853619
gamma_cadinene	beta_bisabolene	0.715871	1.85572e-10
myrcene	beta_bisabolene	-0.0342145	0.796979
delta_3_carene	beta_bisabolene	-0.0287092	0.829108
X1_8_cineole	beta_bisabolene	-0.0172414	0.896875
verbenone	beta_bisabolene	-0.0244538	0.854137
limonene	beta_bisabolene	-0.0491362	0.711703
cis_beta_ocimene	beta_bisabolene	-0.0172414	0.896875
trans_beta_ocimene	beta_bisabolene	-0.0245934	0.853314
germacreneA	beta_bisabolene	-0.0244964	0.853887
germacreneB	beta_bisabolene	-0.0301727	0.820538
germacreneD	beta_bisabolene	0.105955	0.424466
bicyclogermacrene	beta_bisabolene	-0.0810327	0.541788
X1_10_di_epi_cubenol	beta_bisabolene	1	0
bulnesol	beta_bisabolene	-0.0172414	0.896875
cis_beta_guaiene	beta_bisabolene	-0.0395334	0.766252
cis_cis_farnesol	beta_bisabolene	-0.0172414	0.896875
trans_cis_farnesol	beta_bisabolene	-0.0172414	0.896875
trans_beta_guaiene	beta_bisabolene	0.42085	0.000903263
trans_caryophyllene	beta_bisabolene	0.115837	0.382298
caryophyllene_oxide	beta_bisabolene	-0.0609827	0.646362
spathulenol	beta_bisabolene	-0.087311	0.510823
valencene	beta_bisabolene	-0.0172414	0.896875
ar.curcumene	beta_bisabolene	-0.0172414	0.896875
junipene	beta_bisabolene	-0.0172414	0.896875
alpha_selinene	beta_bisabolene	-0.0234473	0.86008
beta_selinene	beta_bisabolene	-0.0172414	0.896875
guaiol	beta_bisabolene	-0.0172414	0.896875
beta_elemene	beta_bisabolene	0.512383	3.345e-05
trans_yophyllene	beta_bisabolene	-0.0172414	0.896875
gamma_muurolene	beta_bisabolene	-0.0340079	0.798179
alpha_humulene	beta_bisabolene	-0.0245946	0.853307
trans_nerolidol	beta_bisabolene	-0.0505143	0.703984
beta_copaen_4_alpha_ol	beta_bisabolene	-0.0343685	0.796085
beta_gurjunene	beta_bisabolene	-0.0172414	0.896875
oxygenate_sesquiterpene	beta_bisabolene	-0.0172414	0.896875
delta_cadinene	beta_bisabolene	-0.0172414	0.896875
dihyidro_beta_agarofuran	beta_bisabolene	-0.0245902	0.853333
X10._epi_gamma_eudesmol	beta_bisabolene	-0.024591	0.853328
X4_epi_cis_dihydro_agarofuran	beta_bisabolene	-0.0172414	0.896875
cubenol	beta_bisabolene	-0.0172414	0.896875
beta_bourbonene	beta_bisabolene	-0.0172414	0.896875
Saureus	aromadendrene	-0.0481389	0.717307
linalool	aromadendrene	-0.0303227	0.81966
camphene	aromadendrene	-0.0302893	0.819855
camphor	aromadendrene	-0.0172414	0.896875
alpha_phellandrene	aromadendrene	-0.024595	0.853305
beta_phellandrene	aromadendrene	-0.0476043	0.720317
ortho_cymene	aromadendrene	-0.0245918	0.853323
alpha_pinene	aromadendrene	-0.114217	0.389035
beta_pinene	aromadendrene	-0.0706334	0.595002
sabinene	aromadendrene	-0.0245417	0.853619
gamma_cadinene	aromadendrene	-0.0245905	0.853331
myrcene	aromadendrene	-0.0342145	0.796979
delta_3_carene	aromadendrene	0.343485	0.0077339
X1_8_cineole	aromadendrene	-0.0172414	0.896875
verbenone	aromadendrene	-0.0244538	0.854137
limonene	aromadendrene	-0.0491362	0.711703
cis_beta_ocimene	aromadendrene	-0.0172414	0.896875
trans_beta_ocimene	aromadendrene	-0.0245934	0.853314
germacreneA	aromadendrene	-0.0244964	0.853887
germacreneB	aromadendrene	-0.0301727	0.820538
germacreneD	aromadendrene	0.141692	0.284402
bicyclogermacrene	aromadendrene	0.273598	0.0360136
X1_10_di_epi_cubenol	aromadendrene	-0.0172414	0.896875
bulnesol	aromadendrene	-0.0172414	0.896875
cis_beta_guaiene	aromadendrene	-0.0395334	0.766252
cis_cis_farnesol	aromadendrene	-0.0172414	0.896875
trans_cis_farnesol	aromadendrene	-0.0172414	0.896875
trans_beta_guaiene	aromadendrene	-0.0432719	0.744864
trans_caryophyllene	aromadendrene	0.103972	0.433239
caryophyllene_oxide	aromadendrene	0.164122	0.214194
spathulenol	aromadendrene	0.167984	0.203457
valencene	aromadendrene	-0.0172414	0.896875
ar.curcumene	aromadendrene	-0.0172414	0.896875
junipene	aromadendrene	-0.0172414	0.896875
alpha_selinene	aromadendrene	-0.0234473	0.86008
beta_selinene	aromadendrene	-0.0172414	0.896875
guaiol	aromadendrene	-0.0172414	0.896875
beta_elemene	aromadendrene	-0.0302732	0.81995
trans_yophyllene	aromadendrene	-0.0172414	0.896875
gamma_muurolene	aromadendrene	-0.0340079	0.798179
alpha_humulene	aromadendrene	-0.0245946	0.853307
trans_nerolidol	aromadendrene	-0.0505143	0.703984
beta_copaen_4_alpha_ol	aromadendrene	-0.0343685	0.796085
beta_gurjunene	aromadendrene	-0.0172414	0.896875
oxygenate_sesquiterpene	aromadendrene	-0.0172414	0.896875
delta_cadinene	aromadendrene	-0.0172414	0.896875
dihyidro_beta_agarofuran	aromadendrene	-0.0245902	0.853333
X10._epi_gamma_eudesmol	aromadendrene	-0.024591	0.853328
X4_epi_cis_dihydro_agarofuran	aromadendrene	-0.0172414	0.896875
cubenol	aromadendrene	-0.0172414	0.896875
beta_bourbonene	aromadendrene	-0.0172414	0.896875
beta_bisabolene	aromadendrene	-0.0172414	0.896875
Saureus	elemicine	0.0119075	0.928677
linalool	elemicine	-0.0303227	0.81966
camphene	elemicine	-0.0302893	0.819855
camphor	elemicine	-0.0172414	0.896875
alpha_phellandrene	elemicine	-0.024595	0.853305
beta_phellandrene	elemicine	-0.0476043	0.720317
ortho_cymene	elemicine	-0.0245918	0.853323
alpha_pinene	elemicine	-0.114217	0.389035
beta_pinene	elemicine	-0.0706334	0.595002
sabinene	elemicine	-0.0245417	0.853619
gamma_cadinene	elemicine	-0.0245905	0.853331
myrcene	elemicine	-0.0342145	0.796979
delta_3_carene	elemicine	-0.0287092	0.829108
X1_8_cineole	elemicine	-0.0172414	0.896875
verbenone	elemicine	-0.0244538	0.854137
limonene	elemicine	-0.0491362	0.711703
cis_beta_ocimene	elemicine	-0.0172414	0.896875
trans_beta_ocimene	elemicine	-0.0245934	0.853314
germacreneA	elemicine	-0.0244964	0.853887
germacreneB	elemicine	-0.0301727	0.820538
germacreneD	elemicine	0.129184	0.329487
bicyclogermacrene	elemicine	-0.0810327	0.541788
X1_10_di_epi_cubenol	elemicine	-0.0172414	0.896875
bulnesol	elemicine	-0.0172414	0.896875
cis_beta_guaiene	elemicine	0.478728	0.000125351
cis_cis_farnesol	elemicine	-0.0172414	0.896875
trans_cis_farnesol	elemicine	-0.0172414	0.896875
trans_beta_guaiene	elemicine	-0.0432719	0.744864
trans_caryophyllene	elemicine	0.106276	0.423055
caryophyllene_oxide	elemicine	0.2011	0.126693
spathulenol	elemicine	0.22503	0.0866102
valencene	elemicine	-0.0172414	0.896875
ar.curcumene	elemicine	-0.0172414	0.896875
junipene	elemicine	-0.0172414	0.896875
alpha_selinene	elemicine	-0.0234473	0.86008
beta_selinene	elemicine	-0.0172414	0.896875
guaiol	elemicine	-0.0172414	0.896875
beta_elemene	elemicine	-0.0302732	0.81995
trans_yophyllene	elemicine	-0.0172414	0.896875
gamma_muurolene	elemicine	-0.0340079	0.798179
alpha_humulene	elemicine	-0.0245946	0.853307
trans_nerolidol	elemicine	-0.0505143	0.703984
beta_copaen_4_alpha_ol	elemicine	-0.0343685	0.796085
beta_gurjunene	elemicine	-0.0172414	0.896875
oxygenate_sesquiterpene	elemicine	-0.0172414	0.896875
delta_cadinene	elemicine	-0.0172414	0.896875
dihyidro_beta_agarofuran	elemicine	-0.0245902	0.853333
X10._epi_gamma_eudesmol	elemicine	-0.024591	0.853328
X4_epi_cis_dihydro_agarofuran	elemicine	-0.0172414	0.896875
cubenol	elemicine	-0.0172414	0.896875
beta_bourbonene	elemicine	-0.0172414	0.896875
beta_bisabolene	elemicine	-0.0172414	0.896875
aromadendrene	elemicine	-0.0172414	0.896875
Saureus	asaricin	-0.118468	0.371507
linalool	asaricin	-0.0523067	0.693988
camphene	asaricin	-0.0522491	0.694308
camphor	asaricin	-0.0297414	0.823061
alpha_phellandrene	asaricin	-0.0424263	0.749686
beta_phellandrene	asaricin	-0.0821175	0.536373
ortho_cymene	asaricin	-0.0424209	0.749717
alpha_pinene	asaricin	-0.126591	0.33937
beta_pinene	asaricin	-0.121843	0.35794
sabinene	asaricin	-0.0423344	0.75021
gamma_cadinene	asaricin	-0.0424186	0.74973
myrcene	asaricin	-0.05902	0.657022
delta_3_carene	asaricin	-0.0495234	0.709531
X1_8_cineole	asaricin	-0.0297414	0.823061
verbenone	asaricin	-0.0421829	0.751075
limonene	asaricin	-0.0847599	0.523296
cis_beta_ocimene	asaricin	-0.0297414	0.823061
trans_beta_ocimene	asaricin	-0.0424237	0.749701
germacreneA	asaricin	-0.0422562	0.750657
germacreneB	asaricin	-0.0520479	0.695428
germacreneD	asaricin	-0.155378	0.239954
bicyclogermacrene	asaricin	-0.139781	0.291012
X1_10_di_epi_cubenol	asaricin	-0.0297414	0.823061
bulnesol	asaricin	-0.0297414	0.823061
cis_beta_guaiene	asaricin	-0.0681951	0.607806
cis_cis_farnesol	asaricin	-0.0297414	0.823061
trans_cis_farnesol	asaricin	-0.0297414	0.823061
trans_beta_guaiene	asaricin	-0.0746441	0.574205
trans_caryophyllene	asaricin	-0.168824	0.201175
caryophyllene_oxide	asaricin	-0.105195	0.427815
spathulenol	asaricin	-0.036941	0.781187
valencene	asaricin	0.38599	0.00253309
ar.curcumene	asaricin	-0.0297414	0.823061
junipene	asaricin	-0.0297414	0.823061
alpha_selinene	asaricin	-0.0404466	0.761011
beta_selinene	asaricin	-0.0297414	0.823061
guaiol	asaricin	-0.0297414	0.823061
beta_elemene	asaricin	-0.0522213	0.694463
trans_yophyllene	asaricin	-0.0297414	0.823061
gamma_muurolene	asaricin	-0.0586637	0.658964
alpha_humulene	asaricin	-0.0424257	0.749689
trans_nerolidol	asaricin	-0.0871372	0.511668
beta_copaen_4_alpha_ol	asaricin	-0.0592857	0.655575
beta_gurjunene	asaricin	-0.0297414	0.823061
oxygenate_sesquiterpene	asaricin	-0.0297414	0.823061
delta_cadinene	asaricin	-0.0297414	0.823061
dihyidro_beta_agarofuran	asaricin	-0.0424181	0.749733
X10._epi_gamma_eudesmol	asaricin	-0.0424195	0.749725
X4_epi_cis_dihydro_agarofuran	asaricin	-0.0297414	0.823061
cubenol	asaricin	-0.0297414	0.823061
beta_bourbonene	asaricin	-0.0297414	0.823061
beta_bisabolene	asaricin	-0.0297414	0.823061
aromadendrene	asaricin	-0.0297414	0.823061
elemicine	asaricin	-0.0297414	0.823061
Saureus	safrol	-0.138977	0.293826
linalool	safrol	-0.0534328	0.687735
camphene	safrol	-0.053374	0.688061
camphor	safrol	-0.0303817	0.819315
alpha_phellandrene	safrol	-0.0433397	0.744478
beta_phellandrene	safrol	-0.0838854	0.527606
ortho_cymene	safrol	-0.0433342	0.74451
alpha_pinene	safrol	-0.0965453	0.466973
beta_pinene	safrol	-0.124466	0.347606
sabinene	safrol	-0.0432458	0.745013
gamma_cadinene	safrol	-0.0433318	0.744523
myrcene	safrol	-0.0602907	0.650113
delta_3_carene	safrol	-0.0505896	0.703563
X1_8_cineole	safrol	-0.0303817	0.819315
verbenone	safrol	-0.0430911	0.745895
limonene	safrol	-0.0865847	0.514359
cis_beta_ocimene	safrol	-0.0303817	0.819315
trans_beta_ocimene	safrol	-0.043337	0.744493
germacreneA	safrol	-0.043166	0.745468
germacreneB	safrol	-0.0531684	0.689201
germacreneD	safrol	-0.158723	0.229859
bicyclogermacrene	safrol	-0.142791	0.280646
X1_10_di_epi_cubenol	safrol	-0.0303817	0.819315
bulnesol	safrol	-0.0303817	0.819315
cis_beta_guaiene	safrol	-0.0696633	0.600082
cis_cis_farnesol	safrol	-0.0303817	0.819315
trans_cis_farnesol	safrol	-0.0303817	0.819315
trans_beta_guaiene	safrol	-0.0762511	0.565967
trans_caryophyllene	safrol	-0.172458	0.191503
caryophyllene_oxide	safrol	-0.10746	0.41788
spathulenol	safrol	0.0151526	0.909312
valencene	safrol	0.587732	9.87844e-07
ar.curcumene	safrol	-0.0303817	0.819315
junipene	safrol	-0.0303817	0.819315
alpha_selinene	safrol	-0.0413173	0.756024
beta_selinene	safrol	-0.0303817	0.819315
guaiol	safrol	-0.0303817	0.819315
beta_elemene	safrol	-0.0533456	0.688218
trans_yophyllene	safrol	-0.0303817	0.819315
gamma_muurolene	safrol	-0.0599266	0.652089
alpha_humulene	safrol	-0.0433391	0.744482
trans_nerolidol	safrol	-0.0890131	0.502586
beta_copaen_4_alpha_ol	safrol	-0.060562	0.648641
beta_gurjunene	safrol	-0.0303817	0.819315
oxygenate_sesquiterpene	safrol	-0.0303817	0.819315
delta_cadinene	safrol	-0.0303817	0.819315
dihyidro_beta_agarofuran	safrol	-0.0433313	0.744526
X10._epi_gamma_eudesmol	safrol	-0.0433327	0.744518
X4_epi_cis_dihydro_agarofuran	safrol	-0.0303817	0.819315
cubenol	safrol	-0.0303817	0.819315
beta_bourbonene	safrol	-0.0303817	0.819315
beta_bisabolene	safrol	-0.0303817	0.819315
aromadendrene	safrol	-0.0303817	0.819315
elemicine	safrol	-0.0303817	0.819315
asaricin	safrol	0.973201	0
Saureus	methyl_iso_eugenol	0.582349	1.30878e-06
linalool	methyl_iso_eugenol	-0.0303227	0.81966
camphene	methyl_iso_eugenol	-0.0302893	0.819855
camphor	methyl_iso_eugenol	-0.0172414	0.896875
alpha_phellandrene	methyl_iso_eugenol	-0.024595	0.853305
beta_phellandrene	methyl_iso_eugenol	-0.0476043	0.720317
ortho_cymene	methyl_iso_eugenol	-0.0245918	0.853323
alpha_pinene	methyl_iso_eugenol	-0.114217	0.389035
beta_pinene	methyl_iso_eugenol	-0.0706334	0.595002
sabinene	methyl_iso_eugenol	-0.0245417	0.853619
gamma_cadinene	methyl_iso_eugenol	-0.0245905	0.853331
myrcene	methyl_iso_eugenol	-0.0342145	0.796979
delta_3_carene	methyl_iso_eugenol	-0.0287092	0.829108
X1_8_cineole	methyl_iso_eugenol	-0.0172414	0.896875
verbenone	methyl_iso_eugenol	-0.0244538	0.854137
limonene	methyl_iso_eugenol	-0.0491362	0.711703
cis_beta_ocimene	methyl_iso_eugenol	-0.0172414	0.896875
trans_beta_ocimene	methyl_iso_eugenol	-0.0245934	0.853314
germacreneA	methyl_iso_eugenol	-0.0244964	0.853887
germacreneB	methyl_iso_eugenol	-0.0301727	0.820538
germacreneD	methyl_iso_eugenol	-0.0900743	0.497485
bicyclogermacrene	methyl_iso_eugenol	-0.0810327	0.541788
X1_10_di_epi_cubenol	methyl_iso_eugenol	-0.0172414	0.896875
bulnesol	methyl_iso_eugenol	-0.0172414	0.896875
cis_beta_guaiene	methyl_iso_eugenol	-0.0395334	0.766252
cis_cis_farnesol	methyl_iso_eugenol	-0.0172414	0.896875
trans_cis_farnesol	methyl_iso_eugenol	-0.0172414	0.896875
trans_beta_guaiene	methyl_iso_eugenol	-0.0432719	0.744864
trans_caryophyllene	methyl_iso_eugenol	-0.0978688	0.460859
caryophyllene_oxide	methyl_iso_eugenol	-0.0609827	0.646362
spathulenol	methyl_iso_eugenol	-0.087311	0.510823
valencene	methyl_iso_eugenol	-0.0172414	0.896875
ar.curcumene	methyl_iso_eugenol	-0.0172414	0.896875
junipene	methyl_iso_eugenol	-0.0172414	0.896875
alpha_selinene	methyl_iso_eugenol	-0.0234473	0.86008
beta_selinene	methyl_iso_eugenol	-0.0172414	0.896875
guaiol	methyl_iso_eugenol	-0.0172414	0.896875
beta_elemene	methyl_iso_eugenol	-0.0302732	0.81995
trans_yophyllene	methyl_iso_eugenol	-0.0172414	0.896875
gamma_muurolene	methyl_iso_eugenol	-0.0340079	0.798179
alpha_humulene	methyl_iso_eugenol	-0.0245946	0.853307
trans_nerolidol	methyl_iso_eugenol	-0.0505143	0.703984
beta_copaen_4_alpha_ol	methyl_iso_eugenol	-0.0343685	0.796085
beta_gurjunene	methyl_iso_eugenol	-0.0172414	0.896875
oxygenate_sesquiterpene	methyl_iso_eugenol	-0.0172414	0.896875
delta_cadinene	methyl_iso_eugenol	-0.0172414	0.896875
dihyidro_beta_agarofuran	methyl_iso_eugenol	-0.0245902	0.853333
X10._epi_gamma_eudesmol	methyl_iso_eugenol	-0.024591	0.853328
X4_epi_cis_dihydro_agarofuran	methyl_iso_eugenol	-0.0172414	0.896875
cubenol	methyl_iso_eugenol	-0.0172414	0.896875
beta_bourbonene	methyl_iso_eugenol	-0.0172414	0.896875
beta_bisabolene	methyl_iso_eugenol	-0.0172414	0.896875
aromadendrene	methyl_iso_eugenol	-0.0172414	0.896875
elemicine	methyl_iso_eugenol	-0.0172414	0.896875
asaricin	methyl_iso_eugenol	-0.0297414	0.823061
safrol	methyl_iso_eugenol	-0.0303817	0.819315
Saureus	methyl_eugenol	0.407214	0.00136996
linalool	methyl_eugenol	-0.0424655	0.749462
camphene	methyl_eugenol	0.274801	0.035173
camphor	methyl_eugenol	0.552321	5.75428e-06
alpha_phellandrene	methyl_eugenol	-0.034444	0.795646
beta_phellandrene	methyl_eugenol	-0.0666676	0.615889
ortho_cymene	methyl_eugenol	-0.0344397	0.795672
alpha_pinene	methyl_eugenol	-0.159955	0.226217
beta_pinene	methyl_eugenol	-0.0989187	0.45604
sabinene	methyl_eugenol	-0.0343694	0.796079
gamma_cadinene	methyl_eugenol	-0.0344378	0.795683
myrcene	methyl_eugenol	-0.0479157	0.718563
delta_3_carene	methyl_eugenol	-0.0402059	0.762392
X1_8_cineole	methyl_eugenol	-0.0241457	0.855956
verbenone	methyl_eugenol	-0.0342464	0.796794
limonene	methyl_eugenol	0.0786602	0.553722
cis_beta_ocimene	methyl_eugenol	-0.0241457	0.855956
trans_beta_ocimene	methyl_eugenol	-0.0344419	0.795659
germacreneA	methyl_eugenol	-0.034306	0.796448
germacreneB	methyl_eugenol	-0.0422554	0.750662
germacreneD	methyl_eugenol	-0.126145	0.341089
bicyclogermacrene	methyl_eugenol	-0.113482	0.392112
X1_10_di_epi_cubenol	methyl_eugenol	-0.0241457	0.855956
bulnesol	methyl_eugenol	-0.0241457	0.855956
cis_beta_guaiene	methyl_eugenol	-0.0553646	0.677056
cis_cis_farnesol	methyl_eugenol	-0.0241457	0.855956
trans_cis_farnesol	methyl_eugenol	-0.0241457	0.855956
trans_beta_guaiene	methyl_eugenol	-0.0606002	0.648434
trans_caryophyllene	methyl_eugenol	-0.137061	0.300598
caryophyllene_oxide	methyl_eugenol	-0.0854034	0.520135
spathulenol	methyl_eugenol	-0.122275	0.356224
valencene	methyl_eugenol	-0.0241457	0.855956
ar.curcumene	methyl_eugenol	-0.0241457	0.855956
junipene	methyl_eugenol	-0.0241457	0.855956
alpha_selinene	methyl_eugenol	-0.0328368	0.80499
beta_selinene	methyl_eugenol	-0.0241457	0.855956
guaiol	methyl_eugenol	-0.0241457	0.855956
beta_elemene	methyl_eugenol	-0.0423962	0.749858
trans_yophyllene	methyl_eugenol	-0.0241457	0.855956
gamma_muurolene	methyl_eugenol	-0.0476264	0.720192
alpha_humulene	methyl_eugenol	-0.0344435	0.795649
trans_nerolidol	methyl_eugenol	-0.0707428	0.59443
beta_copaen_4_alpha_ol	methyl_eugenol	-0.0481314	0.717349
beta_gurjunene	methyl_eugenol	-0.0241457	0.855956
oxygenate_sesquiterpene	methyl_eugenol	-0.0241457	0.855956
delta_cadinene	methyl_eugenol	-0.0241457	0.855956
dihyidro_beta_agarofuran	methyl_eugenol	-0.0344374	0.795685
X10._epi_gamma_eudesmol	methyl_eugenol	-0.0344385	0.795678
X4_epi_cis_dihydro_agarofuran	methyl_eugenol	-0.0241457	0.855956
cubenol	methyl_eugenol	-0.0241457	0.855956
beta_bourbonene	methyl_eugenol	-0.0241457	0.855956
beta_bisabolene	methyl_eugenol	-0.0241457	0.855956
aromadendrene	methyl_eugenol	-0.0241457	0.855956
elemicine	methyl_eugenol	-0.0241457	0.855956
asaricin	methyl_eugenol	-0.0416514	0.754113
safrol	methyl_eugenol	-0.0425481	0.748991
methyl_iso_eugenol	methyl_eugenol	0.823985	1.11022e-15
Saureus	benzyl_salicylate	-0.0181157	0.891676
linalool	benzyl_salicylate	-0.0303227	0.81966
camphene	benzyl_salicylate	-0.0302893	0.819855
camphor	benzyl_salicylate	-0.0172414	0.896875
alpha_phellandrene	benzyl_salicylate	-0.024595	0.853305
beta_phellandrene	benzyl_salicylate	-0.0476043	0.720317
ortho_cymene	benzyl_salicylate	-0.0245918	0.853323
alpha_pinene	benzyl_salicylate	0.0977038	0.461619
beta_pinene	benzyl_salicylate	0.149812	0.257419
sabinene	benzyl_salicylate	-0.0245417	0.853619
gamma_cadinene	benzyl_salicylate	-0.0245905	0.853331
myrcene	benzyl_salicylate	-0.0342145	0.796979
delta_3_carene	benzyl_salicylate	-0.0287092	0.829108
X1_8_cineole	benzyl_salicylate	-0.0172414	0.896875
verbenone	benzyl_salicylate	-0.0244538	0.854137
limonene	benzyl_salicylate	-0.0491362	0.711703
cis_beta_ocimene	benzyl_salicylate	-0.0172414	0.896875
trans_beta_ocimene	benzyl_salicylate	-0.0245934	0.853314
germacreneA	benzyl_salicylate	-0.0244964	0.853887
germacreneB	benzyl_salicylate	-0.0301727	0.820538
germacreneD	benzyl_salicylate	-0.0900743	0.497485
bicyclogermacrene	benzyl_salicylate	-0.0810327	0.541788
X1_10_di_epi_cubenol	benzyl_salicylate	-0.0172414	0.896875
bulnesol	benzyl_salicylate	-0.0172414	0.896875
cis_beta_guaiene	benzyl_salicylate	-0.0395334	0.766252
cis_cis_farnesol	benzyl_salicylate	-0.0172414	0.896875
trans_cis_farnesol	benzyl_salicylate	-0.0172414	0.896875
trans_beta_guaiene	benzyl_salicylate	-0.0432719	0.744864
trans_caryophyllene	benzyl_salicylate	-0.0978688	0.460859
caryophyllene_oxide	benzyl_salicylate	-0.0609827	0.646362
spathulenol	benzyl_salicylate	0.145662	0.270987
valencene	benzyl_salicylate	-0.0172414	0.896875
ar.curcumene	benzyl_salicylate	-0.0172414	0.896875
junipene	benzyl_salicylate	-0.0172414	0.896875
alpha_selinene	benzyl_salicylate	-0.0234473	0.86008
beta_selinene	benzyl_salicylate	-0.0172414	0.896875
guaiol	benzyl_salicylate	-0.0172414	0.896875
beta_elemene	benzyl_salicylate	-0.0302732	0.81995
trans_yophyllene	benzyl_salicylate	-0.0172414	0.896875
gamma_muurolene	benzyl_salicylate	-0.0340079	0.798179
alpha_humulene	benzyl_salicylate	-0.0245946	0.853307
trans_nerolidol	benzyl_salicylate	-0.0505143	0.703984
beta_copaen_4_alpha_ol	benzyl_salicylate	-0.0343685	0.796085
beta_gurjunene	benzyl_salicylate	-0.0172414	0.896875
oxygenate_sesquiterpene	benzyl_salicylate	-0.0172414	0.896875
delta_cadinene	benzyl_salicylate	-0.0172414	0.896875
dihyidro_beta_agarofuran	benzyl_salicylate	-0.0245902	0.853333
X10._epi_gamma_eudesmol	benzyl_salicylate	-0.024591	0.853328
X4_epi_cis_dihydro_agarofuran	benzyl_salicylate	-0.0172414	0.896875
cubenol	benzyl_salicylate	-0.0172414	0.896875
beta_bourbonene	benzyl_salicylate	-0.0172414	0.896875
beta_bisabolene	benzyl_salicylate	-0.0172414	0.896875
aromadendrene	benzyl_salicylate	-0.0172414	0.896875
elemicine	benzyl_salicylate	-0.0172414	0.896875
asaricin	benzyl_salicylate	-0.0297414	0.823061
safrol	benzyl_salicylate	-0.0303817	0.819315
methyl_iso_eugenol	benzyl_salicylate	-0.0172414	0.896875
methyl_eugenol	benzyl_salicylate	-0.0241457	0.855956
Saureus	benzyl_benzoate	-0.0181157	0.891676
linalool	benzyl_benzoate	-0.0303227	0.81966
camphene	benzyl_benzoate	-0.0302893	0.819855
camphor	benzyl_benzoate	-0.0172414	0.896875
alpha_phellandrene	benzyl_benzoate	-0.024595	0.853305
beta_phellandrene	benzyl_benzoate	-0.0476043	0.720317
ortho_cymene	benzyl_benzoate	-0.0245918	0.853323
alpha_pinene	benzyl_benzoate	0.0977038	0.461619
beta_pinene	benzyl_benzoate	0.149812	0.257419
sabinene	benzyl_benzoate	-0.0245417	0.853619
gamma_cadinene	benzyl_benzoate	-0.0245905	0.853331
myrcene	benzyl_benzoate	-0.0342145	0.796979
delta_3_carene	benzyl_benzoate	-0.0287092	0.829108
X1_8_cineole	benzyl_benzoate	-0.0172414	0.896875
verbenone	benzyl_benzoate	-0.0244538	0.854137
limonene	benzyl_benzoate	-0.0491362	0.711703
cis_beta_ocimene	benzyl_benzoate	-0.0172414	0.896875
trans_beta_ocimene	benzyl_benzoate	-0.0245934	0.853314
germacreneA	benzyl_benzoate	-0.0244964	0.853887
germacreneB	benzyl_benzoate	-0.0301727	0.820538
germacreneD	benzyl_benzoate	-0.0900743	0.497485
bicyclogermacrene	benzyl_benzoate	-0.0810327	0.541788
X1_10_di_epi_cubenol	benzyl_benzoate	-0.0172414	0.896875
bulnesol	benzyl_benzoate	-0.0172414	0.896875
cis_beta_guaiene	benzyl_benzoate	-0.0395334	0.766252
cis_cis_farnesol	benzyl_benzoate	-0.0172414	0.896875
trans_cis_farnesol	benzyl_benzoate	-0.0172414	0.896875
trans_beta_guaiene	benzyl_benzoate	-0.0432719	0.744864
trans_caryophyllene	benzyl_benzoate	-0.0978688	0.460859
caryophyllene_oxide	benzyl_benzoate	-0.0609827	0.646362
spathulenol	benzyl_benzoate	0.145662	0.270987
valencene	benzyl_benzoate	-0.0172414	0.896875
ar.curcumene	benzyl_benzoate	-0.0172414	0.896875
junipene	benzyl_benzoate	-0.0172414	0.896875
alpha_selinene	benzyl_benzoate	-0.0234473	0.86008
beta_selinene	benzyl_benzoate	-0.0172414	0.896875
guaiol	benzyl_benzoate	-0.0172414	0.896875
beta_elemene	benzyl_benzoate	-0.0302732	0.81995
trans_yophyllene	benzyl_benzoate	-0.0172414	0.896875
gamma_muurolene	benzyl_benzoate	-0.0340079	0.798179
alpha_humulene	benzyl_benzoate	-0.0245946	0.853307
trans_nerolidol	benzyl_benzoate	-0.0505143	0.703984
beta_copaen_4_alpha_ol	benzyl_benzoate	-0.0343685	0.796085
beta_gurjunene	benzyl_benzoate	-0.0172414	0.896875
oxygenate_sesquiterpene	benzyl_benzoate	-0.0172414	0.896875
delta_cadinene	benzyl_benzoate	-0.0172414	0.896875
dihyidro_beta_agarofuran	benzyl_benzoate	-0.0245902	0.853333
X10._epi_gamma_eudesmol	benzyl_benzoate	-0.024591	0.853328
X4_epi_cis_dihydro_agarofuran	benzyl_benzoate	-0.0172414	0.896875
cubenol	benzyl_benzoate	-0.0172414	0.896875
beta_bourbonene	benzyl_benzoate	-0.0172414	0.896875
beta_bisabolene	benzyl_benzoate	-0.0172414	0.896875
aromadendrene	benzyl_benzoate	-0.0172414	0.896875
elemicine	benzyl_benzoate	-0.0172414	0.896875
asaricin	benzyl_benzoate	-0.0297414	0.823061
safrol	benzyl_benzoate	-0.0303817	0.819315
methyl_iso_eugenol	benzyl_benzoate	-0.0172414	0.896875
methyl_eugenol	benzyl_benzoate	-0.0241457	0.855956
benzyl_salicylate	benzyl_benzoate	1	0
Saureus	X2_tridecanone	-0.0181157	0.891676
linalool	X2_tridecanone	-0.0303227	0.81966
camphene	X2_tridecanone	-0.0302893	0.819855
camphor	X2_tridecanone	-0.0172414	0.896875
alpha_phellandrene	X2_tridecanone	-0.024595	0.853305
beta_phellandrene	X2_tridecanone	0.399779	0.00170691
ortho_cymene	X2_tridecanone	-0.0245918	0.853323
alpha_pinene	X2_tridecanone	0.149572	0.258191
beta_pinene	X2_tridecanone	-0.0706334	0.595002
sabinene	X2_tridecanone	-0.0245417	0.853619
gamma_cadinene	X2_tridecanone	-0.0245905	0.853331
myrcene	X2_tridecanone	-0.0342145	0.796979
delta_3_carene	X2_tridecanone	-0.0287092	0.829108
X1_8_cineole	X2_tridecanone	-0.0172414	0.896875
verbenone	X2_tridecanone	-0.0244538	0.854137
limonene	X2_tridecanone	-0.0491362	0.711703
cis_beta_ocimene	X2_tridecanone	-0.0172414	0.896875
trans_beta_ocimene	X2_tridecanone	-0.0245934	0.853314
germacreneA	X2_tridecanone	-0.0244964	0.853887
germacreneB	X2_tridecanone	-0.0301727	0.820538
germacreneD	X2_tridecanone	-0.0900743	0.497485
bicyclogermacrene	X2_tridecanone	-0.0810327	0.541788
X1_10_di_epi_cubenol	X2_tridecanone	-0.0172414	0.896875
bulnesol	X2_tridecanone	-0.0172414	0.896875
cis_beta_guaiene	X2_tridecanone	-0.0395334	0.766252
cis_cis_farnesol	X2_tridecanone	-0.0172414	0.896875
trans_cis_farnesol	X2_tridecanone	-0.0172414	0.896875
trans_beta_guaiene	X2_tridecanone	-0.0432719	0.744864
trans_caryophyllene	X2_tridecanone	-0.0978688	0.460859
caryophyllene_oxide	X2_tridecanone	-0.0609827	0.646362
spathulenol	X2_tridecanone	-0.087311	0.510823
valencene	X2_tridecanone	-0.0172414	0.896875
ar.curcumene	X2_tridecanone	-0.0172414	0.896875
junipene	X2_tridecanone	-0.0172414	0.896875
alpha_selinene	X2_tridecanone	-0.0234473	0.86008
beta_selinene	X2_tridecanone	-0.0172414	0.896875
guaiol	X2_tridecanone	-0.0172414	0.896875
beta_elemene	X2_tridecanone	-0.0302732	0.81995
trans_yophyllene	X2_tridecanone	-0.0172414	0.896875
gamma_muurolene	X2_tridecanone	-0.0340079	0.798179
alpha_humulene	X2_tridecanone	-0.0245946	0.853307
trans_nerolidol	X2_tridecanone	-0.0505143	0.703984
beta_copaen_4_alpha_ol	X2_tridecanone	-0.0343685	0.796085
beta_gurjunene	X2_tridecanone	-0.0172414	0.896875
oxygenate_sesquiterpene	X2_tridecanone	-0.0172414	0.896875
delta_cadinene	X2_tridecanone	-0.0172414	0.896875
dihyidro_beta_agarofuran	X2_tridecanone	-0.0245902	0.853333
X10._epi_gamma_eudesmol	X2_tridecanone	-0.024591	0.853328
X4_epi_cis_dihydro_agarofuran	X2_tridecanone	-0.0172414	0.896875
cubenol	X2_tridecanone	-0.0172414	0.896875
beta_bourbonene	X2_tridecanone	-0.0172414	0.896875
beta_bisabolene	X2_tridecanone	-0.0172414	0.896875
aromadendrene	X2_tridecanone	-0.0172414	0.896875
elemicine	X2_tridecanone	-0.0172414	0.896875
asaricin	X2_tridecanone	-0.0297414	0.823061
safrol	X2_tridecanone	-0.0303817	0.819315
methyl_iso_eugenol	X2_tridecanone	-0.0172414	0.896875
methyl_eugenol	X2_tridecanone	-0.0241457	0.855956
benzyl_salicylate	X2_tridecanone	-0.0172414	0.896875
benzyl_benzoate	X2_tridecanone	-0.0172414	0.896875
Saureus	X2_undecanone	-0.0181157	0.891676
linalool	X2_undecanone	-0.0303227	0.81966
camphene	X2_undecanone	-0.0302893	0.819855
camphor	X2_undecanone	-0.0172414	0.896875
alpha_phellandrene	X2_undecanone	-0.024595	0.853305
beta_phellandrene	X2_undecanone	0.399779	0.00170691
ortho_cymene	X2_undecanone	-0.0245918	0.853323
alpha_pinene	X2_undecanone	0.149572	0.258191
beta_pinene	X2_undecanone	-0.0706334	0.595002
sabinene	X2_undecanone	-0.0245417	0.853619
gamma_cadinene	X2_undecanone	-0.0245905	0.853331
myrcene	X2_undecanone	-0.0342145	0.796979
delta_3_carene	X2_undecanone	-0.0287092	0.829108
X1_8_cineole	X2_undecanone	-0.0172414	0.896875
verbenone	X2_undecanone	-0.0244538	0.854137
limonene	X2_undecanone	-0.0491362	0.711703
cis_beta_ocimene	X2_undecanone	-0.0172414	0.896875
trans_beta_ocimene	X2_undecanone	-0.0245934	0.853314
germacreneA	X2_undecanone	-0.0244964	0.853887
germacreneB	X2_undecanone	-0.0301727	0.820538
germacreneD	X2_undecanone	-0.0900743	0.497485
bicyclogermacrene	X2_undecanone	-0.0810327	0.541788
X1_10_di_epi_cubenol	X2_undecanone	-0.0172414	0.896875
bulnesol	X2_undecanone	-0.0172414	0.896875
cis_beta_guaiene	X2_undecanone	-0.0395334	0.766252
cis_cis_farnesol	X2_undecanone	-0.0172414	0.896875
trans_cis_farnesol	X2_undecanone	-0.0172414	0.896875
trans_beta_guaiene	X2_undecanone	-0.0432719	0.744864
trans_caryophyllene	X2_undecanone	-0.0978688	0.460859
caryophyllene_oxide	X2_undecanone	-0.0609827	0.646362
spathulenol	X2_undecanone	-0.087311	0.510823
valencene	X2_undecanone	-0.0172414	0.896875
ar.curcumene	X2_undecanone	-0.0172414	0.896875
junipene	X2_undecanone	-0.0172414	0.896875
alpha_selinene	X2_undecanone	-0.0234473	0.86008
beta_selinene	X2_undecanone	-0.0172414	0.896875
guaiol	X2_undecanone	-0.0172414	0.896875
beta_elemene	X2_undecanone	-0.0302732	0.81995
trans_yophyllene	X2_undecanone	-0.0172414	0.896875
gamma_muurolene	X2_undecanone	-0.0340079	0.798179
alpha_humulene	X2_undecanone	-0.0245946	0.853307
trans_nerolidol	X2_undecanone	-0.0505143	0.703984
beta_copaen_4_alpha_ol	X2_undecanone	-0.0343685	0.796085
beta_gurjunene	X2_undecanone	-0.0172414	0.896875
oxygenate_sesquiterpene	X2_undecanone	-0.0172414	0.896875
delta_cadinene	X2_undecanone	-0.0172414	0.896875
dihyidro_beta_agarofuran	X2_undecanone	-0.0245902	0.853333
X10._epi_gamma_eudesmol	X2_undecanone	-0.024591	0.853328
X4_epi_cis_dihydro_agarofuran	X2_undecanone	-0.0172414	0.896875
cubenol	X2_undecanone	-0.0172414	0.896875
beta_bourbonene	X2_undecanone	-0.0172414	0.896875
beta_bisabolene	X2_undecanone	-0.0172414	0.896875
aromadendrene	X2_undecanone	-0.0172414	0.896875
elemicine	X2_undecanone	-0.0172414	0.896875
asaricin	X2_undecanone	-0.0297414	0.823061
safrol	X2_undecanone	-0.0303817	0.819315
methyl_iso_eugenol	X2_undecanone	-0.0172414	0.896875
methyl_eugenol	X2_undecanone	-0.0241457	0.855956
benzyl_salicylate	X2_undecanone	-0.0172414	0.896875
benzyl_benzoate	X2_undecanone	-0.0172414	0.896875
X2_tridecanone	X2_undecanone	1	0

## Sheet: C xerosis
		Pearson´s r	p-value
Cxerosis	linalool	0.0221203	0.867925
Cxerosis	camphene	-0.183844	0.163369
linalool	camphene	-0.0532704	0.688635
Cxerosis	camphor	-0.0884306	0.505397
linalool	camphor	-0.0303227	0.81966
camphene	camphor	0.529481	1.61799e-05
Cxerosis	alpha_phellandrene	-0.175015	0.184903
linalool	alpha_phellandrene	-0.0432556	0.744957
camphene	alpha_phellandrene	-0.043208	0.745228
camphor	alpha_phellandrene	-0.024595	0.853305
Cxerosis	beta_phellandrene	0.148711	0.260972
linalool	beta_phellandrene	-0.0837226	0.528411
camphene	beta_phellandrene	-0.0836304	0.528866
camphor	beta_phellandrene	-0.0476043	0.720317
alpha_phellandrene	beta_phellandrene	0.18018	0.172071
Cxerosis	ortho_cymene	-0.0746601	0.574123
linalool	ortho_cymene	-0.04325	0.744989
camphene	ortho_cymene	-0.0432025	0.74526
camphor	ortho_cymene	-0.0245918	0.853323
alpha_phellandrene	ortho_cymene	0.477534	0.000131044
beta_phellandrene	ortho_cymene	-0.0678993	0.609368
Cxerosis	alpha_pinene	-0.0431226	0.745715
linalool	alpha_pinene	-0.0581618	0.661705
camphene	alpha_pinene	0.0722277	0.586695
camphor	alpha_pinene	-0.114217	0.389035
alpha_phellandrene	alpha_pinene	0.0270335	0.838945
beta_phellandrene	alpha_pinene	0.162032	0.220168
ortho_cymene	alpha_pinene	-0.16291	0.217643
Cxerosis	beta_pinene	-0.05494	0.679397
linalool	beta_pinene	-0.124224	0.34855
camphene	beta_pinene	-0.124087	0.349085
camphor	beta_pinene	-0.0706334	0.595002
alpha_phellandrene	beta_pinene	-0.100759	0.447661
beta_phellandrene	beta_pinene	-0.195023	0.13882
ortho_cymene	beta_pinene	-0.100746	0.447719
alpha_pinene	beta_pinene	0.355972	0.00565683
Cxerosis	sabinene	-0.0587041	0.658744
linalool	sabinene	-0.0431619	0.745491
camphene	sabinene	-0.0431144	0.745762
camphor	sabinene	-0.0245417	0.853619
alpha_phellandrene	sabinene	-0.0350089	0.792369
beta_phellandrene	sabinene	0.39734	0.00183259
ortho_cymene	sabinene	-0.0350044	0.792395
alpha_pinene	sabinene	-0.0455884	0.731706
beta_pinene	sabinene	-0.100541	0.44865
Cxerosis	gamma_cadinene	0.0649144	0.625221
linalool	gamma_cadinene	-0.0432477	0.745002
camphene	gamma_cadinene	-0.0432001	0.745273
camphor	gamma_cadinene	-0.0245905	0.853331
alpha_phellandrene	gamma_cadinene	-0.0350785	0.791965
beta_phellandrene	gamma_cadinene	-0.0678956	0.609388
ortho_cymene	gamma_cadinene	0.480667	0.000116596
alpha_pinene	gamma_cadinene	-0.162901	0.217668
beta_pinene	gamma_cadinene	-0.100741	0.447744
sabinene	gamma_cadinene	-0.0350025	0.792406
Cxerosis	myrcene	0.195398	0.138046
linalool	myrcene	-0.0601736	0.650748
camphene	myrcene	-0.0601074	0.651107
camphor	myrcene	-0.0342145	0.796979
alpha_phellandrene	myrcene	-0.0488072	0.71355
beta_phellandrene	myrcene	0.243042	0.0636228
ortho_cymene	myrcene	0.248243	0.0579883
alpha_pinene	myrcene	-0.0194997	0.883456
beta_pinene	myrcene	-0.140168	0.289668
sabinene	myrcene	0.277053	0.0336424
gamma_cadinene	myrcene	0.236923	0.0708056
Cxerosis	delta_3_carene	0.0808449	0.542728
linalool	delta_3_carene	-0.0504914	0.704112
camphene	delta_3_carene	-0.0504358	0.704422
camphor	delta_3_carene	-0.0287092	0.829108
alpha_phellandrene	delta_3_carene	-0.0409539	0.758104
beta_phellandrene	delta_3_carene	-0.0792676	0.550655
ortho_cymene	delta_3_carene	-0.0409487	0.758134
alpha_pinene	delta_3_carene	0.0445106	0.737819
beta_pinene	delta_3_carene	-0.117614	0.374989
sabinene	delta_3_carene	-0.0408652	0.758612
gamma_cadinene	delta_3_carene	-0.0409465	0.758147
myrcene	delta_3_carene	0.533726	1.34273e-05
Cxerosis	X1_8_cineole	0.214516	0.102779
linalool	X1_8_cineole	-0.0303227	0.81966
camphene	X1_8_cineole	-0.0302893	0.819855
camphor	X1_8_cineole	-0.0172414	0.896875
alpha_phellandrene	X1_8_cineole	-0.024595	0.853305
beta_phellandrene	X1_8_cineole	-0.0476043	0.720317
ortho_cymene	X1_8_cineole	-0.0245918	0.853323
alpha_pinene	X1_8_cineole	-0.114217	0.389035
beta_pinene	X1_8_cineole	-0.0706334	0.595002
sabinene	X1_8_cineole	-0.0245417	0.853619
gamma_cadinene	X1_8_cineole	-0.0245905	0.853331
myrcene	X1_8_cineole	-0.0342145	0.796979
delta_3_carene	X1_8_cineole	-0.0287092	0.829108
Cxerosis	verbenone	0.218901	0.0957719
linalool	verbenone	-0.0430074	0.746371
camphene	verbenone	-0.0429601	0.746641
camphor	verbenone	-0.0244538	0.854137
alpha_phellandrene	verbenone	-0.0348836	0.793096
beta_phellandrene	verbenone	-0.0675183	0.611382
ortho_cymene	verbenone	0.43328	0.000608445
alpha_pinene	verbenone	-0.161996	0.22027
beta_pinene	verbenone	-0.100181	0.450283
sabinene	verbenone	-0.034808	0.793534
gamma_cadinene	verbenone	0.415436	0.00106793
myrcene	verbenone	0.210834	0.108964
delta_3_carene	verbenone	-0.0407189	0.75945
X1_8_cineole	verbenone	0.773486	6.92779e-13
Cxerosis	limonene	-0.089264	0.501378
linalool	limonene	0.0387908	0.770522
camphene	limonene	0.0568801	0.668721
camphor	limonene	0.211097	0.108512
alpha_phellandrene	limonene	-0.0700931	0.597829
beta_phellandrene	limonene	-0.135668	0.305584
ortho_cymene	limonene	-0.0700842	0.597876
alpha_pinene	limonene	0.0718463	0.588677
beta_pinene	limonene	0.084744	0.523374
sabinene	limonene	-0.0699413	0.598624
gamma_cadinene	limonene	-0.0700803	0.597896
myrcene	limonene	-0.0975078	0.462522
delta_3_carene	limonene	-0.0818183	0.537864
X1_8_cineole	limonene	-0.0491362	0.711703
verbenone	limonene	-0.069691	0.599937
Cxerosis	cis_beta_ocimene	0.0125514	0.924831
linalool	cis_beta_ocimene	-0.0303227	0.81966
camphene	cis_beta_ocimene	-0.0302893	0.819855
camphor	cis_beta_ocimene	-0.0172414	0.896875
alpha_phellandrene	cis_beta_ocimene	-0.024595	0.853305
beta_phellandrene	cis_beta_ocimene	-0.0476043	0.720317
ortho_cymene	cis_beta_ocimene	-0.0245918	0.853323
alpha_pinene	cis_beta_ocimene	0.154651	0.242189
beta_pinene	cis_beta_ocimene	-0.0706334	0.595002
sabinene	cis_beta_ocimene	-0.0245417	0.853619
gamma_cadinene	cis_beta_ocimene	-0.0245905	0.853331
myrcene	cis_beta_ocimene	-0.0342145	0.796979
delta_3_carene	cis_beta_ocimene	-0.0287092	0.829108
X1_8_cineole	cis_beta_ocimene	-0.0172414	0.896875
verbenone	cis_beta_ocimene	-0.0244538	0.854137
limonene	cis_beta_ocimene	0.218522	0.0963633
Cxerosis	trans_beta_ocimene	0.0625406	0.63795
linalool	trans_beta_ocimene	-0.0432529	0.744973
camphene	trans_beta_ocimene	-0.0432053	0.745244
camphor	trans_beta_ocimene	-0.0245934	0.853314
alpha_phellandrene	trans_beta_ocimene	-0.0350827	0.791941
beta_phellandrene	trans_beta_ocimene	-0.0679037	0.609345
ortho_cymene	trans_beta_ocimene	-0.0350782	0.791967
alpha_pinene	trans_beta_ocimene	-0.162921	0.217612
beta_pinene	trans_beta_ocimene	-0.100753	0.447689
sabinene	trans_beta_ocimene	-0.0350067	0.792382
gamma_cadinene	trans_beta_ocimene	-0.0350763	0.791978
myrcene	trans_beta_ocimene	-0.0488042	0.713567
delta_3_carene	trans_beta_ocimene	-0.0409514	0.758119
X1_8_cineole	trans_beta_ocimene	-0.0245934	0.853314
verbenone	trans_beta_ocimene	-0.0348814	0.793108
limonene	trans_beta_ocimene	0.25719	0.049245
cis_beta_ocimene	trans_beta_ocimene	-0.0245934	0.853314
Cxerosis	germacreneA	-0.0693301	0.601831
linalool	germacreneA	0.375306	0.00340068
camphene	germacreneA	-0.0430347	0.746216
camphor	germacreneA	-0.0244964	0.853887
alpha_phellandrene	germacreneA	-0.0349442	0.792744
beta_phellandrene	germacreneA	-0.0676357	0.610761
ortho_cymene	germacreneA	-0.0349398	0.79277
alpha_pinene	germacreneA	-0.162278	0.219459
beta_pinene	germacreneA	0.111757	0.399398
sabinene	germacreneA	-0.0348685	0.793183
gamma_cadinene	germacreneA	-0.0349379	0.792781
myrcene	germacreneA	-0.0486115	0.714649
delta_3_carene	germacreneA	-0.0407897	0.759045
X1_8_cineole	germacreneA	-0.0244964	0.853887
verbenone	germacreneA	-0.0347437	0.793907
limonene	germacreneA	-0.0698121	0.599302
cis_beta_ocimene	germacreneA	-0.0244964	0.853887
trans_beta_ocimene	germacreneA	-0.0349421	0.792757
Cxerosis	germacreneB	-0.142406	0.281959
linalool	germacreneB	-0.0530652	0.689774
camphene	germacreneB	-0.0530068	0.690098
camphor	germacreneB	-0.0301727	0.820538
alpha_phellandrene	germacreneB	0.308801	0.017328
beta_phellandrene	germacreneB	0.0883904	0.505591
ortho_cymene	germacreneB	-0.0430361	0.746208
alpha_pinene	germacreneB	0.0523821	0.693569
beta_pinene	germacreneB	0.0504409	0.704394
sabinene	germacreneB	-0.0429483	0.746708
gamma_cadinene	germacreneB	-0.0430337	0.746221
myrcene	germacreneB	-0.0598759	0.652365
delta_3_carene	germacreneB	-0.0502416	0.705509
X1_8_cineole	germacreneB	-0.0301727	0.820538
verbenone	germacreneB	-0.0427946	0.747584
limonene	germacreneB	-0.085989	0.517267
cis_beta_ocimene	germacreneB	-0.0301727	0.820538
trans_beta_ocimene	germacreneB	-0.0430389	0.746192
germacreneA	germacreneB	-0.042869	0.74716
Cxerosis	germacreneD	0.138449	0.29568
linalool	germacreneD	-0.158415	0.230777
camphene	germacreneD	-0.158241	0.231297
camphor	germacreneD	-0.0900743	0.497485
alpha_phellandrene	germacreneD	0.0282071	0.832053
beta_phellandrene	germacreneD	0.0903264	0.496278
ortho_cymene	germacreneD	0.0354723	0.789683
alpha_pinene	germacreneD	-0.240246	0.0668281
beta_pinene	germacreneD	-0.0945542	0.476252
sabinene	germacreneD	-0.128213	0.333166
gamma_cadinene	germacreneD	0.171922	0.192908
myrcene	germacreneD	0.0556067	0.675722
delta_3_carene	germacreneD	-0.0651859	0.623772
X1_8_cineole	germacreneD	-0.0900743	0.497485
verbenone	germacreneD	0.0153946	0.907871
limonene	germacreneD	-0.117147	0.376902
cis_beta_ocimene	germacreneD	0.0878769	0.508077
trans_beta_ocimene	germacreneD	0.244385	0.062127
germacreneA	germacreneD	0.00589097	0.96468
germacreneB	germacreneD	-0.0491819	0.711446
Cxerosis	bicyclogermacrene	-0.187748	0.154458
linalool	bicyclogermacrene	0.0118303	0.929138
camphene	bicyclogermacrene	-0.142357	0.282126
camphor	bicyclogermacrene	-0.0810327	0.541788
alpha_phellandrene	bicyclogermacrene	0.017159	0.897365
beta_phellandrene	bicyclogermacrene	0.0923443	0.486666
ortho_cymene	bicyclogermacrene	0.0136215	0.918443
alpha_pinene	bicyclogermacrene	-0.252546	0.053638
beta_pinene	bicyclogermacrene	-0.102501	0.439808
sabinene	bicyclogermacrene	0.321218	0.0131141
gamma_cadinene	bicyclogermacrene	-0.115573	0.383393
myrcene	bicyclogermacrene	-0.0336336	0.800354
delta_3_carene	bicyclogermacrene	0.131474	0.320914
X1_8_cineole	bicyclogermacrene	-0.0810327	0.541788
verbenone	bicyclogermacrene	-0.114931	0.386059
limonene	bicyclogermacrene	-0.230935	0.078448
cis_beta_ocimene	bicyclogermacrene	-0.0810327	0.541788
trans_beta_ocimene	bicyclogermacrene	0.137064	0.300586
germacreneA	bicyclogermacrene	0.255186	0.0511037
germacreneB	bicyclogermacrene	-0.141808	0.284003
germacreneD	bicyclogermacrene	0.27273	0.0366309
Cxerosis	X1_10_di_epi_cubenol	0.0125514	0.924831
linalool	X1_10_di_epi_cubenol	-0.0303227	0.81966
camphene	X1_10_di_epi_cubenol	-0.0302893	0.819855
camphor	X1_10_di_epi_cubenol	-0.0172414	0.896875
alpha_phellandrene	X1_10_di_epi_cubenol	-0.024595	0.853305
beta_phellandrene	X1_10_di_epi_cubenol	-0.0476043	0.720317
ortho_cymene	X1_10_di_epi_cubenol	-0.0245918	0.853323
alpha_pinene	X1_10_di_epi_cubenol	-0.114217	0.389035
beta_pinene	X1_10_di_epi_cubenol	-0.0706334	0.595002
sabinene	X1_10_di_epi_cubenol	-0.0245417	0.853619
gamma_cadinene	X1_10_di_epi_cubenol	0.715871	1.85572e-10
myrcene	X1_10_di_epi_cubenol	-0.0342145	0.796979
delta_3_carene	X1_10_di_epi_cubenol	-0.0287092	0.829108
X1_8_cineole	X1_10_di_epi_cubenol	-0.0172414	0.896875
verbenone	X1_10_di_epi_cubenol	-0.0244538	0.854137
limonene	X1_10_di_epi_cubenol	-0.0491362	0.711703
cis_beta_ocimene	X1_10_di_epi_cubenol	-0.0172414	0.896875
trans_beta_ocimene	X1_10_di_epi_cubenol	-0.0245934	0.853314
germacreneA	X1_10_di_epi_cubenol	-0.0244964	0.853887
germacreneB	X1_10_di_epi_cubenol	-0.0301727	0.820538
germacreneD	X1_10_di_epi_cubenol	0.105955	0.424466
bicyclogermacrene	X1_10_di_epi_cubenol	-0.0810327	0.541788
Cxerosis	bulnesol	0.214516	0.102779
linalool	bulnesol	-0.0303227	0.81966
camphene	bulnesol	-0.0302893	0.819855
camphor	bulnesol	-0.0172414	0.896875
alpha_phellandrene	bulnesol	-0.024595	0.853305
beta_phellandrene	bulnesol	-0.0476043	0.720317
ortho_cymene	bulnesol	-0.0245918	0.853323
alpha_pinene	bulnesol	-0.114217	0.389035
beta_pinene	bulnesol	-0.0706334	0.595002
sabinene	bulnesol	-0.0245417	0.853619
gamma_cadinene	bulnesol	-0.0245905	0.853331
myrcene	bulnesol	-0.0342145	0.796979
delta_3_carene	bulnesol	-0.0287092	0.829108
X1_8_cineole	bulnesol	-0.0172414	0.896875
verbenone	bulnesol	-0.0244538	0.854137
limonene	bulnesol	0.416293	0.00104018
cis_beta_ocimene	bulnesol	-0.0172414	0.896875
trans_beta_ocimene	bulnesol	0.690707	1.41442e-09
germacreneA	bulnesol	-0.0244964	0.853887
germacreneB	bulnesol	-0.0301727	0.820538
germacreneD	bulnesol	0.112602	0.395817
bicyclogermacrene	bulnesol	-0.0810327	0.541788
X1_10_di_epi_cubenol	bulnesol	-0.0172414	0.896875
Cxerosis	cis_beta_guaiene	0.0792717	0.550634
linalool	cis_beta_guaiene	-0.069528	0.600792
camphene	cis_beta_guaiene	-0.0694515	0.601194
camphor	cis_beta_guaiene	-0.0395334	0.766252
alpha_phellandrene	cis_beta_guaiene	-0.0563947	0.671387
beta_phellandrene	cis_beta_guaiene	-0.109154	0.410537
ortho_cymene	cis_beta_guaiene	0.272797	0.0365832
alpha_pinene	cis_beta_guaiene	-0.0312961	0.813973
beta_pinene	cis_beta_guaiene	0.141904	0.283676
sabinene	cis_beta_guaiene	-0.0562725	0.672058
gamma_cadinene	cis_beta_guaiene	0.260252	0.0465128
myrcene	cis_beta_guaiene	0.103917	0.433482
delta_3_carene	cis_beta_guaiene	-0.0658284	0.620348
X1_8_cineole	cis_beta_guaiene	-0.0395334	0.766252
verbenone	cis_beta_guaiene	0.231352	0.0778946
limonene	cis_beta_guaiene	-0.112666	0.395549
cis_beta_ocimene	cis_beta_guaiene	-0.0395334	0.766252
trans_beta_ocimene	cis_beta_guaiene	-0.0563912	0.671406
germacreneA	cis_beta_guaiene	-0.0561686	0.67263
germacreneB	cis_beta_guaiene	-0.069184	0.602599
germacreneD	cis_beta_guaiene	0.241107	0.0658277
bicyclogermacrene	cis_beta_guaiene	-0.185803	0.158852
X1_10_di_epi_cubenol	cis_beta_guaiene	-0.0395334	0.766252
bulnesol	cis_beta_guaiene	-0.0395334	0.766252
Cxerosis	cis_cis_farnesol	0.0798728	0.547607
linalool	cis_cis_farnesol	-0.0303227	0.81966
camphene	cis_cis_farnesol	-0.0302893	0.819855
camphor	cis_cis_farnesol	-0.0172414	0.896875
alpha_phellandrene	cis_cis_farnesol	-0.024595	0.853305
beta_phellandrene	cis_cis_farnesol	-0.0476043	0.720317
ortho_cymene	cis_cis_farnesol	-0.0245918	0.853323
alpha_pinene	cis_cis_farnesol	-0.114217	0.389035
beta_pinene	cis_cis_farnesol	-0.0706334	0.595002
sabinene	cis_cis_farnesol	-0.0245417	0.853619
gamma_cadinene	cis_cis_farnesol	-0.0245905	0.853331
myrcene	cis_cis_farnesol	-0.0342145	0.796979
delta_3_carene	cis_cis_farnesol	-0.0287092	0.829108
X1_8_cineole	cis_cis_farnesol	-0.0172414	0.896875
verbenone	cis_cis_farnesol	-0.0244538	0.854137
limonene	cis_cis_farnesol	-0.0491362	0.711703
cis_beta_ocimene	cis_cis_farnesol	-0.0172414	0.896875
trans_beta_ocimene	cis_cis_farnesol	-0.0245934	0.853314
germacreneA	cis_cis_farnesol	-0.0244964	0.853887
germacreneB	cis_cis_farnesol	-0.0301727	0.820538
germacreneD	cis_cis_farnesol	-0.0900743	0.497485
bicyclogermacrene	cis_cis_farnesol	-0.0810327	0.541788
X1_10_di_epi_cubenol	cis_cis_farnesol	-0.0172414	0.896875
bulnesol	cis_cis_farnesol	-0.0172414	0.896875
cis_beta_guaiene	cis_cis_farnesol	-0.0395334	0.766252
Cxerosis	trans_cis_farnesol	0.0798728	0.547607
linalool	trans_cis_farnesol	-0.0303227	0.81966
camphene	trans_cis_farnesol	-0.0302893	0.819855
camphor	trans_cis_farnesol	-0.0172414	0.896875
alpha_phellandrene	trans_cis_farnesol	-0.024595	0.853305
beta_phellandrene	trans_cis_farnesol	-0.0476043	0.720317
ortho_cymene	trans_cis_farnesol	-0.0245918	0.853323
alpha_pinene	trans_cis_farnesol	-0.114217	0.389035
beta_pinene	trans_cis_farnesol	-0.0706334	0.595002
sabinene	trans_cis_farnesol	-0.0245417	0.853619
gamma_cadinene	trans_cis_farnesol	-0.0245905	0.853331
myrcene	trans_cis_farnesol	-0.0342145	0.796979
delta_3_carene	trans_cis_farnesol	-0.0287092	0.829108
X1_8_cineole	trans_cis_farnesol	-0.0172414	0.896875
verbenone	trans_cis_farnesol	-0.0244538	0.854137
limonene	trans_cis_farnesol	-0.0491362	0.711703
cis_beta_ocimene	trans_cis_farnesol	-0.0172414	0.896875
trans_beta_ocimene	trans_cis_farnesol	-0.0245934	0.853314
germacreneA	trans_cis_farnesol	-0.0244964	0.853887
germacreneB	trans_cis_farnesol	-0.0301727	0.820538
germacreneD	trans_cis_farnesol	-0.0900743	0.497485
bicyclogermacrene	trans_cis_farnesol	-0.0810327	0.541788
X1_10_di_epi_cubenol	trans_cis_farnesol	-0.0172414	0.896875
bulnesol	trans_cis_farnesol	-0.0172414	0.896875
cis_beta_guaiene	trans_cis_farnesol	-0.0395334	0.766252
cis_cis_farnesol	trans_cis_farnesol	1	0
Cxerosis	trans_beta_guaiene	0.0222164	0.867357
linalool	trans_beta_guaiene	-0.076103	0.566724
camphene	trans_beta_guaiene	-0.0760193	0.567152
camphor	trans_beta_guaiene	-0.0432719	0.744864
alpha_phellandrene	trans_beta_guaiene	0.218216	0.0968416
beta_phellandrene	trans_beta_guaiene	0.0471245	0.723022
ortho_cymene	trans_beta_guaiene	0.210733	0.109136
alpha_pinene	trans_beta_guaiene	-0.205031	0.119286
beta_pinene	trans_beta_guaiene	-0.0966604	0.466439
sabinene	trans_beta_guaiene	-0.061594	0.643056
gamma_cadinene	trans_beta_guaiene	0.276123	0.0342675
myrcene	trans_beta_guaiene	0.0764029	0.565192
delta_3_carene	trans_beta_guaiene	-0.0720535	0.5876
X1_8_cineole	trans_beta_guaiene	-0.0432719	0.744864
verbenone	trans_beta_guaiene	-0.0613735	0.644247
limonene	trans_beta_guaiene	-0.12332	0.352095
cis_beta_ocimene	trans_beta_guaiene	-0.0432719	0.744864
trans_beta_ocimene	trans_beta_guaiene	-0.0617239	0.642355
germacreneA	trans_beta_guaiene	-0.0614802	0.643671
germacreneB	trans_beta_guaiene	0.17261	0.191107
germacreneD	trans_beta_guaiene	-0.0204715	0.877692
bicyclogermacrene	trans_beta_guaiene	-0.132816	0.315957
X1_10_di_epi_cubenol	trans_beta_guaiene	0.42085	0.000903263
bulnesol	trans_beta_guaiene	-0.0432719	0.744864
cis_beta_guaiene	trans_beta_guaiene	-0.0992197	0.454664
cis_cis_farnesol	trans_beta_guaiene	-0.0432719	0.744864
trans_cis_farnesol	trans_beta_guaiene	-0.0432719	0.744864
Cxerosis	trans_caryophyllene	-0.0898533	0.498546
linalool	trans_caryophyllene	0.139356	0.292499
camphene	trans_caryophyllene	-0.171934	0.192877
camphor	trans_caryophyllene	-0.0978688	0.460859
alpha_phellandrene	trans_caryophyllene	0.00440074	0.973611
beta_phellandrene	trans_caryophyllene	-0.270221	0.038464
ortho_cymene	trans_caryophyllene	0.18984	0.149833
alpha_pinene	trans_caryophyllene	-0.242063	0.0647302
beta_pinene	trans_caryophyllene	-0.103853	0.433767
sabinene	trans_caryophyllene	-0.139308	0.292665
gamma_cadinene	trans_caryophyllene	0.198034	0.132706
myrcene	trans_caryophyllene	-0.0893562	0.500934
delta_3_carene	trans_caryophyllene	0.0780817	0.556651
X1_8_cineole	trans_caryophyllene	-0.0978688	0.460859
verbenone	trans_caryophyllene	0.0264537	0.842355
limonene	trans_caryophyllene	-0.167367	0.205146
cis_beta_ocimene	trans_caryophyllene	0.158258	0.231245
trans_beta_ocimene	trans_caryophyllene	0.0732443	0.581425
germacreneA	trans_caryophyllene	0.117676	0.374737
germacreneB	trans_caryophyllene	0.0141119	0.915518
germacreneD	trans_caryophyllene	0.366587	0.00429417
bicyclogermacrene	trans_caryophyllene	0.30364	0.0193927
X1_10_di_epi_cubenol	trans_caryophyllene	0.115837	0.382298
bulnesol	trans_caryophyllene	-0.0978688	0.460859
cis_beta_guaiene	trans_caryophyllene	0.242832	0.0638594
cis_cis_farnesol	trans_caryophyllene	-0.0978688	0.460859
trans_cis_farnesol	trans_caryophyllene	-0.0978688	0.460859
trans_beta_guaiene	trans_caryophyllene	0.0153779	0.90797
Cxerosis	caryophyllene_oxide	-0.0731049	0.582146
linalool	caryophyllene_oxide	-0.107251	0.41879
camphene	caryophyllene_oxide	-0.107133	0.419305
camphor	caryophyllene_oxide	-0.0609827	0.646362
alpha_phellandrene	caryophyllene_oxide	-0.0869923	0.512373
beta_phellandrene	caryophyllene_oxide	-0.168377	0.202388
ortho_cymene	caryophyllene_oxide	-0.0869812	0.512427
alpha_pinene	caryophyllene_oxide	-0.20269	0.123655
beta_pinene	caryophyllene_oxide	-0.0854851	0.519735
sabinene	caryophyllene_oxide	-0.0868039	0.51329
gamma_cadinene	caryophyllene_oxide	-0.0869765	0.51245
myrcene	caryophyllene_oxide	-0.121017	0.361233
delta_3_carene	caryophyllene_oxide	0.122749	0.354346
X1_8_cineole	caryophyllene_oxide	-0.0609827	0.646362
verbenone	caryophyllene_oxide	-0.0864932	0.514805
limonene	caryophyllene_oxide	-0.173795	0.188032
cis_beta_ocimene	caryophyllene_oxide	-0.0609827	0.646362
trans_beta_ocimene	caryophyllene_oxide	-0.0869869	0.512399
germacreneA	caryophyllene_oxide	-0.0866436	0.514072
germacreneB	caryophyllene_oxide	0.113159	0.393473
germacreneD	caryophyllene_oxide	-0.0421079	0.751504
bicyclogermacrene	caryophyllene_oxide	0.0695413	0.600722
X1_10_di_epi_cubenol	caryophyllene_oxide	-0.0609827	0.646362
bulnesol	caryophyllene_oxide	-0.0609827	0.646362
cis_beta_guaiene	caryophyllene_oxide	-0.00630442	0.962203
cis_cis_farnesol	caryophyllene_oxide	-0.0609827	0.646362
trans_cis_farnesol	caryophyllene_oxide	-0.0609827	0.646362
trans_beta_guaiene	caryophyllene_oxide	-0.0540171	0.684498
trans_caryophyllene	caryophyllene_oxide	0.507902	4.02065e-05
Cxerosis	spathulenol	-0.0348452	0.793318
linalool	spathulenol	-0.0464697	0.72672
camphene	spathulenol	-0.153386	0.246108
camphor	spathulenol	-0.087311	0.510823
alpha_phellandrene	spathulenol	-0.12455	0.347278
beta_phellandrene	spathulenol	-0.0961775	0.468679
ortho_cymene	spathulenol	-0.124534	0.34734
alpha_pinene	spathulenol	-0.439233	0.000500832
beta_pinene	spathulenol	-0.307203	0.0179462
sabinene	spathulenol	0.191135	0.147022
gamma_cadinene	spathulenol	-0.124527	0.347366
myrcene	spathulenol	-0.0908123	0.493954
delta_3_carene	spathulenol	0.121352	0.359893
X1_8_cineole	spathulenol	0.292301	0.0246734
verbenone	spathulenol	0.173938	0.187662
limonene	spathulenol	-0.248827	0.0573813
cis_beta_ocimene	spathulenol	-0.087311	0.510823
trans_beta_ocimene	spathulenol	0.0100699	0.939662
germacreneA	spathulenol	0.031693	0.811656
germacreneB	spathulenol	0.0324863	0.807032
germacreneD	spathulenol	0.0210502	0.874262
bicyclogermacrene	spathulenol	0.302604	0.0198314
X1_10_di_epi_cubenol	spathulenol	-0.087311	0.510823
bulnesol	spathulenol	-0.087311	0.510823
cis_beta_guaiene	spathulenol	-0.041068	0.757451
cis_cis_farnesol	spathulenol	-0.087311	0.510823
trans_cis_farnesol	spathulenol	-0.087311	0.510823
trans_beta_guaiene	spathulenol	0.0393915	0.767068
trans_caryophyllene	spathulenol	0.199944	0.128935
caryophyllene_oxide	spathulenol	0.422116	0.000868234
Cxerosis	valencene	0.0798728	0.547607
linalool	valencene	-0.0303227	0.81966
camphene	valencene	-0.0302893	0.819855
camphor	valencene	-0.0172414	0.896875
alpha_phellandrene	valencene	-0.024595	0.853305
beta_phellandrene	valencene	-0.0476043	0.720317
ortho_cymene	valencene	-0.0245918	0.853323
alpha_pinene	valencene	0.0581237	0.661912
beta_pinene	valencene	-0.0706334	0.595002
sabinene	valencene	-0.0245417	0.853619
gamma_cadinene	valencene	-0.0245905	0.853331
myrcene	valencene	-0.0342145	0.796979
delta_3_carene	valencene	-0.0287092	0.829108
X1_8_cineole	valencene	-0.0172414	0.896875
verbenone	valencene	-0.0244538	0.854137
limonene	valencene	-0.0491362	0.711703
cis_beta_ocimene	valencene	-0.0172414	0.896875
trans_beta_ocimene	valencene	-0.0245934	0.853314
germacreneA	valencene	-0.0244964	0.853887
germacreneB	valencene	-0.0301727	0.820538
germacreneD	valencene	-0.0900743	0.497485
bicyclogermacrene	valencene	-0.0810327	0.541788
X1_10_di_epi_cubenol	valencene	-0.0172414	0.896875
bulnesol	valencene	-0.0172414	0.896875
cis_beta_guaiene	valencene	-0.0395334	0.766252
cis_cis_farnesol	valencene	-0.0172414	0.896875
trans_cis_farnesol	valencene	-0.0172414	0.896875
trans_beta_guaiene	valencene	-0.0432719	0.744864
trans_caryophyllene	valencene	-0.0978688	0.460859
caryophyllene_oxide	valencene	-0.0609827	0.646362
spathulenol	valencene	0.190827	0.147688
Cxerosis	ar.curcumene	0.0125514	0.924831
linalool	ar.curcumene	-0.0303227	0.81966
camphene	ar.curcumene	-0.0302893	0.819855
camphor	ar.curcumene	-0.0172414	0.896875
alpha_phellandrene	ar.curcumene	-0.024595	0.853305
beta_phellandrene	ar.curcumene	-0.0476043	0.720317
ortho_cymene	ar.curcumene	-0.0245918	0.853323
alpha_pinene	ar.curcumene	-0.114217	0.389035
beta_pinene	ar.curcumene	-0.0706334	0.595002
sabinene	ar.curcumene	-0.0245417	0.853619
gamma_cadinene	ar.curcumene	-0.0245905	0.853331
myrcene	ar.curcumene	-0.0342145	0.796979
delta_3_carene	ar.curcumene	-0.0287092	0.829108
X1_8_cineole	ar.curcumene	-0.0172414	0.896875
verbenone	ar.curcumene	-0.0244538	0.854137
limonene	ar.curcumene	-0.0491362	0.711703
cis_beta_ocimene	ar.curcumene	-0.0172414	0.896875
trans_beta_ocimene	ar.curcumene	-0.0245934	0.853314
germacreneA	ar.curcumene	-0.0244964	0.853887
germacreneB	ar.curcumene	-0.0301727	0.820538
germacreneD	ar.curcumene	-0.0900743	0.497485
bicyclogermacrene	ar.curcumene	-0.0810327	0.541788
X1_10_di_epi_cubenol	ar.curcumene	-0.0172414	0.896875
bulnesol	ar.curcumene	-0.0172414	0.896875
cis_beta_guaiene	ar.curcumene	-0.0395334	0.766252
cis_cis_farnesol	ar.curcumene	-0.0172414	0.896875
trans_cis_farnesol	ar.curcumene	-0.0172414	0.896875
trans_beta_guaiene	ar.curcumene	-0.0432719	0.744864
trans_caryophyllene	ar.curcumene	0.103122	0.437027
caryophyllene_oxide	ar.curcumene	0.323761	0.0123697
spathulenol	ar.curcumene	0.288631	0.0266233
valencene	ar.curcumene	-0.0172414	0.896875
Cxerosis	junipene	0.0125514	0.924831
linalool	junipene	-0.0303227	0.81966
camphene	junipene	-0.0302893	0.819855
camphor	junipene	-0.0172414	0.896875
alpha_phellandrene	junipene	-0.024595	0.853305
beta_phellandrene	junipene	-0.0476043	0.720317
ortho_cymene	junipene	-0.0245918	0.853323
alpha_pinene	junipene	-0.114217	0.389035
beta_pinene	junipene	-0.0706334	0.595002
sabinene	junipene	-0.0245417	0.853619
gamma_cadinene	junipene	-0.0245905	0.853331
myrcene	junipene	-0.0342145	0.796979
delta_3_carene	junipene	-0.0287092	0.829108
X1_8_cineole	junipene	-0.0172414	0.896875
verbenone	junipene	-0.0244538	0.854137
limonene	junipene	-0.0491362	0.711703
cis_beta_ocimene	junipene	-0.0172414	0.896875
trans_beta_ocimene	junipene	-0.0245934	0.853314
germacreneA	junipene	-0.0244964	0.853887
germacreneB	junipene	-0.0301727	0.820538
germacreneD	junipene	-0.0900743	0.497485
bicyclogermacrene	junipene	-0.0810327	0.541788
X1_10_di_epi_cubenol	junipene	-0.0172414	0.896875
bulnesol	junipene	-0.0172414	0.896875
cis_beta_guaiene	junipene	-0.0395334	0.766252
cis_cis_farnesol	junipene	-0.0172414	0.896875
trans_cis_farnesol	junipene	-0.0172414	0.896875
trans_beta_guaiene	junipene	-0.0432719	0.744864
trans_caryophyllene	junipene	0.103122	0.437027
caryophyllene_oxide	junipene	0.323761	0.0123697
spathulenol	junipene	0.288631	0.0266233
valencene	junipene	-0.0172414	0.896875
ar.curcumene	junipene	1	0
Cxerosis	alpha_selinene	-0.137526	0.298943
linalool	alpha_selinene	0.250897	0.0552726
camphene	alpha_selinene	-0.0411917	0.756742
camphor	alpha_selinene	-0.0234473	0.86008
alpha_phellandrene	alpha_selinene	-0.0334477	0.801435
beta_phellandrene	alpha_selinene	-0.0647391	0.626157
ortho_cymene	alpha_selinene	-0.0334434	0.80146
alpha_pinene	alpha_selinene	-0.0463837	0.727206
beta_pinene	alpha_selinene	-0.0960573	0.469238
sabinene	alpha_selinene	-0.0333753	0.801857
gamma_cadinene	alpha_selinene	-0.0334416	0.801471
myrcene	alpha_selinene	-0.0465297	0.726381
delta_3_carene	alpha_selinene	-0.0390429	0.769072
X1_8_cineole	alpha_selinene	-0.0234473	0.86008
verbenone	alpha_selinene	-0.0332558	0.802551
limonene	alpha_selinene	0.0287586	0.828819
cis_beta_ocimene	alpha_selinene	-0.0234473	0.86008
trans_beta_ocimene	alpha_selinene	-0.0334456	0.801447
germacreneA	alpha_selinene	-0.0333136	0.802215
germacreneB	alpha_selinene	-0.0410331	0.757651
germacreneD	alpha_selinene	-0.122496	0.355349
bicyclogermacrene	alpha_selinene	-0.1102	0.406039
X1_10_di_epi_cubenol	alpha_selinene	-0.0234473	0.86008
bulnesol	alpha_selinene	-0.0234473	0.86008
cis_beta_guaiene	alpha_selinene	-0.0537631	0.685905
cis_cis_farnesol	alpha_selinene	-0.0234473	0.86008
trans_cis_farnesol	alpha_selinene	-0.0234473	0.86008
trans_beta_guaiene	alpha_selinene	-0.0588473	0.657963
trans_caryophyllene	alpha_selinene	0.191187	0.146909
caryophyllene_oxide	alpha_selinene	0.168558	0.201895
spathulenol	alpha_selinene	0.157691	0.232943
valencene	alpha_selinene	-0.0234473	0.86008
ar.curcumene	alpha_selinene	-0.0234473	0.86008
junipene	alpha_selinene	-0.0234473	0.86008
Cxerosis	beta_selinene	-0.189413	0.150769
linalool	beta_selinene	-0.0303227	0.81966
camphene	beta_selinene	-0.0302893	0.819855
camphor	beta_selinene	-0.0172414	0.896875
alpha_phellandrene	beta_selinene	0.707381	3.77058e-10
beta_phellandrene	beta_selinene	-0.0476043	0.720317
ortho_cymene	beta_selinene	0.687798	1.76538e-09
alpha_pinene	beta_selinene	-0.114217	0.389035
beta_pinene	beta_selinene	-0.0706334	0.595002
sabinene	beta_selinene	-0.0245417	0.853619
gamma_cadinene	beta_selinene	-0.0245905	0.853331
myrcene	beta_selinene	-0.0342145	0.796979
delta_3_carene	beta_selinene	-0.0287092	0.829108
X1_8_cineole	beta_selinene	-0.0172414	0.896875
verbenone	beta_selinene	-0.0244538	0.854137
limonene	beta_selinene	-0.0491362	0.711703
cis_beta_ocimene	beta_selinene	-0.0172414	0.896875
trans_beta_ocimene	beta_selinene	-0.0245934	0.853314
germacreneA	beta_selinene	-0.0244964	0.853887
germacreneB	beta_selinene	-0.0301727	0.820538
germacreneD	beta_selinene	-0.0900743	0.497485
bicyclogermacrene	beta_selinene	0.103456	0.435535
X1_10_di_epi_cubenol	beta_selinene	-0.0172414	0.896875
bulnesol	beta_selinene	-0.0172414	0.896875
cis_beta_guaiene	beta_selinene	-0.0395334	0.766252
cis_cis_farnesol	beta_selinene	-0.0172414	0.896875
trans_cis_farnesol	beta_selinene	-0.0172414	0.896875
trans_beta_guaiene	beta_selinene	0.345771	0.00731005
trans_caryophyllene	beta_selinene	0.102266	0.440861
caryophyllene_oxide	beta_selinene	-0.0609827	0.646362
spathulenol	beta_selinene	-0.087311	0.510823
valencene	beta_selinene	-0.0172414	0.896875
ar.curcumene	beta_selinene	-0.0172414	0.896875
junipene	beta_selinene	-0.0172414	0.896875
alpha_selinene	beta_selinene	-0.0234473	0.86008
Cxerosis	guaiol	-0.0884306	0.505397
linalool	guaiol	-0.0303227	0.81966
camphene	guaiol	-0.0302893	0.819855
camphor	guaiol	-0.0172414	0.896875
alpha_phellandrene	guaiol	-0.024595	0.853305
beta_phellandrene	guaiol	-0.0476043	0.720317
ortho_cymene	guaiol	-0.0245918	0.853323
alpha_pinene	guaiol	0.112072	0.398061
beta_pinene	guaiol	0.217484	0.0979942
sabinene	guaiol	-0.0245417	0.853619
gamma_cadinene	guaiol	-0.0245905	0.853331
myrcene	guaiol	-0.0342145	0.796979
delta_3_carene	guaiol	-0.0287092	0.829108
X1_8_cineole	guaiol	-0.0172414	0.896875
verbenone	guaiol	-0.0244538	0.854137
limonene	guaiol	-0.0491362	0.711703
cis_beta_ocimene	guaiol	-0.0172414	0.896875
trans_beta_ocimene	guaiol	-0.0245934	0.853314
germacreneA	guaiol	-0.0244964	0.853887
germacreneB	guaiol	-0.0301727	0.820538
germacreneD	guaiol	0.142144	0.282851
bicyclogermacrene	guaiol	0.0850377	0.52193
X1_10_di_epi_cubenol	guaiol	-0.0172414	0.896875
bulnesol	guaiol	-0.0172414	0.896875
cis_beta_guaiene	guaiol	-0.0395334	0.766252
cis_cis_farnesol	guaiol	-0.0172414	0.896875
trans_cis_farnesol	guaiol	-0.0172414	0.896875
trans_beta_guaiene	guaiol	-0.0432719	0.744864
trans_caryophyllene	guaiol	0.143799	0.277228
caryophyllene_oxide	guaiol	-0.0609827	0.646362
spathulenol	guaiol	-0.087311	0.510823
valencene	guaiol	-0.0172414	0.896875
ar.curcumene	guaiol	-0.0172414	0.896875
junipene	guaiol	-0.0172414	0.896875
alpha_selinene	guaiol	-0.0234473	0.86008
beta_selinene	guaiol	-0.0172414	0.896875
Cxerosis	beta_elemene	-0.0659762	0.619562
linalool	beta_elemene	0.254399	0.0518491
camphene	beta_elemene	-0.0531834	0.689118
camphor	beta_elemene	-0.0302732	0.81995
alpha_phellandrene	beta_elemene	-0.0431849	0.74536
beta_phellandrene	beta_elemene	-0.0835859	0.529086
ortho_cymene	beta_elemene	-0.0431794	0.745391
alpha_pinene	beta_elemene	-0.200547	0.127761
beta_pinene	beta_elemene	0.0901626	0.497062
sabinene	beta_elemene	-0.0430914	0.745893
gamma_cadinene	beta_elemene	0.351829	0.00628387
myrcene	beta_elemene	-0.0600753	0.651281
delta_3_carene	beta_elemene	-0.050409	0.704573
X1_8_cineole	beta_elemene	-0.0302732	0.81995
verbenone	beta_elemene	-0.0429372	0.746772
limonene	beta_elemene	-0.0862755	0.515867
cis_beta_ocimene	beta_elemene	-0.0302732	0.81995
trans_beta_ocimene	beta_elemene	-0.0431823	0.745375
germacreneA	beta_elemene	0.834887	2.22045e-16
germacreneB	beta_elemene	-0.0529786	0.690255
germacreneD	beta_elemene	0.0815924	0.538991
bicyclogermacrene	beta_elemene	0.170041	0.197897
X1_10_di_epi_cubenol	beta_elemene	0.512383	3.345e-05
bulnesol	beta_elemene	-0.0302732	0.81995
cis_beta_guaiene	beta_elemene	-0.0694145	0.601388
cis_cis_farnesol	beta_elemene	-0.0302732	0.81995
trans_cis_farnesol	beta_elemene	-0.0302732	0.81995
trans_beta_guaiene	beta_elemene	0.171611	0.193727
trans_caryophyllene	beta_elemene	0.130932	0.322932
caryophyllene_oxide	beta_elemene	-0.107076	0.419554
spathulenol	beta_elemene	-0.0387866	0.770546
valencene	beta_elemene	-0.0302732	0.81995
ar.curcumene	beta_elemene	-0.0302732	0.81995
junipene	beta_elemene	-0.0302732	0.81995
alpha_selinene	beta_elemene	-0.0411698	0.756868
beta_selinene	beta_elemene	-0.0302732	0.81995
guaiol	beta_elemene	-0.0302732	0.81995
Cxerosis	trans_yophyllene	-0.122091	0.356952
linalool	trans_yophyllene	-0.0303227	0.81966
camphene	trans_yophyllene	-0.0302893	0.819855
camphor	trans_yophyllene	-0.0172414	0.896875
alpha_phellandrene	trans_yophyllene	-0.024595	0.853305
beta_phellandrene	trans_yophyllene	-0.0476043	0.720317
ortho_cymene	trans_yophyllene	-0.0245918	0.853323
alpha_pinene	trans_yophyllene	-0.114217	0.389035
beta_pinene	trans_yophyllene	0.25702	0.0494002
sabinene	trans_yophyllene	-0.0245417	0.853619
gamma_cadinene	trans_yophyllene	-0.0245905	0.853331
myrcene	trans_yophyllene	-0.0342145	0.796979
delta_3_carene	trans_yophyllene	-0.0287092	0.829108
X1_8_cineole	trans_yophyllene	-0.0172414	0.896875
verbenone	trans_yophyllene	-0.0244538	0.854137
limonene	trans_yophyllene	-0.0491362	0.711703
cis_beta_ocimene	trans_yophyllene	-0.0172414	0.896875
trans_beta_ocimene	trans_yophyllene	-0.0245934	0.853314
germacreneA	trans_yophyllene	0.634031	7.01006e-08
germacreneB	trans_yophyllene	-0.0301727	0.820538
germacreneD	trans_yophyllene	0.116714	0.378682
bicyclogermacrene	trans_yophyllene	0.144252	0.275703
X1_10_di_epi_cubenol	trans_yophyllene	-0.0172414	0.896875
bulnesol	trans_yophyllene	-0.0172414	0.896875
cis_beta_guaiene	trans_yophyllene	-0.0395334	0.766252
cis_cis_farnesol	trans_yophyllene	-0.0172414	0.896875
trans_cis_farnesol	trans_yophyllene	-0.0172414	0.896875
trans_beta_guaiene	trans_yophyllene	-0.0432719	0.744864
trans_caryophyllene	trans_yophyllene	-0.0978688	0.460859
caryophyllene_oxide	trans_yophyllene	-0.0609827	0.646362
spathulenol	trans_yophyllene	-0.087311	0.510823
valencene	trans_yophyllene	-0.0172414	0.896875
ar.curcumene	trans_yophyllene	-0.0172414	0.896875
junipene	trans_yophyllene	-0.0172414	0.896875
alpha_selinene	trans_yophyllene	-0.0234473	0.86008
beta_selinene	trans_yophyllene	-0.0172414	0.896875
guaiol	trans_yophyllene	-0.0172414	0.896875
beta_elemene	trans_yophyllene	0.634687	6.73072e-08
Cxerosis	gamma_muurolene	-0.0460412	0.729143
linalool	gamma_muurolene	0.150626	0.254812
camphene	gamma_muurolene	-0.0597445	0.653079
camphor	gamma_muurolene	-0.0340079	0.798179
alpha_phellandrene	gamma_muurolene	-0.0485125	0.715206
beta_phellandrene	gamma_muurolene	0.0196713	0.882438
ortho_cymene	gamma_muurolene	-0.0485063	0.71524
alpha_pinene	gamma_muurolene	-0.225288	0.0862398
beta_pinene	gamma_muurolene	-0.139321	0.292619
sabinene	gamma_muurolene	0.232607	0.0762503
gamma_cadinene	gamma_muurolene	-0.0485037	0.715255
myrcene	gamma_muurolene	0.0890322	0.502494
delta_3_carene	gamma_muurolene	-0.0566277	0.670107
X1_8_cineole	gamma_muurolene	-0.0340079	0.798179
verbenone	gamma_muurolene	-0.0482342	0.716771
limonene	gamma_muurolene	-0.096919	0.465242
cis_beta_ocimene	gamma_muurolene	-0.0340079	0.798179
trans_beta_ocimene	gamma_muurolene	-0.0485095	0.715222
germacreneA	gamma_muurolene	0.257737	0.0487476
germacreneB	gamma_muurolene	-0.0595144	0.65433
germacreneD	gamma_muurolene	-0.177668	0.178228
bicyclogermacrene	gamma_muurolene	0.0627754	0.636687
X1_10_di_epi_cubenol	gamma_muurolene	-0.0340079	0.798179
bulnesol	gamma_muurolene	-0.0340079	0.798179
cis_beta_guaiene	gamma_muurolene	-0.077978	0.557177
cis_cis_farnesol	gamma_muurolene	-0.0340079	0.798179
trans_cis_farnesol	gamma_muurolene	-0.0340079	0.798179
trans_beta_guaiene	gamma_muurolene	0.339026	0.0086222
trans_caryophyllene	gamma_muurolene	0.0614254	0.643967
caryophyllene_oxide	gamma_muurolene	0.0221831	0.867554
spathulenol	gamma_muurolene	0.31922	0.0137258
valencene	gamma_muurolene	-0.0340079	0.798179
ar.curcumene	gamma_muurolene	-0.0340079	0.798179
junipene	gamma_muurolene	-0.0340079	0.798179
alpha_selinene	gamma_muurolene	0.411978	0.00118677
beta_selinene	gamma_muurolene	-0.0340079	0.798179
guaiol	gamma_muurolene	-0.0340079	0.798179
beta_elemene	gamma_muurolene	0.165329	0.210796
trans_yophyllene	gamma_muurolene	-0.0340079	0.798179
Cxerosis	alpha_humulene	0.163449	0.216106
linalool	alpha_humulene	-0.0432549	0.744961
camphene	alpha_humulene	-0.0432073	0.745232
camphor	alpha_humulene	-0.0245946	0.853307
alpha_phellandrene	alpha_humulene	-0.0350843	0.791932
beta_phellandrene	alpha_humulene	-0.0679069	0.609328
ortho_cymene	alpha_humulene	-0.0350799	0.791957
alpha_pinene	alpha_humulene	-0.162929	0.217591
beta_pinene	alpha_humulene	-0.100758	0.447667
sabinene	alpha_humulene	-0.0350084	0.792372
gamma_cadinene	alpha_humulene	-0.035078	0.791969
myrcene	alpha_humulene	-0.0488065	0.713554
delta_3_carene	alpha_humulene	0.309543	0.0170472
X1_8_cineole	alpha_humulene	-0.0245946	0.853307
verbenone	alpha_humulene	-0.0348831	0.793099
limonene	alpha_humulene	0.265317	0.0422663
cis_beta_ocimene	alpha_humulene	-0.0245946	0.853307
trans_beta_ocimene	alpha_humulene	0.480394	0.000117791
germacreneA	alpha_humulene	-0.0349437	0.792747
germacreneB	alpha_humulene	-0.0430409	0.746181
germacreneD	alpha_humulene	0.017568	0.894933
bicyclogermacrene	alpha_humulene	0.0819983	0.536967
X1_10_di_epi_cubenol	alpha_humulene	-0.0245946	0.853307
bulnesol	alpha_humulene	0.708474	3.44655e-10
cis_beta_guaiene	alpha_humulene	-0.0563938	0.671392
cis_cis_farnesol	alpha_humulene	-0.0245946	0.853307
trans_cis_farnesol	alpha_humulene	-0.0245946	0.853307
trans_beta_guaiene	alpha_humulene	-0.0617267	0.642339
trans_caryophyllene	alpha_humulene	0.10215	0.441385
caryophyllene_oxide	alpha_humulene	0.118236	0.372453
spathulenol	alpha_humulene	0.126077	0.341353
valencene	alpha_humulene	-0.0245946	0.853307
ar.curcumene	alpha_humulene	-0.0245946	0.853307
junipene	alpha_humulene	-0.0245946	0.853307
alpha_selinene	alpha_humulene	-0.0334472	0.801438
beta_selinene	alpha_humulene	-0.0245946	0.853307
guaiol	alpha_humulene	-0.0245946	0.853307
beta_elemene	alpha_humulene	-0.0431843	0.745363
trans_yophyllene	alpha_humulene	-0.0245946	0.853307
gamma_muurolene	alpha_humulene	-0.0485118	0.71521
Cxerosis	trans_nerolidol	0.0540321	0.684415
linalool	trans_nerolidol	0.396005	0.00190481
camphene	trans_nerolidol	-0.0887425	0.503891
camphor	trans_nerolidol	-0.0505143	0.703984
alpha_phellandrene	trans_nerolidol	0.196596	0.1356
beta_phellandrene	trans_nerolidol	-0.139473	0.29209
ortho_cymene	trans_nerolidol	0.410061	0.00125765
alpha_pinene	trans_nerolidol	-0.18393	0.163169
beta_pinene	trans_nerolidol	0.0795987	0.548987
sabinene	trans_nerolidol	-0.0719029	0.588383
gamma_cadinene	trans_nerolidol	0.140189	0.289595
myrcene	trans_nerolidol	0.0219953	0.868665
delta_3_carene	trans_nerolidol	-0.0841131	0.526482
X1_8_cineole	trans_nerolidol	-0.0505143	0.703984
verbenone	trans_nerolidol	0.121008	0.361265
limonene	trans_nerolidol	0.131038	0.322536
cis_beta_ocimene	trans_nerolidol	-0.0505143	0.703984
trans_beta_ocimene	trans_nerolidol	-0.0720545	0.587595
germacreneA	trans_nerolidol	0.151363	0.252469
germacreneB	trans_nerolidol	0.0834178	0.529918
germacreneD	trans_nerolidol	-0.196436	0.135926
bicyclogermacrene	trans_nerolidol	-0.0873854	0.510461
X1_10_di_epi_cubenol	trans_nerolidol	-0.0505143	0.703984
bulnesol	trans_nerolidol	-0.0505143	0.703984
cis_beta_guaiene	trans_nerolidol	0.0196379	0.882636
cis_cis_farnesol	trans_nerolidol	-0.0505143	0.703984
trans_cis_farnesol	trans_nerolidol	-0.0505143	0.703984
trans_beta_guaiene	trans_nerolidol	0.24195	0.0648595
trans_caryophyllene	trans_nerolidol	0.0461455	0.728553
caryophyllene_oxide	trans_nerolidol	-0.079133	0.551334
spathulenol	trans_nerolidol	-0.1248	0.346302
valencene	trans_nerolidol	-0.0505143	0.703984
ar.curcumene	trans_nerolidol	-0.0505143	0.703984
junipene	trans_nerolidol	-0.0505143	0.703984
alpha_selinene	trans_nerolidol	-0.0686965	0.605164
beta_selinene	trans_nerolidol	0.322841	0.0126348
guaiol	trans_nerolidol	-0.0505143	0.703984
beta_elemene	trans_nerolidol	0.0753742	0.570455
trans_yophyllene	trans_nerolidol	-0.0505143	0.703984
gamma_muurolene	trans_nerolidol	0.0125918	0.92459
alpha_humulene	trans_nerolidol	-0.0720579	0.587577
Cxerosis	beta_copaen_4_alpha_ol	-0.252822	0.0533692
linalool	beta_copaen_4_alpha_ol	-0.0604445	0.649278
camphene	beta_copaen_4_alpha_ol	-0.0603779	0.649639
camphor	beta_copaen_4_alpha_ol	-0.0343685	0.796085
alpha_phellandrene	beta_copaen_4_alpha_ol	-0.0490269	0.712316
beta_phellandrene	beta_copaen_4_alpha_ol	-0.0948932	0.474666
ortho_cymene	beta_copaen_4_alpha_ol	-0.0490207	0.712351
alpha_pinene	beta_copaen_4_alpha_ol	-0.166712	0.206951
beta_pinene	beta_copaen_4_alpha_ol	0.0679707	0.608991
sabinene	beta_copaen_4_alpha_ol	-0.0489207	0.712912
gamma_cadinene	beta_copaen_4_alpha_ol	-0.049018	0.712366
myrcene	beta_copaen_4_alpha_ol	-0.0682022	0.607769
delta_3_carene	beta_copaen_4_alpha_ol	-0.0572282	0.666813
X1_8_cineole	beta_copaen_4_alpha_ol	-0.0343685	0.796085
verbenone	beta_copaen_4_alpha_ol	-0.0487456	0.713896
limonene	beta_copaen_4_alpha_ol	0.182022	0.167654
cis_beta_ocimene	beta_copaen_4_alpha_ol	-0.0343685	0.796085
trans_beta_ocimene	beta_copaen_4_alpha_ol	-0.0490239	0.712333
germacreneA	beta_copaen_4_alpha_ol	-0.0488304	0.71342
germacreneB	beta_copaen_4_alpha_ol	0.234902	0.0733157
germacreneD	beta_copaen_4_alpha_ol	-0.179552	0.173595
bicyclogermacrene	beta_copaen_4_alpha_ol	-0.0119173	0.928618
X1_10_di_epi_cubenol	beta_copaen_4_alpha_ol	-0.0343685	0.796085
bulnesol	beta_copaen_4_alpha_ol	-0.0343685	0.796085
cis_beta_guaiene	beta_copaen_4_alpha_ol	-0.0788048	0.552991
cis_cis_farnesol	beta_copaen_4_alpha_ol	-0.0343685	0.796085
trans_cis_farnesol	beta_copaen_4_alpha_ol	-0.0343685	0.796085
trans_beta_guaiene	beta_copaen_4_alpha_ol	0.083821	0.527924
trans_caryophyllene	beta_copaen_4_alpha_ol	-0.195089	0.138683
caryophyllene_oxide	beta_copaen_4_alpha_ol	-0.121561	0.359059
spathulenol	beta_copaen_4_alpha_ol	-0.0471495	0.722881
valencene	beta_copaen_4_alpha_ol	-0.0343685	0.796085
ar.curcumene	beta_copaen_4_alpha_ol	-0.0343685	0.796085
junipene	beta_copaen_4_alpha_ol	-0.0343685	0.796085
alpha_selinene	beta_copaen_4_alpha_ol	-0.0467391	0.725198
beta_selinene	beta_copaen_4_alpha_ol	-0.0343685	0.796085
guaiol	beta_copaen_4_alpha_ol	-0.0343685	0.796085
beta_elemene	beta_copaen_4_alpha_ol	-0.0603458	0.649814
trans_yophyllene	beta_copaen_4_alpha_ol	-0.0343685	0.796085
gamma_muurolene	beta_copaen_4_alpha_ol	-0.0677904	0.609943
alpha_humulene	beta_copaen_4_alpha_ol	-0.0490261	0.71232
trans_nerolidol	beta_copaen_4_alpha_ol	0.383672	0.00270244
Cxerosis	beta_gurjunene	-0.0547699	0.680336
linalool	beta_gurjunene	-0.0303227	0.81966
camphene	beta_gurjunene	-0.0302893	0.819855
camphor	beta_gurjunene	-0.0172414	0.896875
alpha_phellandrene	beta_gurjunene	-0.024595	0.853305
beta_phellandrene	beta_gurjunene	-0.0476043	0.720317
ortho_cymene	beta_gurjunene	-0.0245918	0.853323
alpha_pinene	beta_gurjunene	-0.114217	0.389035
beta_pinene	beta_gurjunene	-0.0706334	0.595002
sabinene	beta_gurjunene	-0.0245417	0.853619
gamma_cadinene	beta_gurjunene	-0.0245905	0.853331
myrcene	beta_gurjunene	-0.0342145	0.796979
delta_3_carene	beta_gurjunene	-0.0287092	0.829108
X1_8_cineole	beta_gurjunene	-0.0172414	0.896875
verbenone	beta_gurjunene	-0.0244538	0.854137
limonene	beta_gurjunene	-0.0491362	0.711703
cis_beta_ocimene	beta_gurjunene	-0.0172414	0.896875
trans_beta_ocimene	beta_gurjunene	-0.0245934	0.853314
germacreneA	beta_gurjunene	-0.0244964	0.853887
germacreneB	beta_gurjunene	-0.0301727	0.820538
germacreneD	beta_gurjunene	0.140667	0.287936
bicyclogermacrene	beta_gurjunene	-0.0810327	0.541788
X1_10_di_epi_cubenol	beta_gurjunene	-0.0172414	0.896875
bulnesol	beta_gurjunene	-0.0172414	0.896875
cis_beta_guaiene	beta_gurjunene	-0.0395334	0.766252
cis_cis_farnesol	beta_gurjunene	-0.0172414	0.896875
trans_cis_farnesol	beta_gurjunene	-0.0172414	0.896875
trans_beta_guaiene	beta_gurjunene	-0.0432719	0.744864
trans_caryophyllene	beta_gurjunene	0.265632	0.0420127
caryophyllene_oxide	beta_gurjunene	0.28283	0.0299686
spathulenol	beta_gurjunene	0.114827	0.386491
valencene	beta_gurjunene	-0.0172414	0.896875
ar.curcumene	beta_gurjunene	-0.0172414	0.896875
junipene	beta_gurjunene	-0.0172414	0.896875
alpha_selinene	beta_gurjunene	-0.0234473	0.86008
beta_selinene	beta_gurjunene	-0.0172414	0.896875
guaiol	beta_gurjunene	-0.0172414	0.896875
beta_elemene	beta_gurjunene	-0.0302732	0.81995
trans_yophyllene	beta_gurjunene	-0.0172414	0.896875
gamma_muurolene	beta_gurjunene	-0.0340079	0.798179
alpha_humulene	beta_gurjunene	-0.0245946	0.853307
trans_nerolidol	beta_gurjunene	-0.0505143	0.703984
beta_copaen_4_alpha_ol	beta_gurjunene	-0.0343685	0.796085
Cxerosis	oxygenate_sesquiterpene	-0.0547699	0.680336
linalool	oxygenate_sesquiterpene	-0.0303227	0.81966
camphene	oxygenate_sesquiterpene	-0.0302893	0.819855
camphor	oxygenate_sesquiterpene	-0.0172414	0.896875
alpha_phellandrene	oxygenate_sesquiterpene	-0.024595	0.853305
beta_phellandrene	oxygenate_sesquiterpene	-0.0476043	0.720317
ortho_cymene	oxygenate_sesquiterpene	-0.0245918	0.853323
alpha_pinene	oxygenate_sesquiterpene	0.191635	0.145947
beta_pinene	oxygenate_sesquiterpene	0.322489	0.0127375
sabinene	oxygenate_sesquiterpene	-0.0245417	0.853619
gamma_cadinene	oxygenate_sesquiterpene	-0.0245905	0.853331
myrcene	oxygenate_sesquiterpene	-0.0342145	0.796979
delta_3_carene	oxygenate_sesquiterpene	-0.0287092	0.829108
X1_8_cineole	oxygenate_sesquiterpene	-0.0172414	0.896875
verbenone	oxygenate_sesquiterpene	-0.0244538	0.854137
limonene	oxygenate_sesquiterpene	-0.0491362	0.711703
cis_beta_ocimene	oxygenate_sesquiterpene	-0.0172414	0.896875
trans_beta_ocimene	oxygenate_sesquiterpene	-0.0245934	0.853314
germacreneA	oxygenate_sesquiterpene	-0.0244964	0.853887
germacreneB	oxygenate_sesquiterpene	-0.0301727	0.820538
germacreneD	oxygenate_sesquiterpene	-0.0900743	0.497485
bicyclogermacrene	oxygenate_sesquiterpene	0.20326	0.12258
X1_10_di_epi_cubenol	oxygenate_sesquiterpene	-0.0172414	0.896875
bulnesol	oxygenate_sesquiterpene	-0.0172414	0.896875
cis_beta_guaiene	oxygenate_sesquiterpene	-0.0395334	0.766252
cis_cis_farnesol	oxygenate_sesquiterpene	-0.0172414	0.896875
trans_cis_farnesol	oxygenate_sesquiterpene	-0.0172414	0.896875
trans_beta_guaiene	oxygenate_sesquiterpene	-0.0432719	0.744864
trans_caryophyllene	oxygenate_sesquiterpene	-0.0978688	0.460859
caryophyllene_oxide	oxygenate_sesquiterpene	-0.0609827	0.646362
spathulenol	oxygenate_sesquiterpene	-0.087311	0.510823
valencene	oxygenate_sesquiterpene	-0.0172414	0.896875
ar.curcumene	oxygenate_sesquiterpene	-0.0172414	0.896875
junipene	oxygenate_sesquiterpene	-0.0172414	0.896875
alpha_selinene	oxygenate_sesquiterpene	-0.0234473	0.86008
beta_selinene	oxygenate_sesquiterpene	-0.0172414	0.896875
guaiol	oxygenate_sesquiterpene	-0.0172414	0.896875
beta_elemene	oxygenate_sesquiterpene	-0.0302732	0.81995
trans_yophyllene	oxygenate_sesquiterpene	-0.0172414	0.896875
gamma_muurolene	oxygenate_sesquiterpene	-0.0340079	0.798179
alpha_humulene	oxygenate_sesquiterpene	-0.0245946	0.853307
trans_nerolidol	oxygenate_sesquiterpene	-0.0505143	0.703984
beta_copaen_4_alpha_ol	oxygenate_sesquiterpene	-0.0343685	0.796085
beta_gurjunene	oxygenate_sesquiterpene	-0.0172414	0.896875
Cxerosis	delta_cadinene	-0.189413	0.150769
linalool	delta_cadinene	0.593603	7.22571e-07
camphene	delta_cadinene	-0.0302893	0.819855
camphor	delta_cadinene	-0.0172414	0.896875
alpha_phellandrene	delta_cadinene	-0.024595	0.853305
beta_phellandrene	delta_cadinene	-0.0476043	0.720317
ortho_cymene	delta_cadinene	-0.0245918	0.853323
alpha_pinene	delta_cadinene	0.118461	0.371535
beta_pinene	delta_cadinene	-0.0706334	0.595002
sabinene	delta_cadinene	-0.0245417	0.853619
gamma_cadinene	delta_cadinene	-0.0245905	0.853331
myrcene	delta_cadinene	-0.0342145	0.796979
delta_3_carene	delta_cadinene	-0.0287092	0.829108
X1_8_cineole	delta_cadinene	-0.0172414	0.896875
verbenone	delta_cadinene	-0.0244538	0.854137
limonene	delta_cadinene	0.155001	0.241114
cis_beta_ocimene	delta_cadinene	-0.0172414	0.896875
trans_beta_ocimene	delta_cadinene	-0.0245934	0.853314
germacreneA	delta_cadinene	-0.0244964	0.853887
germacreneB	delta_cadinene	-0.0301727	0.820538
germacreneD	delta_cadinene	-0.0900743	0.497485
bicyclogermacrene	delta_cadinene	-0.0810327	0.541788
X1_10_di_epi_cubenol	delta_cadinene	-0.0172414	0.896875
bulnesol	delta_cadinene	-0.0172414	0.896875
cis_beta_guaiene	delta_cadinene	-0.0395334	0.766252
cis_cis_farnesol	delta_cadinene	-0.0172414	0.896875
trans_cis_farnesol	delta_cadinene	-0.0172414	0.896875
trans_beta_guaiene	delta_cadinene	-0.0432719	0.744864
trans_caryophyllene	delta_cadinene	0.122168	0.356648
caryophyllene_oxide	delta_cadinene	-0.0609827	0.646362
spathulenol	delta_cadinene	-0.087311	0.510823
valencene	delta_cadinene	-0.0172414	0.896875
ar.curcumene	delta_cadinene	-0.0172414	0.896875
junipene	delta_cadinene	-0.0172414	0.896875
alpha_selinene	delta_cadinene	0.452845	0.000316616
beta_selinene	delta_cadinene	-0.0172414	0.896875
guaiol	delta_cadinene	-0.0172414	0.896875
beta_elemene	delta_cadinene	-0.0302732	0.81995
trans_yophyllene	delta_cadinene	-0.0172414	0.896875
gamma_muurolene	delta_cadinene	-0.0340079	0.798179
alpha_humulene	delta_cadinene	-0.0245946	0.853307
trans_nerolidol	delta_cadinene	-0.0505143	0.703984
beta_copaen_4_alpha_ol	delta_cadinene	-0.0343685	0.796085
beta_gurjunene	delta_cadinene	-0.0172414	0.896875
oxygenate_sesquiterpene	delta_cadinene	-0.0172414	0.896875
Cxerosis	dihyidro_beta_agarofuran	-0.152677	0.248325
linalool	dihyidro_beta_agarofuran	-0.0432472	0.745005
camphene	dihyidro_beta_agarofuran	0.833507	2.22045e-16
camphor	dihyidro_beta_agarofuran	-0.0245902	0.853333
alpha_phellandrene	dihyidro_beta_agarofuran	-0.0350781	0.791968
beta_phellandrene	dihyidro_beta_agarofuran	-0.0678948	0.609392
ortho_cymene	dihyidro_beta_agarofuran	-0.0350736	0.791994
alpha_pinene	dihyidro_beta_agarofuran	0.159465	0.227663
beta_pinene	dihyidro_beta_agarofuran	-0.10074	0.447749
sabinene	dihyidro_beta_agarofuran	-0.0350021	0.792408
gamma_cadinene	dihyidro_beta_agarofuran	-0.0350717	0.792005
myrcene	dihyidro_beta_agarofuran	-0.0487978	0.713603
delta_3_carene	dihyidro_beta_agarofuran	-0.040946	0.758149
X1_8_cineole	dihyidro_beta_agarofuran	-0.0245902	0.853333
verbenone	dihyidro_beta_agarofuran	-0.0348769	0.793135
limonene	dihyidro_beta_agarofuran	-0.0700796	0.5979
cis_beta_ocimene	dihyidro_beta_agarofuran	-0.0245902	0.853333
trans_beta_ocimene	dihyidro_beta_agarofuran	-0.0350759	0.79198
germacreneA	dihyidro_beta_agarofuran	-0.0349375	0.792783
germacreneB	dihyidro_beta_agarofuran	-0.0430332	0.746224
germacreneD	dihyidro_beta_agarofuran	-0.128467	0.332203
bicyclogermacrene	dihyidro_beta_agarofuran	-0.115571	0.383398
X1_10_di_epi_cubenol	dihyidro_beta_agarofuran	-0.0245902	0.853333
bulnesol	dihyidro_beta_agarofuran	-0.0245902	0.853333
cis_beta_guaiene	dihyidro_beta_agarofuran	-0.0563838	0.671447
cis_cis_farnesol	dihyidro_beta_agarofuran	-0.0245902	0.853333
trans_cis_farnesol	dihyidro_beta_agarofuran	-0.0245902	0.853333
trans_beta_guaiene	dihyidro_beta_agarofuran	-0.0617158	0.642398
trans_caryophyllene	dihyidro_beta_agarofuran	-0.139584	0.291702
caryophyllene_oxide	dihyidro_beta_agarofuran	-0.0869755	0.512455
spathulenol	dihyidro_beta_agarofuran	-0.124526	0.347372
valencene	dihyidro_beta_agarofuran	-0.0245902	0.853333
ar.curcumene	dihyidro_beta_agarofuran	-0.0245902	0.853333
junipene	dihyidro_beta_agarofuran	-0.0245902	0.853333
alpha_selinene	dihyidro_beta_agarofuran	-0.0334412	0.801473
beta_selinene	dihyidro_beta_agarofuran	-0.0245902	0.853333
guaiol	dihyidro_beta_agarofuran	-0.0245902	0.853333
beta_elemene	dihyidro_beta_agarofuran	-0.0431766	0.745407
trans_yophyllene	dihyidro_beta_agarofuran	-0.0245902	0.853333
gamma_muurolene	dihyidro_beta_agarofuran	-0.0485032	0.715258
alpha_humulene	dihyidro_beta_agarofuran	-0.0350776	0.791971
trans_nerolidol	dihyidro_beta_agarofuran	-0.0720451	0.587644
beta_copaen_4_alpha_ol	dihyidro_beta_agarofuran	-0.0490174	0.712369
beta_gurjunene	dihyidro_beta_agarofuran	-0.0245902	0.853333
oxygenate_sesquiterpene	dihyidro_beta_agarofuran	-0.0245902	0.853333
delta_cadinene	dihyidro_beta_agarofuran	-0.0245902	0.853333
Cxerosis	X10._epi_gamma_eudesmol	-0.147762	0.264061
linalool	X10._epi_gamma_eudesmol	-0.0432486	0.744997
camphene	X10._epi_gamma_eudesmol	0.830642	4.44089e-16
camphor	X10._epi_gamma_eudesmol	-0.024591	0.853328
alpha_phellandrene	X10._epi_gamma_eudesmol	-0.0350792	0.791961
beta_phellandrene	X10._epi_gamma_eudesmol	-0.067897	0.60938
ortho_cymene	X10._epi_gamma_eudesmol	-0.0350748	0.791987
alpha_pinene	X10._epi_gamma_eudesmol	0.159321	0.228088
beta_pinene	X10._epi_gamma_eudesmol	-0.100743	0.447734
sabinene	X10._epi_gamma_eudesmol	-0.0350032	0.792402
gamma_cadinene	X10._epi_gamma_eudesmol	-0.0350728	0.791998
myrcene	X10._epi_gamma_eudesmol	-0.0487993	0.713594
delta_3_carene	X10._epi_gamma_eudesmol	-0.0409473	0.758142
X1_8_cineole	X10._epi_gamma_eudesmol	-0.024591	0.853328
verbenone	X10._epi_gamma_eudesmol	-0.034878	0.793128
limonene	X10._epi_gamma_eudesmol	-0.0700818	0.597888
cis_beta_ocimene	X10._epi_gamma_eudesmol	-0.024591	0.853328
trans_beta_ocimene	X10._epi_gamma_eudesmol	-0.0350771	0.791974
germacreneA	X10._epi_gamma_eudesmol	-0.0349386	0.792777
germacreneB	X10._epi_gamma_eudesmol	-0.0430346	0.746216
germacreneD	X10._epi_gamma_eudesmol	-0.128471	0.332188
bicyclogermacrene	X10._epi_gamma_eudesmol	-0.115575	0.383383
X1_10_di_epi_cubenol	X10._epi_gamma_eudesmol	-0.024591	0.853328
bulnesol	X10._epi_gamma_eudesmol	-0.024591	0.853328
cis_beta_guaiene	X10._epi_gamma_eudesmol	-0.0563856	0.671437
cis_cis_farnesol	X10._epi_gamma_eudesmol	-0.024591	0.853328
trans_cis_farnesol	X10._epi_gamma_eudesmol	-0.024591	0.853328
trans_beta_guaiene	X10._epi_gamma_eudesmol	-0.0617177	0.642388
trans_caryophyllene	X10._epi_gamma_eudesmol	-0.139588	0.291687
caryophyllene_oxide	X10._epi_gamma_eudesmol	-0.0869783	0.512441
spathulenol	X10._epi_gamma_eudesmol	-0.12453	0.347356
valencene	X10._epi_gamma_eudesmol	-0.024591	0.853328
ar.curcumene	X10._epi_gamma_eudesmol	-0.024591	0.853328
junipene	X10._epi_gamma_eudesmol	-0.024591	0.853328
alpha_selinene	X10._epi_gamma_eudesmol	-0.0334423	0.801467
beta_selinene	X10._epi_gamma_eudesmol	-0.024591	0.853328
guaiol	X10._epi_gamma_eudesmol	-0.024591	0.853328
beta_elemene	X10._epi_gamma_eudesmol	-0.043178	0.745399
trans_yophyllene	X10._epi_gamma_eudesmol	-0.024591	0.853328
gamma_muurolene	X10._epi_gamma_eudesmol	-0.0485047	0.715249
alpha_humulene	X10._epi_gamma_eudesmol	-0.0350787	0.791964
trans_nerolidol	X10._epi_gamma_eudesmol	-0.0720474	0.587632
beta_copaen_4_alpha_ol	X10._epi_gamma_eudesmol	-0.049019	0.71236
beta_gurjunene	X10._epi_gamma_eudesmol	-0.024591	0.853328
oxygenate_sesquiterpene	X10._epi_gamma_eudesmol	-0.024591	0.853328
delta_cadinene	X10._epi_gamma_eudesmol	-0.024591	0.853328
dihyidro_beta_agarofuran	X10._epi_gamma_eudesmol	0.999131	0
Cxerosis	X4_epi_cis_dihydro_agarofuran	-0.0211092	0.873912
linalool	X4_epi_cis_dihydro_agarofuran	-0.0303227	0.81966
camphene	X4_epi_cis_dihydro_agarofuran	0.533891	1.33292e-05
camphor	X4_epi_cis_dihydro_agarofuran	-0.0172414	0.896875
alpha_phellandrene	X4_epi_cis_dihydro_agarofuran	-0.024595	0.853305
beta_phellandrene	X4_epi_cis_dihydro_agarofuran	-0.0476043	0.720317
ortho_cymene	X4_epi_cis_dihydro_agarofuran	-0.0245918	0.853323
alpha_pinene	X4_epi_cis_dihydro_agarofuran	0.109205	0.410316
beta_pinene	X4_epi_cis_dihydro_agarofuran	-0.0706334	0.595002
sabinene	X4_epi_cis_dihydro_agarofuran	-0.0245417	0.853619
gamma_cadinene	X4_epi_cis_dihydro_agarofuran	-0.0245905	0.853331
myrcene	X4_epi_cis_dihydro_agarofuran	-0.0342145	0.796979
delta_3_carene	X4_epi_cis_dihydro_agarofuran	-0.0287092	0.829108
X1_8_cineole	X4_epi_cis_dihydro_agarofuran	-0.0172414	0.896875
verbenone	X4_epi_cis_dihydro_agarofuran	-0.0244538	0.854137
limonene	X4_epi_cis_dihydro_agarofuran	-0.0491362	0.711703
cis_beta_ocimene	X4_epi_cis_dihydro_agarofuran	-0.0172414	0.896875
trans_beta_ocimene	X4_epi_cis_dihydro_agarofuran	-0.0245934	0.853314
germacreneA	X4_epi_cis_dihydro_agarofuran	-0.0244964	0.853887
germacreneB	X4_epi_cis_dihydro_agarofuran	-0.0301727	0.820538
germacreneD	X4_epi_cis_dihydro_agarofuran	-0.0900743	0.497485
bicyclogermacrene	X4_epi_cis_dihydro_agarofuran	-0.0810327	0.541788
X1_10_di_epi_cubenol	X4_epi_cis_dihydro_agarofuran	-0.0172414	0.896875
bulnesol	X4_epi_cis_dihydro_agarofuran	-0.0172414	0.896875
cis_beta_guaiene	X4_epi_cis_dihydro_agarofuran	-0.0395334	0.766252
cis_cis_farnesol	X4_epi_cis_dihydro_agarofuran	-0.0172414	0.896875
trans_cis_farnesol	X4_epi_cis_dihydro_agarofuran	-0.0172414	0.896875
trans_beta_guaiene	X4_epi_cis_dihydro_agarofuran	-0.0432719	0.744864
trans_caryophyllene	X4_epi_cis_dihydro_agarofuran	-0.0978688	0.460859
caryophyllene_oxide	X4_epi_cis_dihydro_agarofuran	-0.0609827	0.646362
spathulenol	X4_epi_cis_dihydro_agarofuran	-0.087311	0.510823
valencene	X4_epi_cis_dihydro_agarofuran	-0.0172414	0.896875
ar.curcumene	X4_epi_cis_dihydro_agarofuran	-0.0172414	0.896875
junipene	X4_epi_cis_dihydro_agarofuran	-0.0172414	0.896875
alpha_selinene	X4_epi_cis_dihydro_agarofuran	-0.0234473	0.86008
beta_selinene	X4_epi_cis_dihydro_agarofuran	-0.0172414	0.896875
guaiol	X4_epi_cis_dihydro_agarofuran	-0.0172414	0.896875
beta_elemene	X4_epi_cis_dihydro_agarofuran	-0.0302732	0.81995
trans_yophyllene	X4_epi_cis_dihydro_agarofuran	-0.0172414	0.896875
gamma_muurolene	X4_epi_cis_dihydro_agarofuran	-0.0340079	0.798179
alpha_humulene	X4_epi_cis_dihydro_agarofuran	-0.0245946	0.853307
trans_nerolidol	X4_epi_cis_dihydro_agarofuran	-0.0505143	0.703984
beta_copaen_4_alpha_ol	X4_epi_cis_dihydro_agarofuran	-0.0343685	0.796085
beta_gurjunene	X4_epi_cis_dihydro_agarofuran	-0.0172414	0.896875
oxygenate_sesquiterpene	X4_epi_cis_dihydro_agarofuran	-0.0172414	0.896875
delta_cadinene	X4_epi_cis_dihydro_agarofuran	-0.0172414	0.896875
dihyidro_beta_agarofuran	X4_epi_cis_dihydro_agarofuran	0.685405	2.1145e-09
X10._epi_gamma_eudesmol	X4_epi_cis_dihydro_agarofuran	0.715162	1.97086e-10
Cxerosis	cubenol	-0.189413	0.150769
linalool	cubenol	-0.0303227	0.81966
camphene	cubenol	-0.0302893	0.819855
camphor	cubenol	-0.0172414	0.896875
alpha_phellandrene	cubenol	-0.024595	0.853305
beta_phellandrene	cubenol	-0.0476043	0.720317
ortho_cymene	cubenol	-0.0245918	0.853323
alpha_pinene	cubenol	-0.114217	0.389035
beta_pinene	cubenol	-0.0706334	0.595002
sabinene	cubenol	-0.0245417	0.853619
gamma_cadinene	cubenol	-0.0245905	0.853331
myrcene	cubenol	-0.0342145	0.796979
delta_3_carene	cubenol	-0.0287092	0.829108
X1_8_cineole	cubenol	-0.0172414	0.896875
verbenone	cubenol	-0.0244538	0.854137
limonene	cubenol	-0.0491362	0.711703
cis_beta_ocimene	cubenol	-0.0172414	0.896875
trans_beta_ocimene	cubenol	-0.0245934	0.853314
germacreneA	cubenol	-0.0244964	0.853887
germacreneB	cubenol	-0.0301727	0.820538
germacreneD	cubenol	-0.0900743	0.497485
bicyclogermacrene	cubenol	0.136444	0.302799
X1_10_di_epi_cubenol	cubenol	-0.0172414	0.896875
bulnesol	cubenol	-0.0172414	0.896875
cis_beta_guaiene	cubenol	-0.0395334	0.766252
cis_cis_farnesol	cubenol	-0.0172414	0.896875
trans_cis_farnesol	cubenol	-0.0172414	0.896875
trans_beta_guaiene	cubenol	-0.0432719	0.744864
trans_caryophyllene	cubenol	-0.0978688	0.460859
caryophyllene_oxide	cubenol	-0.0609827	0.646362
spathulenol	cubenol	-0.087311	0.510823
valencene	cubenol	-0.0172414	0.896875
ar.curcumene	cubenol	-0.0172414	0.896875
junipene	cubenol	-0.0172414	0.896875
alpha_selinene	cubenol	-0.0234473	0.86008
beta_selinene	cubenol	-0.0172414	0.896875
guaiol	cubenol	-0.0172414	0.896875
beta_elemene	cubenol	-0.0302732	0.81995
trans_yophyllene	cubenol	-0.0172414	0.896875
gamma_muurolene	cubenol	-0.0340079	0.798179
alpha_humulene	cubenol	-0.0245946	0.853307
trans_nerolidol	cubenol	-0.0505143	0.703984
beta_copaen_4_alpha_ol	cubenol	0.665434	8.94213e-09
beta_gurjunene	cubenol	-0.0172414	0.896875
oxygenate_sesquiterpene	cubenol	-0.0172414	0.896875
delta_cadinene	cubenol	-0.0172414	0.896875
dihyidro_beta_agarofuran	cubenol	-0.0245902	0.853333
X10._epi_gamma_eudesmol	cubenol	-0.024591	0.853328
X4_epi_cis_dihydro_agarofuran	cubenol	-0.0172414	0.896875
Cxerosis	beta_bourbonene	0.0125514	0.924831
linalool	beta_bourbonene	-0.0303227	0.81966
camphene	beta_bourbonene	-0.0302893	0.819855
camphor	beta_bourbonene	-0.0172414	0.896875
alpha_phellandrene	beta_bourbonene	-0.024595	0.853305
beta_phellandrene	beta_bourbonene	-0.0476043	0.720317
ortho_cymene	beta_bourbonene	-0.0245918	0.853323
alpha_pinene	beta_bourbonene	-0.114217	0.389035
beta_pinene	beta_bourbonene	-0.0706334	0.595002
sabinene	beta_bourbonene	-0.0245417	0.853619
gamma_cadinene	beta_bourbonene	-0.0245905	0.853331
myrcene	beta_bourbonene	-0.0342145	0.796979
delta_3_carene	beta_bourbonene	-0.0287092	0.829108
X1_8_cineole	beta_bourbonene	-0.0172414	0.896875
verbenone	beta_bourbonene	-0.0244538	0.854137
limonene	beta_bourbonene	-0.0491362	0.711703
cis_beta_ocimene	beta_bourbonene	-0.0172414	0.896875
trans_beta_ocimene	beta_bourbonene	-0.0245934	0.853314
germacreneA	beta_bourbonene	-0.0244964	0.853887
germacreneB	beta_bourbonene	-0.0301727	0.820538
germacreneD	beta_bourbonene	-0.0900743	0.497485
bicyclogermacrene	beta_bourbonene	-0.0810327	0.541788
X1_10_di_epi_cubenol	beta_bourbonene	-0.0172414	0.896875
bulnesol	beta_bourbonene	-0.0172414	0.896875
cis_beta_guaiene	beta_bourbonene	-0.0395334	0.766252
cis_cis_farnesol	beta_bourbonene	-0.0172414	0.896875
trans_cis_farnesol	beta_bourbonene	-0.0172414	0.896875
trans_beta_guaiene	beta_bourbonene	0.551124	6.08634e-06
trans_caryophyllene	beta_bourbonene	-0.0978688	0.460859
caryophyllene_oxide	beta_bourbonene	-0.0609827	0.646362
spathulenol	beta_bourbonene	0.172337	0.191822
valencene	beta_bourbonene	-0.0172414	0.896875
ar.curcumene	beta_bourbonene	-0.0172414	0.896875
junipene	beta_bourbonene	-0.0172414	0.896875
alpha_selinene	beta_bourbonene	-0.0234473	0.86008
beta_selinene	beta_bourbonene	-0.0172414	0.896875
guaiol	beta_bourbonene	-0.0172414	0.896875
beta_elemene	beta_bourbonene	-0.0302732	0.81995
trans_yophyllene	beta_bourbonene	-0.0172414	0.896875
gamma_muurolene	beta_bourbonene	0.692268	1.25444e-09
alpha_humulene	beta_bourbonene	-0.0245946	0.853307
trans_nerolidol	beta_bourbonene	-0.0505143	0.703984
beta_copaen_4_alpha_ol	beta_bourbonene	-0.0343685	0.796085
beta_gurjunene	beta_bourbonene	-0.0172414	0.896875
oxygenate_sesquiterpene	beta_bourbonene	-0.0172414	0.896875
delta_cadinene	beta_bourbonene	-0.0172414	0.896875
dihyidro_beta_agarofuran	beta_bourbonene	-0.0245902	0.853333
X10._epi_gamma_eudesmol	beta_bourbonene	-0.024591	0.853328
X4_epi_cis_dihydro_agarofuran	beta_bourbonene	-0.0172414	0.896875
cubenol	beta_bourbonene	-0.0172414	0.896875
Cxerosis	beta_bisabolene	0.0125514	0.924831
linalool	beta_bisabolene	-0.0303227	0.81966
camphene	beta_bisabolene	-0.0302893	0.819855
camphor	beta_bisabolene	-0.0172414	0.896875
alpha_phellandrene	beta_bisabolene	-0.024595	0.853305
beta_phellandrene	beta_bisabolene	-0.0476043	0.720317
ortho_cymene	beta_bisabolene	-0.0245918	0.853323
alpha_pinene	beta_bisabolene	-0.114217	0.389035
beta_pinene	beta_bisabolene	-0.0706334	0.595002
sabinene	beta_bisabolene	-0.0245417	0.853619
gamma_cadinene	beta_bisabolene	0.715871	1.85572e-10
myrcene	beta_bisabolene	-0.0342145	0.796979
delta_3_carene	beta_bisabolene	-0.0287092	0.829108
X1_8_cineole	beta_bisabolene	-0.0172414	0.896875
verbenone	beta_bisabolene	-0.0244538	0.854137
limonene	beta_bisabolene	-0.0491362	0.711703
cis_beta_ocimene	beta_bisabolene	-0.0172414	0.896875
trans_beta_ocimene	beta_bisabolene	-0.0245934	0.853314
germacreneA	beta_bisabolene	-0.0244964	0.853887
germacreneB	beta_bisabolene	-0.0301727	0.820538
germacreneD	beta_bisabolene	0.105955	0.424466
bicyclogermacrene	beta_bisabolene	-0.0810327	0.541788
X1_10_di_epi_cubenol	beta_bisabolene	1	0
bulnesol	beta_bisabolene	-0.0172414	0.896875
cis_beta_guaiene	beta_bisabolene	-0.0395334	0.766252
cis_cis_farnesol	beta_bisabolene	-0.0172414	0.896875
trans_cis_farnesol	beta_bisabolene	-0.0172414	0.896875
trans_beta_guaiene	beta_bisabolene	0.42085	0.000903263
trans_caryophyllene	beta_bisabolene	0.115837	0.382298
caryophyllene_oxide	beta_bisabolene	-0.0609827	0.646362
spathulenol	beta_bisabolene	-0.087311	0.510823
valencene	beta_bisabolene	-0.0172414	0.896875
ar.curcumene	beta_bisabolene	-0.0172414	0.896875
junipene	beta_bisabolene	-0.0172414	0.896875
alpha_selinene	beta_bisabolene	-0.0234473	0.86008
beta_selinene	beta_bisabolene	-0.0172414	0.896875
guaiol	beta_bisabolene	-0.0172414	0.896875
beta_elemene	beta_bisabolene	0.512383	3.345e-05
trans_yophyllene	beta_bisabolene	-0.0172414	0.896875
gamma_muurolene	beta_bisabolene	-0.0340079	0.798179
alpha_humulene	beta_bisabolene	-0.0245946	0.853307
trans_nerolidol	beta_bisabolene	-0.0505143	0.703984
beta_copaen_4_alpha_ol	beta_bisabolene	-0.0343685	0.796085
beta_gurjunene	beta_bisabolene	-0.0172414	0.896875
oxygenate_sesquiterpene	beta_bisabolene	-0.0172414	0.896875
delta_cadinene	beta_bisabolene	-0.0172414	0.896875
dihyidro_beta_agarofuran	beta_bisabolene	-0.0245902	0.853333
X10._epi_gamma_eudesmol	beta_bisabolene	-0.024591	0.853328
X4_epi_cis_dihydro_agarofuran	beta_bisabolene	-0.0172414	0.896875
cubenol	beta_bisabolene	-0.0172414	0.896875
beta_bourbonene	beta_bisabolene	-0.0172414	0.896875
Cxerosis	aromadendrene	-0.122091	0.356952
linalool	aromadendrene	-0.0303227	0.81966
camphene	aromadendrene	-0.0302893	0.819855
camphor	aromadendrene	-0.0172414	0.896875
alpha_phellandrene	aromadendrene	-0.024595	0.853305
beta_phellandrene	aromadendrene	-0.0476043	0.720317
ortho_cymene	aromadendrene	-0.0245918	0.853323
alpha_pinene	aromadendrene	-0.114217	0.389035
beta_pinene	aromadendrene	-0.0706334	0.595002
sabinene	aromadendrene	-0.0245417	0.853619
gamma_cadinene	aromadendrene	-0.0245905	0.853331
myrcene	aromadendrene	-0.0342145	0.796979
delta_3_carene	aromadendrene	0.343485	0.0077339
X1_8_cineole	aromadendrene	-0.0172414	0.896875
verbenone	aromadendrene	-0.0244538	0.854137
limonene	aromadendrene	-0.0491362	0.711703
cis_beta_ocimene	aromadendrene	-0.0172414	0.896875
trans_beta_ocimene	aromadendrene	-0.0245934	0.853314
germacreneA	aromadendrene	-0.0244964	0.853887
germacreneB	aromadendrene	-0.0301727	0.820538
germacreneD	aromadendrene	0.141692	0.284402
bicyclogermacrene	aromadendrene	0.273598	0.0360136
X1_10_di_epi_cubenol	aromadendrene	-0.0172414	0.896875
bulnesol	aromadendrene	-0.0172414	0.896875
cis_beta_guaiene	aromadendrene	-0.0395334	0.766252
cis_cis_farnesol	aromadendrene	-0.0172414	0.896875
trans_cis_farnesol	aromadendrene	-0.0172414	0.896875
trans_beta_guaiene	aromadendrene	-0.0432719	0.744864
trans_caryophyllene	aromadendrene	0.103972	0.433239
caryophyllene_oxide	aromadendrene	0.164122	0.214194
spathulenol	aromadendrene	0.167984	0.203457
valencene	aromadendrene	-0.0172414	0.896875
ar.curcumene	aromadendrene	-0.0172414	0.896875
junipene	aromadendrene	-0.0172414	0.896875
alpha_selinene	aromadendrene	-0.0234473	0.86008
beta_selinene	aromadendrene	-0.0172414	0.896875
guaiol	aromadendrene	-0.0172414	0.896875
beta_elemene	aromadendrene	-0.0302732	0.81995
trans_yophyllene	aromadendrene	-0.0172414	0.896875
gamma_muurolene	aromadendrene	-0.0340079	0.798179
alpha_humulene	aromadendrene	-0.0245946	0.853307
trans_nerolidol	aromadendrene	-0.0505143	0.703984
beta_copaen_4_alpha_ol	aromadendrene	-0.0343685	0.796085
beta_gurjunene	aromadendrene	-0.0172414	0.896875
oxygenate_sesquiterpene	aromadendrene	-0.0172414	0.896875
delta_cadinene	aromadendrene	-0.0172414	0.896875
dihyidro_beta_agarofuran	aromadendrene	-0.0245902	0.853333
X10._epi_gamma_eudesmol	aromadendrene	-0.024591	0.853328
X4_epi_cis_dihydro_agarofuran	aromadendrene	-0.0172414	0.896875
cubenol	aromadendrene	-0.0172414	0.896875
beta_bourbonene	aromadendrene	-0.0172414	0.896875
beta_bisabolene	aromadendrene	-0.0172414	0.896875
Cxerosis	elemicine	-0.189413	0.150769
linalool	elemicine	-0.0303227	0.81966
camphene	elemicine	-0.0302893	0.819855
camphor	elemicine	-0.0172414	0.896875
alpha_phellandrene	elemicine	-0.024595	0.853305
beta_phellandrene	elemicine	-0.0476043	0.720317
ortho_cymene	elemicine	-0.0245918	0.853323
alpha_pinene	elemicine	-0.114217	0.389035
beta_pinene	elemicine	-0.0706334	0.595002
sabinene	elemicine	-0.0245417	0.853619
gamma_cadinene	elemicine	-0.0245905	0.853331
myrcene	elemicine	-0.0342145	0.796979
delta_3_carene	elemicine	-0.0287092	0.829108
X1_8_cineole	elemicine	-0.0172414	0.896875
verbenone	elemicine	-0.0244538	0.854137
limonene	elemicine	-0.0491362	0.711703
cis_beta_ocimene	elemicine	-0.0172414	0.896875
trans_beta_ocimene	elemicine	-0.0245934	0.853314
germacreneA	elemicine	-0.0244964	0.853887
germacreneB	elemicine	-0.0301727	0.820538
germacreneD	elemicine	0.129184	0.329487
bicyclogermacrene	elemicine	-0.0810327	0.541788
X1_10_di_epi_cubenol	elemicine	-0.0172414	0.896875
bulnesol	elemicine	-0.0172414	0.896875
cis_beta_guaiene	elemicine	0.478728	0.000125351
cis_cis_farnesol	elemicine	-0.0172414	0.896875
trans_cis_farnesol	elemicine	-0.0172414	0.896875
trans_beta_guaiene	elemicine	-0.0432719	0.744864
trans_caryophyllene	elemicine	0.106276	0.423055
caryophyllene_oxide	elemicine	0.2011	0.126693
spathulenol	elemicine	0.22503	0.0866102
valencene	elemicine	-0.0172414	0.896875
ar.curcumene	elemicine	-0.0172414	0.896875
junipene	elemicine	-0.0172414	0.896875
alpha_selinene	elemicine	-0.0234473	0.86008
beta_selinene	elemicine	-0.0172414	0.896875
guaiol	elemicine	-0.0172414	0.896875
beta_elemene	elemicine	-0.0302732	0.81995
trans_yophyllene	elemicine	-0.0172414	0.896875
gamma_muurolene	elemicine	-0.0340079	0.798179
alpha_humulene	elemicine	-0.0245946	0.853307
trans_nerolidol	elemicine	-0.0505143	0.703984
beta_copaen_4_alpha_ol	elemicine	-0.0343685	0.796085
beta_gurjunene	elemicine	-0.0172414	0.896875
oxygenate_sesquiterpene	elemicine	-0.0172414	0.896875
delta_cadinene	elemicine	-0.0172414	0.896875
dihyidro_beta_agarofuran	elemicine	-0.0245902	0.853333
X10._epi_gamma_eudesmol	elemicine	-0.024591	0.853328
X4_epi_cis_dihydro_agarofuran	elemicine	-0.0172414	0.896875
cubenol	elemicine	-0.0172414	0.896875
beta_bourbonene	elemicine	-0.0172414	0.896875
beta_bisabolene	elemicine	-0.0172414	0.896875
aromadendrene	elemicine	-0.0172414	0.896875
Cxerosis	asaricin	-0.061864	0.641598
linalool	asaricin	-0.0523067	0.693988
camphene	asaricin	-0.0522491	0.694308
camphor	asaricin	-0.0297414	0.823061
alpha_phellandrene	asaricin	-0.0424263	0.749686
beta_phellandrene	asaricin	-0.0821175	0.536373
ortho_cymene	asaricin	-0.0424209	0.749717
alpha_pinene	asaricin	-0.126591	0.33937
beta_pinene	asaricin	-0.121843	0.35794
sabinene	asaricin	-0.0423344	0.75021
gamma_cadinene	asaricin	-0.0424186	0.74973
myrcene	asaricin	-0.05902	0.657022
delta_3_carene	asaricin	-0.0495234	0.709531
X1_8_cineole	asaricin	-0.0297414	0.823061
verbenone	asaricin	-0.0421829	0.751075
limonene	asaricin	-0.0847599	0.523296
cis_beta_ocimene	asaricin	-0.0297414	0.823061
trans_beta_ocimene	asaricin	-0.0424237	0.749701
germacreneA	asaricin	-0.0422562	0.750657
germacreneB	asaricin	-0.0520479	0.695428
germacreneD	asaricin	-0.155378	0.239954
bicyclogermacrene	asaricin	-0.139781	0.291012
X1_10_di_epi_cubenol	asaricin	-0.0297414	0.823061
bulnesol	asaricin	-0.0297414	0.823061
cis_beta_guaiene	asaricin	-0.0681951	0.607806
cis_cis_farnesol	asaricin	-0.0297414	0.823061
trans_cis_farnesol	asaricin	-0.0297414	0.823061
trans_beta_guaiene	asaricin	-0.0746441	0.574205
trans_caryophyllene	asaricin	-0.168824	0.201175
caryophyllene_oxide	asaricin	-0.105195	0.427815
spathulenol	asaricin	-0.036941	0.781187
valencene	asaricin	0.38599	0.00253309
ar.curcumene	asaricin	-0.0297414	0.823061
junipene	asaricin	-0.0297414	0.823061
alpha_selinene	asaricin	-0.0404466	0.761011
beta_selinene	asaricin	-0.0297414	0.823061
guaiol	asaricin	-0.0297414	0.823061
beta_elemene	asaricin	-0.0522213	0.694463
trans_yophyllene	asaricin	-0.0297414	0.823061
gamma_muurolene	asaricin	-0.0586637	0.658964
alpha_humulene	asaricin	-0.0424257	0.749689
trans_nerolidol	asaricin	-0.0871372	0.511668
beta_copaen_4_alpha_ol	asaricin	-0.0592857	0.655575
beta_gurjunene	asaricin	-0.0297414	0.823061
oxygenate_sesquiterpene	asaricin	-0.0297414	0.823061
delta_cadinene	asaricin	-0.0297414	0.823061
dihyidro_beta_agarofuran	asaricin	-0.0424181	0.749733
X10._epi_gamma_eudesmol	asaricin	-0.0424195	0.749725
X4_epi_cis_dihydro_agarofuran	asaricin	-0.0297414	0.823061
cubenol	asaricin	-0.0297414	0.823061
beta_bourbonene	asaricin	-0.0297414	0.823061
beta_bisabolene	asaricin	-0.0297414	0.823061
aromadendrene	asaricin	-0.0297414	0.823061
elemicine	asaricin	-0.0297414	0.823061
Cxerosis	safrol	-0.0342374	0.796846
linalool	safrol	-0.0534328	0.687735
camphene	safrol	-0.053374	0.688061
camphor	safrol	-0.0303817	0.819315
alpha_phellandrene	safrol	-0.0433397	0.744478
beta_phellandrene	safrol	-0.0838854	0.527606
ortho_cymene	safrol	-0.0433342	0.74451
alpha_pinene	safrol	-0.0965453	0.466973
beta_pinene	safrol	-0.124466	0.347606
sabinene	safrol	-0.0432458	0.745013
gamma_cadinene	safrol	-0.0433318	0.744523
myrcene	safrol	-0.0602907	0.650113
delta_3_carene	safrol	-0.0505896	0.703563
X1_8_cineole	safrol	-0.0303817	0.819315
verbenone	safrol	-0.0430911	0.745895
limonene	safrol	-0.0865847	0.514359
cis_beta_ocimene	safrol	-0.0303817	0.819315
trans_beta_ocimene	safrol	-0.043337	0.744493
germacreneA	safrol	-0.043166	0.745468
germacreneB	safrol	-0.0531684	0.689201
germacreneD	safrol	-0.158723	0.229859
bicyclogermacrene	safrol	-0.142791	0.280646
X1_10_di_epi_cubenol	safrol	-0.0303817	0.819315
bulnesol	safrol	-0.0303817	0.819315
cis_beta_guaiene	safrol	-0.0696633	0.600082
cis_cis_farnesol	safrol	-0.0303817	0.819315
trans_cis_farnesol	safrol	-0.0303817	0.819315
trans_beta_guaiene	safrol	-0.0762511	0.565967
trans_caryophyllene	safrol	-0.172458	0.191503
caryophyllene_oxide	safrol	-0.10746	0.41788
spathulenol	safrol	0.0151526	0.909312
valencene	safrol	0.587732	9.87844e-07
ar.curcumene	safrol	-0.0303817	0.819315
junipene	safrol	-0.0303817	0.819315
alpha_selinene	safrol	-0.0413173	0.756024
beta_selinene	safrol	-0.0303817	0.819315
guaiol	safrol	-0.0303817	0.819315
beta_elemene	safrol	-0.0533456	0.688218
trans_yophyllene	safrol	-0.0303817	0.819315
gamma_muurolene	safrol	-0.0599266	0.652089
alpha_humulene	safrol	-0.0433391	0.744482
trans_nerolidol	safrol	-0.0890131	0.502586
beta_copaen_4_alpha_ol	safrol	-0.060562	0.648641
beta_gurjunene	safrol	-0.0303817	0.819315
oxygenate_sesquiterpene	safrol	-0.0303817	0.819315
delta_cadinene	safrol	-0.0303817	0.819315
dihyidro_beta_agarofuran	safrol	-0.0433313	0.744526
X10._epi_gamma_eudesmol	safrol	-0.0433327	0.744518
X4_epi_cis_dihydro_agarofuran	safrol	-0.0303817	0.819315
cubenol	safrol	-0.0303817	0.819315
beta_bourbonene	safrol	-0.0303817	0.819315
beta_bisabolene	safrol	-0.0303817	0.819315
aromadendrene	safrol	-0.0303817	0.819315
elemicine	safrol	-0.0303817	0.819315
asaricin	safrol	0.973201	0
Cxerosis	methyl_iso_eugenol	0.41648	0.00103423
linalool	methyl_iso_eugenol	-0.0303227	0.81966
camphene	methyl_iso_eugenol	-0.0302893	0.819855
camphor	methyl_iso_eugenol	-0.0172414	0.896875
alpha_phellandrene	methyl_iso_eugenol	-0.024595	0.853305
beta_phellandrene	methyl_iso_eugenol	-0.0476043	0.720317
ortho_cymene	methyl_iso_eugenol	-0.0245918	0.853323
alpha_pinene	methyl_iso_eugenol	-0.114217	0.389035
beta_pinene	methyl_iso_eugenol	-0.0706334	0.595002
sabinene	methyl_iso_eugenol	-0.0245417	0.853619
gamma_cadinene	methyl_iso_eugenol	-0.0245905	0.853331
myrcene	methyl_iso_eugenol	-0.0342145	0.796979
delta_3_carene	methyl_iso_eugenol	-0.0287092	0.829108
X1_8_cineole	methyl_iso_eugenol	-0.0172414	0.896875
verbenone	methyl_iso_eugenol	-0.0244538	0.854137
limonene	methyl_iso_eugenol	-0.0491362	0.711703
cis_beta_ocimene	methyl_iso_eugenol	-0.0172414	0.896875
trans_beta_ocimene	methyl_iso_eugenol	-0.0245934	0.853314
germacreneA	methyl_iso_eugenol	-0.0244964	0.853887
germacreneB	methyl_iso_eugenol	-0.0301727	0.820538
germacreneD	methyl_iso_eugenol	-0.0900743	0.497485
bicyclogermacrene	methyl_iso_eugenol	-0.0810327	0.541788
X1_10_di_epi_cubenol	methyl_iso_eugenol	-0.0172414	0.896875
bulnesol	methyl_iso_eugenol	-0.0172414	0.896875
cis_beta_guaiene	methyl_iso_eugenol	-0.0395334	0.766252
cis_cis_farnesol	methyl_iso_eugenol	-0.0172414	0.896875
trans_cis_farnesol	methyl_iso_eugenol	-0.0172414	0.896875
trans_beta_guaiene	methyl_iso_eugenol	-0.0432719	0.744864
trans_caryophyllene	methyl_iso_eugenol	-0.0978688	0.460859
caryophyllene_oxide	methyl_iso_eugenol	-0.0609827	0.646362
spathulenol	methyl_iso_eugenol	-0.087311	0.510823
valencene	methyl_iso_eugenol	-0.0172414	0.896875
ar.curcumene	methyl_iso_eugenol	-0.0172414	0.896875
junipene	methyl_iso_eugenol	-0.0172414	0.896875
alpha_selinene	methyl_iso_eugenol	-0.0234473	0.86008
beta_selinene	methyl_iso_eugenol	-0.0172414	0.896875
guaiol	methyl_iso_eugenol	-0.0172414	0.896875
beta_elemene	methyl_iso_eugenol	-0.0302732	0.81995
trans_yophyllene	methyl_iso_eugenol	-0.0172414	0.896875
gamma_muurolene	methyl_iso_eugenol	-0.0340079	0.798179
alpha_humulene	methyl_iso_eugenol	-0.0245946	0.853307
trans_nerolidol	methyl_iso_eugenol	-0.0505143	0.703984
beta_copaen_4_alpha_ol	methyl_iso_eugenol	-0.0343685	0.796085
beta_gurjunene	methyl_iso_eugenol	-0.0172414	0.896875
oxygenate_sesquiterpene	methyl_iso_eugenol	-0.0172414	0.896875
delta_cadinene	methyl_iso_eugenol	-0.0172414	0.896875
dihyidro_beta_agarofuran	methyl_iso_eugenol	-0.0245902	0.853333
X10._epi_gamma_eudesmol	methyl_iso_eugenol	-0.024591	0.853328
X4_epi_cis_dihydro_agarofuran	methyl_iso_eugenol	-0.0172414	0.896875
cubenol	methyl_iso_eugenol	-0.0172414	0.896875
beta_bourbonene	methyl_iso_eugenol	-0.0172414	0.896875
beta_bisabolene	methyl_iso_eugenol	-0.0172414	0.896875
aromadendrene	methyl_iso_eugenol	-0.0172414	0.896875
elemicine	methyl_iso_eugenol	-0.0172414	0.896875
asaricin	methyl_iso_eugenol	-0.0297414	0.823061
safrol	methyl_iso_eugenol	-0.0303817	0.819315
Cxerosis	methyl_eugenol	0.297129	0.022293
linalool	methyl_eugenol	-0.0424655	0.749462
camphene	methyl_eugenol	0.274801	0.035173
camphor	methyl_eugenol	0.552321	5.75428e-06
alpha_phellandrene	methyl_eugenol	-0.034444	0.795646
beta_phellandrene	methyl_eugenol	-0.0666676	0.615889
ortho_cymene	methyl_eugenol	-0.0344397	0.795672
alpha_pinene	methyl_eugenol	-0.159955	0.226217
beta_pinene	methyl_eugenol	-0.0989187	0.45604
sabinene	methyl_eugenol	-0.0343694	0.796079
gamma_cadinene	methyl_eugenol	-0.0344378	0.795683
myrcene	methyl_eugenol	-0.0479157	0.718563
delta_3_carene	methyl_eugenol	-0.0402059	0.762392
X1_8_cineole	methyl_eugenol	-0.0241457	0.855956
verbenone	methyl_eugenol	-0.0342464	0.796794
limonene	methyl_eugenol	0.0786602	0.553722
cis_beta_ocimene	methyl_eugenol	-0.0241457	0.855956
trans_beta_ocimene	methyl_eugenol	-0.0344419	0.795659
germacreneA	methyl_eugenol	-0.034306	0.796448
germacreneB	methyl_eugenol	-0.0422554	0.750662
germacreneD	methyl_eugenol	-0.126145	0.341089
bicyclogermacrene	methyl_eugenol	-0.113482	0.392112
X1_10_di_epi_cubenol	methyl_eugenol	-0.0241457	0.855956
bulnesol	methyl_eugenol	-0.0241457	0.855956
cis_beta_guaiene	methyl_eugenol	-0.0553646	0.677056
cis_cis_farnesol	methyl_eugenol	-0.0241457	0.855956
trans_cis_farnesol	methyl_eugenol	-0.0241457	0.855956
trans_beta_guaiene	methyl_eugenol	-0.0606002	0.648434
trans_caryophyllene	methyl_eugenol	-0.137061	0.300598
caryophyllene_oxide	methyl_eugenol	-0.0854034	0.520135
spathulenol	methyl_eugenol	-0.122275	0.356224
valencene	methyl_eugenol	-0.0241457	0.855956
ar.curcumene	methyl_eugenol	-0.0241457	0.855956
junipene	methyl_eugenol	-0.0241457	0.855956
alpha_selinene	methyl_eugenol	-0.0328368	0.80499
beta_selinene	methyl_eugenol	-0.0241457	0.855956
guaiol	methyl_eugenol	-0.0241457	0.855956
beta_elemene	methyl_eugenol	-0.0423962	0.749858
trans_yophyllene	methyl_eugenol	-0.0241457	0.855956
gamma_muurolene	methyl_eugenol	-0.0476264	0.720192
alpha_humulene	methyl_eugenol	-0.0344435	0.795649
trans_nerolidol	methyl_eugenol	-0.0707428	0.59443
beta_copaen_4_alpha_ol	methyl_eugenol	-0.0481314	0.717349
beta_gurjunene	methyl_eugenol	-0.0241457	0.855956
oxygenate_sesquiterpene	methyl_eugenol	-0.0241457	0.855956
delta_cadinene	methyl_eugenol	-0.0241457	0.855956
dihyidro_beta_agarofuran	methyl_eugenol	-0.0344374	0.795685
X10._epi_gamma_eudesmol	methyl_eugenol	-0.0344385	0.795678
X4_epi_cis_dihydro_agarofuran	methyl_eugenol	-0.0241457	0.855956
cubenol	methyl_eugenol	-0.0241457	0.855956
beta_bourbonene	methyl_eugenol	-0.0241457	0.855956
beta_bisabolene	methyl_eugenol	-0.0241457	0.855956
aromadendrene	methyl_eugenol	-0.0241457	0.855956
elemicine	methyl_eugenol	-0.0241457	0.855956
asaricin	methyl_eugenol	-0.0416514	0.754113
safrol	methyl_eugenol	-0.0425481	0.748991
methyl_iso_eugenol	methyl_eugenol	0.823985	1.11022e-15
Cxerosis	benzyl_salicylate	-0.0884306	0.505397
linalool	benzyl_salicylate	-0.0303227	0.81966
camphene	benzyl_salicylate	-0.0302893	0.819855
camphor	benzyl_salicylate	-0.0172414	0.896875
alpha_phellandrene	benzyl_salicylate	-0.024595	0.853305
beta_phellandrene	benzyl_salicylate	-0.0476043	0.720317
ortho_cymene	benzyl_salicylate	-0.0245918	0.853323
alpha_pinene	benzyl_salicylate	0.0977038	0.461619
beta_pinene	benzyl_salicylate	0.149812	0.257419
sabinene	benzyl_salicylate	-0.0245417	0.853619
gamma_cadinene	benzyl_salicylate	-0.0245905	0.853331
myrcene	benzyl_salicylate	-0.0342145	0.796979
delta_3_carene	benzyl_salicylate	-0.0287092	0.829108
X1_8_cineole	benzyl_salicylate	-0.0172414	0.896875
verbenone	benzyl_salicylate	-0.0244538	0.854137
limonene	benzyl_salicylate	-0.0491362	0.711703
cis_beta_ocimene	benzyl_salicylate	-0.0172414	0.896875
trans_beta_ocimene	benzyl_salicylate	-0.0245934	0.853314
germacreneA	benzyl_salicylate	-0.0244964	0.853887
germacreneB	benzyl_salicylate	-0.0301727	0.820538
germacreneD	benzyl_salicylate	-0.0900743	0.497485
bicyclogermacrene	benzyl_salicylate	-0.0810327	0.541788
X1_10_di_epi_cubenol	benzyl_salicylate	-0.0172414	0.896875
bulnesol	benzyl_salicylate	-0.0172414	0.896875
cis_beta_guaiene	benzyl_salicylate	-0.0395334	0.766252
cis_cis_farnesol	benzyl_salicylate	-0.0172414	0.896875
trans_cis_farnesol	benzyl_salicylate	-0.0172414	0.896875
trans_beta_guaiene	benzyl_salicylate	-0.0432719	0.744864
trans_caryophyllene	benzyl_salicylate	-0.0978688	0.460859
caryophyllene_oxide	benzyl_salicylate	-0.0609827	0.646362
spathulenol	benzyl_salicylate	0.145662	0.270987
valencene	benzyl_salicylate	-0.0172414	0.896875
ar.curcumene	benzyl_salicylate	-0.0172414	0.896875
junipene	benzyl_salicylate	-0.0172414	0.896875
alpha_selinene	benzyl_salicylate	-0.0234473	0.86008
beta_selinene	benzyl_salicylate	-0.0172414	0.896875
guaiol	benzyl_salicylate	-0.0172414	0.896875
beta_elemene	benzyl_salicylate	-0.0302732	0.81995
trans_yophyllene	benzyl_salicylate	-0.0172414	0.896875
gamma_muurolene	benzyl_salicylate	-0.0340079	0.798179
alpha_humulene	benzyl_salicylate	-0.0245946	0.853307
trans_nerolidol	benzyl_salicylate	-0.0505143	0.703984
beta_copaen_4_alpha_ol	benzyl_salicylate	-0.0343685	0.796085
beta_gurjunene	benzyl_salicylate	-0.0172414	0.896875
oxygenate_sesquiterpene	benzyl_salicylate	-0.0172414	0.896875
delta_cadinene	benzyl_salicylate	-0.0172414	0.896875
dihyidro_beta_agarofuran	benzyl_salicylate	-0.0245902	0.853333
X10._epi_gamma_eudesmol	benzyl_salicylate	-0.024591	0.853328
X4_epi_cis_dihydro_agarofuran	benzyl_salicylate	-0.0172414	0.896875
cubenol	benzyl_salicylate	-0.0172414	0.896875
beta_bourbonene	benzyl_salicylate	-0.0172414	0.896875
beta_bisabolene	benzyl_salicylate	-0.0172414	0.896875
aromadendrene	benzyl_salicylate	-0.0172414	0.896875
elemicine	benzyl_salicylate	-0.0172414	0.896875
asaricin	benzyl_salicylate	-0.0297414	0.823061
safrol	benzyl_salicylate	-0.0303817	0.819315
methyl_iso_eugenol	benzyl_salicylate	-0.0172414	0.896875
methyl_eugenol	benzyl_salicylate	-0.0241457	0.855956
Cxerosis	benzyl_benzoate	-0.0884306	0.505397
linalool	benzyl_benzoate	-0.0303227	0.81966
camphene	benzyl_benzoate	-0.0302893	0.819855
camphor	benzyl_benzoate	-0.0172414	0.896875
alpha_phellandrene	benzyl_benzoate	-0.024595	0.853305
beta_phellandrene	benzyl_benzoate	-0.0476043	0.720317
ortho_cymene	benzyl_benzoate	-0.0245918	0.853323
alpha_pinene	benzyl_benzoate	0.0977038	0.461619
beta_pinene	benzyl_benzoate	0.149812	0.257419
sabinene	benzyl_benzoate	-0.0245417	0.853619
gamma_cadinene	benzyl_benzoate	-0.0245905	0.853331
myrcene	benzyl_benzoate	-0.0342145	0.796979
delta_3_carene	benzyl_benzoate	-0.0287092	0.829108
X1_8_cineole	benzyl_benzoate	-0.0172414	0.896875
verbenone	benzyl_benzoate	-0.0244538	0.854137
limonene	benzyl_benzoate	-0.0491362	0.711703
cis_beta_ocimene	benzyl_benzoate	-0.0172414	0.896875
trans_beta_ocimene	benzyl_benzoate	-0.0245934	0.853314
germacreneA	benzyl_benzoate	-0.0244964	0.853887
germacreneB	benzyl_benzoate	-0.0301727	0.820538
germacreneD	benzyl_benzoate	-0.0900743	0.497485
bicyclogermacrene	benzyl_benzoate	-0.0810327	0.541788
X1_10_di_epi_cubenol	benzyl_benzoate	-0.0172414	0.896875
bulnesol	benzyl_benzoate	-0.0172414	0.896875
cis_beta_guaiene	benzyl_benzoate	-0.0395334	0.766252
cis_cis_farnesol	benzyl_benzoate	-0.0172414	0.896875
trans_cis_farnesol	benzyl_benzoate	-0.0172414	0.896875
trans_beta_guaiene	benzyl_benzoate	-0.0432719	0.744864
trans_caryophyllene	benzyl_benzoate	-0.0978688	0.460859
caryophyllene_oxide	benzyl_benzoate	-0.0609827	0.646362
spathulenol	benzyl_benzoate	0.145662	0.270987
valencene	benzyl_benzoate	-0.0172414	0.896875
ar.curcumene	benzyl_benzoate	-0.0172414	0.896875
junipene	benzyl_benzoate	-0.0172414	0.896875
alpha_selinene	benzyl_benzoate	-0.0234473	0.86008
beta_selinene	benzyl_benzoate	-0.0172414	0.896875
guaiol	benzyl_benzoate	-0.0172414	0.896875
beta_elemene	benzyl_benzoate	-0.0302732	0.81995
trans_yophyllene	benzyl_benzoate	-0.0172414	0.896875
gamma_muurolene	benzyl_benzoate	-0.0340079	0.798179
alpha_humulene	benzyl_benzoate	-0.0245946	0.853307
trans_nerolidol	benzyl_benzoate	-0.0505143	0.703984
beta_copaen_4_alpha_ol	benzyl_benzoate	-0.0343685	0.796085
beta_gurjunene	benzyl_benzoate	-0.0172414	0.896875
oxygenate_sesquiterpene	benzyl_benzoate	-0.0172414	0.896875
delta_cadinene	benzyl_benzoate	-0.0172414	0.896875
dihyidro_beta_agarofuran	benzyl_benzoate	-0.0245902	0.853333
X10._epi_gamma_eudesmol	benzyl_benzoate	-0.024591	0.853328
X4_epi_cis_dihydro_agarofuran	benzyl_benzoate	-0.0172414	0.896875
cubenol	benzyl_benzoate	-0.0172414	0.896875
beta_bourbonene	benzyl_benzoate	-0.0172414	0.896875
beta_bisabolene	benzyl_benzoate	-0.0172414	0.896875
aromadendrene	benzyl_benzoate	-0.0172414	0.896875
elemicine	benzyl_benzoate	-0.0172414	0.896875
asaricin	benzyl_benzoate	-0.0297414	0.823061
safrol	benzyl_benzoate	-0.0303817	0.819315
methyl_iso_eugenol	benzyl_benzoate	-0.0172414	0.896875
methyl_eugenol	benzyl_benzoate	-0.0241457	0.855956
benzyl_salicylate	benzyl_benzoate	1	0
Cxerosis	X2_tridecanone	0.0125514	0.924831
linalool	X2_tridecanone	-0.0303227	0.81966
camphene	X2_tridecanone	-0.0302893	0.819855
camphor	X2_tridecanone	-0.0172414	0.896875
alpha_phellandrene	X2_tridecanone	-0.024595	0.853305
beta_phellandrene	X2_tridecanone	0.399779	0.00170691
ortho_cymene	X2_tridecanone	-0.0245918	0.853323
alpha_pinene	X2_tridecanone	0.149572	0.258191
beta_pinene	X2_tridecanone	-0.0706334	0.595002
sabinene	X2_tridecanone	-0.0245417	0.853619
gamma_cadinene	X2_tridecanone	-0.0245905	0.853331
myrcene	X2_tridecanone	-0.0342145	0.796979
delta_3_carene	X2_tridecanone	-0.0287092	0.829108
X1_8_cineole	X2_tridecanone	-0.0172414	0.896875
verbenone	X2_tridecanone	-0.0244538	0.854137
limonene	X2_tridecanone	-0.0491362	0.711703
cis_beta_ocimene	X2_tridecanone	-0.0172414	0.896875
trans_beta_ocimene	X2_tridecanone	-0.0245934	0.853314
germacreneA	X2_tridecanone	-0.0244964	0.853887
germacreneB	X2_tridecanone	-0.0301727	0.820538
germacreneD	X2_tridecanone	-0.0900743	0.497485
bicyclogermacrene	X2_tridecanone	-0.0810327	0.541788
X1_10_di_epi_cubenol	X2_tridecanone	-0.0172414	0.896875
bulnesol	X2_tridecanone	-0.0172414	0.896875
cis_beta_guaiene	X2_tridecanone	-0.0395334	0.766252
cis_cis_farnesol	X2_tridecanone	-0.0172414	0.896875
trans_cis_farnesol	X2_tridecanone	-0.0172414	0.896875
trans_beta_guaiene	X2_tridecanone	-0.0432719	0.744864
trans_caryophyllene	X2_tridecanone	-0.0978688	0.460859
caryophyllene_oxide	X2_tridecanone	-0.0609827	0.646362
spathulenol	X2_tridecanone	-0.087311	0.510823
valencene	X2_tridecanone	-0.0172414	0.896875
ar.curcumene	X2_tridecanone	-0.0172414	0.896875
junipene	X2_tridecanone	-0.0172414	0.896875
alpha_selinene	X2_tridecanone	-0.0234473	0.86008
beta_selinene	X2_tridecanone	-0.0172414	0.896875
guaiol	X2_tridecanone	-0.0172414	0.896875
beta_elemene	X2_tridecanone	-0.0302732	0.81995
trans_yophyllene	X2_tridecanone	-0.0172414	0.896875
gamma_muurolene	X2_tridecanone	-0.0340079	0.798179
alpha_humulene	X2_tridecanone	-0.0245946	0.853307
trans_nerolidol	X2_tridecanone	-0.0505143	0.703984
beta_copaen_4_alpha_ol	X2_tridecanone	-0.0343685	0.796085
beta_gurjunene	X2_tridecanone	-0.0172414	0.896875
oxygenate_sesquiterpene	X2_tridecanone	-0.0172414	0.896875
delta_cadinene	X2_tridecanone	-0.0172414	0.896875
dihyidro_beta_agarofuran	X2_tridecanone	-0.0245902	0.853333
X10._epi_gamma_eudesmol	X2_tridecanone	-0.024591	0.853328
X4_epi_cis_dihydro_agarofuran	X2_tridecanone	-0.0172414	0.896875
cubenol	X2_tridecanone	-0.0172414	0.896875
beta_bourbonene	X2_tridecanone	-0.0172414	0.896875
beta_bisabolene	X2_tridecanone	-0.0172414	0.896875
aromadendrene	X2_tridecanone	-0.0172414	0.896875
elemicine	X2_tridecanone	-0.0172414	0.896875
asaricin	X2_tridecanone	-0.0297414	0.823061
safrol	X2_tridecanone	-0.0303817	0.819315
methyl_iso_eugenol	X2_tridecanone	-0.0172414	0.896875
methyl_eugenol	X2_tridecanone	-0.0241457	0.855956
benzyl_salicylate	X2_tridecanone	-0.0172414	0.896875
benzyl_benzoate	X2_tridecanone	-0.0172414	0.896875
Cxerosis	X2_undecanone	0.0125514	0.924831
linalool	X2_undecanone	-0.0303227	0.81966
camphene	X2_undecanone	-0.0302893	0.819855
camphor	X2_undecanone	-0.0172414	0.896875
alpha_phellandrene	X2_undecanone	-0.024595	0.853305
beta_phellandrene	X2_undecanone	0.399779	0.00170691
ortho_cymene	X2_undecanone	-0.0245918	0.853323
alpha_pinene	X2_undecanone	0.149572	0.258191
beta_pinene	X2_undecanone	-0.0706334	0.595002
sabinene	X2_undecanone	-0.0245417	0.853619
gamma_cadinene	X2_undecanone	-0.0245905	0.853331
myrcene	X2_undecanone	-0.0342145	0.796979
delta_3_carene	X2_undecanone	-0.0287092	0.829108
X1_8_cineole	X2_undecanone	-0.0172414	0.896875
verbenone	X2_undecanone	-0.0244538	0.854137
limonene	X2_undecanone	-0.0491362	0.711703
cis_beta_ocimene	X2_undecanone	-0.0172414	0.896875
trans_beta_ocimene	X2_undecanone	-0.0245934	0.853314
germacreneA	X2_undecanone	-0.0244964	0.853887
germacreneB	X2_undecanone	-0.0301727	0.820538
germacreneD	X2_undecanone	-0.0900743	0.497485
bicyclogermacrene	X2_undecanone	-0.0810327	0.541788
X1_10_di_epi_cubenol	X2_undecanone	-0.0172414	0.896875
bulnesol	X2_undecanone	-0.0172414	0.896875
cis_beta_guaiene	X2_undecanone	-0.0395334	0.766252
cis_cis_farnesol	X2_undecanone	-0.0172414	0.896875
trans_cis_farnesol	X2_undecanone	-0.0172414	0.896875
trans_beta_guaiene	X2_undecanone	-0.0432719	0.744864
trans_caryophyllene	X2_undecanone	-0.0978688	0.460859
caryophyllene_oxide	X2_undecanone	-0.0609827	0.646362
spathulenol	X2_undecanone	-0.087311	0.510823
valencene	X2_undecanone	-0.0172414	0.896875
ar.curcumene	X2_undecanone	-0.0172414	0.896875
junipene	X2_undecanone	-0.0172414	0.896875
alpha_selinene	X2_undecanone	-0.0234473	0.86008
beta_selinene	X2_undecanone	-0.0172414	0.896875
guaiol	X2_undecanone	-0.0172414	0.896875
beta_elemene	X2_undecanone	-0.0302732	0.81995
trans_yophyllene	X2_undecanone	-0.0172414	0.896875
gamma_muurolene	X2_undecanone	-0.0340079	0.798179
alpha_humulene	X2_undecanone	-0.0245946	0.853307
trans_nerolidol	X2_undecanone	-0.0505143	0.703984
beta_copaen_4_alpha_ol	X2_undecanone	-0.0343685	0.796085
beta_gurjunene	X2_undecanone	-0.0172414	0.896875
oxygenate_sesquiterpene	X2_undecanone	-0.0172414	0.896875
delta_cadinene	X2_undecanone	-0.0172414	0.896875
dihyidro_beta_agarofuran	X2_undecanone	-0.0245902	0.853333
X10._epi_gamma_eudesmol	X2_undecanone	-0.024591	0.853328
X4_epi_cis_dihydro_agarofuran	X2_undecanone	-0.0172414	0.896875
cubenol	X2_undecanone	-0.0172414	0.896875
beta_bourbonene	X2_undecanone	-0.0172414	0.896875
beta_bisabolene	X2_undecanone	-0.0172414	0.896875
aromadendrene	X2_undecanone	-0.0172414	0.896875
elemicine	X2_undecanone	-0.0172414	0.896875
asaricin	X2_undecanone	-0.0297414	0.823061
safrol	X2_undecanone	-0.0303817	0.819315
methyl_iso_eugenol	X2_undecanone	-0.0172414	0.896875
methyl_eugenol	X2_undecanone	-0.0241457	0.855956
benzyl_salicylate	X2_undecanone	-0.0172414	0.896875
benzyl_benzoate	X2_undecanone	-0.0172414	0.896875
X2_tridecanone	X2_undecanone	1	0
