# Supplementary material for: Essential Oils of Aromatic Plant Species from the Atlantic Rainforest Exhibit Extensive Chemical Diversity and Antimicrobial Activity
Source: Antibiotics (Basel). 2022 Dec 19;11(12):1844. doi: 10.3390/antibiotics11121844 (PMC9774909; doi:10.3390/antibiotics11121844)
Supplement: Supplementary file 1 [file antibiotics-11-01844-s001.zip › TableS3.xlsx]

## Sheet: Plan1
row	column	Pearson´s r	p
na_Ecoli	na_Sepi	0.806823	0.0085875
na_Ecoli	na_Sau	-0.174227	0.653924
na_Sepi	na_Sau	-0.287883	0.452539
na_Ecoli	na_Cxer	-0.447023	0.227675
na_Sepi	na_Cxer	0.0238635	0.951409
na_Sau	na_Cxer	0.0134711	0.972561
na_Ecoli	prot_Ecoli	0.860038	0.00293728
na_Sepi	prot_Ecoli	0.87729	0.00188638
na_Sau	prot_Ecoli	-0.18722	0.629564
na_Cxer	prot_Ecoli	-0.13713	0.724982
na_Ecoli	prot_Sepi	0.780576	0.0130485
na_Sepi	prot_Sepi	0.943464	0.000133831
na_Sau	prot_Sepi	-0.268589	0.484669
na_Cxer	prot_Sepi	-0.0523053	0.893687
prot_Ecoli	prot_Sepi	0.904414	0.000808823
na_Ecoli	prot_Sau	-0.143031	0.713542
na_Sepi	prot_Sau	-0.280211	0.465203
na_Sau	prot_Sau	0.972813	1.06231e-05
na_Cxer	prot_Sau	-0.0983644	0.801222
prot_Ecoli	prot_Sau	-0.141566	0.716377
prot_Sepi	prot_Sau	-0.244614	0.525861
na_Ecoli	prot_Cxer	0.0179811	0.963379
na_Sepi	prot_Cxer	0.0903553	0.817177
na_Sau	prot_Cxer	0.316604	0.406495
na_Cxer	prot_Cxer	-0.0867125	0.824454
prot_Ecoli	prot_Cxer	0.140927	0.717615
prot_Sepi	prot_Cxer	-0.0142065	0.971064
prot_Sau	prot_Cxer	0.436443	0.240201
na_Ecoli	gi_Ecoli	0.777592	0.0136372
na_Sepi	gi_Ecoli	0.838517	0.00473971
na_Sau	gi_Ecoli	-0.122031	0.754464
na_Cxer	gi_Ecoli	0.0589091	0.880338
prot_Ecoli	gi_Ecoli	0.880007	0.00174905
prot_Sepi	gi_Ecoli	0.768317	0.01558
prot_Sau	gi_Ecoli	-0.161486	0.678089
prot_Cxer	gi_Ecoli	0.187785	0.628512
na_Ecoli	gi_Sepi	0.745562	0.0211087
na_Sepi	gi_Sepi	0.944219	0.000127777
na_Sau	gi_Sepi	-0.24285	0.528943
na_Cxer	gi_Sepi	0.16594	0.66961
prot_Ecoli	gi_Sepi	0.873235	0.00210506
prot_Sepi	gi_Sepi	0.950533	8.4443e-05
prot_Sau	gi_Sepi	-0.275653	0.472798
prot_Cxer	gi_Sepi	-0.130431	0.738027
gi_Ecoli	gi_Sepi	0.833252	0.00527425
na_Ecoli	gi_Sau	-0.240924	0.532319
na_Sepi	gi_Sau	-0.295521	0.44008
na_Sau	gi_Sau	0.860971	0.00287207
na_Cxer	gi_Sau	0.0169968	0.965383
prot_Ecoli	gi_Sau	-0.233025	0.546245
prot_Sepi	gi_Sau	-0.272512	0.478062
prot_Sau	gi_Sau	0.779738	0.0132121
prot_Cxer	gi_Sau	0.310388	0.416272
gi_Ecoli	gi_Sau	-0.0220755	0.955046
gi_Sepi	gi_Sau	-0.254483	0.508741
na_Ecoli	gi_Cxer	0.247686	0.520508
na_Sepi	gi_Cxer	0.678532	0.0445028
na_Sau	gi_Cxer	-0.562099	0.1152
na_Cxer	gi_Cxer	0.494467	0.176012
prot_Ecoli	gi_Cxer	0.51521	0.155759
prot_Sepi	gi_Cxer	0.562606	0.114801
prot_Sau	gi_Cxer	-0.598464	0.088652
prot_Cxer	gi_Cxer	0.0462125	0.906024
gi_Ecoli	gi_Cxer	0.609549	0.0813907
gi_Sepi	gi_Cxer	0.649423	0.0583713
gi_Sau	gi_Cxer	-0.41275	0.269564
