# Supplementary material for: Essential Oils of Aromatic Plant Species from the Atlantic Rainforest Exhibit Extensive Chemical Diversity and Antimicrobial Activity
Source: Antibiotics (Basel). 2022 Dec 19;11(12):1844. doi: 10.3390/antibiotics11121844 (PMC9774909; doi:10.3390/antibiotics11121844)
Supplement: Supplementary file 1 [file antibiotics-11-01844-s001.zip › TableS4.xlsx]

## Sheet: Plan1
Molecule		Canonical SMILES	Formula	MW	#Heavy atoms	#Aromatic heavy atoms	Fraction Csp3	#Rotatable bonds	#H-bond acceptors	#H-bond donors	MR	TPSA	iLOGP	XLOGP3	WLOGP	MLOGP	Silicos-IT Log P	Consensus Log P	ESOL Log S	ESOL Solubility (mg/ml)	ESOL Solubility (mol/l)	ESOL Class	Ali Log S	Ali Solubility (mg/ml)	Ali Solubility (mol/l)	Ali Class	Silicos-IT LogSw	Silicos-IT Solubility (mg/ml)	Silicos-IT Solubility (mol/l)	Silicos-IT class	GI absorption	BBB permeant	Pgp substrate	CYP1A2 inhibitor	CYP2C19 inhibitor	CYP2C9 inhibitor	CYP2D6 inhibitor	CYP3A4 inhibitor	log Kp (cm/s)	Lipinski #violations	Ghose #violations	Veber #violations	Egan #violations	Muegge #violations	Bioavailability Score	PAINS #alerts	Brenk #alerts	Leadlikeness #violations	Synthetic Accessibility
Molecule 1	alpha_pinene	CC1=CCC2CC1C2(C)C	C10H16	136.23	10	0	0.8	0	0	0	45.22	0	2.63	4.48	3	4.29	2.79	3.44	-3.51	0.0424	0.000311	Soluble	-4.2	0.00859	6.31e-05	Moderately soluble	-2.23	0.806	0.00592	Soluble	Low	Yes	No	No	No	Yes	No	No	-3.95	1	1	0	0	2	0.55	0	1	2	4.44
Molecule 2	spathulenol	C=C1CCC2C(C3C1CCC3(C)O)C2(C)C	C15H24O	220.35	16	0	0.87	0	1	1	68.34	20.23	2.88	3.11	3.39	3.67	3.27	3.26	-3.17	0.151	0.000683	Soluble	-3.2	0.138	0.000626	Soluble	-2.96	0.239	0.00109	Soluble	High	Yes	No	No	Yes	No	No	No	-5.44	0	0	0	0	1	0.55	0	1	1	3.78
Molecule 3	trans_caryophyllene	CC1=CCCC(=C)C2C(CC1)C(C2)(C)C	C15H24	204.35	15	0	0.73	0	0	0	68.78	0	3.29	4.38	4.73	4.63	4.19	4.24	-3.87	0.0278	0.000136	Soluble	-4.1	0.0164	8.01e-05	Moderately soluble	-3.77	0.0349	0.000171	Soluble	Low	No	No	No	Yes	Yes	No	No	-4.44	1	0	0	0	1	0.55	0	1	2	4.51
Molecule 4	alpha_humulene	CC1=CCC(C)(C)C=CCC(=CCC1)C	C15H24	204.35	15	0	0.6	0	0	0	70.42	0	3.27	4.55	5.04	4.53	3.91	4.26	-3.97	0.0217	0.000106	Soluble	-4.27	0.0109	5.34e-05	Moderately soluble	-3.52	0.0619	0.000303	Soluble	Low	No	No	No	No	Yes	No	No	-4.32	1	0	0	0	1	0.55	0	1	2	3.66
Molecule 5	beta_pinene	C=C1CCC2CC1C2(C)C	C10H16	136.23	10	0	0.8	0	0	0	45.22	0	2.59	4.16	3	4.29	3.08	3.42	-3.31	0.0674	0.000495	Soluble	-3.87	0.0185	0.000136	Soluble	-2.48	0.455	0.00334	Soluble	Low	Yes	No	No	No	Yes	No	No	-4.18	1	1	0	0	2	0.55	0	1	2	3.73
Molecule 6	limonene	CC1=CCC(CC1)C(=C)C	C10H16	136.23	10	0	0.6	1	0	0	47.12	0	2.72	4.57	3.31	3.27	2.97	3.37	-3.5	0.0433	0.000318	Soluble	-4.29	0.00693	5.09e-05	Moderately soluble	-2.26	0.754	0.00553	Soluble	Low	Yes	No	No	No	Yes	No	No	-3.89	0	1	0	0	2	0.55	0	1	2	3.46
Molecule 7	beta_elemene	C=CC1(C)CCC(CC1C(=C)C)C(=C)C	C15H24	204.35	15	0	0.6	3	0	0	70.42	0	3.37	6.11	4.75	4.53	4.5	4.65	-4.76	0.00357	1.74e-05	Moderately soluble	-5.89	0.000262	1.28e-06	Moderately soluble	-3.58	0.0536	0.000262	Soluble	Low	No	No	No	Yes	Yes	No	No	-3.21	1	0	0	0	2	0.55	0	1	2	3.63
Molecule 8	myrcene	C=CC(=C)CCC=C(C)C	C10H16	136.23	10	0	0.4	4	0	0	48.76	0	2.89	4.17	3.48	3.56	3.05	3.43	-3.05	0.122	0.000896	Soluble	-3.88	0.018	0.000132	Soluble	-2.42	0.524	0.00385	Soluble	Low	Yes	No	No	No	No	No	No	-4.17	0	1	0	0	2	0.55	0	2	2	2.85
Molecule 9	alpha_copaene	CC(C1CCC2(C3C1C2C(=CC3)C)C)C	C15H24	204.35	15	0	0.87	1	0	0	67.14	0	3.4	4.47	4.27	5.65	3.73	4.3	-3.86	0.0284	0.000139	Soluble	-4.19	0.0132	6.46e-05	Moderately soluble	-3.07	0.174	0.000851	Soluble	Low	Yes	No	Yes	Yes	Yes	No	No	-4.37	1	0	0	0	1	0.55	0	1	2	4.62
Molecule 10	delta_cadinene	CC1=CC2C(=C(C)CCC2C(C)C)CC1	C15H24	204.35	15	0	0.73	1	0	0	69.04	0	3.32	3.8	4.73	4.63	4.12	4.12	-3.43	0.0751	0.000367	Soluble	-3.49	0.0655	0.00032	Soluble	-3.52	0.0619	0.000303	Soluble	Low	No	No	No	Yes	Yes	No	No	-4.85	1	0	0	0	1	0.55	0	1	2	4.14
Molecule 11	germacreneA	CC1=CCCC(=CCC(CC1)C(=C)C)C	C15H24	204.35	15	0	0.6	1	0	0	70.68	0	3.31	5.87	5.04	4.53	4.14	4.58	-4.74	0.00373	1.82e-05	Moderately soluble	-5.64	0.000465	2.28e-06	Moderately soluble	-3.55	0.0579	0.000283	Soluble	Low	No	No	No	No	Yes	No	No	-3.38	1	0	0	0	2	0.55	0	1	2	4.1
Molecule 12	beta_bisabolene	CC(=CCCC(=C)C1CCC(=CC1)C)C	C15H24	204.35	15	0	0.6	4	0	0	70.68	0	3.67	6.43	5.04	4.53	4.5	4.83	-4.89	0.00261	1.28e-05	Moderately soluble	-6.22	0.000122	5.98e-07	Poorly soluble	-3.58	0.0536	0.000262	Soluble	Low	No	No	No	No	Yes	No	No	-2.98	1	0	0	0	2	0.55	0	1	2	3.9
Molecule 13	bicyclogermacrene	CC1=CCCC(=CC2C(CC1)C2(C)C)C	C15H24	204.35	15	0	0.73	0	0	0	68.78	0	3.34	4.14	4.73	4.63	3.91	4.15	-3.72	0.0394	0.000193	Soluble	-3.85	0.029	0.000142	Soluble	-3.52	0.0619	0.000303	Soluble	Low	No	No	No	Yes	Yes	No	No	-4.61	1	0	0	0	1	0.55	0	1	2	4.34
Molecule 14	caryophyllene_oxide	C=C1CCC2OC2(CCC2C1CC2(C)C)C	C15H24O	220.35	16	0	0.87	0	1	0	68.27	12.53	3.15	3.56	3.94	3.67	4.07	3.68	-3.45	0.0784	0.000356	Soluble	-3.51	0.0683	0.00031	Soluble	-3.51	0.0681	0.000309	Soluble	High	Yes	No	No	Yes	Yes	No	No	-5.12	0	0	0	0	1	0.55	0	2	2	4.35
Molecule 15	gamma_cadinene	CC1=CC2C(CC1)C(=C)CCC2C(C)C	C15H24	204.35	15	0	0.73	1	0	0	69.04	0	3.39	4.31	4.58	4.63	4.01	4.18	-3.76	0.0358	0.000175	Soluble	-4.02	0.0194	9.47e-05	Moderately soluble	-3.32	0.0983	0.000481	Soluble	Low	No	No	No	Yes	Yes	No	No	-4.49	1	0	0	0	1	0.55	0	1	2	4.35
Molecule 16	germacreneD	CC1=CCCC(=C)C=CC(CC1)C(C)C	C15H24	204.35	15	0	0.6	1	0	0	70.68	0	3.32	4.74	4.89	4.53	4.01	4.3	-4.03	0.0192	9.39e-05	Moderately soluble	-4.47	0.00693	3.39e-05	Moderately soluble	-3.32	0.0983	0.000481	Soluble	Low	No	No	No	No	Yes	No	No	-4.18	1	0	0	0	1	0.55	0	1	2	4.55
Molecule 17	1_epi_cubenol	CC1=CC2C(CC1)(O)C(C)CCC2C(C)C	C15H26O	222.37	16	0	0.87	1	1	1	70.72	20.23	3.24	3.7	3.78	3.67	3.22	3.52	-3.48	0.073	0.000328	Soluble	-3.82	0.034	0.000153	Soluble	-2.73	0.41	0.00185	Soluble	High	Yes	No	No	Yes	Yes	No	No	-5.03	0	0	0	0	1	0.55	0	1	2	4.34
Molecule 18	trans_beta_guaiene	CC(=C1CCC(C2=C(C1)C(C)CC2)C)C	C15H24	204.35	15	0	0.73	0	0	0	69.04	0	3.37	4.07	4.87	4.63	4.25	4.24	-3.67	0.0436	0.000213	Soluble	-3.77	0.0343	0.000168	Soluble	-3.75	0.0363	0.000178	Soluble	Low	No	No	No	Yes	Yes	No	No	-4.66	1	0	0	0	1	0.55	0	1	2	4.45
Molecule 19	trans_beta_ocimene	C=CC(=CCC=C(C)C)C	C10H16	136.23	10	0	0.4	3	0	0	48.76	0	2.8	4.26	3.48	3.56	2.88	3.4	-3.17	0.092	0.000675	Soluble	-3.97	0.0145	0.000107	Soluble	-2.04	1.24	0.0091	Soluble	Low	Yes	No	No	No	No	No	No	-4.11	0	1	0	0	2	0.55	0	2	2	3.63
Molecule 20	valencene	CC(=C)C1CCC2=CCCC(C2(C1)C)C	C15H24	204.35	15	0	0.73	1	0	0	68.78	0	3.32	5.24	4.73	4.63	4.14	4.41	-4.34	0.00929	4.55e-05	Moderately soluble	-4.99	0.0021	1.03e-05	Moderately soluble	-3.55	0.0579	0.000283	Soluble	Low	No	No	No	Yes	Yes	No	No	-3.83	1	0	0	0	2	0.55	0	1	2	4.22
Molecule 21	1_8_cineole	CC12CCC(CC1)C(O2)(C)C	C10H18O	154.25	11	0	1	0	1	0	47.12	9.23	2.58	2.74	2.74	2.45	2.86	2.67	-2.52	0.463	0.003	Soluble	-2.59	0.398	0.00258	Soluble	-2.45	0.545	0.00353	Soluble	High	Yes	No	No	No	No	No	No	-5.3	0	1	0	0	2	0.55	0	0	1	3.65
Molecule 22	7_epi_alpha_eudesmol	CC1=CCCC2(C1CC(CC2)C(O)(C)C)C	C15H26O	222.37	16	0	0.87	1	1	1	70.46	20.23	3.18	3.5	3.92	3.67	3.35	3.52	-3.36	0.0976	0.000439	Soluble	-3.61	0.0548	0.000247	Soluble	-2.96	0.241	0.00108	Soluble	High	Yes	No	No	No	No	No	No	-5.17	0	0	0	0	1	0.55	0	1	1	4.08
Molecule 23	alpha_cadinene	CC1=CC2C(CC1)C(=CCC2C(C)C)C	C15H24	204.35	15	0	0.73	1	0	0	69.04	0	3.38	4.08	4.58	4.63	3.73	4.08	-3.61	0.05	0.000245	Soluble	-3.79	0.0335	0.000164	Soluble	-3.07	0.174	0.000851	Soluble	Low	No	No	No	Yes	Yes	No	No	-4.65	1	0	0	0	1	0.55	0	1	2	4.35
Molecule 24	delta_elemene	C=CC1(C)CCC(=CC1C(=C)C)C(C)C	C15H24	204.35	15	0	0.6	3	0	0	70.42	0	3.43	5.27	4.75	4.53	4.48	4.49	-4.23	0.0121	5.9e-05	Moderately soluble	-5.02	0.00195	9.55e-06	Moderately soluble	-3.55	0.0573	0.000281	Soluble	Low	No	No	No	Yes	Yes	No	No	-3.8	1	0	0	0	2	0.55	0	1	2	4.25
Molecule 25	selina_3_7 _11_diene	CC1=CCCC2(C1CC(=C(C)C)CC2)C	C15H24	204.35	15	0	0.73	0	0	0	68.78	0	3.34	4.44	4.87	4.63	4.25	4.31	-3.9	0.0255	0.000125	Soluble	-4.16	0.0142	6.94e-05	Moderately soluble	-3.75	0.0363	0.000178	Soluble	Low	No	No	No	Yes	Yes	No	No	-4.39	1	0	0	0	1	0.55	0	1	2	4.14
Molecule 26	trans_sabinol	CC(C12CC2C(=C)C(C1)O)C	C10H16O	152.23	11	0	0.8	1	1	1	46.38	20.23	2.44	1.79	1.97	2.3	2.31	2.16	-1.85	2.17	0.0143	Very soluble	-1.83	2.23	0.0147	Very soluble	-1.69	3.14	0.0207	Soluble	High	Yes	No	No	No	No	No	No	-5.96	0	1	0	0	2	0.55	0	1	1	3.02
Molecule 27	verbenone	CC1=CC(=O)C2CC1C2(C)C	C10H14O	150.22	11	0	0.7	0	1	0	45.42	17.07	2.19	2.23	2.18	2.2	2.45	2.25	-2.18	1	0.00666	Soluble	-2.22	0.897	0.00597	Soluble	-2.13	1.12	0.00743	Soluble	High	Yes	No	No	No	No	No	No	-5.63	0	1	0	0	2	0.55	0	0	1	4.23
