# Supplementary material for: Essential Oils of Aromatic Plant Species from the Atlantic Rainforest Exhibit Extensive Chemical Diversity and Antimicrobial Activity
Source: Antibiotics (Basel). 2022 Dec 19;11(12):1844. doi: 10.3390/antibiotics11121844 (PMC9774909; doi:10.3390/antibiotics11121844)
Supplement: Supplementary file 1 [file antibiotics-11-01844-s001.zip › TableS5.xlsx]

## Sheet: Plan1
Annonaceae	Lauraceae	Myrtaceae	Rutaceae	Salicaceae
CHEMBL1293194	CHEMBL4481	CHEMBL4481	CHEMBL5421	CHEMBL4481
CHEMBL1741208	CHEMBL5421	CHEMBL5421	CHEMBL4481	CHEMBL5421
CHEMBL2095202	Cytochrome P450	Cytochrome P450	Cytochrome P450	Cytochrome P450
CHEMBL3568	Electrochemical transporter	Electrochemical transporter	Electrochemical transporter	Electrochemical transporter
CHEMBL4481	Enzyme	Enzyme	Enzyme	Enzyme
CHEMBL4685	Family A G protein-coupled receptor	Family A G protein-coupled receptor	Family A G protein-coupled receptor	Family A G protein-coupled receptor
CHEMBL5421	Fatty acid binding protein family	Fatty acid binding protein family	Fatty acid binding protein family	Fatty acid binding protein family
Cytochrome P450	Hydrolase	Hydrolase	Hydrolase	Hydrolase
Electrochemical transporter	Isomerase	Isomerase	Isomerase	Isomerase
Enzyme	Kinase	Kinase	Kinase	Kinase
Eraser	Membrane receptor	Ligand-gated ion channel	Ligand-gated ion channel	Ligand-gated ion channel
Family A G protein-coupled receptor	Nuclear receptor	Membrane receptor	Membrane receptor	Membrane receptor
Fatty acid binding protein family	Other membrane protein	Nuclear receptor	Nuclear receptor	Nuclear receptor
Hydrolase	Oxidoreductase	Other membrane protein	Other membrane protein	Other cytosolic protein
Isomerase	Phosphatase	Oxidoreductase	Oxidoreductase	Other membrane protein
Kinase	Phosphodiesterase	Phosphatase	Phosphatase	Oxidoreductase
Ligand-gated ion channel	Protease	Phosphodiesterase	Phosphodiesterase	Phosphatase
Ligase	Secreted protein	Protease	Protease	Protease
Lyase	Surface antigen	Secreted protein	Secreted protein	Secreted protein
Membrane receptor	Unclassified protein	Surface antigen	Surface antigen	Transcription factor
Nuclear receptor	Voltage-gated ion channel	Transcription factor	Transcription factor	Unclassified protein
Other cytosolic protein		Unclassified protein	Unclassified protein	Voltage-gated ion channel
Other membrane protein		Voltage-gated ion channel	Voltage-gated ion channel	Writer
Other nuclear protein
Oxidoreductase
Phosphatase
Phosphodiesterase
Primary active transporter
Protease
Reader
Secreted protein
Surface antigen
Transcription factor
Transferase
Unclassified protein
Voltage-gated ion channel
Writer
